# Supplementary material for: Highly stereoselective double (R)-phenylglycinol-induced cyclocondensation reactions of symmetric aryl bis(oxoacids)
Source: Royal Society of Chemistry journal article supplement (doi:10.1039/c0ob00970a), 2010-12-23
Supplement: c0ob00970a.pdf [file c0ob00970a.pdf]

## Highly stereoselective double (*R*)-phenylglycinol-induced cyclocondensation reactions of symmetric aryl bis(oxoacids)

Mercedes Amat,<sup>\*a</sup> Carlos Arróniz,<sup>a</sup> Elies Molins,<sup>b</sup> Carmen Escolano,<sup>\*a</sup> and Joan Bosch<sup>a</sup>

<sup>a</sup> *Laboratory of Organic Chemistry, Faculty of Pharmacy, and Institute of Biomedicine (IBUB), 08028-Barcelona, Spain. E-mail: [amat@ub.edu](mailto:amat@ub.edu); [cescolano@ub.edu](mailto:cescolano@ub.edu)*

<sup>b</sup> *Institut de Ciència de Materials de Barcelona (CSIC), Campus UAB, 08193-Cerdanyola, Spain. E-mail: [elies@icmab.es](mailto:elies@icmab.es)*

### Table of contents

|                                                                                                                  |     |
|------------------------------------------------------------------------------------------------------------------|-----|
| 1. Cartesian coordinates and total energies for compound <i>trans</i> -phenyl- <b>8</b> at HF/6-31G(d) level:    | S2  |
| 2. Cartesian coordinates and total energies for compound <i>trans</i> -phenyl- <b>8</b> at B3LYP/6-31G(d) level: | S4  |
| 3. Cartesian coordinates and total energies for compound <b>8</b> at HF/6-31G(d) level:                          | S6  |
| 4. Cartesian coordinates and total energies for compound <b>8</b> at B3LYP/6-31G(d) level:                       | S8  |
| 5. X-ray crystallographic data for compounds <b>9-11</b> , <b>18</b> and <b>21</b> :                             | S10 |
| 6. <sup>13</sup> C NMR and <sup>1</sup> H NMR spectra for compounds <b>1-7</b> and <b>9-22</b> :                 | S40 |

## 1. Cartesian coordinates (Å) for compound *trans*-phenyl-8 at HF/6-31G(d) level

Standard orientation:

| Center Number | Atomic Number | Atomic Type | Coordinates (Angstroms) |           |           |
|---------------|---------------|-------------|-------------------------|-----------|-----------|
|               |               |             | X                       | Y         | Z         |
| 1             | 6             | 0           | 0.396368                | 1.780620  | 0.169028  |
| 2             | 6             | 0           | -0.470206               | 2.415007  | -0.911400 |
| 3             | 6             | 0           | -0.934686               | 1.219457  | -1.755036 |
| 4             | 6             | 0           | -0.961455               | 0.071957  | -0.733107 |
| 5             | 8             | 0           | -0.460481               | -1.129999 | -1.240658 |
| 6             | 6             | 0           | 0.136071                | -1.795092 | -0.149512 |
| 7             | 6             | 0           | 0.825509                | -0.679289 | 0.679814  |
| 8             | 7             | 0           | 0.036297                | 0.466261  | 0.239914  |
| 9             | 8             | 0           | 1.220721                | 2.324553  | 0.836982  |
| 10            | 6             | 0           | -4.010539               | 0.217112  | 1.580946  |
| 11            | 6             | 0           | -2.725158               | 0.403268  | 1.087924  |
| 12            | 6             | 0           | -2.350510               | -0.148477 | -0.127331 |
| 13            | 6             | 0           | -3.282713               | -0.898545 | -0.841134 |
| 14            | 6             | 0           | -4.560899               | -1.085909 | -0.350044 |
| 15            | 6             | 0           | -4.930373               | -0.525401 | 0.865166  |
| 16            | 6             | 0           | 2.809545                | -0.494181 | -0.889570 |
| 17            | 6             | 0           | 2.315902                | -0.555433 | 0.410646  |
| 18            | 6             | 0           | 3.212258                | -0.536046 | 1.466685  |
| 19            | 6             | 0           | 4.578027                | -0.458111 | 1.236504  |
| 20            | 6             | 0           | 5.060051                | -0.396570 | -0.057926 |
| 21            | 6             | 0           | 4.169945                | -0.414069 | -1.122229 |
| 22            | 1             | 0           | 0.104181                | 3.149217  | -1.459457 |
| 23            | 1             | 0           | -1.302880               | 2.928442  | -0.440714 |
| 24            | 1             | 0           | -1.886608               | 1.373888  | -2.243355 |
| 25            | 1             | 0           | -0.193151               | 0.977370  | -2.507518 |
| 26            | 1             | 0           | -0.624064               | -2.296701 | 0.439347  |
| 27            | 1             | 0           | 0.829585                | -2.525494 | -0.533970 |
| 28            | 1             | 0           | 0.677226                | -0.856802 | 1.737349  |
| 29            | 1             | 0           | -4.284597               | 0.650276  | 2.526400  |
| 30            | 1             | 0           | -2.016440               | 0.970415  | 1.661980  |
| 31            | 1             | 0           | -2.997600               | -1.343715 | -1.776942 |
| 32            | 1             | 0           | -5.268357               | -1.670445 | -0.910891 |
| 33            | 1             | 0           | -5.924532               | -0.671741 | 1.248108  |
| 34            | 1             | 0           | 2.127889                | -0.514822 | -1.721254 |
| 35            | 1             | 0           | 2.845933                | -0.570500 | 2.477570  |
| 36            | 1             | 0           | 5.259286                | -0.440350 | 2.068342  |
| 37            | 1             | 0           | 6.118135                | -0.333883 | -0.239461 |
| 38            | 1             | 0           | 4.537166                | -0.367209 | -2.132073 |

Total energy (Hartrees) for compound *trans*-phenyl-8 at HF/6-31G(d) level.

|                                              |                             |
|----------------------------------------------|-----------------------------|
| Zero-point correction=                       | 0.336829 (Hartree/Particle) |
| Thermal correction to Energy=                | 0.352107                    |
| Thermal correction to Enthalpy=              | 0.353051                    |
| Thermal correction to Gibbs Free Energy=     | 0.292293                    |
| Sum of electronic and zero-point Energies=   | -895.385373                 |
| Sum of electronic and thermal Energies=      | -895.370095                 |
| Sum of electronic and thermal Enthalpies=    | -895.369151                 |
| Sum of electronic and thermal Free Energies= | -895.429910                 |

---

## 2. Cartesian coordinates (Å) for compound *trans*-phenyl-8 at B3LYP/6-31G(d) level

Standard orientation:

| Center<br>Number | Atomic<br>Number | Atomic<br>Type | Coordinates (Angstroms) |           |           |
|------------------|------------------|----------------|-------------------------|-----------|-----------|
|                  |                  |                | X                       | Y         | Z         |
| 1                | 6                | 0              | 0.438433                | 1.794512  | 0.174497  |
| 2                | 6                | 0              | -0.443270               | 2.457124  | -0.894492 |
| 3                | 6                | 0              | -0.959912               | 1.276642  | -1.738676 |
| 4                | 6                | 0              | -0.977924               | 0.101457  | -0.734224 |
| 5                | 8                | 0              | -0.458350               | -1.103479 | -1.294319 |
| 6                | 6                | 0              | 0.120938                | -1.797216 | -0.183612 |
| 7                | 6                | 0              | 0.817656                | -0.694612 | 0.677436  |
| 8                | 7                | 0              | 0.030383                | 0.476730  | 0.257742  |
| 9                | 8                | 0              | 1.315737                | 2.316153  | 0.834458  |
| 10               | 6                | 0              | -4.051289               | 0.248806  | 1.571973  |
| 11               | 6                | 0              | -2.759499               | 0.445034  | 1.076760  |
| 12               | 6                | 0              | -2.364940               | -0.145451 | -0.127883 |
| 13               | 6                | 0              | -3.281629               | -0.942903 | -0.827262 |
| 14               | 6                | 0              | -4.569249               | -1.141395 | -0.331306 |
| 15               | 6                | 0              | -4.959342               | -0.543241 | 0.869697  |
| 16               | 6                | 0              | 2.807548                | -0.498551 | -0.894245 |
| 17               | 6                | 0              | 2.309699                | -0.569964 | 0.414161  |
| 18               | 6                | 0              | 3.211720                | -0.567005 | 1.481344  |
| 19               | 6                | 0              | 4.586625                | -0.494105 | 1.252101  |
| 20               | 6                | 0              | 5.074337                | -0.422260 | -0.052643 |
| 21               | 6                | 0              | 4.179923                | -0.424552 | -1.125923 |
| 22               | 1                | 0              | 0.146090                | 3.185539  | -1.456367 |
| 23               | 1                | 0              | -1.261138               | 3.001039  | -0.405865 |
| 24               | 1                | 0              | -1.936130               | 1.451905  | -2.195839 |
| 25               | 1                | 0              | -0.243650               | 1.025967  | -2.528072 |
| 26               | 1                | 0              | -0.660864               | -2.304147 | 0.397678  |
| 27               | 1                | 0              | 0.821579                | -2.535023 | -0.576045 |
| 28               | 1                | 0              | 0.661820                | -0.897786 | 1.742706  |
| 29               | 1                | 0              | -4.343146               | 0.711831  | 2.510961  |
| 30               | 1                | 0              | -2.051019               | 1.049180  | 1.635518  |
| 31               | 1                | 0              | -2.973126               | -1.416340 | -1.754737 |
| 32               | 1                | 0              | -5.268302               | -1.766362 | -0.881009 |
| 33               | 1                | 0              | -5.963142               | -0.698087 | 1.256205  |
| 34               | 1                | 0              | 2.114297                | -0.506526 | -1.731428 |
| 35               | 1                | 0              | 2.835008                | -0.611436 | 2.500496  |
| 36               | 1                | 0              | 5.274378                | -0.488544 | 2.093523  |
| 37               | 1                | 0              | 6.144278                | -0.363502 | -0.233652 |
| 38               | 1                | 0              | 4.552353                | -0.370118 | -2.145610 |

Total energy (Hartrees) for compound *trans*-phenyl-8 at B3LYP/6-31G(d) level.

|                                              |                             |
|----------------------------------------------|-----------------------------|
| Zero-point correction=                       | 0.313536 (Hartree/Particle) |
| Thermal correction to Energy=                | 0.330013                    |
| Thermal correction to Enthalpy=              | 0.330957                    |
| Thermal correction to Gibbs Free Energy=     | 0.267925                    |
| Sum of electronic and zero-point Energies=   | -901.043759                 |
| Sum of electronic and thermal Energies=      | -901.027283                 |
| Sum of electronic and thermal Enthalpies=    | -901.026338                 |
| Sum of electronic and thermal Free Energies= | -901.089371                 |

---

### 3. Cartesian coordinates (Å) for compound 8 at HF/6-31G(d) level

Standard orientation:

| Center<br>Number | Atomic<br>Number | Atomic<br>Type | Coordinates (Angstroms) |           |           |
|------------------|------------------|----------------|-------------------------|-----------|-----------|
|                  |                  |                | X                       | Y         | Z         |
| 1                | 6                | 0              | 0.117658                | 2.231144  | -0.993775 |
| 2                | 6                | 0              | -1.309121               | 2.684257  | -1.243978 |
| 3                | 6                | 0              | -2.035579               | 2.226078  | 0.027038  |
| 4                | 6                | 0              | -1.238645               | 0.982870  | 0.475066  |
| 5                | 8                | 0              | -0.943168               | 1.030162  | 1.841956  |
| 6                | 6                | 0              | 0.312046                | 0.416136  | 2.012312  |
| 7                | 6                | 0              | 1.136206                | 0.858423  | 0.784874  |
| 8                | 7                | 0              | 0.061704                | 1.138376  | -0.165681 |
| 9                | 8                | 0              | 1.119353                | 2.734519  | -1.399357 |
| 10               | 6                | 0              | -2.505866               | -2.054217 | -1.467133 |
| 11               | 6                | 0              | -1.795541               | -0.910075 | -1.135169 |
| 12               | 6                | 0              | -1.944750               | -0.323863 | 0.115030  |
| 13               | 6                | 0              | -2.818581               | -0.904203 | 1.028514  |
| 14               | 6                | 0              | -3.524971               | -2.048268 | 0.698228  |
| 15               | 6                | 0              | -3.372301               | -2.626726 | -0.552110 |
| 16               | 6                | 0              | 3.527584                | 0.199029  | 0.428309  |
| 17               | 6                | 0              | 2.185269                | -0.137532 | 0.335058  |
| 18               | 6                | 0              | 1.845027                | -1.400072 | -0.142318 |
| 19               | 6                | 0              | 2.827067                | -2.300723 | -0.512181 |
| 20               | 6                | 0              | 4.167217                | -1.956211 | -0.409228 |
| 21               | 6                | 0              | 4.515164                | -0.703637 | 0.061565  |
| 22               | 1                | 0              | -1.693058               | 2.190457  | -2.131339 |
| 23               | 1                | 0              | -1.338168               | 3.751151  | -1.414775 |
| 24               | 1                | 0              | -1.937950               | 2.973821  | 0.805215  |
| 25               | 1                | 0              | -3.085527               | 2.018115  | -0.121780 |
| 26               | 1                | 0              | 0.735443                | 0.758107  | 2.944921  |
| 27               | 1                | 0              | 0.204841                | -0.661945 | 2.046279  |
| 28               | 1                | 0              | 1.634564                | 1.795009  | 1.001981  |
| 29               | 1                | 0              | -2.375665               | -2.497938 | -2.438123 |
| 30               | 1                | 0              | -1.110687               | -0.487492 | -1.846712 |
| 31               | 1                | 0              | -2.937192               | -0.461971 | 1.999945  |
| 32               | 1                | 0              | -4.192454               | -2.488437 | 1.417559  |
| 33               | 1                | 0              | -3.920168               | -3.515939 | -0.808017 |
| 34               | 1                | 0              | 3.808220                | 1.176903  | 0.778171  |
| 35               | 1                | 0              | 0.811451                | -1.678722 | -0.233327 |
| 36               | 1                | 0              | 2.547827                | -3.271460 | -0.881722 |
| 37               | 1                | 0              | 4.929485                | -2.657640 | -0.698173 |
| 38               | 1                | 0              | 5.550329                | -0.422559 | 0.138255  |

Total energy (Hartrees) for compound 8 at HF/6-31G(d) level.

|                                              |                             |
|----------------------------------------------|-----------------------------|
| Zero-point correction=                       | 0.336947 (Hartree/Particle) |
| Thermal correction to Energy=                | 0.352231                    |
| Thermal correction to Enthalpy=              | 0.353175                    |
| Thermal correction to Gibbs Free Energy=     | 0.292273                    |
| Sum of electronic and zero-point Energies=   | -895.389567                 |
| Sum of electronic and thermal Energies=      | -895.374283                 |
| Sum of electronic and thermal Enthalpies=    | -895.373339                 |
| Sum of electronic and thermal Free Energies= | -895.434241                 |

---

#### 4. Cartesian coordinates (Å) for compound 8 at B3LYP/6-31G(d) level

Standard orientation:

| Center<br>Number | Atomic<br>Number | Atomic<br>Type | Coordinates (Angstroms) |           |           |
|------------------|------------------|----------------|-------------------------|-----------|-----------|
|                  |                  |                | X                       | Y         | Z         |
| 1                | 6                | 0              | 0.086843                | 2.313968  | -0.976386 |
| 2                | 6                | 0              | -1.361404               | 2.735098  | -1.232001 |
| 3                | 6                | 0              | -2.105942               | 2.206827  | 0.007766  |
| 4                | 6                | 0              | -1.263424               | 0.985390  | 0.466281  |
| 5                | 8                | 0              | -0.970769               | 1.066002  | 1.861205  |
| 6                | 6                | 0              | 0.310871                | 0.454770  | 2.021240  |
| 7                | 6                | 0              | 1.135269                | 0.890827  | 0.775105  |
| 8                | 7                | 0              | 0.046868                | 1.181193  | -0.175717 |
| 9                | 8                | 0              | 1.102566                | 2.861012  | -1.359997 |
| 10               | 6                | 0              | -2.448679               | -2.094269 | -1.490484 |
| 11               | 6                | 0              | -1.777224               | -0.915818 | -1.158570 |
| 12               | 6                | 0              | -1.919963               | -0.351647 | 0.115057  |
| 13               | 6                | 0              | -2.745397               | -0.986809 | 1.051320  |
| 14               | 6                | 0              | -3.412427               | -2.166903 | 0.720576  |
| 15               | 6                | 0              | -3.268453               | -2.723079 | -0.552016 |
| 16               | 6                | 0              | 3.528944                | 0.195179  | 0.426682  |
| 17               | 6                | 0              | 2.169970                | -0.121626 | 0.325480  |
| 18               | 6                | 0              | 1.806444                | -1.385990 | -0.158312 |
| 19               | 6                | 0              | 2.782790                | -2.309609 | -0.529255 |
| 20               | 6                | 0              | 4.137275                | -1.985832 | -0.418414 |
| 21               | 6                | 0              | 4.508451                | -0.729645 | 0.060633  |
| 22               | 1                | 0              | -1.723430               | 2.268266  | -2.156430 |
| 23               | 1                | 0              | -1.416282               | 3.817906  | -1.363074 |
| 24               | 1                | 0              | -2.072150               | 2.942393  | 0.817706  |
| 25               | 1                | 0              | -3.148830               | 1.944526  | -0.181136 |
| 26               | 1                | 0              | 0.739894                | 0.811889  | 2.959862  |
| 27               | 1                | 0              | 0.219494                | -0.638907 | 2.059363  |
| 28               | 1                | 0              | 1.648950                | 1.838016  | 0.975026  |
| 29               | 1                | 0              | -2.325306               | -2.522855 | -2.481644 |
| 30               | 1                | 0              | -1.123924               | -0.440927 | -1.884716 |
| 31               | 1                | 0              | -2.851931               | -0.553898 | 2.041038  |
| 32               | 1                | 0              | -4.044149               | -2.653224 | 1.459357  |
| 33               | 1                | 0              | -3.788165               | -3.642140 | -0.809183 |
| 34               | 1                | 0              | 3.822619                | 1.178941  | 0.785422  |
| 35               | 1                | 0              | 0.755974                | -1.644127 | -0.256494 |
| 36               | 1                | 0              | 2.485220                | -3.284397 | -0.907069 |
| 37               | 1                | 0              | 4.896848                | -2.706841 | -0.708745 |
| 38               | 1                | 0              | 5.559058                | -0.464077 | 0.142866  |



Total energy (Hartrees) for compound 8 at B3LYP /6-31G(d) level.

|                                              |                             |
|----------------------------------------------|-----------------------------|
| Zero-point correction=                       | 0.313675 (Hartree/Particle) |
| Thermal correction to Energy=                | 0.330132                    |
| Thermal correction to Enthalpy=              | 0.331076                    |
| Thermal correction to Gibbs Free Energy=     | 0.268134                    |
| Sum of electronic and zero-point Energies=   | -901.047275                 |
| Sum of electronic and thermal Energies=      | -901.030818                 |
| Sum of electronic and thermal Enthalpies=    | -901.029874                 |
| Sum of electronic and thermal Free Energies= | -901.092815                 |

---

## 5. X-ray crystallographic data for compounds 9-11, 18 and 21

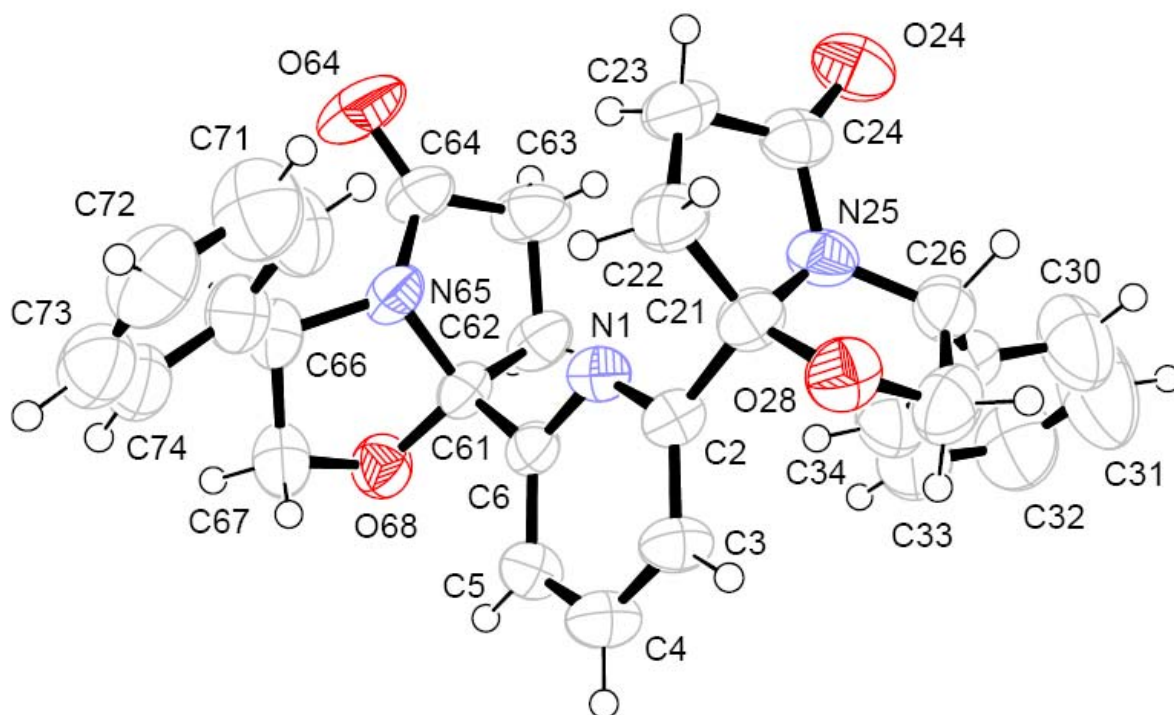

**Fig S1** ORTEP view of molecular structure of **9**.

Table 1. Crystal data and structure refinement for **9**.

|                                 |                                                               |                |
|---------------------------------|---------------------------------------------------------------|----------------|
| Identification code             | Jb62                                                          |                |
| Empirical formula               | C <sub>58</sub> H <sub>54</sub> N <sub>6</sub> O <sub>8</sub> |                |
| Formula weight                  | 963.07                                                        |                |
| Temperature                     | 294(2) K                                                      |                |
| Wavelength                      | 0.71073 Å                                                     |                |
| Crystal system                  | Monoclinic                                                    |                |
| Space group                     | P 21                                                          |                |
| Unit cell dimensions            | a = 10.613(4) Å                                               | α = 90°.       |
|                                 | b = 10.186(3) Å                                               | β = 91.90(4)°. |
|                                 | c = 23.142(12) Å                                              | γ = 90°.       |
| Volume                          | 2500.4(18) Å <sup>3</sup>                                     |                |
| Z                               | 2                                                             |                |
| Density (calculated)            | 1.279 Mg/m <sup>3</sup>                                       |                |
| Absorption coefficient          | 0.086 mm <sup>-1</sup>                                        |                |
| F(000)                          | 1016                                                          |                |
| Crystal size                    | 0.46 x 0.38 x 0.33 mm <sup>3</sup>                            |                |
| Theta range for data collection | 1.76 to 25.00°.                                               |                |

|                                   |                                             |
|-----------------------------------|---------------------------------------------|
| Index ranges                      | -12<=h<=12, 0<=k<=12, 0<=l<=27              |
| Reflections collected             | 4777                                        |
| Independent reflections           | 4657 [R(int) = 0.0345]                      |
| Completeness to theta = 25.00°    | 99.7 %                                      |
| Max. and min. transmission        | 0.9721 and 0.9614                           |
| Refinement method                 | Full-matrix least-squares on F <sup>2</sup> |
| Data / restraints / parameters    | 4657 / 1 / 649                              |
| Goodness-of-fit on F <sup>2</sup> | 1.119                                       |
| Final R indices [I>2sigma(I)]     | R1 = 0.0653, wR2 = 0.1386                   |
| R indices (all data)              | R1 = 0.0968, wR2 = 0.1580                   |
| Largest diff. peak and hole       | 0.284 and -0.223 e.Å <sup>-3</sup>          |

Table 2. Atomic coordinates (x 10<sup>4</sup>) and equivalent isotropic displacement parameters (Å<sup>2</sup>x 10<sup>3</sup>) for **9**. U(eq) is defined as one third of the trace of the orthogonalized U<sup>ij</sup> tensor.

|       | x        | y         | z       | U(eq)  |
|-------|----------|-----------|---------|--------|
| N(1)  | 3046(5)  | -1063(6)  | 4727(2) | 47(1)  |
| N(25) | 1299(5)  | -1563(6)  | 5615(3) | 53(2)  |
| N(65) | 2738(5)  | -468(6)   | 3533(2) | 50(1)  |
| O(24) | -813(5)  | -1289(6)  | 5419(3) | 71(2)  |
| O(28) | 2668(5)  | -3031(6)  | 6019(2) | 62(1)  |
| O(64) | 859(6)   | -453(7)   | 3023(3) | 92(2)  |
| O(68) | 4428(4)  | 860(5)    | 3605(2) | 58(1)  |
| C(2)  | 3372(6)  | -1723(7)  | 5214(3) | 46(2)  |
| C(3)  | 4615(6)  | -1725(8)  | 5432(3) | 53(2)  |
| C(4)  | 5503(7)  | -1023(8)  | 5155(3) | 57(2)  |
| C(5)  | 5167(6)  | -306(7)   | 4660(3) | 50(2)  |
| C(6)  | 3918(6)  | -387(7)   | 4464(3) | 42(2)  |
| C(21) | 2286(6)  | -2444(7)  | 5474(3) | 50(2)  |
| C(22) | 1692(7)  | -3451(8)  | 5054(3) | 63(2)  |
| C(23) | 463(7)   | -2779(9)  | 4848(3) | 65(2)  |
| C(24) | 207(7)   | -1782(8)  | 5319(3) | 56(2)  |
| C(26) | 1394(7)  | -1149(8)  | 6215(3) | 56(2)  |
| C(27) | 2501(8)  | -2018(10) | 6443(3) | 71(2)  |
| C(29) | 1579(7)  | 297(9)    | 6315(3) | 58(2)  |
| C(30) | 971(11)  | 906(12)   | 6740(5) | 109(4) |
| C(31) | 1153(14) | 2232(13)  | 6848(6) | 145(6) |
| C(32) | 1907(11) | 2947(12)  | 6512(5) | 103(4) |
| C(33) | 2488(10) | 2349(10)  | 6076(4) | 86(3)  |
| C(34) | 2357(8)  | 1028(9)   | 5987(4) | 72(2)  |
| C(61) | 3416(6)  | 375(7)    | 3939(3) | 46(2)  |

|        |           |           |          |        |
|--------|-----------|-----------|----------|--------|
| C(62)  | 2493(6)   | 1450(8)   | 4089(3)  | 57(2)  |
| C(63)  | 1218(7)   | 913(10)   | 3876(4)  | 77(3)  |
| C(64)  | 1526(7)   | -61(8)    | 3419(3)  | 60(2)  |
| C(66)  | 3594(7)   | -982(8)   | 3100(3)  | 58(2)  |
| C(67)  | 4801(8)   | -240(9)   | 3254(3)  | 66(2)  |
| C(69)  | 3704(8)   | -2475(8)  | 3114(3)  | 64(2)  |
| C(70)  | 2824(10)  | -3237(10) | 3360(4)  | 81(3)  |
| C(71)  | 2951(11)  | -4609(11) | 3365(5)  | 100(3) |
| C(72)  | 3955(11)  | -5158(10) | 3106(5)  | 95(3)  |
| C(73)  | 4866(9)   | -4403(10) | 2876(4)  | 80(3)  |
| C(74)  | 4750(8)   | -3049(9)  | 2865(3)  | 68(2)  |
| N(1A)  | -1955(5)  | 99(6)     | 284(2)   | 43(1)  |
| N(25A) | -2020(5)  | -504(6)   | 1505(2)  | 47(1)  |
| N(65A) | -3826(5)  | 570(6)    | -606(3)  | 50(2)  |
| O(24A) | -3665(5)  | -624(7)   | 2107(2)  | 85(2)  |
| O(28A) | -355(4)   | -1838(5)  | 1397(2)  | 53(1)  |
| O(64A) | -5939(5)  | 337(6)    | -423(3)  | 71(2)  |
| O(68A) | -2517(5)  | 2013(5)   | -1019(2) | 58(1)  |
| C(2A)  | -1030(5)  | -580(7)   | 555(3)   | 39(1)  |
| C(3A)  | 175(6)    | -628(8)   | 354(3)   | 50(2)  |
| C(4A)  | 444(6)    | 71(8)     | -137(3)  | 53(2)  |
| C(5A)  | -497(6)   | 783(7)    | -414(3)  | 49(2)  |
| C(6A)  | -1685(6)  | 756(7)    | -196(3)  | 45(2)  |
| C(21A) | -1424(6)  | -1328(7)  | 1086(3)  | 45(2)  |
| C(22A) | -2398(6)  | -2400(8)  | 940(3)   | 56(2)  |
| C(23A) | -3572(8)  | -2000(11) | 1243(4)  | 87(3)  |
| C(24A) | -3147(7)  | -972(8)   | 1683(3)  | 59(2)  |
| C(26A) | -1059(7)  | 38(8)     | 1903(3)  | 52(2)  |
| C(27A) | 109(7)    | -768(8)   | 1746(3)  | 61(2)  |
| C(29A) | -908(8)   | 1510(8)   | 1862(3)  | 58(2)  |
| C(30A) | 113(9)    | 2123(9)   | 2128(4)  | 72(2)  |
| C(31A) | 232(10)   | 3480(10)  | 2115(4)  | 85(3)  |
| C(32A) | -660(10)  | 4230(10)  | 1816(4)  | 86(3)  |
| C(33A) | -1681(10) | 3623(10)  | 1555(5)  | 91(3)  |
| C(34A) | -1791(9)  | 2288(9)   | 1574(4)  | 80(3)  |
| C(61A) | -2805(6)  | 1483(7)   | -467(3)  | 48(2)  |
| C(62A) | -3374(7)  | 2484(8)   | -65(3)   | 63(2)  |
| C(63A) | -4581(7)  | 1837(9)   | 140(4)   | 67(2)  |
| C(64A) | -4906(7)  | 820(8)    | -318(3)  | 53(2)  |
| C(66A) | -3813(7)  | 145(8)    | -1205(3) | 54(2)  |
| C(67A) | -2716(8)  | 981(9)    | -1427(3) | 65(2)  |
| C(69A) | -3659(7)  | -1314(8)  | -1291(3) | 55(2)  |
| C(70A) | -4480(9)  | -1973(11) | -1650(4) | 84(3)  |
| C(71A) | -4378(12) | -3329(12) | -1737(4) | 102(4) |

|        |           |           |          |        |
|--------|-----------|-----------|----------|--------|
| C(72A) | -3428(13) | -4019(12) | -1424(5) | 104(4) |
| C(73A) | -2644(11) | -3359(10) | -1070(5) | 92(3)  |
| C(74A) | -2734(8)  | -2032(9)  | -993(4)  | 71(2)  |

Table 3. Bond lengths [Å] and angles [°] for **9**.

|              |           |               |           |
|--------------|-----------|---------------|-----------|
| N(1)-C(6)    | 1.318(8)  | C(66)-C(67)   | 1.519(11) |
| N(1)-C(2)    | 1.349(8)  | C(66)-C(69)   | 1.526(11) |
| N(25)-C(24)  | 1.345(9)  | C(69)-C(70)   | 1.353(12) |
| N(25)-C(21)  | 1.426(9)  | C(69)-C(74)   | 1.396(11) |
| N(25)-C(26)  | 1.451(9)  | C(70)-C(71)   | 1.404(14) |
| N(65)-C(64)  | 1.368(9)  | C(71)-C(72)   | 1.359(14) |
| N(65)-C(61)  | 1.447(8)  | C(72)-C(73)   | 1.358(13) |
| N(65)-C(66)  | 1.471(9)  | C(73)-C(74)   | 1.385(13) |
| O(24)-C(24)  | 1.223(9)  | N(1A)-C(2A)   | 1.340(8)  |
| O(28)-C(27)  | 1.439(10) | N(25A)-C(24A) | 1.364(9)  |
| O(28)-C(21)  | 1.442(8)  | N(25A)-C(21A) | 1.444(8)  |
| O(64)-C(64)  | 1.207(8)  | N(25A)-C(26A) | 1.459(9)  |
| O(68)-C(61)  | 1.431(8)  | N(65A)-C(64A) | 1.370(8)  |
| O(68)-C(67)  | 1.447(9)  | N(65A)-C(66A) | 1.454(9)  |
| C(2)-C(3)    | 1.396(9)  | N(65A)-C(61A) | 1.455(9)  |
| C(2)-C(21)   | 1.508(9)  | O(24A)-C(24A) | 1.195(8)  |
| C(3)-C(4)    | 1.360(10) | O(28A)-C(21A) | 1.421(8)  |
| C(4)-C(5)    | 1.395(9)  | O(28A)-C(27A) | 1.434(9)  |
| C(5)-C(6)    | 1.389(8)  | O(64A)-C(64A) | 1.219(8)  |
| C(6)-C(61)   | 1.524(9)  | O(68A)-C(67A) | 1.424(10) |
| C(6A)-N(1A)  | 1.336(8)  | O(68A)-C(61A) | 1.429(8)  |
| C(6A)-C(5A)  | 1.372(9)  | C(2A)-C(3A)   | 1.376(8)  |
| C(6A)-C(61A) | 1.518(9)  | C(2A)-C(21A)  | 1.516(9)  |
| C(21)-C(22)  | 1.534(10) | C(3A)-C(4A)   | 1.379(9)  |
| C(22)-C(23)  | 1.534(10) | C(4A)-C(5A)   | 1.376(9)  |
| C(23)-C(24)  | 1.522(11) | C(21A)-C(22A) | 1.533(9)  |
| C(26)-C(29)  | 1.503(11) | C(22A)-C(23A) | 1.506(10) |
| C(26)-C(27)  | 1.550(12) | C(23A)-C(24A) | 1.517(12) |
| C(29)-C(30)  | 1.346(12) | C(26A)-C(29A) | 1.511(11) |
| C(29)-C(34)  | 1.362(11) | C(26A)-C(27A) | 1.540(10) |
| C(30)-C(31)  | 1.386(16) | C(29A)-C(30A) | 1.377(11) |
| C(31)-C(32)  | 1.348(15) | C(29A)-C(34A) | 1.382(12) |
| C(32)-C(33)  | 1.346(14) | C(30A)-C(31A) | 1.388(13) |
| C(33)-C(34)  | 1.368(13) | C(31A)-C(32A) | 1.384(13) |
| C(61)-C(62)  | 1.517(10) | C(32A)-C(33A) | 1.370(13) |
| C(62)-C(63)  | 1.526(10) | C(33A)-C(34A) | 1.365(13) |
| C(63)-C(64)  | 1.494(11) | C(61A)-C(62A) | 1.519(10) |

|                    |           |                      |           |
|--------------------|-----------|----------------------|-----------|
| C(62A)-C(63A)      | 1.530(10) | N(25)-C(26)-C(27)    | 100.8(6)  |
| C(63A)-C(64A)      | 1.514(11) | C(29)-C(26)-C(27)    | 114.4(7)  |
| C(66A)-C(69A)      | 1.509(11) | O(28)-C(27)-C(26)    | 106.6(6)  |
| C(66A)-C(67A)      | 1.543(11) | C(30)-C(29)-C(34)    | 118.0(9)  |
| C(69A)-C(70A)      | 1.361(11) | C(30)-C(29)-C(26)    | 120.1(9)  |
| C(69A)-C(74A)      | 1.388(11) | C(34)-C(29)-C(26)    | 121.9(8)  |
| C(70A)-C(71A)      | 1.401(15) | C(29)-C(30)-C(31)    | 120.9(11) |
| C(71A)-C(72A)      | 1.409(15) | C(32)-C(31)-C(30)    | 120.3(11) |
| C(72A)-C(73A)      | 1.331(15) | C(33)-C(32)-C(31)    | 119.0(11) |
| C(73A)-C(74A)      | 1.367(13) | C(32)-C(33)-C(34)    | 120.7(10) |
|                    |           | C(29)-C(34)-C(33)    | 121.0(9)  |
| C(6)-N(1)-C(2)     | 118.8(6)  | O(68)-C(61)-N(65)    | 102.7(5)  |
| C(24)-N(25)-C(21)  | 114.0(6)  | O(68)-C(61)-C(62)    | 112.1(6)  |
| C(24)-N(25)-C(26)  | 124.5(6)  | N(65)-C(61)-C(62)    | 105.4(5)  |
| C(21)-N(25)-C(26)  | 112.0(6)  | O(68)-C(61)-C(6)     | 111.0(5)  |
| C(64)-N(65)-C(61)  | 112.9(6)  | N(65)-C(61)-C(6)     | 111.7(6)  |
| C(64)-N(65)-C(66)  | 125.0(6)  | C(62)-C(61)-C(6)     | 113.3(6)  |
| C(61)-N(65)-C(66)  | 110.4(6)  | C(61)-C(62)-C(63)    | 103.9(6)  |
| C(27)-O(28)-C(21)  | 105.2(6)  | C(64)-C(63)-C(62)    | 104.7(6)  |
| C(61)-O(68)-C(67)  | 105.1(5)  | O(64)-C(64)-N(65)    | 124.7(8)  |
| N(1)-C(2)-C(3)     | 121.0(6)  | O(64)-C(64)-C(63)    | 128.4(7)  |
| N(1)-C(2)-C(21)    | 113.4(6)  | N(65)-C(64)-C(63)    | 106.9(6)  |
| C(3)-C(2)-C(21)    | 125.6(6)  | N(65)-C(66)-C(67)    | 101.4(6)  |
| C(4)-C(3)-C(2)     | 119.4(7)  | N(65)-C(66)-C(69)    | 112.8(7)  |
| C(3)-C(4)-C(5)     | 119.9(7)  | C(67)-C(66)-C(69)    | 115.3(7)  |
| C(6)-C(5)-C(4)     | 116.9(7)  | O(68)-C(67)-C(66)    | 105.8(6)  |
| N(1)-C(6)-C(5)     | 123.9(6)  | C(70)-C(69)-C(74)    | 120.2(9)  |
| N(1)-C(6)-C(61)    | 113.7(5)  | C(70)-C(69)-C(66)    | 121.8(8)  |
| C(5)-C(6)-C(61)    | 122.3(6)  | C(74)-C(69)-C(66)    | 118.0(8)  |
| N(1A)-C(6A)-C(5A)  | 122.6(6)  | C(69)-C(70)-C(71)    | 120.5(10) |
| N(1A)-C(6A)-C(61A) | 113.6(5)  | C(72)-C(71)-C(70)    | 118.8(11) |
| C(5A)-C(6A)-C(61A) | 123.7(6)  | C(73)-C(72)-C(71)    | 121.2(10) |
| N(25)-C(21)-O(28)  | 104.4(6)  | C(72)-C(73)-C(74)    | 120.5(10) |
| N(25)-C(21)-C(2)   | 111.2(6)  | C(73)-C(74)-C(69)    | 118.7(9)  |
| O(28)-C(21)-C(2)   | 110.7(5)  | C(6A)-N(1A)-C(2A)    | 118.3(5)  |
| N(25)-C(21)-C(22)  | 106.0(6)  | C(24A)-N(25A)-C(21A) | 114.0(6)  |
| O(28)-C(21)-C(22)  | 112.0(6)  | C(24A)-N(25A)-C(26A) | 122.9(6)  |
| C(2)-C(21)-C(22)   | 112.2(6)  | C(21A)-N(25A)-C(26A) | 109.4(5)  |
| C(21)-C(22)-C(23)  | 103.1(6)  | C(64A)-N(65A)-C(66A) | 123.7(6)  |
| C(24)-C(23)-C(22)  | 104.2(6)  | C(64A)-N(65A)-C(61A) | 113.7(6)  |
| O(24)-C(24)-N(25)  | 126.1(8)  | C(66A)-N(65A)-C(61A) | 111.7(5)  |
| O(24)-C(24)-C(23)  | 126.1(7)  | C(21A)-O(28A)-C(27A) | 105.1(5)  |
| N(25)-C(24)-C(23)  | 107.7(7)  | C(67A)-O(68A)-C(61A) | 106.3(6)  |
| N(25)-C(26)-C(29)  | 115.9(7)  | N(1A)-C(2A)-C(3A)    | 122.4(6)  |

|                      |           |                      |           |
|----------------------|-----------|----------------------|-----------|
| N(1A)-C(2A)-C(21A)   | 114.9(5)  | C(34A)-C(33A)-C(32A) | 120.2(10) |
| C(3A)-C(2A)-C(21A)   | 122.7(6)  | C(33A)-C(34A)-C(29A) | 122.0(10) |
| C(2A)-C(3A)-C(4A)    | 118.6(7)  | O(68A)-C(61A)-N(65A) | 103.0(5)  |
| C(5A)-C(4A)-C(3A)    | 119.3(6)  | O(68A)-C(61A)-C(6A)  | 111.4(5)  |
| C(6A)-C(5A)-C(4A)    | 118.7(6)  | N(65A)-C(61A)-C(6A)  | 110.3(6)  |
| O(28A)-C(21A)-N(25A) | 103.4(5)  | O(68A)-C(61A)-C(62A) | 113.2(6)  |
| O(28A)-C(21A)-C(2A)  | 110.9(5)  | N(65A)-C(61A)-C(62A) | 104.8(5)  |
| N(25A)-C(21A)-C(2A)  | 113.0(5)  | C(6A)-C(61A)-C(62A)  | 113.3(6)  |
| O(28A)-C(21A)-C(22A) | 111.8(6)  | C(61A)-C(62A)-C(63A) | 104.8(6)  |
| N(25A)-C(21A)-C(22A) | 104.7(5)  | C(64A)-C(63A)-C(62A) | 104.5(6)  |
| C(2A)-C(21A)-C(22A)  | 112.4(6)  | O(64A)-C(64A)-N(65A) | 126.1(7)  |
| C(23A)-C(22A)-C(21A) | 105.5(6)  | O(64A)-C(64A)-C(63A) | 126.8(7)  |
| C(22A)-C(23A)-C(24A) | 105.5(7)  | N(65A)-C(64A)-C(63A) | 107.0(6)  |
| O(24A)-C(24A)-N(25A) | 125.2(8)  | N(65A)-C(66A)-C(69A) | 115.0(6)  |
| O(24A)-C(24A)-C(23A) | 128.4(8)  | N(65A)-C(66A)-C(67A) | 100.6(6)  |
| N(25A)-C(24A)-C(23A) | 106.5(6)  | C(69A)-C(66A)-C(67A) | 114.4(7)  |
| N(25A)-C(26A)-C(29A) | 114.2(7)  | O(68A)-C(67A)-C(66A) | 106.5(6)  |
| N(25A)-C(26A)-C(27A) | 101.5(6)  | C(70A)-C(69A)-C(74A) | 118.1(9)  |
| C(29A)-C(26A)-C(27A) | 115.2(7)  | C(70A)-C(69A)-C(66A) | 119.7(8)  |
| O(28A)-C(27A)-C(26A) | 105.9(6)  | C(74A)-C(69A)-C(66A) | 122.2(8)  |
| C(30A)-C(29A)-C(34A) | 117.8(8)  | C(69A)-C(70A)-C(71A) | 121.5(11) |
| C(30A)-C(29A)-C(26A) | 120.4(8)  | C(70A)-C(71A)-C(72A) | 118.4(10) |
| C(34A)-C(29A)-C(26A) | 121.8(8)  | C(73A)-C(72A)-C(71A) | 119.1(11) |
| C(29A)-C(30A)-C(31A) | 120.8(10) | C(72A)-C(73A)-C(74A) | 122.3(11) |
| C(32A)-C(31A)-C(30A) | 120.0(10) | C(73A)-C(74A)-C(69A) | 120.5(10) |
| C(33A)-C(32A)-C(31A) | 119.2(10) |                      |           |

Table 4. Anisotropic displacement parameters ( $\text{\AA}^2 \times 10^3$ ) for **9**. The anisotropic displacement factor exponent takes the form:  $-2\pi^2 [h^2 a^{*2} U^{11} + \dots + 2 h k a^* b^* U^{12}]$

|       | U <sup>11</sup> | U <sup>22</sup> | U <sup>33</sup> | U <sup>23</sup> | U <sup>13</sup> | U <sup>12</sup> |
|-------|-----------------|-----------------|-----------------|-----------------|-----------------|-----------------|
| N(1)  | 41(3)           | 46(3)           | 53(3)           | -1(3)           | -3(3)           | -2(3)           |
| N(25) | 45(3)           | 48(4)           | 67(4)           | -3(3)           | 2(3)            | -11(3)          |
| N(65) | 56(4)           | 52(4)           | 41(3)           | -7(3)           | -11(3)          | 5(3)            |
| O(24) | 50(3)           | 68(4)           | 95(4)           | 7(3)            | 3(3)            | 8(3)            |
| O(28) | 67(3)           | 57(3)           | 61(3)           | 11(3)           | -4(3)           | 2(3)            |
| O(64) | 89(4)           | 97(5)           | 87(4)           | -18(4)          | -50(3)          | 8(4)            |
| O(68) | 62(3)           | 58(3)           | 52(3)           | 1(3)            | 5(2)            | -7(3)           |
| C(2)  | 47(4)           | 45(4)           | 46(4)           | -1(3)           | -6(3)           | -2(3)           |
| C(3)  | 43(4)           | 54(5)           | 60(4)           | 8(4)            | -12(3)          | -1(4)           |
| C(4)  | 46(4)           | 58(5)           | 67(5)           | 8(4)            | -10(3)          | -3(4)           |

|        |         |       |         |        |        |         |
|--------|---------|-------|---------|--------|--------|---------|
| C(5)   | 43(4)   | 51(4) | 55(4)   | 3(4)   | 2(3)   | 1(3)    |
| C(6)   | 44(4)   | 42(4) | 38(3)   | -5(3)  | -1(3)  | -4(3)   |
| C(6A)  | 53(4)   | 38(4) | 45(4)   | -4(3)  | 11(3)  | -1(3)   |
| C(21)  | 53(4)   | 46(4) | 51(4)   | 2(3)   | -7(3)  | 3(4)    |
| C(22)  | 66(5)   | 52(5) | 70(5)   | -8(4)  | -2(4)  | -12(4)  |
| C(23)  | 56(5)   | 72(6) | 66(5)   | -4(5)  | -13(4) | -11(4)  |
| C(24)  | 53(5)   | 51(4) | 63(5)   | 11(4)  | -3(4)  | -11(4)  |
| C(26)  | 60(5)   | 57(5) | 52(4)   | -1(4)  | 7(4)   | -13(4)  |
| C(27)  | 86(6)   | 78(6) | 51(5)   | 9(5)   | -3(4)  | -4(5)   |
| C(29)  | 52(4)   | 70(5) | 53(4)   | -10(4) | 1(4)   | -8(4)   |
| C(30)  | 123(9)  | 99(9) | 109(8)  | -35(7) | 49(7)  | -26(8)  |
| C(31)  | 197(15) | 91(9) | 153(12) | -60(9) | 92(11) | -31(10) |
| C(32)  | 125(10) | 74(7) | 111(9)  | -24(7) | 13(7)  | -10(7)  |
| C(33)  | 98(8)   | 72(7) | 88(7)   | -10(6) | 10(6)  | -22(6)  |
| C(34)  | 71(6)   | 72(6) | 75(6)   | -12(5) | 16(4)  | -24(5)  |
| C(61)  | 53(4)   | 43(4) | 40(4)   | -6(3)  | -4(3)  | -5(3)   |
| C(62)  | 61(5)   | 52(4) | 55(4)   | -6(4)  | -16(3) | 7(4)    |
| C(63)  | 53(5)   | 79(6) | 97(6)   | -20(6) | -18(4) | 15(5)   |
| C(64)  | 55(4)   | 71(6) | 53(4)   | 0(4)   | -19(4) | 2(4)    |
| C(66)  | 68(5)   | 65(5) | 43(4)   | -1(4)  | 7(4)   | 0(4)    |
| C(67)  | 75(5)   | 68(6) | 55(4)   | -6(4)  | 14(4)  | 1(5)    |
| C(69)  | 78(6)   | 57(5) | 58(5)   | -6(4)  | 8(4)   | 5(5)    |
| C(70)  | 94(7)   | 68(6) | 81(6)   | -3(5)  | 21(5)  | 6(5)    |
| C(71)  | 122(9)  | 68(7) | 110(9)  | -12(6) | 16(7)  | 0(7)    |
| C(72)  | 133(10) | 55(6) | 95(7)   | -11(6) | -7(7)  | 4(6)    |
| C(73)  | 86(7)   | 80(7) | 75(6)   | -18(5) | -6(5)  | 12(6)   |
| C(74)  | 74(6)   | 69(6) | 60(5)   | -10(4) | 4(4)   | 2(5)    |
| N(1A)  | 37(3)   | 50(3) | 43(3)   | -2(3)  | 1(2)   | -5(3)   |
| N(25A) | 51(3)   | 49(3) | 41(3)   | -2(3)  | 10(2)  | 2(3)    |
| N(65A) | 41(3)   | 50(4) | 60(4)   | 0(3)   | 4(3)   | 6(3)    |
| O(24A) | 88(4)   | 90(5) | 79(4)   | -4(4)  | 50(3)  | 5(4)    |
| O(28A) | 56(3)   | 52(3) | 51(3)   | 1(2)   | -2(2)  | 13(3)   |
| O(64A) | 47(3)   | 68(4) | 98(4)   | 7(3)   | 3(3)   | -5(3)   |
| O(68A) | 66(3)   | 52(3) | 56(3)   | 13(3)  | 4(2)   | -7(3)   |
| C(2A)  | 37(3)   | 43(4) | 39(3)   | -9(3)  | 7(3)   | 2(3)    |
| C(3A)  | 38(4)   | 56(4) | 57(4)   | -4(4)  | 8(3)   | -3(3)   |
| C(4A)  | 38(4)   | 62(5) | 58(4)   | 4(4)   | 11(3)  | 3(4)    |
| C(5A)  | 50(4)   | 47(4) | 50(4)   | 9(4)   | 15(3)  | 7(4)    |
| C(21A) | 45(4)   | 45(4) | 47(4)   | -2(3)  | 8(3)   | 4(3)    |
| C(22A) | 56(4)   | 51(5) | 62(5)   | -2(4)  | 9(4)   | -10(4)  |
| C(23A) | 70(6)   | 91(7) | 102(7)  | -27(6) | 34(5)  | -13(5)  |
| C(24A) | 51(4)   | 65(5) | 63(5)   | 0(4)   | 21(4)  | 4(4)    |
| C(26A) | 57(4)   | 61(5) | 38(4)   | -5(3)  | 3(3)   | 0(4)    |
| C(27A) | 60(5)   | 65(5) | 56(4)   | -13(4) | 0(4)   | 5(4)    |



|        |         |       |        |        |        |        |
|--------|---------|-------|--------|--------|--------|--------|
| C(29A) | 72(5)   | 56(5) | 47(4)  | -10(4) | 7(4)   | -8(4)  |
| C(30A) | 86(6)   | 68(6) | 62(5)  | 0(5)   | -5(5)  | -5(5)  |
| C(31A) | 100(7)  | 77(7) | 78(6)  | -19(6) | 5(5)   | -27(6) |
| C(32A) | 124(9)  | 63(6) | 71(6)  | 2(5)   | 6(6)   | -12(6) |
| C(33A) | 97(8)   | 62(6) | 112(8) | 6(6)   | -17(6) | 0(6)   |
| C(34A) | 93(7)   | 57(6) | 89(7)  | 5(5)   | -15(5) | 3(5)   |
| C(61A) | 44(4)   | 46(4) | 54(4)  | 1(4)   | 5(3)   | -1(3)  |
| C(62A) | 70(5)   | 55(5) | 66(5)  | -9(4)  | 5(4)   | 8(4)   |
| C(63A) | 59(5)   | 64(5) | 80(6)  | 0(5)   | 18(4)  | 9(4)   |
| C(64A) | 49(4)   | 49(4) | 60(5)  | 12(4)  | 7(3)   | 7(4)   |
| C(66A) | 51(4)   | 60(5) | 52(4)  | 1(4)   | -6(3)  | 1(4)   |
| C(67A) | 76(6)   | 67(5) | 52(5)  | 4(4)   | 2(4)   | -4(5)  |
| C(69A) | 53(4)   | 58(5) | 53(4)  | -1(4)  | 3(4)   | -7(4)  |
| C(70A) | 89(7)   | 85(7) | 78(6)  | 1(6)   | -14(5) | -13(6) |
| C(71A) | 141(10) | 92(9) | 74(7)  | -22(6) | -1(7)  | -44(8) |
| C(72A) | 145(11) | 69(7) | 102(9) | -14(7) | 37(8)  | -1(8)  |
| C(73A) | 105(8)  | 60(7) | 112(9) | -8(6)  | 14(7)  | 23(6)  |
| C(74A) | 73(6)   | 73(6) | 65(5)  | -15(5) | 3(4)   | 18(5)  |

---

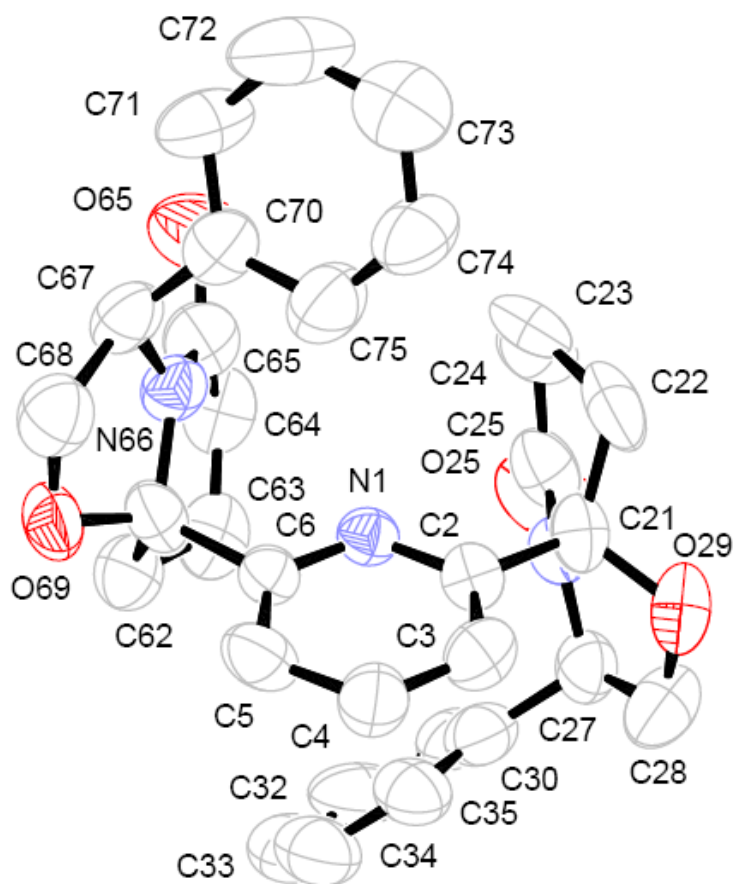

**Fig S2** ORTEP view of molecular structure of **10**.

Table 1. Crystal data and structure refinement for **10**.

|                        |                                                                                                                                                    |
|------------------------|----------------------------------------------------------------------------------------------------------------------------------------------------|
| Identification code    | Jb61                                                                                                                                               |
| Empirical formula      | C <sub>62</sub> H <sub>64</sub> N <sub>6</sub> O <sub>9</sub> (2 C <sub>31</sub> H <sub>31</sub> N <sub>3</sub> O <sub>4</sub> · H <sub>2</sub> O) |
| Formula weight         | 1037.19                                                                                                                                            |
| Temperature            | 294(2) K                                                                                                                                           |
| Wavelength             | 0.71073 Å                                                                                                                                          |
| Crystal system         | Orthorhombic                                                                                                                                       |
| Space group            | P 21 21 21                                                                                                                                         |
| Unit cell dimensions   | a = 9.102(2) Å                      α = 90°.<br>b = 18.341(5) Å                     β = 90°.<br>c = 32.012(8) Å                    γ = 90°.        |
| Volume                 | 5344(2) Å <sup>3</sup>                                                                                                                             |
| Z                      | 4                                                                                                                                                  |
| Density (calculated)   | 1.289 Mg/m <sup>3</sup>                                                                                                                            |
| Absorption coefficient | 0.087 mm <sup>-1</sup>                                                                                                                             |
| F(000)                 | 2200                                                                                                                                               |

|                                   |                                             |
|-----------------------------------|---------------------------------------------|
| Crystal size                      | 0.47 x 0.36 x 0.22 mm <sup>3</sup>          |
| Theta range for data collection   | 2.22 to 25.72°                              |
| Index ranges                      | -11<=h<=0, -22<=k<=0, 0<=l<=38              |
| Reflections collected             | 5627                                        |
| Independent reflections           | 5627                                        |
| Completeness to theta = 25.72°    | 99.0 %                                      |
| Max. and min. transmission        | 0.9811 and 0.9602                           |
| Refinement method                 | Full-matrix least-squares on F <sup>2</sup> |
| Data / restraints / parameters    | 5627 / 3 / 701                              |
| Goodness-of-fit on F <sup>2</sup> | 1.088                                       |
| Final R indices [I>2sigma(I)]     | R1 = 0.1037, wR2 = 0.2595                   |
| R indices (all data)              | R1 = 0.2333, wR2 = 0.3356                   |
| Extinction coefficient            | 0.009(2)                                    |
| Largest diff. peak and hole       | 0.536 and -0.648 e.Å <sup>-3</sup>          |

Table 2. Atomic coordinates ( x 10<sup>4</sup>) and equivalent isotropic displacement parameters (Å<sup>2</sup>x 10<sup>3</sup>) for **10**. U(eq) is defined as one third of the trace of the orthogonalized U<sup>ij</sup> tensor.

|        | x         | y       | z        | U(eq)  |
|--------|-----------|---------|----------|--------|
| C(2)   | 3931(11)  | 5493(5) | 8203(3)  | 52(2)  |
| C(2A)  | 8164(11)  | 4858(5) | 10671(3) | 56(2)  |
| C(3)   | 5336(11)  | 5217(6) | 8296(3)  | 61(3)  |
| C(3A)  | 9682(12)  | 4884(7) | 10692(4) | 86(4)  |
| C(4)   | 6012(12)  | 4773(6) | 8018(3)  | 67(3)  |
| C(4A)  | 10463(13) | 5100(9) | 10340(5) | 107(5) |
| C(5)   | 5242(11)  | 4549(7) | 7661(3)  | 68(3)  |
| C(5A)  | 9737(13)  | 5182(8) | 9970(5)  | 91(4)  |
| C(6)   | 3832(10)  | 4820(5) | 7612(3)  | 48(2)  |
| C(6A)  | 8210(10)  | 5107(5) | 9959(3)  | 55(2)  |
| C(21)  | 3151(13)  | 6027(5) | 8484(3)  | 60(3)  |
| C(21A) | 7219(11)  | 4691(5) | 11042(3) | 61(3)  |
| C(22)  | 1949(16)  | 5697(6) | 8747(3)  | 86(4)  |
| C(22A) | 6707(14)  | 3960(6) | 11056(4) | 79(3)  |
| C(23)  | 577(14)   | 5561(9) | 8488(4)  | 93(4)  |
| C(23A) | 5534(14)  | 3816(7) | 10728(4) | 79(3)  |
| C(24)  | -7(15)    | 6230(8) | 8318(4)  | 91(4)  |
| C(24A) | 4246(12)  | 4330(6) | 10788(4) | 66(3)  |
| C(25)  | 1104(15)  | 6761(8) | 8157(4)  | 82(4)  |
| C(25A) | 4569(12)  | 5059(7) | 10925(3) | 62(3)  |
| C(27)  | 3714(13)  | 7167(6) | 8142(3)  | 70(3)  |
| C(27A) | 6343(12)  | 5910(6) | 11261(3) | 66(3)  |
| C(28)  | 4818(16)  | 6966(7) | 8486(4)  | 91(4)  |

|        |          |          |          |        |
|--------|----------|----------|----------|--------|
| C(28A) | 7724(15) | 5645(7)  | 11507(4) | 86(4)  |
| C(30)  | 4248(13) | 7136(6)  | 7693(4)  | 76(3)  |
| C(30A) | 6469(14) | 6567(7)  | 10979(4) | 73(3)  |
| C(31)  | 3623(14) | 7647(6)  | 7418(3)  | 78(3)  |
| C(31A) | 5318(17) | 7015(7)  | 10936(5) | 90(4)  |
| C(32)  | 4054(16) | 7613(10) | 6995(5)  | 111(5) |
| C(32A) | 5430(30) | 7615(9)  | 10650(7) | 132(7) |
| C(33)  | 5117(19) | 7088(9)  | 6859(5)  | 106(5) |
| C(33A) | 6650(30) | 7754(10) | 10416(6) | 124(6) |
| C(34)  | 5756(16) | 6630(7)  | 7133(5)  | 98(4)  |
| C(34A) | 7790(20) | 7254(8)  | 10474(5) | 110(5) |
| C(35)  | 5324(14) | 6632(6)  | 7549(4)  | 78(3)  |
| C(35A) | 7737(17) | 6711(7)  | 10755(4) | 86(4)  |
| C(61)  | 2837(11) | 4548(6)  | 7254(3)  | 63(3)  |
| C(61A) | 7315(11) | 5213(6)  | 9567(3)  | 60(3)  |
| C(62)  | 2732(14) | 5104(7)  | 6912(3)  | 78(3)  |
| C(62A) | 6667(13) | 5975(6)  | 9551(3)  | 69(3)  |
| C(63)  | 1765(16) | 5735(6)  | 7047(3)  | 85(4)  |
| C(63A) | 5386(12) | 6053(6)  | 9863(3)  | 68(3)  |
| C(64)  | 217(14)  | 5502(6)  | 7176(4)  | 81(4)  |
| C(64A) | 4236(12) | 5532(5)  | 9767(4)  | 68(3)  |
| C(65)  | 130(15)  | 4783(7)  | 7372(4)  | 79(3)  |
| C(65A) | 4705(13) | 4777(6)  | 9603(3)  | 61(3)  |
| C(67)  | 1294(12) | 3570(6)  | 7523(4)  | 68(3)  |
| C(67A) | 6678(14) | 4035(6)  | 9271(3)  | 71(3)  |
| C(68)  | 2727(14) | 3297(6)  | 7337(4)  | 80(3)  |
| C(68A) | 8187(17) | 4340(8)  | 9151(4)  | 101(5) |
| C(70)  | 1101(12) | 3388(6)  | 7979(3)  | 65(3)  |
| C(70A) | 6669(14) | 3330(6)  | 9458(3)  | 69(3)  |
| C(71)  | -4(14)   | 2947(7)  | 8095(4)  | 84(4)  |
| C(71A) | 5883(16) | 2756(7)  | 9288(4)  | 96(4)  |
| C(72)  | -203(17) | 2765(10) | 8504(6)  | 125(6) |
| C(72A) | 5933(17) | 2070(7)  | 9450(6)  | 101(5) |
| C(73)  | 692(17)  | 3055(7)  | 8811(5)  | 92(4)  |
| C(73A) | 6743(16) | 1944(7)  | 9780(5)  | 91(4)  |
| C(74)  | 1817(15) | 3475(6)  | 8697(4)  | 83(4)  |
| C(74A) | 7548(16) | 2445(9)  | 9969(5)  | 93(4)  |
| C(75)  | 1993(15) | 3670(7)  | 8287(4)  | 84(4)  |
| C(75A) | 7500(15) | 3137(7)  | 9804(4)  | 89(4)  |
| N(1)   | 3182(8)  | 5265(4)  | 7870(2)  | 48(2)  |
| N(1A)  | 7452(8)  | 4957(4)  | 10306(2) | 50(2)  |
| N(26)  | 2553(10) | 6625(4)  | 8224(2)  | 57(2)  |
| N(26A) | 5932(9)  | 5220(4)  | 11052(2) | 56(2)  |
| N(66)  | 1361(9)  | 4354(5)  | 7412(3)  | 60(2)  |

|        |           |          |          |        |
|--------|-----------|----------|----------|--------|
| N(66A) | 6144(10)  | 4665(4)  | 9533(2)  | 56(2)  |
| O(1W)  | 1353(13)  | 6498(10) | 11200(4) | 160(5) |
| O(25)  | 776(11)   | 7358(7)  | 7984(3)  | 128(4) |
| O(25A) | 3587(8)   | 5516(5)  | 10932(3) | 83(2)  |
| O(29)  | 4182(10)  | 6412(4)  | 8740(2)  | 78(2)  |
| O(29A) | 7931(10)  | 4882(5)  | 11424(2) | 91(3)  |
| O(65)  | -1067(10) | 4504(7)  | 7479(3)  | 112(3) |
| O(65A) | 3771(10)  | 4306(5)  | 9522(3)  | 92(3)  |
| O(69)  | 3324(8)   | 3881(4)  | 7082(2)  | 71(2)  |
| O(69A) | 8158(10)  | 5109(4)  | 9203(2)  | 85(2)  |

---

Table 3. Bond lengths [Å] and angles [°] for **10**.

|               |           |               |           |
|---------------|-----------|---------------|-----------|
| C(2)-N(1)     | 1.335(12) | C(25A)-O(25A) | 1.224(13) |
| C(2)-C(3)     | 1.407(14) | C(25A)-N(26A) | 1.338(13) |
| C(2)-C(21)    | 1.506(13) | C(27)-N(26)   | 1.474(13) |
| C(2A)-N(1A)   | 1.347(12) | C(27)-C(30)   | 1.517(16) |
| C(2A)-C(3A)   | 1.384(15) | C(27)-C(28)   | 1.536(17) |
| C(2A)-C(21A)  | 1.499(14) | C(27A)-N(26A) | 1.479(13) |
| C(3)-C(4)     | 1.353(14) | C(27A)-C(30A) | 1.509(16) |
| C(3A)-C(4A)   | 1.390(19) | C(27A)-C(28A) | 1.562(16) |
| C(4)-C(5)     | 1.403(14) | C(28)-O(29)   | 1.423(14) |
| C(4A)-C(5A)   | 1.367(19) | C(28A)-O(29A) | 1.436(14) |
| C(5)-C(6)     | 1.385(14) | C(30)-C(31)   | 1.407(16) |
| C(5A)-C(6A)   | 1.397(15) | C(30)-C(35)   | 1.424(16) |
| C(6)-N(1)     | 1.303(11) | C(30A)-C(31A) | 1.337(17) |
| C(6)-C(61)    | 1.542(14) | C(30A)-C(35A) | 1.384(17) |
| C(6A)-N(1A)   | 1.338(12) | C(31)-C(32)   | 1.411(19) |
| C(6A)-C(61A)  | 1.507(14) | C(31A)-C(32A) | 1.44(2)   |
| C(21)-O(29)   | 1.432(13) | C(32)-C(33)   | 1.43(2)   |
| C(21)-N(26)   | 1.480(12) | C(32A)-C(33A) | 1.37(3)   |
| C(21)-C(22)   | 1.508(16) | C(33)-C(34)   | 1.346(19) |
| C(21A)-C(22A) | 1.419(15) | C(33A)-C(34A) | 1.39(2)   |
| C(21A)-O(29A) | 1.427(13) | C(34)-C(35)   | 1.390(18) |
| C(21A)-N(26A) | 1.522(13) | C(34A)-C(35A) | 1.343(19) |
| C(22)-C(23)   | 1.519(18) | C(61)-O(69)   | 1.414(12) |
| C(22A)-C(23A) | 1.520(16) | C(61)-N(66)   | 1.479(13) |
| C(23)-C(24)   | 1.445(19) | C(61)-C(62)   | 1.498(15) |
| C(23A)-C(24A) | 1.517(16) | C(61A)-O(69A) | 1.410(12) |
| C(24)-C(25)   | 1.495(18) | C(61A)-N(66A) | 1.469(13) |
| C(24A)-C(25A) | 1.438(15) | C(61A)-C(62A) | 1.517(15) |
| C(25)-O(25)   | 1.265(15) | C(62)-C(63)   | 1.518(16) |
| C(25)-N(26)   | 1.358(15) | C(62A)-C(63A) | 1.541(16) |

|                    |           |                      |           |
|--------------------|-----------|----------------------|-----------|
| C(63)-C(64)        | 1.529(18) | N(1A)-C(6A)-C(5A)    | 120.9(11) |
| C(63A)-C(64A)      | 1.451(14) | N(1A)-C(6A)-C(61A)   | 116.1(8)  |
| C(64)-C(65)        | 1.461(17) | C(5A)-C(6A)-C(61A)   | 123.0(11) |
| C(64A)-C(65A)      | 1.541(15) | O(29)-C(21)-N(26)    | 101.4(7)  |
| C(65)-O(65)        | 1.252(16) | O(29)-C(21)-C(2)     | 110.6(9)  |
| C(65)-N(66)        | 1.376(15) | N(26)-C(21)-C(2)     | 108.8(8)  |
| C(65A)-O(65A)      | 1.240(12) | O(29)-C(21)-C(22)    | 110.7(9)  |
| C(65A)-N(66A)      | 1.345(14) | N(26)-C(21)-C(22)    | 110.1(10) |
| C(67)-N(66)        | 1.482(13) | C(2)-C(21)-C(22)     | 114.4(9)  |
| C(67)-C(70)        | 1.508(15) | C(22A)-C(21A)-O(29A) | 110.8(9)  |
| C(67)-C(68)        | 1.520(16) | C(22A)-C(21A)-C(2A)  | 114.0(9)  |
| C(67A)-C(70A)      | 1.423(15) | O(29A)-C(21A)-C(2A)  | 111.6(8)  |
| C(67A)-N(66A)      | 1.509(13) | C(22A)-C(21A)-N(26A) | 110.4(9)  |
| C(67A)-C(68A)      | 1.532(19) | O(29A)-C(21A)-N(26A) | 100.0(8)  |
| C(68)-O(69)        | 1.452(13) | C(2A)-C(21A)-N(26A)  | 109.2(8)  |
| C(68A)-O(69A)      | 1.421(15) | C(21)-C(22)-C(23)    | 111.1(9)  |
| C(70)-C(71)        | 1.342(15) | C(21A)-C(22A)-C(23A) | 112.0(10) |
| C(70)-C(75)        | 1.376(15) | C(24)-C(23)-C(22)    | 111.6(12) |
| C(70A)-C(75A)      | 1.387(17) | C(24A)-C(23A)-C(22A) | 110.3(9)  |
| C(70A)-C(71A)      | 1.385(17) | C(23)-C(24)-C(25)    | 115.7(12) |
| C(71)-C(72)        | 1.36(2)   | C(25A)-C(24A)-C(23A) | 117.4(9)  |
| C(71A)-C(72A)      | 1.360(18) | O(25)-C(25)-N(26)    | 117.2(13) |
| C(72)-C(73)        | 1.38(2)   | O(25)-C(25)-C(24)    | 123.7(13) |
| C(72A)-C(73A)      | 1.308(19) | N(26)-C(25)-C(24)    | 119.0(12) |
| C(73)-C(74)        | 1.333(18) | O(25A)-C(25A)-N(26A) | 121.4(10) |
| C(73A)-C(74A)      | 1.32(2)   | O(25A)-C(25A)-C(24A) | 119.5(9)  |
| C(74)-C(75)        | 1.370(16) | N(26A)-C(25A)-C(24A) | 119.1(11) |
| C(74A)-C(75A)      | 1.38(2)   | N(26)-C(27)-C(30)    | 111.9(9)  |
|                    |           | N(26)-C(27)-C(28)    | 100.3(9)  |
| N(1)-C(2)-C(3)     | 121.3(9)  | C(30)-C(27)-C(28)    | 117.4(11) |
| N(1)-C(2)-C(21)    | 116.1(8)  | N(26A)-C(27A)-C(30A) | 115.7(8)  |
| C(3)-C(2)-C(21)    | 122.5(9)  | N(26A)-C(27A)-C(28A) | 99.5(8)   |
| N(1A)-C(2A)-C(3A)  | 121.3(11) | C(30A)-C(27A)-C(28A) | 119.3(10) |
| N(1A)-C(2A)-C(21A) | 116.0(8)  | O(29)-C(28)-C(27)    | 108.3(10) |
| C(3A)-C(2A)-C(21A) | 122.7(11) | O(29A)-C(28A)-C(27A) | 108.3(9)  |
| C(4)-C(3)-C(2)     | 119.4(10) | C(31)-C(30)-C(35)    | 120.5(12) |
| C(2A)-C(3A)-C(4A)  | 118.7(12) | C(31)-C(30)-C(27)    | 116.0(11) |
| C(3)-C(4)-C(5)     | 119.0(10) | C(35)-C(30)-C(27)    | 123.5(11) |
| C(5A)-C(4A)-C(3A)  | 119.2(11) | C(31A)-C(30A)-C(35A) | 118.9(12) |
| C(6)-C(5)-C(4)     | 116.7(10) | C(31A)-C(30A)-C(27A) | 119.5(12) |
| C(4A)-C(5A)-C(6A)  | 119.5(12) | C(35A)-C(30A)-C(27A) | 121.6(11) |
| N(1)-C(6)-C(5)     | 125.0(9)  | C(30)-C(31)-C(32)    | 117.3(14) |
| N(1)-C(6)-C(61)    | 113.9(8)  | C(30A)-C(31A)-C(32A) | 118.7(16) |
| C(5)-C(6)-C(61)    | 120.8(9)  | C(31)-C(32)-C(33)    | 120.7(14) |

|                      |           |                      |           |
|----------------------|-----------|----------------------|-----------|
| C(33A)-C(32A)-C(31A) | 123.5(17) | O(69)-C(68)-C(67)    | 107.4(9)  |
| C(34)-C(33)-C(32)    | 120.8(15) | O(69A)-C(68A)-C(67A) | 108.5(11) |
| C(32A)-C(33A)-C(34A) | 113.9(18) | C(71)-C(70)-C(75)    | 118.2(11) |
| C(33)-C(34)-C(35)    | 120.1(14) | C(71)-C(70)-C(67)    | 119.1(10) |
| C(35A)-C(34A)-C(33A) | 123.6(17) | C(75)-C(70)-C(67)    | 122.7(10) |
| C(34)-C(35)-C(30)    | 120.5(12) | C(75A)-C(70A)-C(71A) | 113.6(12) |
| C(34A)-C(35A)-C(30A) | 121.1(15) | C(75A)-C(70A)-C(67A) | 124.4(11) |
| O(69)-C(61)-N(66)    | 102.1(8)  | C(71A)-C(70A)-C(67A) | 122.0(11) |
| O(69)-C(61)-C(62)    | 108.8(8)  | C(70)-C(71)-C(72)    | 120.7(13) |
| N(66)-C(61)-C(62)    | 110.8(9)  | C(72A)-C(71A)-C(70A) | 122.5(13) |
| O(69)-C(61)-C(6)     | 112.7(8)  | C(71)-C(72)-C(73)    | 120.7(13) |
| N(66)-C(61)-C(6)     | 111.0(7)  | C(73A)-C(72A)-C(71A) | 119.3(13) |
| C(62)-C(61)-C(6)     | 111.1(9)  | C(74)-C(73)-C(72)    | 118.7(13) |
| O(69A)-C(61A)-N(66A) | 103.9(8)  | C(72A)-C(73A)-C(74A) | 124.0(13) |
| O(69A)-C(61A)-C(6A)  | 112.2(9)  | C(73)-C(74)-C(75)    | 120.2(13) |
| N(66A)-C(61A)-C(6A)  | 111.5(8)  | C(73A)-C(74A)-C(75A) | 116.5(14) |
| O(69A)-C(61A)-C(62A) | 107.9(8)  | C(74)-C(75)-C(70)    | 121.2(12) |
| N(66A)-C(61A)-C(62A) | 110.2(9)  | C(74A)-C(75A)-C(70A) | 124.1(13) |
| C(6A)-C(61A)-C(62A)  | 110.9(8)  | C(6)-N(1)-C(2)       | 118.1(8)  |
| C(61)-C(62)-C(63)    | 110.4(9)  | C(6A)-N(1A)-C(2A)    | 120.0(8)  |
| C(61A)-C(62A)-C(63A) | 111.0(8)  | C(25)-N(26)-C(27)    | 123.0(9)  |
| C(62)-C(63)-C(64)    | 113.3(10) | C(25)-N(26)-C(21)    | 125.5(10) |
| C(64A)-C(63A)-C(62A) | 110.3(9)  | C(27)-N(26)-C(21)    | 109.6(8)  |
| C(65)-C(64)-C(63)    | 114.8(10) | C(25A)-N(26A)-C(27A) | 124.0(9)  |
| C(63A)-C(64A)-C(65A) | 117.6(9)  | C(25A)-N(26A)-C(21A) | 124.6(9)  |
| O(65)-C(65)-N(66)    | 116.6(11) | C(27A)-N(26A)-C(21A) | 111.1(8)  |
| O(65)-C(65)-C(64)    | 122.4(12) | C(65)-N(66)-C(61)    | 124.7(9)  |
| N(66)-C(65)-C(64)    | 120.8(12) | C(65)-N(66)-C(67)    | 123.0(10) |
| O(65A)-C(65A)-N(66A) | 121.8(10) | C(61)-N(66)-C(67)    | 110.7(8)  |
| O(65A)-C(65A)-C(64A) | 120.5(10) | C(65A)-N(66A)-C(61A) | 126.2(9)  |
| N(66A)-C(65A)-C(64A) | 117.6(9)  | C(65A)-N(66A)-C(67A) | 121.6(9)  |
| N(66)-C(67)-C(70)    | 116.9(9)  | C(61A)-N(66A)-C(67A) | 109.4(8)  |
| N(66)-C(67)-C(68)    | 101.0(9)  | C(28)-O(29)-C(21)    | 106.9(8)  |
| C(70)-C(67)-C(68)    | 114.0(10) | C(21A)-O(29A)-C(28A) | 109.9(8)  |
| C(70A)-C(67A)-N(66A) | 117.5(8)  | C(61)-O(69)-C(68)    | 107.6(7)  |
| C(70A)-C(67A)-C(68A) | 116.2(11) | C(61A)-O(69A)-C(68A) | 103.9(8)  |
| N(66A)-C(67A)-C(68A) | 98.5(9)   |                      |           |

Table 4. Anisotropic displacement parameters ( $\text{\AA}^2 \times 10^3$ ) for **10**. The anisotropic displacement factor exponent takes the form:  $-2\pi^2 [h^2 a^{*2} U^{11} + \dots + 2 h k a^* b^* U^{12}]$

---

|                 |                 |                 |                 |                 |                 |
|-----------------|-----------------|-----------------|-----------------|-----------------|-----------------|
| U <sup>11</sup> | U <sup>22</sup> | U <sup>33</sup> | U <sup>23</sup> | U <sup>13</sup> | U <sup>12</sup> |
|-----------------|-----------------|-----------------|-----------------|-----------------|-----------------|

---

|        |         |         |         |         |         |         |
|--------|---------|---------|---------|---------|---------|---------|
| C(2)   | 57(6)   | 48(5)   | 50(5)   | 3(4)    | -1(5)   | 7(5)    |
| C(2A)  | 42(6)   | 54(6)   | 72(7)   | 3(5)    | -5(5)   | -1(5)   |
| C(3)   | 55(6)   | 66(6)   | 63(6)   | 7(5)    | -18(5)  | 1(6)    |
| C(3A)  | 43(7)   | 115(10) | 102(9)  | 14(8)   | -18(6)  | 18(7)   |
| C(4)   | 48(6)   | 80(7)   | 72(7)   | -17(6)  | -4(6)   | 11(6)   |
| C(4A)  | 27(6)   | 172(15) | 123(12) | 2(11)   | -5(7)   | 4(8)    |
| C(5)   | 49(6)   | 93(8)   | 61(7)   | 3(6)    | 10(5)   | 9(6)    |
| C(5A)  | 53(7)   | 110(10) | 109(11) | -12(8)  | 34(7)   | -16(7)  |
| C(6)   | 48(5)   | 49(5)   | 46(5)   | 2(4)    | 1(4)    | 1(5)    |
| C(6A)  | 34(5)   | 61(6)   | 70(6)   | 5(5)    | 12(5)   | 3(5)    |
| C(21)  | 81(7)   | 52(5)   | 48(5)   | -4(5)   | -4(6)   | 13(6)   |
| C(21A) | 52(6)   | 62(6)   | 67(6)   | 8(5)    | -6(5)   | -1(5)   |
| C(22)  | 145(12) | 67(7)   | 47(6)   | -3(5)   | 34(8)   | 6(8)    |
| C(22A) | 75(8)   | 87(8)   | 74(7)   | 17(6)   | 5(7)    | 4(7)    |
| C(23)  | 77(9)   | 126(12) | 75(8)   | 3(8)    | 40(7)   | -13(9)  |
| C(23A) | 86(9)   | 83(8)   | 66(7)   | 9(6)    | -2(6)   | -33(7)  |
| C(24)  | 76(9)   | 115(11) | 82(8)   | 6(8)    | 17(7)   | -1(9)   |
| C(24A) | 58(6)   | 60(6)   | 81(7)   | 2(5)    | -8(6)   | -8(6)   |
| C(25)  | 83(9)   | 104(10) | 58(7)   | 0(7)    | 3(7)    | 24(8)   |
| C(25A) | 47(7)   | 93(8)   | 47(6)   | 1(5)    | -3(5)   | -10(6)  |
| C(27)  | 81(8)   | 61(6)   | 68(7)   | -15(5)  | 4(6)    | 0(6)    |
| C(27A) | 70(7)   | 66(7)   | 63(6)   | -10(5)  | -11(6)  | -1(6)   |
| C(28)  | 100(10) | 86(9)   | 88(9)   | -2(7)   | -26(8)  | -20(8)  |
| C(28A) | 94(10)  | 91(9)   | 72(7)   | -10(6)  | -26(7)  | 6(8)    |
| C(30)  | 68(8)   | 76(7)   | 83(8)   | 3(6)    | -2(7)   | -18(7)  |
| C(30A) | 67(8)   | 81(8)   | 72(7)   | -18(6)  | -13(6)  | 1(7)    |
| C(31)  | 78(8)   | 83(8)   | 72(7)   | 19(6)   | -7(6)   | -25(7)  |
| C(31A) | 96(10)  | 59(7)   | 116(11) | -13(7)  | -8(8)   | 13(8)   |
| C(32)  | 73(9)   | 152(14) | 108(12) | 60(10)  | -3(9)   | -25(11) |
| C(32A) | 144(17) | 81(11)  | 173(19) | -37(12) | -76(15) | 34(12)  |
| C(33)  | 100(11) | 121(12) | 98(10)  | 25(10)  | 9(10)   | -31(11) |
| C(33A) | 150(17) | 79(10)  | 144(16) | -29(10) | -42(15) | -14(13) |
| C(34)  | 92(10)  | 85(8)   | 118(11) | -1(8)   | 37(9)   | -11(8)  |
| C(34A) | 139(14) | 80(9)   | 111(11) | -9(9)   | 13(10)  | -50(11) |
| C(35)  | 80(8)   | 66(7)   | 88(8)   | 8(6)    | 17(7)   | -9(7)   |
| C(35A) | 104(10) | 68(7)   | 86(8)   | -1(7)   | -10(8)  | -15(8)  |
| C(61)  | 65(7)   | 77(7)   | 47(6)   | -4(5)   | 5(5)    | 10(6)   |
| C(61A) | 57(6)   | 74(7)   | 50(6)   | 0(5)    | 15(5)   | -18(6)  |
| C(62)  | 78(8)   | 94(8)   | 61(6)   | -4(6)   | -12(6)  | 0(7)    |
| C(62A) | 78(8)   | 69(7)   | 61(6)   | 11(5)   | -15(6)  | -14(6)  |
| C(63)  | 121(11) | 74(7)   | 60(6)   | 17(6)   | -24(7)  | 3(8)    |
| C(63A) | 72(7)   | 63(6)   | 68(6)   | 7(5)    | -14(6)  | 9(6)    |
| C(64)  | 88(9)   | 67(7)   | 88(8)   | 2(6)    | -25(7)  | 23(7)   |



|        |         |         |         |         |         |         |
|--------|---------|---------|---------|---------|---------|---------|
| C(64A) | 64(7)   | 55(6)   | 85(7)   | -8(5)   | -5(6)   | -3(6)   |
| C(65)  | 67(8)   | 95(9)   | 76(8)   | 1(7)    | -20(7)  | 10(7)   |
| C(65A) | 67(8)   | 56(6)   | 59(6)   | 0(5)    | -8(5)   | -10(6)  |
| C(67)  | 52(7)   | 69(7)   | 83(8)   | -11(6)  | -15(6)  | -4(5)   |
| C(67A) | 85(8)   | 74(7)   | 53(6)   | 2(5)    | 12(6)   | -4(6)   |
| C(68)  | 87(9)   | 68(7)   | 87(8)   | -10(6)  | -3(7)   | 4(7)    |
| C(68A) | 112(11) | 122(12) | 68(8)   | -17(7)  | 39(8)   | 0(10)   |
| C(70)  | 54(6)   | 60(6)   | 81(7)   | -5(5)   | -10(6)  | 6(6)    |
| C(70A) | 75(7)   | 82(7)   | 50(6)   | -8(5)   | 1(6)    | 6(7)    |
| C(71)  | 76(8)   | 80(8)   | 96(9)   | 29(7)   | -16(7)  | -25(7)  |
| C(71A) | 97(10)  | 90(9)   | 100(9)  | -11(8)  | -23(8)  | -24(8)  |
| C(72)  | 83(10)  | 143(14) | 148(15) | 52(12)  | -5(10)  | -50(11) |
| C(72A) | 98(11)  | 52(7)   | 154(13) | -12(8)  | -13(11) | -12(7)  |
| C(73)  | 104(11) | 66(7)   | 105(10) | 18(7)   | 14(9)   | 14(8)   |
| C(73A) | 85(9)   | 51(7)   | 139(12) | 0(8)    | 30(10)  | 9(7)    |
| C(74)  | 99(9)   | 66(7)   | 83(8)   | 13(6)   | -13(8)  | -25(7)  |
| C(74A) | 106(11) | 86(9)   | 86(8)   | 6(7)    | -3(8)   | 13(9)   |
| C(75)  | 84(9)   | 90(8)   | 78(8)   | -3(7)   | -14(7)  | -20(8)  |
| C(75A) | 94(9)   | 79(8)   | 93(9)   | -13(7)  | 4(8)    | -9(8)   |
| N(1)   | 47(4)   | 50(4)   | 47(4)   | 5(4)    | 1(4)    | 0(4)    |
| N(1A)  | 39(4)   | 60(4)   | 51(5)   | -3(3)   | -5(4)   | 2(4)    |
| N(26)  | 70(6)   | 47(4)   | 53(5)   | 3(4)    | 2(4)    | 9(4)    |
| N(26A) | 53(5)   | 67(5)   | 50(4)   | -5(4)   | -2(4)   | 4(4)    |
| N(66)  | 51(5)   | 64(5)   | 66(5)   | -6(4)   | -8(4)   | 0(4)    |
| N(66A) | 66(6)   | 45(4)   | 57(5)   | -9(4)   | 13(4)   | -10(4)  |
| O(1W)  | 132(9)  | 199(13) | 149(11) | -25(11) | -13(8)  | 61(10)  |
| O(25)  | 100(7)  | 173(10) | 111(8)  | 53(7)   | 9(6)    | 58(8)   |
| O(25A) | 51(4)   | 89(6)   | 108(6)  | -15(5)  | 0(4)    | 9(5)    |
| O(29)  | 109(6)  | 68(4)   | 56(4)   | -15(4)  | -17(4)  | 6(5)    |
| O(29A) | 85(6)   | 132(8)  | 57(4)   | 16(4)   | -28(4)  | 0(6)    |
| O(65)  | 54(5)   | 167(10) | 114(7)  | 22(7)   | -2(5)   | 10(6)   |
| O(65A) | 78(6)   | 100(6)  | 97(6)   | -14(5)  | -17(5)  | -28(5)  |
| O(69)  | 69(5)   | 79(5)   | 65(4)   | -25(4)  | 9(4)    | 11(4)   |
| O(69A) | 107(6)  | 75(5)   | 71(5)   | -8(4)   | 38(5)   | -20(5)  |

---

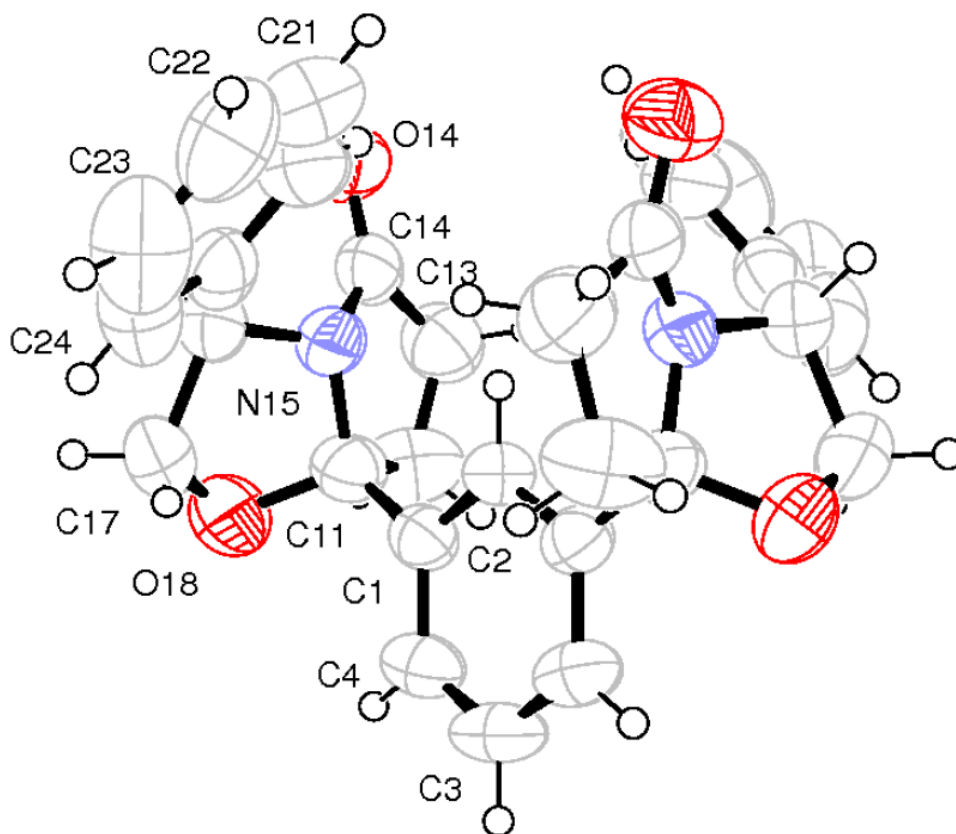

**Fig S3** ORTEP view of molecular structure of **11**.

Table 1. Crystal data and structure refinement for **11**.

|                                 |                                                               |          |
|---------------------------------|---------------------------------------------------------------|----------|
| Identification code             | Jb78                                                          |          |
| Empirical formula               | C <sub>30</sub> H <sub>28</sub> N <sub>2</sub> O <sub>4</sub> |          |
| Formula weight                  | 240.27                                                        |          |
| Temperature                     | 294(2) K                                                      |          |
| Wavelength                      | 0.71073 Å                                                     |          |
| Crystal system                  | Tetragonal                                                    |          |
| Space group                     | P 41 21 2                                                     |          |
| Unit cell dimensions            | a = 9.727(3) Å                                                | ∠ = 90°. |
|                                 | b = 9.727(3) Å                                                | ∠ = 90°. |
|                                 | c = 25.904(32) Å                                              | ∠ = 90°. |
| Volume                          | 2450.9 Å <sup>3</sup>                                         |          |
| Z                               | 4                                                             |          |
| Density (calculated)            | 1.302 Mg/m <sup>3</sup>                                       |          |
| Absorption coefficient          | 0.087 mm <sup>-1</sup>                                        |          |
| F(000)                          | 1016                                                          |          |
| Crystal size                    | 0.42 x 0.38 x 0.33 mm <sup>3</sup>                            |          |
| Theta range for data collection | 2.24 to 29.95°.                                               |          |

|                                   |                                             |
|-----------------------------------|---------------------------------------------|
| Index ranges                      | -9<=h<=9, 0<=k<=13, 0<=l<=36                |
| Reflections collected             | 3567                                        |
| Independent reflections           | 3567                                        |
| Completeness to theta = 29.95°    | 100.0 %                                     |
| Max. and min. transmission        | 0.9719 and 0.9645                           |
| Refinement method                 | Full-matrix least-squares on F <sup>2</sup> |
| Data / restraints / parameters    | 3567 / 0 / 165                              |
| Goodness-of-fit on F <sup>2</sup> | 1.059                                       |
| Final R indices [I>2sigma(I)]     | R1 = 0.0542, wR2 = 0.1488                   |
| R indices (all data)              | R1 = 0.1108, wR2 = 0.1717                   |
| Largest diff. peak and hole       | 0.105 and -0.101 e.Å <sup>-3</sup>          |

Table 2. Atomic coordinates ( x 10<sup>4</sup>) and equivalent isotropic displacement parameters (Å<sup>2</sup>x 10<sup>3</sup>) for **11**. U(eq) is defined as one third of the trace of the orthogonalized U<sup>ij</sup> tensor.

|       | x        | y        | z       | U(eq)  |
|-------|----------|----------|---------|--------|
| C(1)  | -1043(2) | 2640(2)  | 7692(1) | 58(1)  |
| C(2)* | -1341(2) | 1341(2)  | 7500    | 59(1)  |
| C(3)* | -3326(2) | 3326(2)  | 7500    | 81(1)  |
| C(4)  | -2055(3) | 3630(2)  | 7695(1) | 69(1)  |
| C(11) | 402(3)   | 2991(3)  | 7881(1) | 72(1)  |
| C(12) | 1241(3)  | 3787(3)  | 7480(2) | 100(1) |
| C(13) | 2369(3)  | 2843(3)  | 7322(1) | 93(1)  |
| C(14) | 2432(3)  | 1759(3)  | 7734(1) | 70(1)  |
| C(16) | 1055(3)  | 1409(3)  | 8537(1) | 76(1)  |
| C(17) | 210(4)   | 2637(4)  | 8737(1) | 112(1) |
| C(19) | 424(2)   | 15(3)    | 8634(1) | 71(1)  |
| C(20) | 809(3)   | -1106(3) | 8342(1) | 86(1)  |
| C(21) | 304(4)   | -2422(3) | 8447(2) | 102(1) |
| C(22) | -597(4)  | -2624(5) | 8840(2) | 114(1) |
| C(23) | -995(4)  | -1547(6) | 9130(2) | 124(1) |
| C(24) | -502(3)  | -233(5)  | 9030(1) | 109(1) |
| N(15) | 1219(2)  | 1783(2)  | 7991(1) | 67(1)  |
| O(14) | 3370(2)  | 965(2)   | 7826(1) | 93(1)  |
| O(18) | 345(3)   | 3694(2)  | 8359(1) | 104(1) |

\* at special position

Table 3. Bond lengths [Å] and angles [°] for **11**.

|                  |          |                   |          |
|------------------|----------|-------------------|----------|
| C(1)-C(4)        | 1.376(3) | C(3)-C(4)-C(1)    | 119.6(3) |
| C(1)-C(2)        | 1.388(3) | O(18)-C(11)-N(15) | 104.0(2) |
| C(1)-C(11)       | 1.527(4) | O(18)-C(11)-C(1)  | 110.6(2) |
| C(2)-C(1)#1      | 1.388(3) | N(15)-C(11)-C(1)  | 112.8(2) |
| C(3)-C(4)#1      | 1.368(3) | O(18)-C(11)-C(12) | 111.7(2) |
| C(3)-C(4)        | 1.368(3) | N(15)-C(11)-C(12) | 104.5(2) |
| C(11)-O(18)      | 1.415(3) | C(1)-C(11)-C(12)  | 112.7(2) |
| C(11)-N(15)      | 1.447(3) | C(13)-C(12)-C(11) | 105.5(2) |
| C(11)-C(12)      | 1.532(4) | C(12)-C(13)-C(14) | 105.6(3) |
| C(12)-C(13)      | 1.488(4) | O(14)-C(14)-N(15) | 124.5(3) |
| C(13)-C(14)      | 1.502(4) | O(14)-C(14)-C(13) | 127.9(3) |
| C(14)-O(14)      | 1.219(3) | N(15)-C(14)-C(13) | 107.6(2) |
| C(14)-N(15)      | 1.355(3) | N(15)-C(16)-C(19) | 115.2(2) |
| C(16)-N(15)      | 1.470(4) | N(15)-C(16)-C(17) | 100.9(2) |
| C(16)-C(19)      | 1.510(4) | C(19)-C(16)-C(17) | 115.1(3) |
| C(16)-C(17)      | 1.539(4) | O(18)-C(17)-C(16) | 106.3(3) |
| C(17)-O(18)      | 1.425(4) | C(20)-C(19)-C(24) | 116.4(3) |
| C(19)-C(20)      | 1.380(4) | C(20)-C(19)-C(16) | 120.5(2) |
| C(19)-C(24)      | 1.386(4) | C(24)-C(19)-C(16) | 122.9(3) |
| C(20)-C(21)      | 1.398(4) | C(19)-C(20)-C(21) | 121.4(3) |
| C(21)-C(22)      | 1.357(5) | C(22)-C(21)-C(20) | 120.4(4) |
| C(22)-C(23)      | 1.347(6) | C(23)-C(22)-C(21) | 119.4(4) |
| C(23)-C(24)      | 1.390(6) | C(22)-C(23)-C(24) | 120.8(4) |
|                  |          | C(19)-C(24)-C(23) | 121.5(4) |
| C(4)-C(1)-C(2)   | 119.2(2) | C(14)-N(15)-C(11) | 113.3(2) |
| C(4)-C(1)-C(11)  | 120.0(2) | C(14)-N(15)-C(16) | 124.3(2) |
| C(2)-C(1)-C(11)  | 120.7(2) | C(11)-N(15)-C(16) | 109.3(2) |
| C(1)#1-C(2)-C(1) | 120.6(3) | C(11)-O(18)-C(17) | 104.8(2) |
| C(4)#1-C(3)-C(4) | 121.7(3) |                   |          |

Symmetry transformations used to generate equivalent atoms:

#1 -y,-x,-z+3/2

Table 4. Anisotropic displacement parameters ( $\text{\AA}^2 \times 10^3$ ) for **11**. The anisotropic displacement factor exponent takes the form:  $-2\pi^2 [h^2 a^{*2} U_{11} + \dots + 2 h k a^* b^* U_{12}]$

| U <sub>11</sub> | U <sub>22</sub> | U <sub>33</sub> | U <sub>23</sub> | U <sub>13</sub> | U <sub>12</sub> |
|-----------------|-----------------|-----------------|-----------------|-----------------|-----------------|
|-----------------|-----------------|-----------------|-----------------|-----------------|-----------------|

---

|       |        |        |        |        |        |        |
|-------|--------|--------|--------|--------|--------|--------|
| C(1)  | 65(1)  | 55(1)  | 55(1)  | 2(1)   | 7(1)   | 6(1)   |
| C(2)* | 58(1)  | 58(1)  | 62(2)  | -1(1)  | -1(1)  | 11(1)  |
| C(3)* | 69(1)  | 69(1)  | 105(3) | 11(2)  | 11(2)  | 28(2)  |
| C(4)  | 73(2)  | 54(1)  | 81(2)  | 6(1)   | 15(1)  | 13(1)  |
| C(11) | 74(2)  | 59(1)  | 83(2)  | -7(1)  | -6(1)  | 8(1)   |
| C(12) | 78(2)  | 67(2)  | 153(3) | 20(2)  | 4(2)   | -10(1) |
| C(13) | 104(2) | 87(2)  | 89(2)  | 2(2)   | 10(2)  | 6(2)   |
| C(14) | 62(1)  | 80(2)  | 68(2)  | -15(1) | -7(1)  | 4(1)   |
| C(16) | 74(2)  | 87(2)  | 66(2)  | -14(1) | -11(1) | 14(1)  |
| C(17) | 159(4) | 111(2) | 68(2)  | -21(2) | -11(2) | 50(2)  |
| C(19) | 58(1)  | 92(2)  | 64(2)  | -2(1)  | -7(1)  | -1(1)  |
| C(20) | 77(2)  | 85(2)  | 95(2)  | 9(2)   | 2(2)   | 13(2)  |
| C(21) | 89(2)  | 91(2)  | 127(3) | 19(2)  | -12(2) | 5(2)   |
| C(22) | 104(3) | 135(3) | 103(3) | 29(2)  | -27(2) | -36(2) |
| C(23) | 97(2)  | 173(4) | 100(3) | -1(3)  | 9(2)   | -56(3) |
| C(24) | 84(2)  | 160(4) | 82(2)  | -23(2) | 4(2)   | -19(2) |
| N(15) | 63(1)  | 68(1)  | 68(1)  | -7(1)  | -11(1) | 5(1)   |
| O(14) | 66(1)  | 111(2) | 102(2) | 1(1)   | -2(1)  | 15(1)  |
| O(18) | 129(2) | 77(1)  | 107(2) | -38(1) | -30(2) | 19(1)  |

---

\* at special position

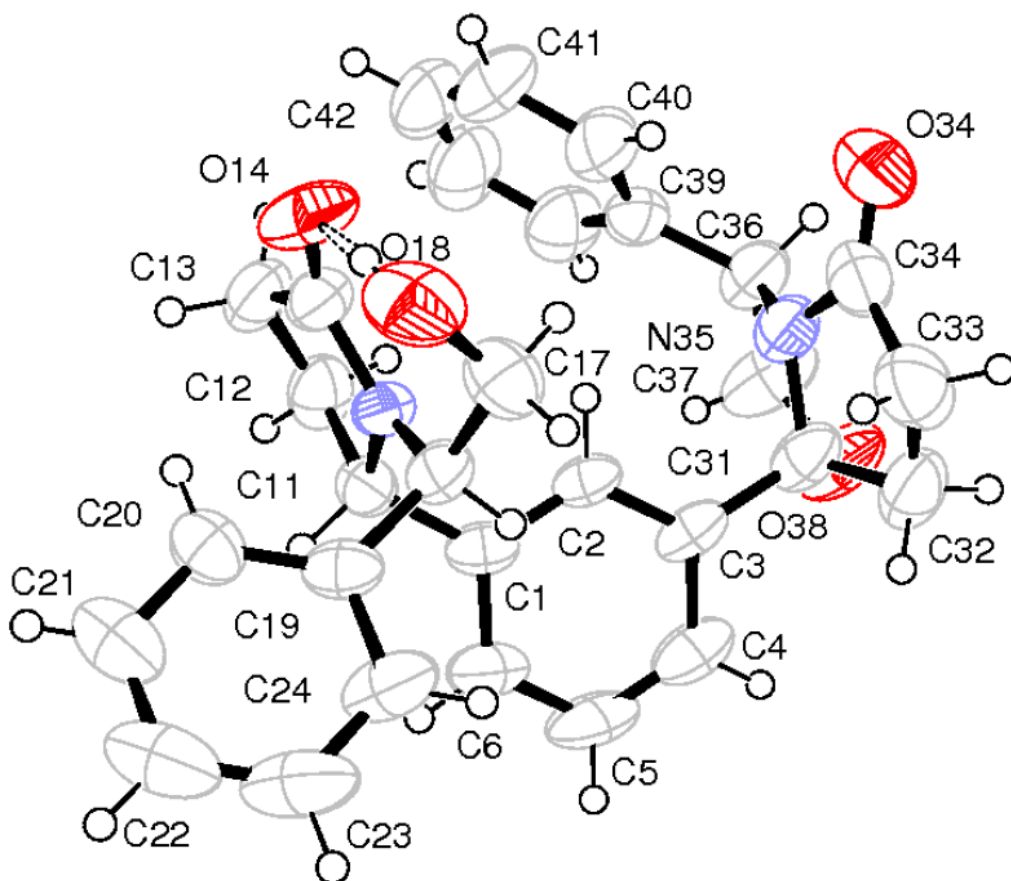

**Fig S4** ORTEP view of molecular structure of **18**.

Table 1. Crystal data and structure refinement for **18**.

|                        |                                                               |          |
|------------------------|---------------------------------------------------------------|----------|
| Identification code    | Jb80                                                          |          |
| Empirical formula      | C <sub>30</sub> H <sub>30</sub> N <sub>2</sub> O <sub>4</sub> |          |
| Formula weight         | 482.56                                                        |          |
| Temperature            | 294(2) K                                                      |          |
| Wavelength             | 0.71073 Å                                                     |          |
| Crystal system         | Orthorhombic                                                  |          |
| Space group            | P 21 21 21                                                    |          |
| Unit cell dimensions   | a = 9.737(8) Å                                                | ∠ = 90°. |
|                        | b = 10.015(6) Å                                               | ∠ = 90°. |
|                        | c = 26.408(11) Å                                              | ∠ = 90°. |
| Volume                 | 2575(3) Å <sup>3</sup>                                        |          |
| Z                      | 4                                                             |          |
| Density (calculated)   | 1.245 Mg/m <sup>3</sup>                                       |          |
| Absorption coefficient | 0.083 mm <sup>-1</sup>                                        |          |
| F(000)                 | 1024                                                          |          |
| Crystal size           | 0.43 x 0.39 x 0.18 mm <sup>3</sup>                            |          |

|                                   |                                             |
|-----------------------------------|---------------------------------------------|
| Theta range for data collection   | 1.54 to 26.97°.                             |
| Index ranges                      | 0<=h<=12, 0<=k<=12, 0<=l<=33                |
| Reflections collected             | 3175                                        |
| Independent reflections           | 3175                                        |
| Completeness to theta = 26.97°    | 99.8 %                                      |
| Max. and min. transmission        | 0.9853 and 0.9653                           |
| Refinement method                 | Full-matrix least-squares on F <sup>2</sup> |
| Data / restraints / parameters    | 3175 / 0 / 326                              |
| Goodness-of-fit on F <sup>2</sup> | 1.124                                       |
| Final R indices [I>2sigma(I)]     | R1 = 0.0639, wR2 = 0.1898                   |
| R indices (all data)              | R1 = 0.0894, wR2 = 0.2124                   |
| Largest diff. peak and hole       | 0.359 and -0.229 e.Å <sup>-3</sup>          |

Table 2. Atomic coordinates ( x 10<sup>4</sup>) and equivalent isotropic displacement parameters (Å<sup>2</sup>x 10<sup>3</sup>) for **18**. U(eq) is defined as one third of the trace of the orthogonalized U<sup>ij</sup> tensor.

|       | x       | y        | z       | U(eq) |
|-------|---------|----------|---------|-------|
| O(14) | 6588(5) | 2681(3)  | 8269(2) | 87(1) |
| O(18) | 5814(4) | 1951(4)  | 7355(1) | 85(1) |
| O(34) | 791(4)  | 208(5)   | 8844(2) | 97(1) |
| O(38) | 2450(5) | -3290(3) | 9531(1) | 89(1) |
| N(15) | 6787(3) | 390(3)   | 8346(1) | 46(1) |
| N(35) | 2400(4) | -1268(3) | 9148(1) | 60(1) |
| C(1)  | 6568(5) | -1822(4) | 8764(1) | 48(1) |
| C(2)  | 5180(4) | -1704(4) | 8887(1) | 47(1) |
| C(3)  | 4349(5) | -2807(4) | 8956(2) | 56(1) |
| C(4)  | 4922(7) | -4074(4) | 8917(2) | 74(2) |
| C(5)  | 6287(7) | -4210(4) | 8797(2) | 78(2) |
| C(6)  | 7100(5) | -3094(4) | 8719(2) | 65(1) |
| C(11) | 7419(4) | -580(4)  | 8705(1) | 48(1) |
| C(12) | 7547(5) | 265(5)   | 9192(2) | 63(1) |
| C(13) | 7652(6) | 1682(5)  | 9004(2) | 72(1) |
| C(14) | 6933(5) | 1670(4)  | 8503(2) | 61(1) |
| C(16) | 6424(4) | -102(4)  | 7838(1) | 49(1) |
| C(17) | 5350(5) | 731(6)   | 7554(2) | 68(1) |
| C(19) | 7711(5) | -367(4)  | 7521(1) | 51(1) |
| C(20) | 8885(4) | 393(5)   | 7569(2) | 59(1) |

|       |          |          |          |        |
|-------|----------|----------|----------|--------|
| C(21) | 10031(5) | 106(6)   | 7283(2)  | 81(2)  |
| C(22) | 10020(7) | -916(7)  | 6936(2)  | 93(2)  |
| C(23) | 8874(8)  | -1687(6) | 6887(2)  | 95(2)  |
| C(24) | 7703(7)  | -1409(5) | 7175(2)  | 76(2)  |
| C(31) | 2814(5)  | -2663(4) | 9072(2)  | 63(1)  |
| C(32) | 1873(6)  | -3127(6) | 8633(2)  | 79(2)  |
| C(33) | 1426(6)  | -1847(7) | 8374(2)  | 90(2)  |
| C(34) | 1447(5)  | -822(6)  | 8806(2)  | 74(1)  |
| C(36) | 2458(6)  | -953(5)  | 9696(2)  | 68(1)  |
| C(37) | 2793(9)  | -2326(5) | 9917(2)  | 93(2)  |
| C(39) | 3438(5)  | 174(4)   | 9823(2)  | 59(1)  |
| C(40) | 3444(7)  | 1306(5)  | 9514(3)  | 84(2)  |
| C(41) | 4274(8)  | 2372(6)  | 9647(4)  | 113(2) |
| C(42) | 5112(8)  | 2324(8)  | 10048(4) | 116(3) |
| C(43) | 5082(7)  | 1237(7)  | 10342(3) | 98(2)  |
| C(44) | 4275(7)  | 183(6)   | 10235(2) | 84(2)  |

Table 3. Bond lengths [Å] and angles [°] for **18**.

|             |          |             |          |
|-------------|----------|-------------|----------|
| O(14)-C(14) | 1.234(6) | C(11)-C(12) | 1.545(5) |
| O(18)-C(17) | 1.405(6) | C(12)-C(13) | 1.507(7) |
| O(34)-C(34) | 1.217(7) | C(13)-C(14) | 1.497(8) |
| O(38)-C(31) | 1.408(5) | C(16)-C(19) | 1.531(6) |
| O(38)-C(37) | 1.444(6) | C(16)-C(17) | 1.533(6) |
| N(15)-C(14) | 1.355(5) | C(19)-C(20) | 1.380(6) |
| N(15)-C(16) | 1.472(5) | C(19)-C(24) | 1.387(6) |
| N(15)-C(11) | 1.491(5) | C(20)-C(21) | 1.378(6) |
| N(35)-C(34) | 1.370(7) | C(21)-C(22) | 1.374(9) |
| N(35)-C(31) | 1.468(6) | C(22)-C(23) | 1.363(9) |
| N(35)-C(36) | 1.481(6) | C(23)-C(24) | 1.399(9) |
| C(1)-C(6)   | 1.380(6) | C(31)-C(32) | 1.549(7) |
| C(1)-C(2)   | 1.395(6) | C(32)-C(33) | 1.516(9) |
| C(1)-C(11)  | 1.503(6) | C(33)-C(34) | 1.535(8) |
| C(2)-C(3)   | 1.381(6) | C(36)-C(39) | 1.516(6) |
| C(3)-C(4)   | 1.389(7) | C(36)-C(37) | 1.529(7) |
| C(3)-C(31)  | 1.533(7) | C(39)-C(44) | 1.360(7) |
| C(4)-C(5)   | 1.373(9) | C(39)-C(40) | 1.397(7) |
| C(5)-C(6)   | 1.386(8) | C(40)-C(41) | 1.383(8) |



|                   |           |                   |          |
|-------------------|-----------|-------------------|----------|
| C(41)-C(42)       | 1.338(12) | O(18)-C(17)-C(16) | 115.9(4) |
| C(42)-C(43)       | 1.338(11) | C(20)-C(19)-C(24) | 118.7(4) |
| C(43)-C(44)       | 1.346(8)  | C(20)-C(19)-C(16) | 122.2(3) |
|                   |           | C(24)-C(19)-C(16) | 119.1(4) |
| C(31)-O(38)-C(37) | 104.5(3)  | C(21)-C(20)-C(19) | 120.4(5) |
| C(14)-N(15)-C(16) | 128.4(3)  | C(22)-C(21)-C(20) | 121.0(6) |
| C(14)-N(15)-C(11) | 112.3(3)  | C(23)-C(22)-C(21) | 119.5(5) |
| C(16)-N(15)-C(11) | 117.4(3)  | C(22)-C(23)-C(24) | 120.2(5) |
| C(34)-N(35)-C(31) | 114.0(4)  | C(19)-C(24)-C(23) | 120.3(6) |
| C(34)-N(35)-C(36) | 126.9(4)  | O(38)-C(31)-N(35) | 103.8(3) |
| C(31)-N(35)-C(36) | 109.0(4)  | O(38)-C(31)-C(3)  | 112.1(4) |
| C(6)-C(1)-C(2)    | 117.5(4)  | N(35)-C(31)-C(3)  | 112.6(3) |
| C(6)-C(1)-C(11)   | 123.2(4)  | O(38)-C(31)-C(32) | 111.2(4) |
| C(2)-C(1)-C(11)   | 119.2(3)  | N(35)-C(31)-C(32) | 103.0(4) |
| C(3)-C(2)-C(1)    | 122.0(4)  | C(3)-C(31)-C(32)  | 113.5(4) |
| C(2)-C(3)-C(4)    | 119.0(5)  | C(33)-C(32)-C(31) | 104.7(4) |
| C(2)-C(3)-C(31)   | 121.5(4)  | C(32)-C(33)-C(34) | 103.1(5) |
| C(4)-C(3)-C(31)   | 119.5(4)  | O(34)-C(34)-N(35) | 125.3(5) |
| C(5)-C(4)-C(3)    | 119.8(5)  | O(34)-C(34)-C(33) | 128.4(5) |
| C(4)-C(5)-C(6)    | 120.5(4)  | N(35)-C(34)-C(33) | 106.3(5) |
| C(1)-C(6)-C(5)    | 121.1(5)  | N(35)-C(36)-C(39) | 113.5(4) |
| N(15)-C(11)-C(1)  | 112.1(3)  | N(35)-C(36)-C(37) | 101.0(3) |
| N(15)-C(11)-C(12) | 101.9(3)  | C(39)-C(36)-C(37) | 116.8(5) |
| C(1)-C(11)-C(12)  | 114.4(3)  | O(38)-C(37)-C(36) | 106.3(4) |
| C(13)-C(12)-C(11) | 104.3(3)  | C(44)-C(39)-C(40) | 117.4(5) |
| C(14)-C(13)-C(12) | 104.6(3)  | C(44)-C(39)-C(36) | 124.0(5) |
| O(14)-C(14)-N(15) | 126.5(5)  | C(40)-C(39)-C(36) | 118.5(5) |
| O(14)-C(14)-C(13) | 124.3(4)  | C(41)-C(40)-C(39) | 118.7(6) |
| N(15)-C(14)-C(13) | 109.1(4)  | C(42)-C(41)-C(40) | 121.9(7) |
| N(15)-C(16)-C(19) | 111.1(3)  | C(43)-C(42)-C(41) | 118.4(7) |
| N(15)-C(16)-C(17) | 115.3(3)  | C(42)-C(43)-C(44) | 121.9(7) |
| C(19)-C(16)-C(17) | 112.6(3)  | C(43)-C(44)-C(39) | 121.5(6) |

Table 4. Anisotropic displacement parameters ( $\text{\AA}^2 \times 10^3$ ) for **18**. The anisotropic displacement factor exponent takes the form:  $-2\pi^2 [h^2 a^{*2} U_{11} + \dots + 2 h k a^* b^* U_{12}]$

---

|                 |                 |                 |                 |                 |                 |
|-----------------|-----------------|-----------------|-----------------|-----------------|-----------------|
| U <sub>11</sub> | U <sub>22</sub> | U <sub>33</sub> | U <sub>23</sub> | U <sub>13</sub> | U <sub>12</sub> |
|-----------------|-----------------|-----------------|-----------------|-----------------|-----------------|

---

---

|       |        |        |        |        |        |        |
|-------|--------|--------|--------|--------|--------|--------|
| O(14) | 127(3) | 36(2)  | 97(3)  | 5(2)   | 8(2)   | 3(2)   |
| O(18) | 93(3)  | 74(2)  | 88(2)  | 31(2)  | 1(2)   | 25(2)  |
| O(34) | 66(2)  | 99(3)  | 124(3) | -21(3) | -10(2) | 18(2)  |
| O(38) | 135(3) | 54(2)  | 79(2)  | -4(2)  | 37(2)  | -35(2) |
| N(15) | 49(2)  | 35(1)  | 55(2)  | -4(1)  | 7(1)   | 0(1)   |
| N(35) | 62(2)  | 55(2)  | 61(2)  | -9(2)  | 7(2)   | -11(2) |
| C(1)  | 66(2)  | 38(2)  | 39(2)  | 1(2)   | -2(2)  | 11(2)  |
| C(2)  | 66(2)  | 28(2)  | 47(2)  | 4(1)   | 4(2)   | 1(2)   |
| C(3)  | 83(3)  | 32(2)  | 52(2)  | -1(2)  | 1(2)   | -11(2) |
| C(4)  | 107(4) | 33(2)  | 82(3)  | 5(2)   | -6(3)  | -8(3)  |
| C(5)  | 120(5) | 32(2)  | 84(3)  | -2(2)  | -20(3) | 20(3)  |
| C(6)  | 81(3)  | 49(2)  | 67(3)  | -13(2) | -13(2) | 20(2)  |
| C(11) | 45(2)  | 49(2)  | 49(2)  | -2(2)  | 1(2)   | 2(2)   |
| C(12) | 62(2)  | 74(3)  | 53(2)  | -12(2) | 0(2)   | -12(3) |
| C(13) | 77(3)  | 59(2)  | 81(3)  | -23(2) | 16(3)  | -22(3) |
| C(14) | 62(3)  | 42(2)  | 79(3)  | -7(2)  | 17(2)  | -7(2)  |
| C(16) | 56(2)  | 39(2)  | 51(2)  | 2(2)   | 1(2)   | -4(2)  |
| C(17) | 59(3)  | 76(3)  | 69(3)  | 8(2)   | -6(2)  | 10(2)  |
| C(19) | 69(2)  | 37(2)  | 48(2)  | 7(2)   | 4(2)   | 11(2)  |
| C(20) | 55(2)  | 68(3)  | 54(2)  | 5(2)   | 6(2)   | 6(2)   |
| C(21) | 67(3)  | 96(4)  | 79(3)  | 17(3)  | 17(3)  | 23(3)  |
| C(22) | 110(5) | 88(4)  | 82(4)  | 21(3)  | 37(4)  | 46(4)  |
| C(23) | 145(6) | 60(3)  | 80(3)  | -13(3) | 31(4)  | 21(4)  |
| C(24) | 112(4) | 44(2)  | 73(3)  | -10(2) | 13(3)  | -4(3)  |
| C(31) | 81(3)  | 49(2)  | 58(2)  | -6(2)  | 18(2)  | -21(2) |
| C(32) | 76(3)  | 83(4)  | 77(3)  | -29(3) | 11(3)  | -26(3) |
| C(33) | 69(3)  | 113(5) | 90(4)  | -24(4) | -12(3) | 10(4)  |
| C(34) | 50(2)  | 84(3)  | 87(3)  | -16(3) | 0(3)   | -1(3)  |
| C(36) | 77(3)  | 60(2)  | 68(3)  | -17(2) | 29(3)  | -19(3) |
| C(37) | 165(6) | 59(3)  | 56(3)  | 1(2)   | 23(3)  | -22(4) |
| C(39) | 60(2)  | 52(2)  | 65(2)  | -12(2) | 13(2)  | 0(2)   |
| C(40) | 79(3)  | 58(3)  | 115(4) | 10(3)  | -13(3) | -5(3)  |
| C(41) | 115(5) | 44(3)  | 179(7) | 6(4)   | -4(6)  | -18(3) |
| C(42) | 92(4)  | 95(5)  | 160(7) | -71(5) | 14(5)  | -26(4) |
| C(43) | 96(4)  | 106(5) | 91(4)  | -36(4) | -3(4)  | -25(4) |
| C(44) | 95(4)  | 87(4)  | 71(3)  | -25(3) | -1(3)  | -8(4)  |

---

Table 5. Hydrogen bonds for **18** [ $\text{\AA}$  and  $^\circ$ ].

| D-H...A             | d(D-H) | d(H...A) | d(D...A) | $\angle(\text{DHA})$ |
|---------------------|--------|----------|----------|----------------------|
| O(18)-H(18)...O(14) | 0.82   | 1.88     | 2.631(6) | 151.4                |

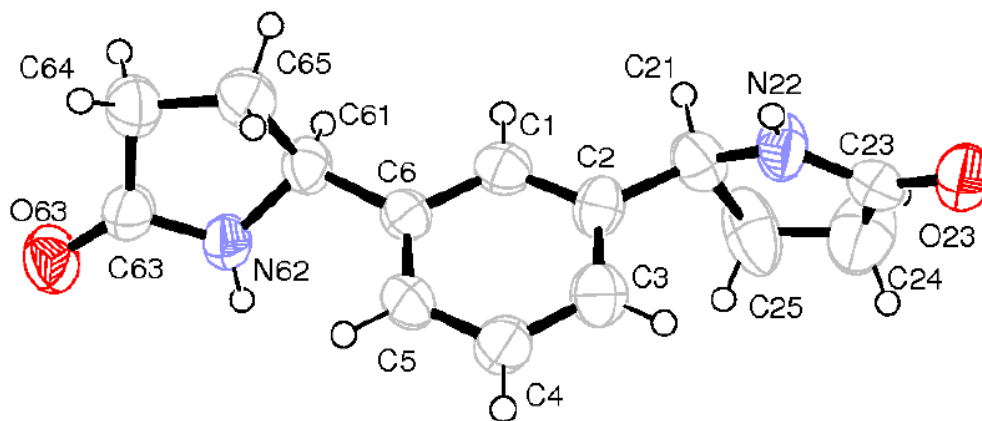

**Fig S5** ORTEP view of molecular structure of **21**.

Table 1. Crystal data and structure refinement for **21**.

|                                   |                                                               |                |
|-----------------------------------|---------------------------------------------------------------|----------------|
| Identification code               | Jb82                                                          |                |
| Empirical formula                 | C <sub>14</sub> H <sub>16</sub> N <sub>2</sub> O <sub>2</sub> |                |
| Formula weight                    | 244.29                                                        |                |
| Temperature                       | 294(2) K                                                      |                |
| Wavelength                        | 0.71073 Å                                                     |                |
| Crystal system                    | Monoclinic                                                    |                |
| Space group                       | P 21                                                          |                |
| Unit cell dimensions              | a = 5.559(6) Å                                                | ∠ = 90°.       |
|                                   | b = 8.894(4) Å                                                | ∠ = 92.64(6)°. |
|                                   | c = 12.507(6) Å                                               | ∠ = 90°.       |
| Volume                            | 617.7(8) Å <sup>3</sup>                                       |                |
| Z                                 | 2                                                             |                |
| Density (calculated)              | 1.313 Mg/m <sup>3</sup>                                       |                |
| Absorption coefficient            | 0.089 mm <sup>-1</sup>                                        |                |
| F(000)                            | 260                                                           |                |
| Crystal size                      | 0.38 x 0.24 x 0.23 mm <sup>3</sup>                            |                |
| Theta range for data collection   | 1.63 to 25.98°.                                               |                |
| Index ranges                      | -6<=h<=6, -10<=k<=10, 0<=l<=15                                |                |
| Reflections collected             | 2410                                                          |                |
| Independent reflections           | 2410                                                          |                |
| Completeness to theta = 25.98°    | 100.0 %                                                       |                |
| Max. and min. transmission        | 0.9798 and 0.9669                                             |                |
| Refinement method                 | Full-matrix least-squares on F <sup>2</sup>                   |                |
| Data / restraints / parameters    | 2410 / 1 / 163                                                |                |
| Goodness-of-fit on F <sup>2</sup> | 0.869                                                         |                |
| Final R indices [I>2sigma(I)]     | R1 = 0.0630, wR2 = 0.1355                                     |                |

R indices (all data) R1 = 0.1612, wR2 = 0.1654  
Largest diff. peak and hole 0.172 and -0.148 e.Å<sup>-3</sup>

Table 2. Atomic coordinates ( $\times 10^4$ ) and equivalent isotropic displacement parameters ( $\text{Å}^2 \times 10^3$ ) for **21**. U(eq) is defined as one third of the trace of the orthogonalized  $U^{ij}$  tensor.

|       | x        | y        | z       | U(eq) |
|-------|----------|----------|---------|-------|
| C(1)  | 5753(10) | 10171(7) | 2717(4) | 52(1) |
| C(2)  | 3999(10) | 9372(6)  | 2120(4) | 51(2) |
| C(3)  | 2096(10) | 10164(6) | 1645(4) | 58(2) |
| C(4)  | 1936(10) | 11703(6) | 1747(4) | 58(2) |
| C(5)  | 3646(10) | 12463(6) | 2365(4) | 53(2) |
| C(6)  | 5540(9)  | 11760(6) | 2862(4) | 45(1) |
| C(21) | 4334(11) | 7709(6)  | 1920(5) | 60(2) |
| C(23) | 1587(10) | 5932(7)  | 1199(5) | 56(1) |
| C(24) | 3469(12) | 6077(9)  | 409(5)  | 96(2) |
| C(25) | 5007(13) | 7336(6)  | 775(6)  | 90(2) |
| C(61) | 7401(9)  | 12557(6) | 3579(4) | 51(1) |
| C(63) | 8382(10) | 15094(7) | 3977(4) | 56(2) |
| C(64) | 7894(11) | 14326(6) | 5018(4) | 65(2) |
| C(65) | 6453(10) | 12946(6) | 4691(4) | 62(2) |
| N(22) | 2088(8)  | 6865(5)  | 2011(4) | 62(1) |
| N(62) | 8005(8)  | 14070(5) | 3196(3) | 55(1) |
| O(23) | -139(8)  | 5043(5)  | 1133(3) | 74(1) |
| O(63) | 9095(8)  | 16380(4) | 3846(3) | 74(1) |

Table 3. Bond lengths [Å] and angles [°] for **21**.

|             |          |             |          |
|-------------|----------|-------------|----------|
| C(1)-C(2)   | 1.395(8) | C(21)-C(25) | 1.533(8) |
| C(1)-C(6)   | 1.430(7) | C(23)-O(23) | 1.243(6) |
| C(2)-C(3)   | 1.382(7) | C(23)-N(22) | 1.331(7) |
| C(2)-C(21)  | 1.513(7) | C(23)-C(24) | 1.477(8) |
| C(3)-C(4)   | 1.378(7) | C(24)-C(25) | 1.469(8) |
| C(4)-C(5)   | 1.374(7) | C(61)-N(62) | 1.473(7) |
| C(5)-C(6)   | 1.351(7) | C(61)-C(65) | 1.549(8) |
| C(6)-C(61)  | 1.514(7) | C(63)-O(63) | 1.224(6) |
| C(21)-N(22) | 1.466(7) | C(63)-N(62) | 1.345(6) |

|                   |          |                   |          |
|-------------------|----------|-------------------|----------|
| C(63)-C(64)       | 1.505(7) | O(23)-C(23)-N(22) | 125.5(5) |
| C(64)-C(65)       | 1.512(7) | O(23)-C(23)-C(24) | 125.4(6) |
|                   |          | N(22)-C(23)-C(24) | 109.1(5) |
| C(2)-C(1)-C(6)    | 120.7(6) | C(25)-C(24)-C(23) | 106.1(6) |
| C(3)-C(2)-C(1)    | 118.2(6) | C(24)-C(25)-C(21) | 107.0(5) |
| C(3)-C(2)-C(21)   | 121.7(6) | N(62)-C(61)-C(6)  | 113.3(4) |
| C(1)-C(2)-C(21)   | 119.8(6) | N(62)-C(61)-C(65) | 100.4(4) |
| C(4)-C(3)-C(2)    | 121.2(6) | C(6)-C(61)-C(65)  | 112.7(4) |
| C(5)-C(4)-C(3)    | 119.7(6) | O(63)-C(63)-N(62) | 125.2(5) |
| C(6)-C(5)-C(4)    | 122.4(5) | O(63)-C(63)-C(64) | 127.7(5) |
| C(5)-C(6)-C(1)    | 117.8(6) | N(62)-C(63)-C(64) | 107.0(5) |
| C(5)-C(6)-C(61)   | 123.6(5) | C(63)-C(64)-C(65) | 104.4(4) |
| C(1)-C(6)-C(61)   | 118.6(6) | C(64)-C(65)-C(61) | 103.0(4) |
| N(22)-C(21)-C(2)  | 112.1(5) | C(23)-N(22)-C(21) | 114.1(5) |
| N(22)-C(21)-C(25) | 102.0(5) | C(63)-N(62)-C(61) | 114.4(4) |
| C(2)-C(21)-C(25)  | 113.8(5) |                   |          |

Table 4. Anisotropic displacement parameters ( $\text{\AA}^2 \times 10^3$ ) for **21**. The anisotropic displacement factor exponent takes the form:  $-2\pi^2 [h^2 a^{*2} U^{11} + \dots + 2 h k a^* b^* U^{12}]$

|       | U <sup>11</sup> | U <sup>22</sup> | U <sup>33</sup> | U <sup>23</sup> | U <sup>13</sup> | U <sup>12</sup> |
|-------|-----------------|-----------------|-----------------|-----------------|-----------------|-----------------|
| C(1)  | 55(3)           | 55(4)           | 48(3)           | 5(3)            | 9(3)            | -1(3)           |
| C(2)  | 49(3)           | 54(4)           | 51(3)           | -13(3)          | 7(3)            | -1(3)           |
| C(3)  | 58(4)           | 56(4)           | 62(4)           | -6(3)           | 6(3)            | 0(3)            |
| C(4)  | 59(4)           | 54(4)           | 61(4)           | -8(3)           | -10(3)          | 15(3)           |
| C(5)  | 58(3)           | 40(3)           | 60(4)           | 0(3)            | -1(3)           | 7(3)            |
| C(6)  | 46(3)           | 45(3)           | 46(3)           | 3(3)            | 4(3)            | -6(3)           |
| C(21) | 62(4)           | 47(4)           | 72(4)           | 2(3)            | 3(3)            | 2(3)            |
| C(23) | 67(4)           | 48(3)           | 53(3)           | 12(3)           | -2(3)           | -7(3)           |
| C(24) | 96(5)           | 122(6)          | 74(4)           | -18(5)          | 25(4)           | -37(5)          |
| C(25) | 109(6)          | 57(4)           | 107(6)          | -27(4)          | 58(5)           | -12(4)          |
| C(61) | 51(3)           | 48(3)           | 53(3)           | -3(3)           | 5(3)            | -10(3)          |
| C(63) | 61(4)           | 56(4)           | 52(4)           | -2(3)           | -2(3)           | -11(3)          |
| C(64) | 82(4)           | 54(4)           | 61(4)           | -7(3)           | 9(3)            | -3(3)           |
| C(65) | 69(4)           | 58(4)           | 59(4)           | 4(3)            | 7(3)            | -9(3)           |
| N(22) | 75(3)           | 56(3)           | 56(3)           | -16(3)          | 12(3)           | -17(3)          |

|       |       |       |       |       |       |        |
|-------|-------|-------|-------|-------|-------|--------|
| N(62) | 70(3) | 47(3) | 48(3) | -2(2) | 1(2)  | -14(2) |
| O(23) | 86(3) | 69(3) | 65(3) | -5(2) | -6(2) | -23(3) |
| O(63) | 98(3) | 56(3) | 68(3) | -2(2) | 17(2) | -25(2) |

Table 5. Hydrogen bonds for **21** [Å and °].

| D-H...A               | d(D-H) | d(H...A) | d(D...A) | <(DHA) |
|-----------------------|--------|----------|----------|--------|
| N(22)-H(22)...O(63)#1 | 0.86   | 2.11     | 2.928(6) | 159.7  |
| N(62)-H(62)...O(23)#2 | 0.86   | 2.15     | 2.952(6) | 155.6  |

Symmetry transformations used to generate equivalent atoms:

#1 x-1,y-1,z #2 x+1,y+1,z

**6.  $^{13}\text{C}$  NMR and  $^1\text{H}$  NMR spectra for compounds 1-7 and 9-22**



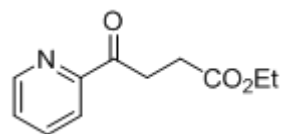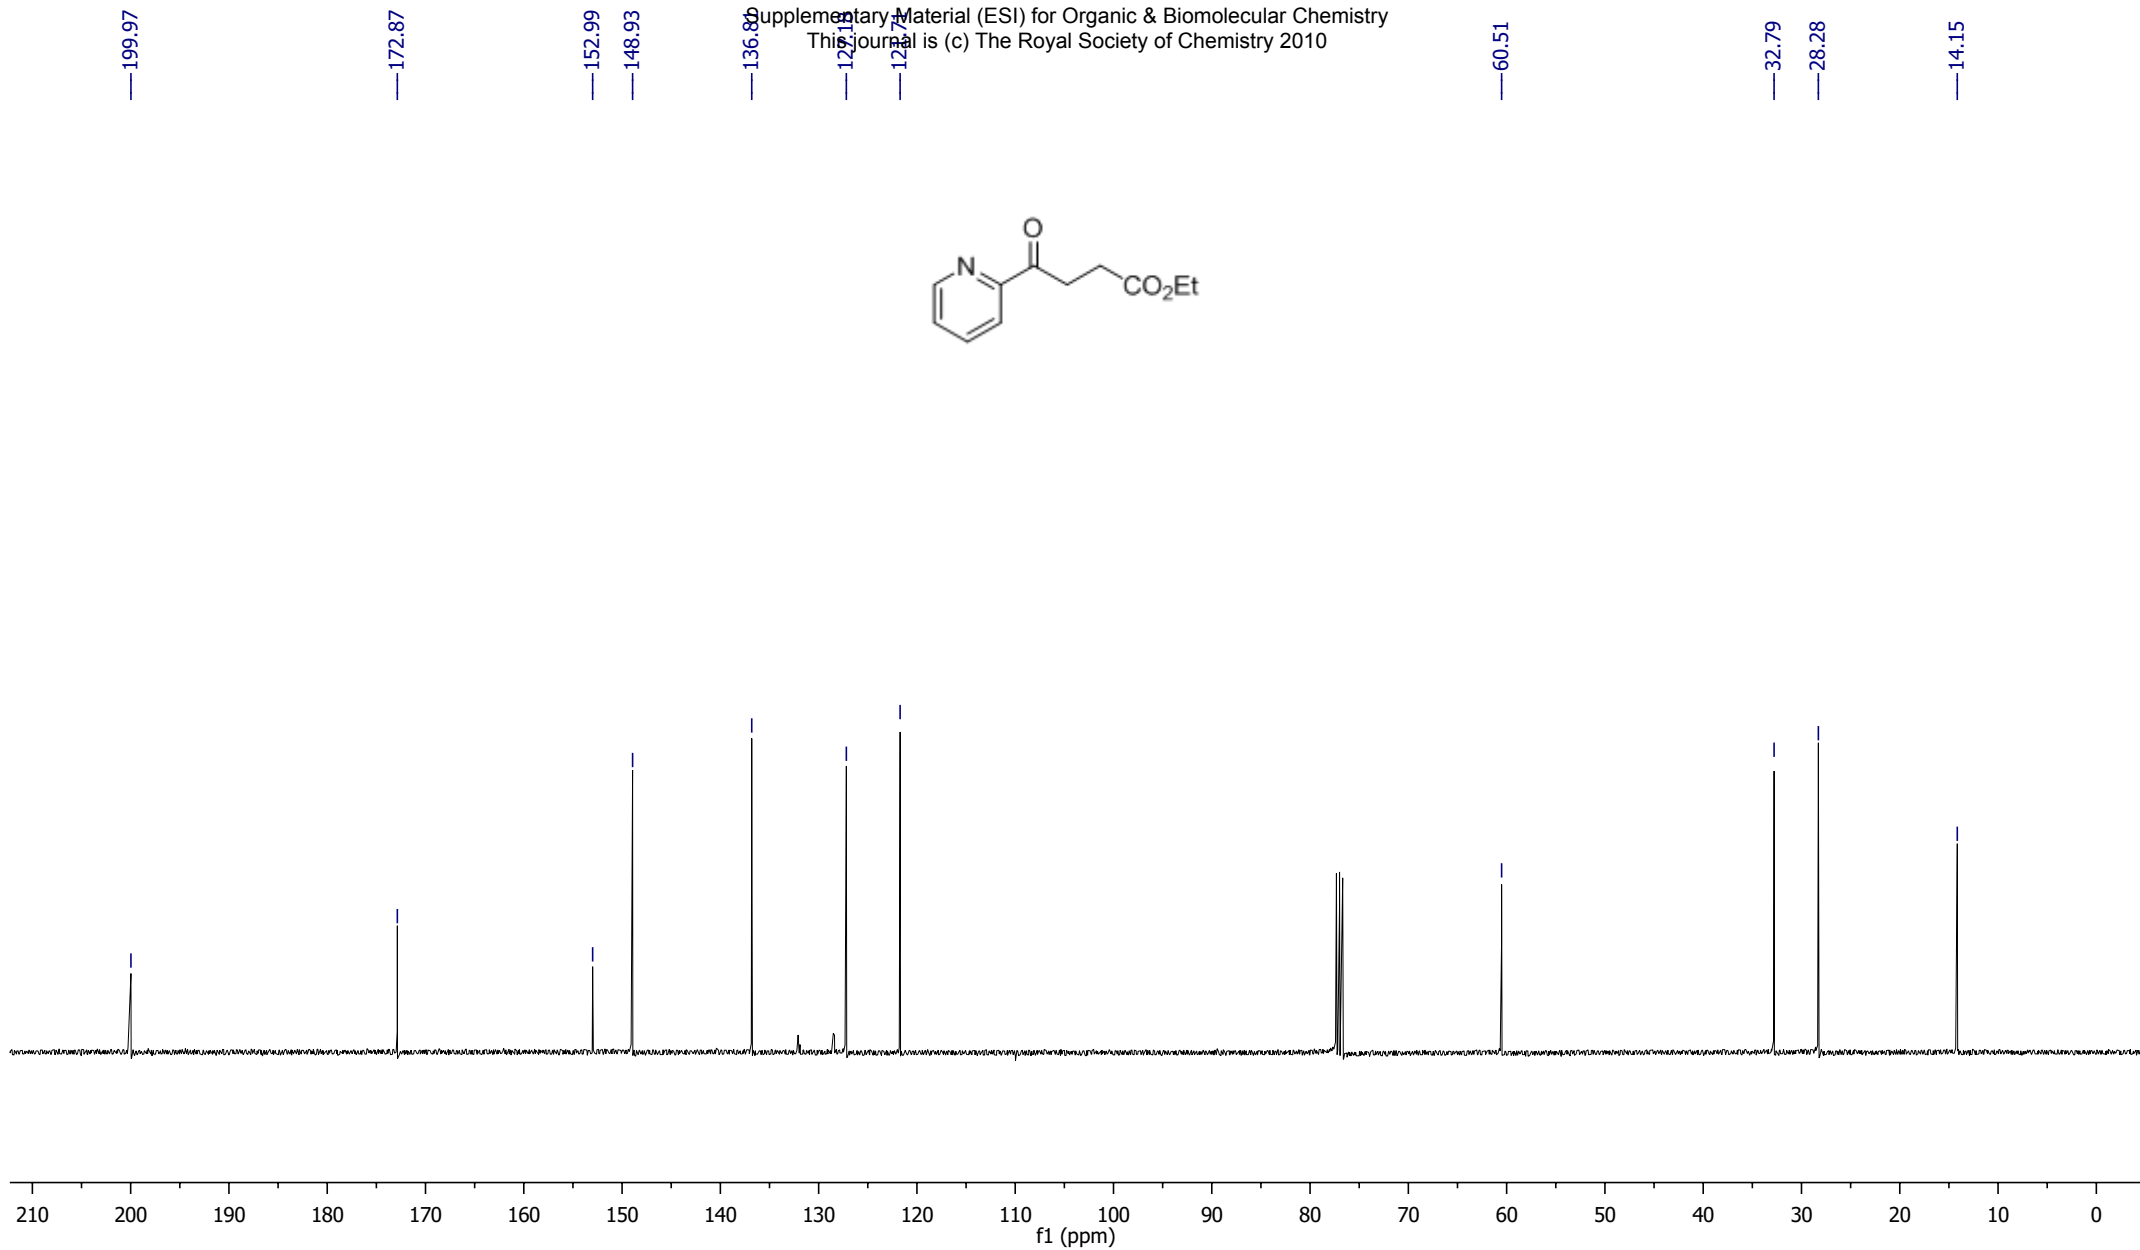

**Ethyl  $\gamma$ -oxo-2-pyridinebutanoate (1a)**

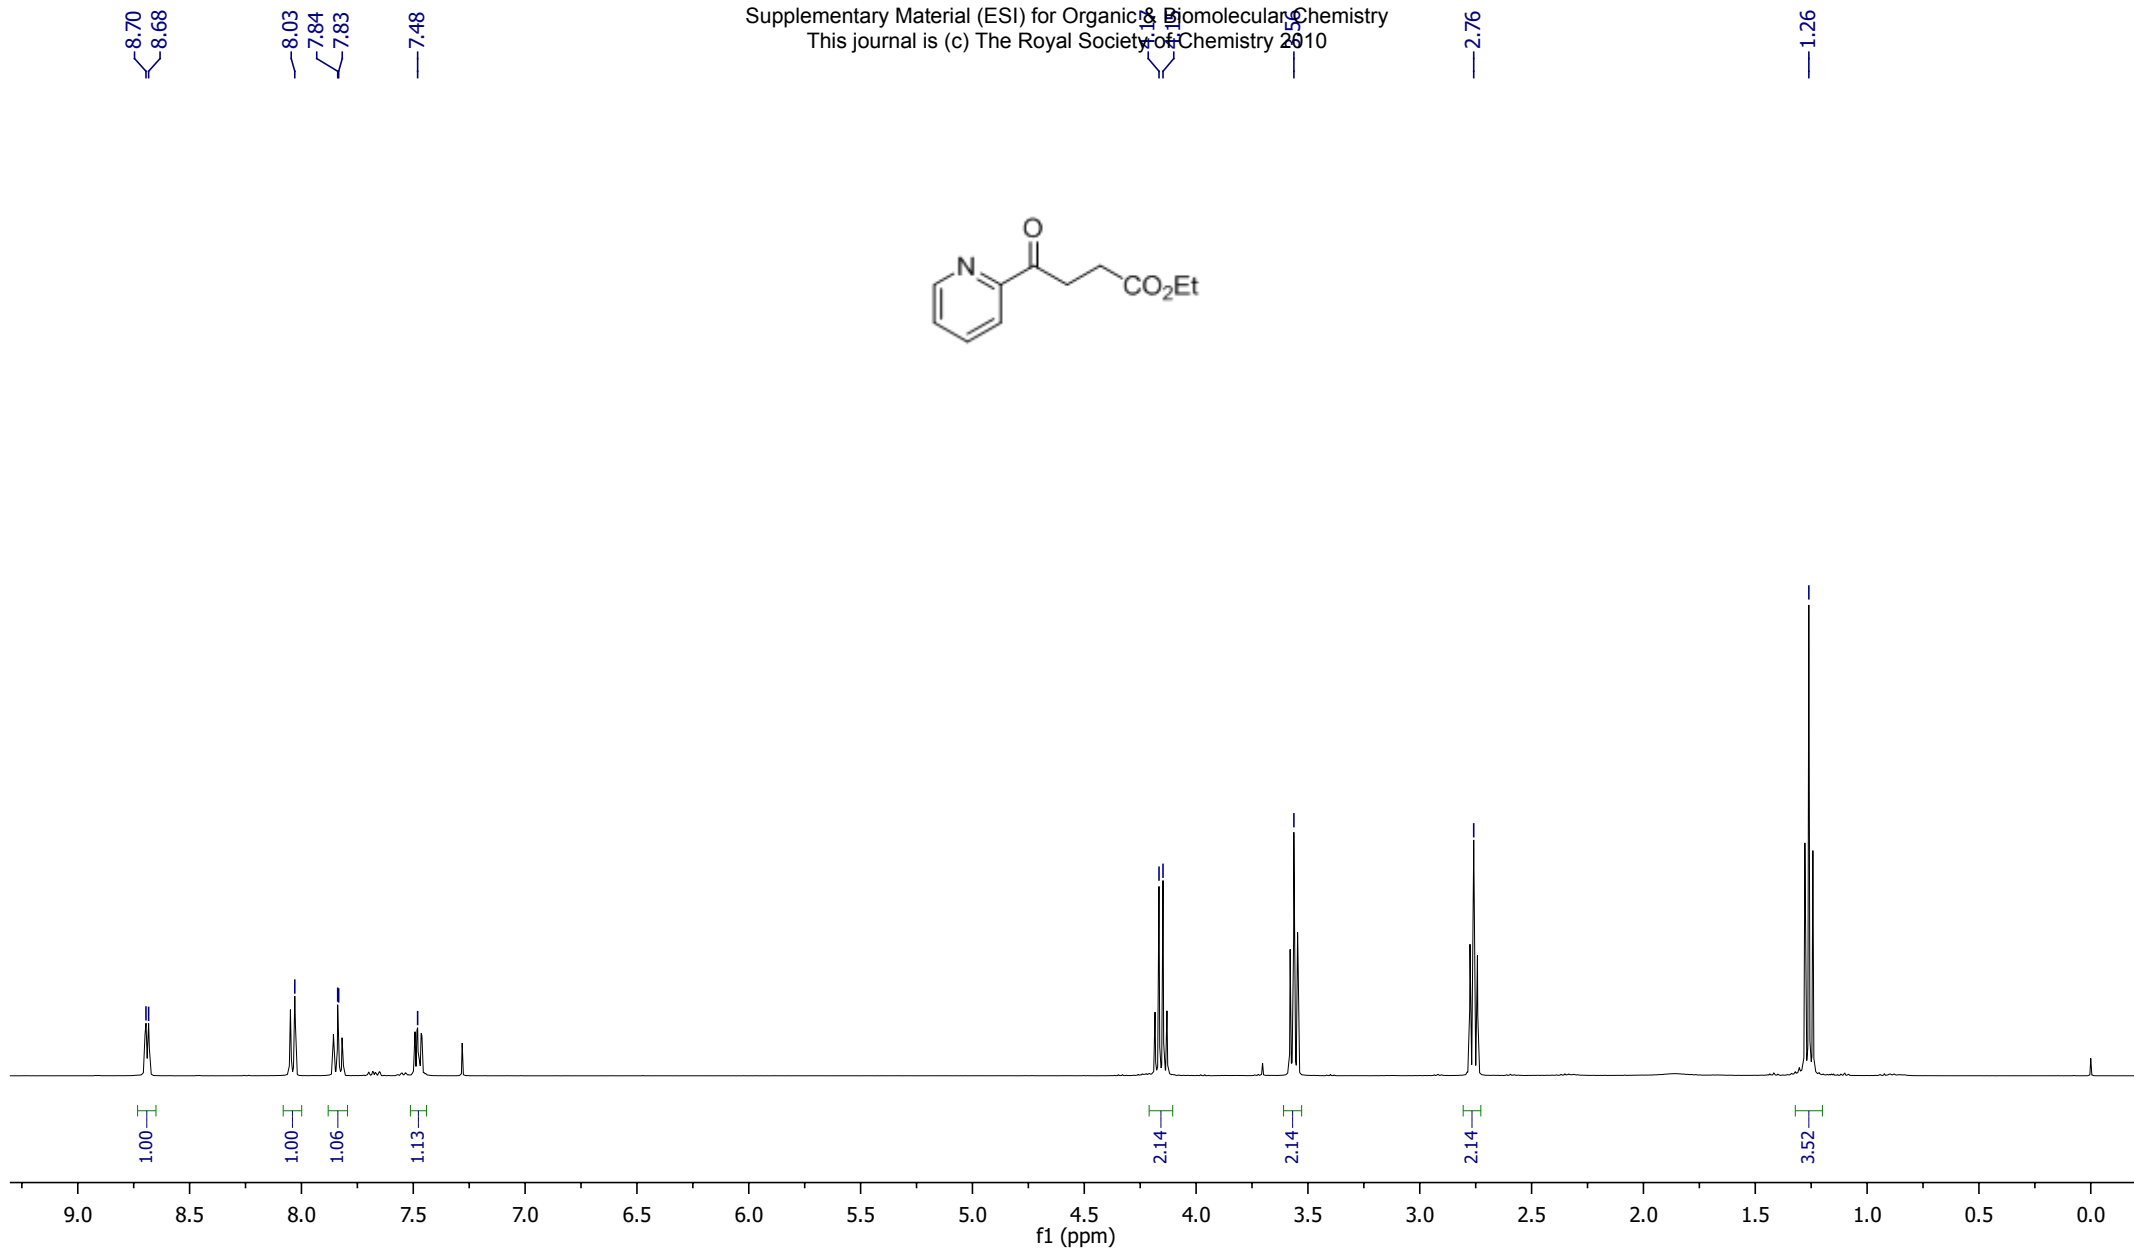

**Ethyl  $\gamma$ -oxo-2-pyridinebutanoate (1a)**

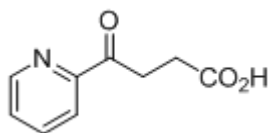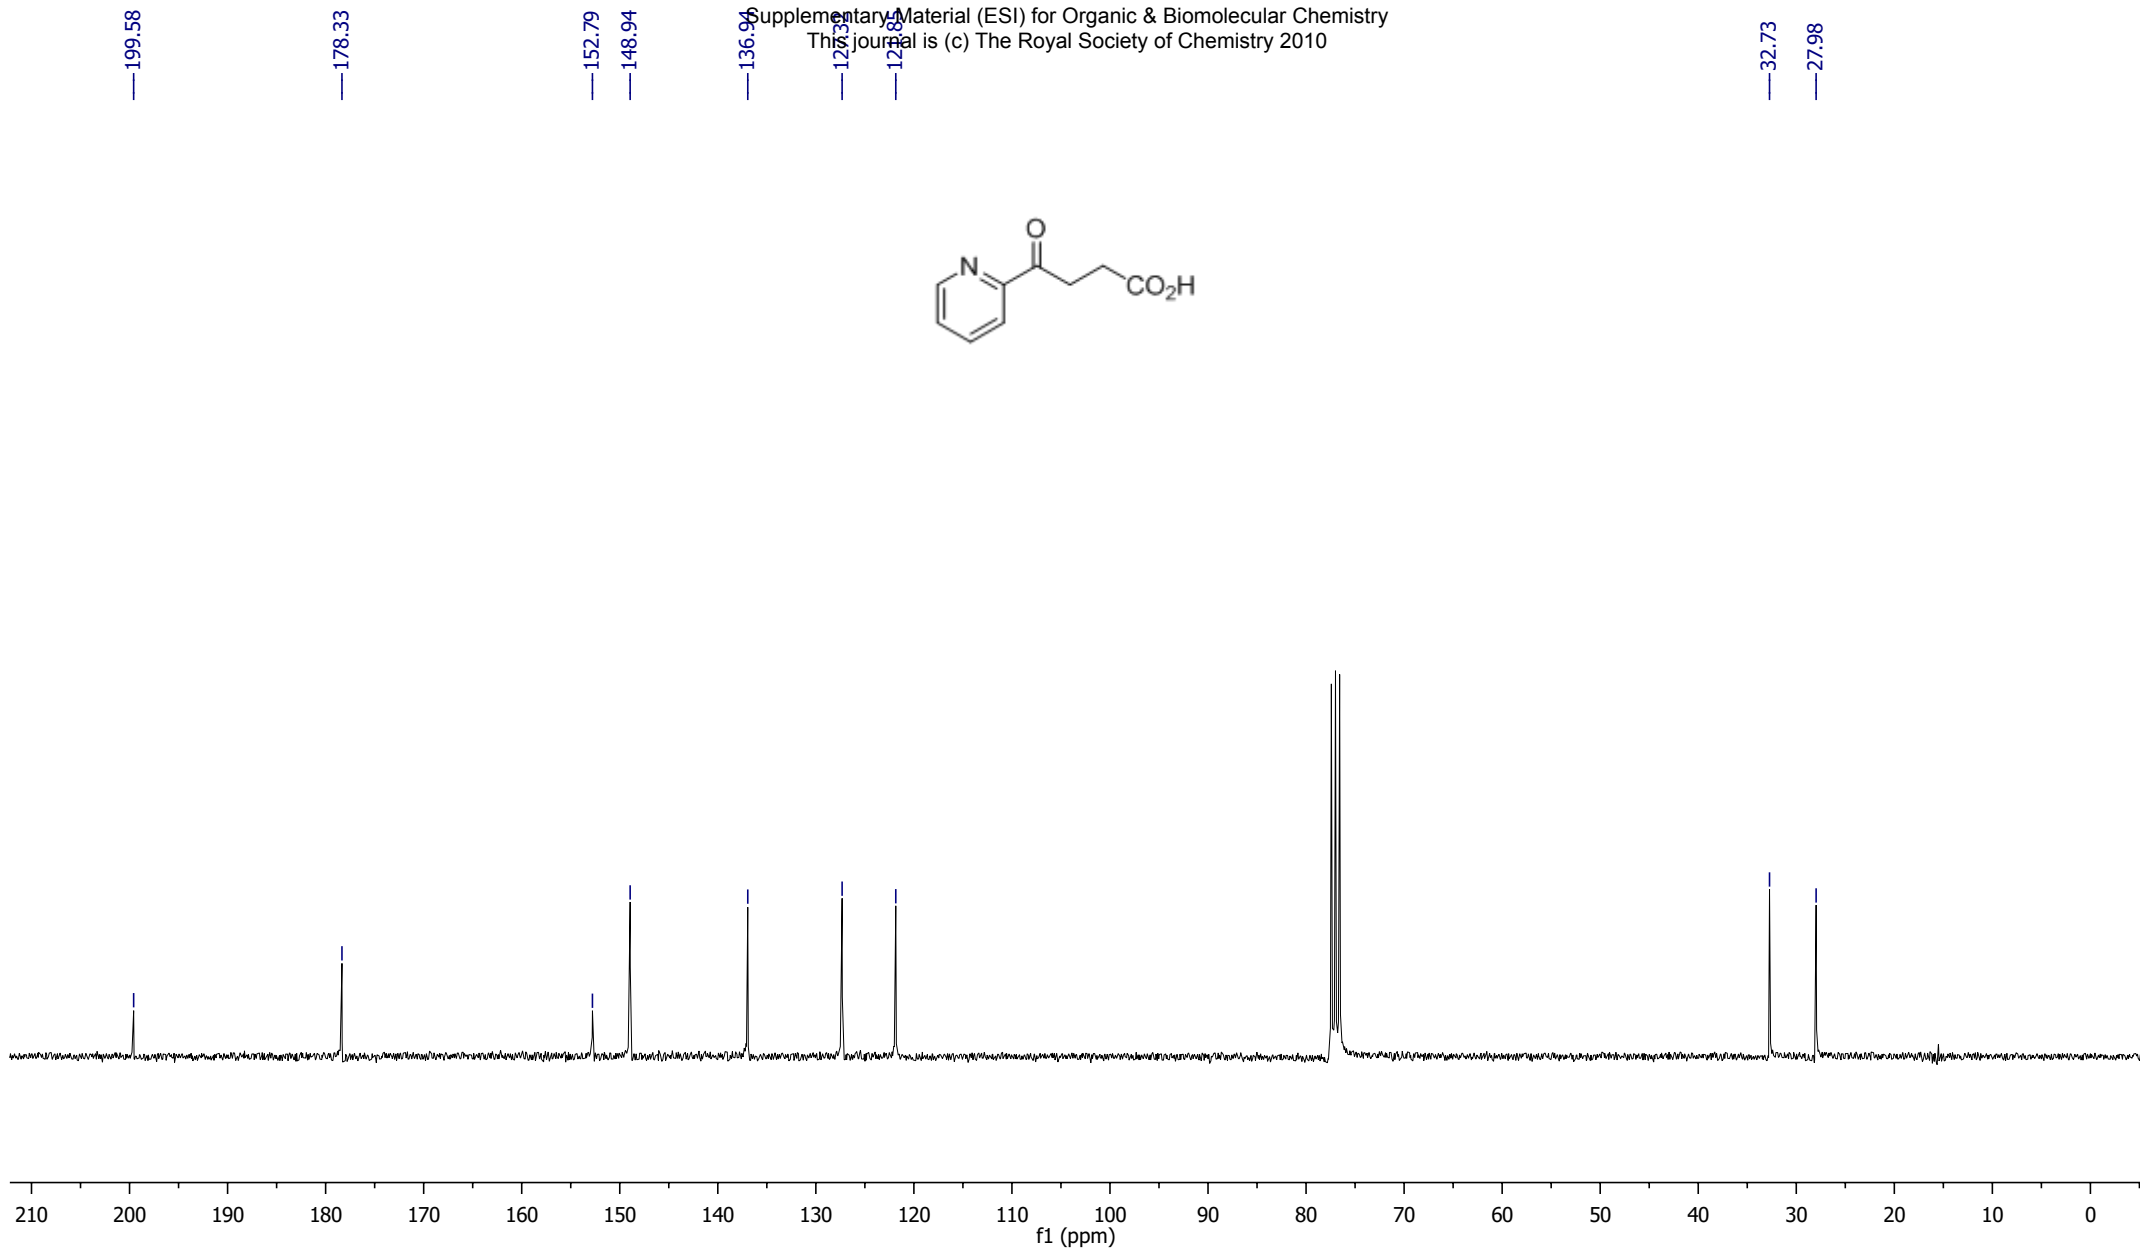

**$\gamma$ -Oxo-2-pyridinebutanoic acid (1b)**

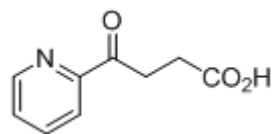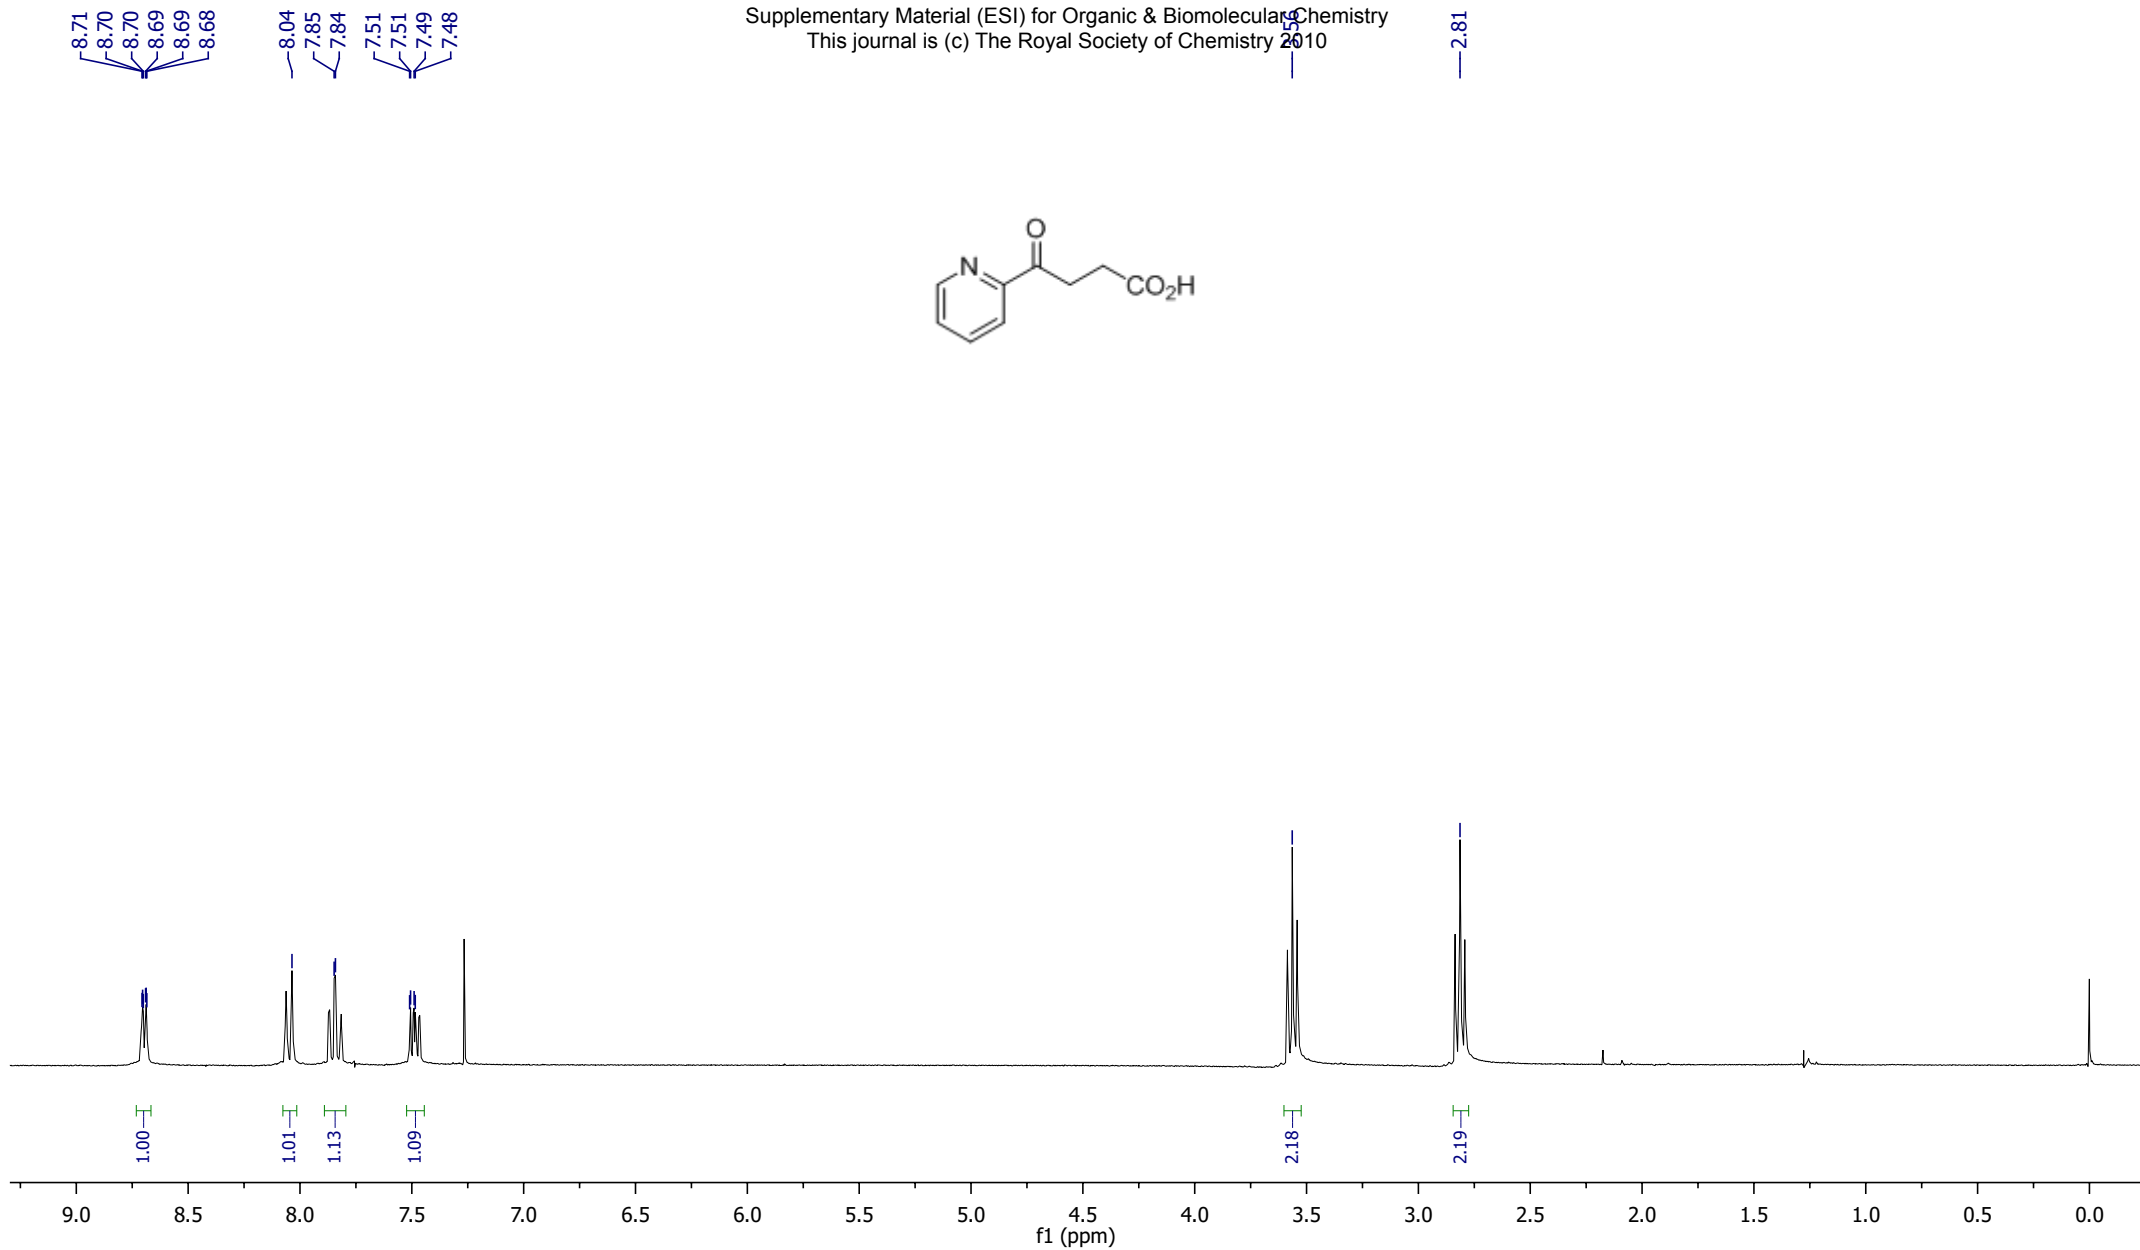

**$\gamma$ -Oxo-2-pyridinebutanoic acid (1b)**

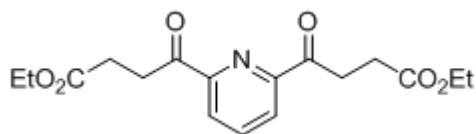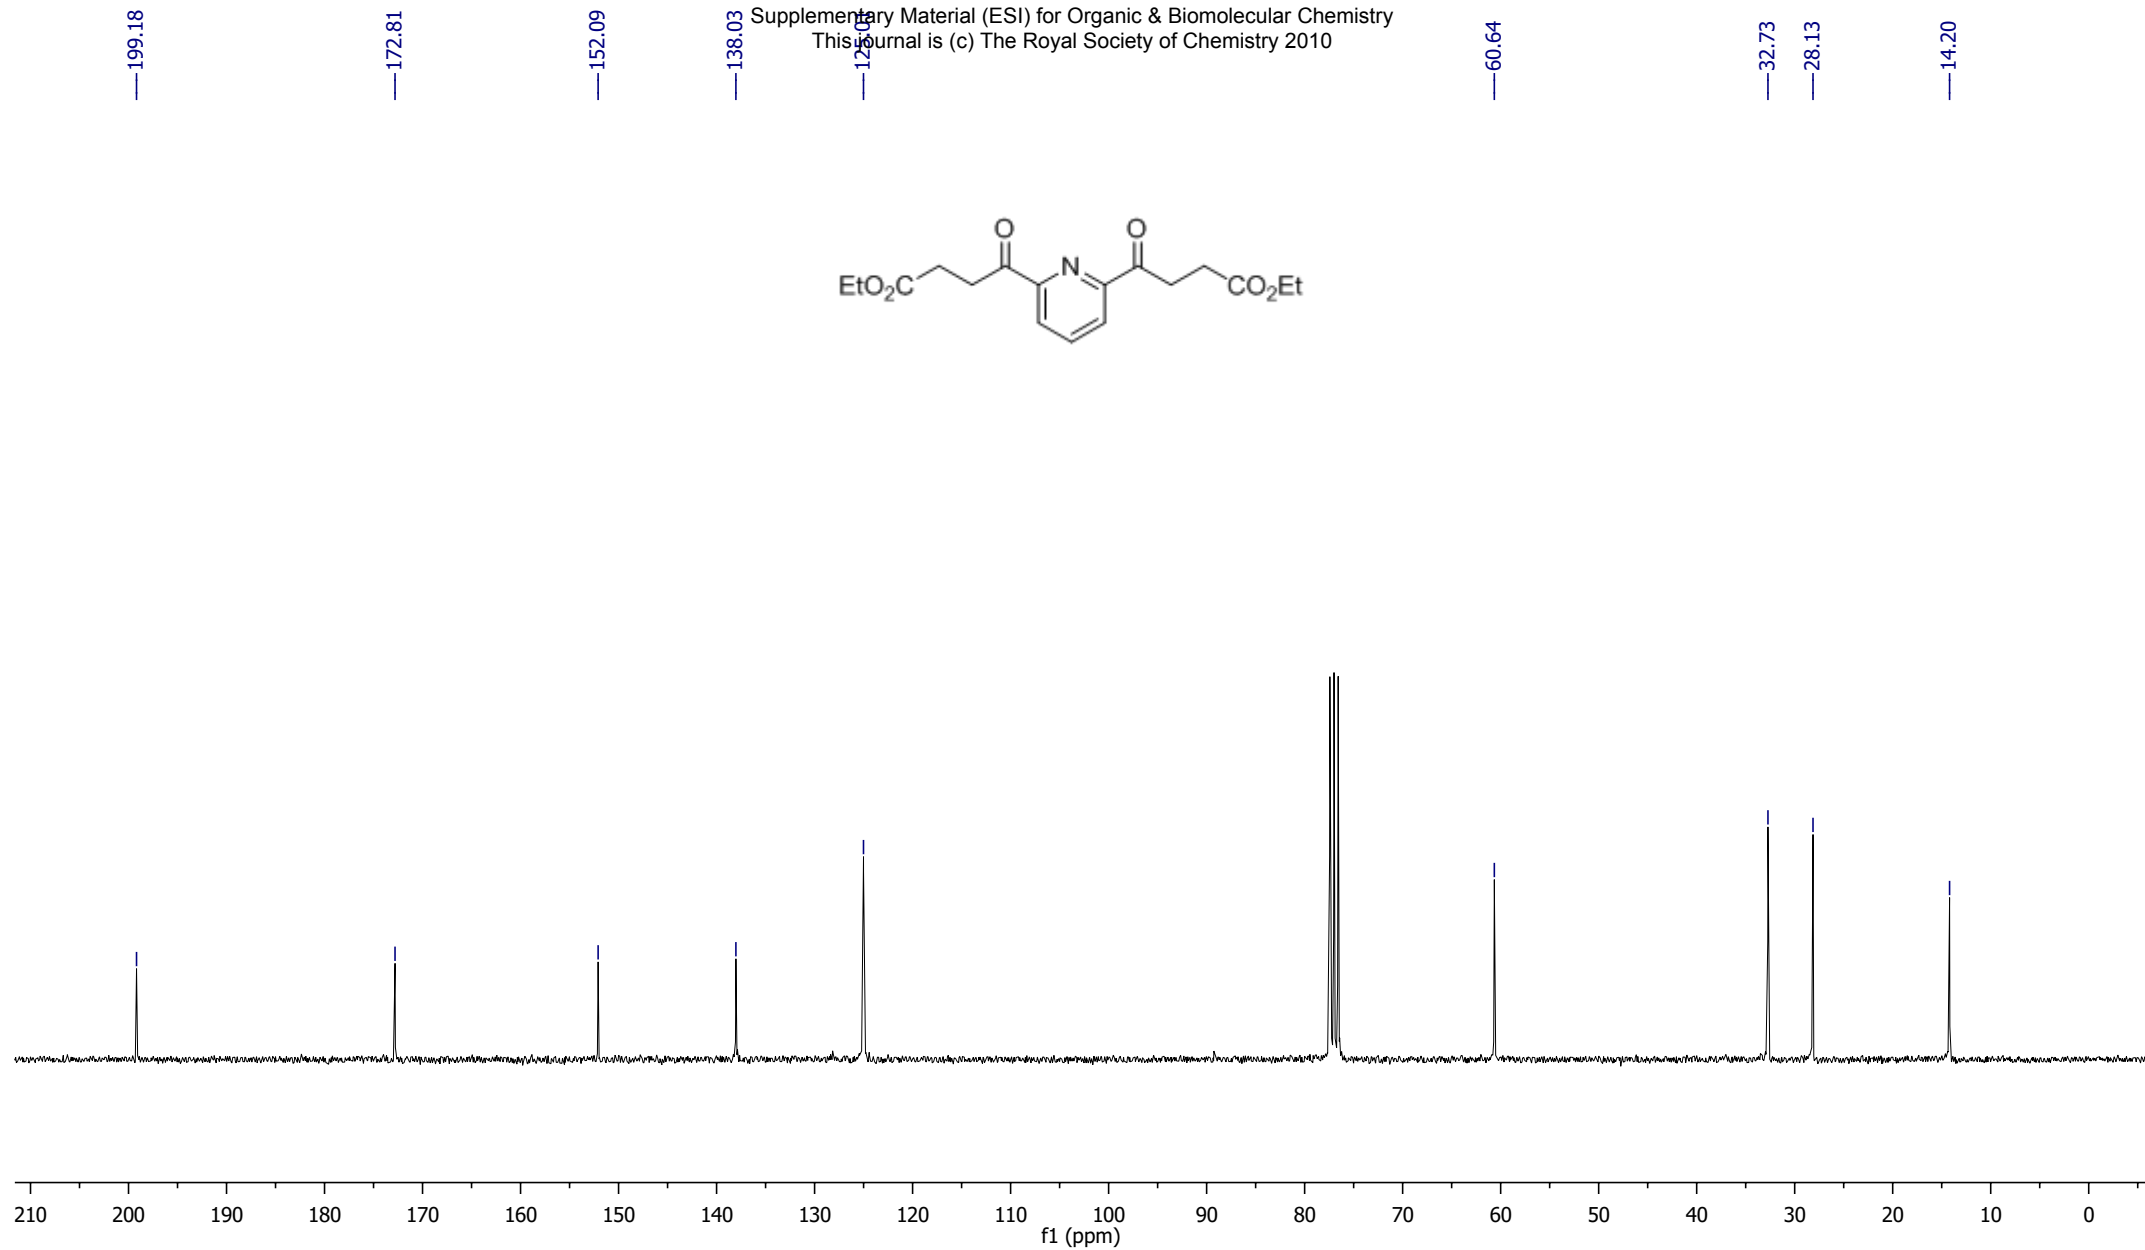

**Diethyl  $\gamma,\gamma'$ -dioxo-2,6-pyridinedibutanoate (2a)**

8.21  
8.21  
8.02  
8.00

2.79

1.28

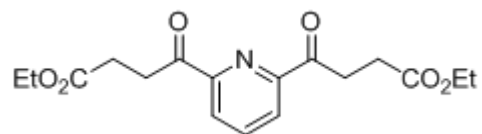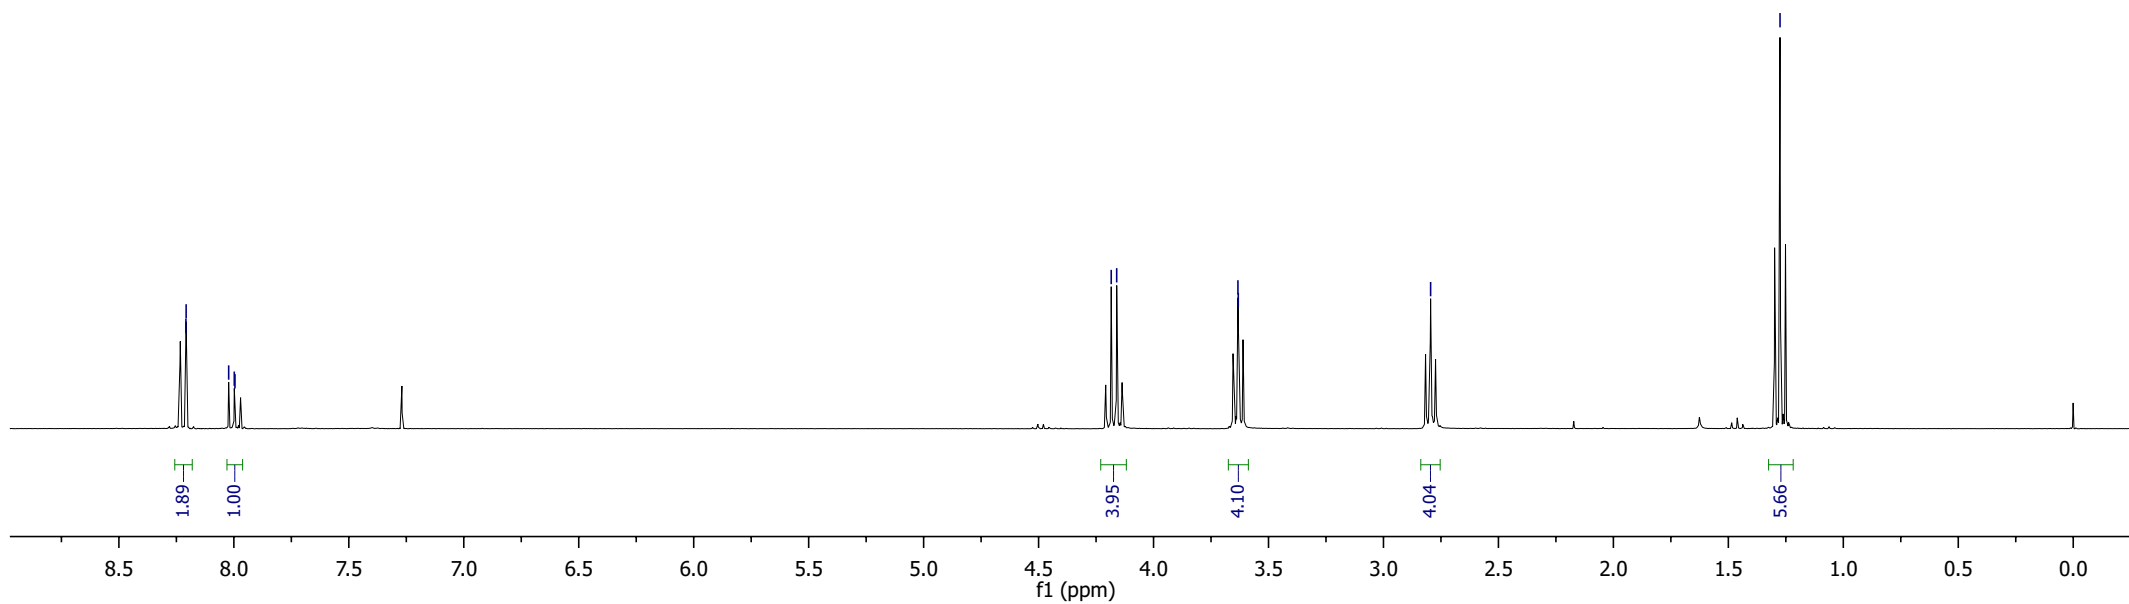

Diethyl  $\gamma,\gamma'$ -dioxo-2,6-pyridinedibutanoate (2a)

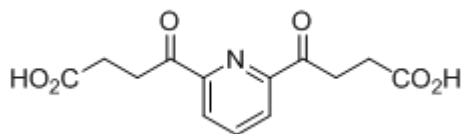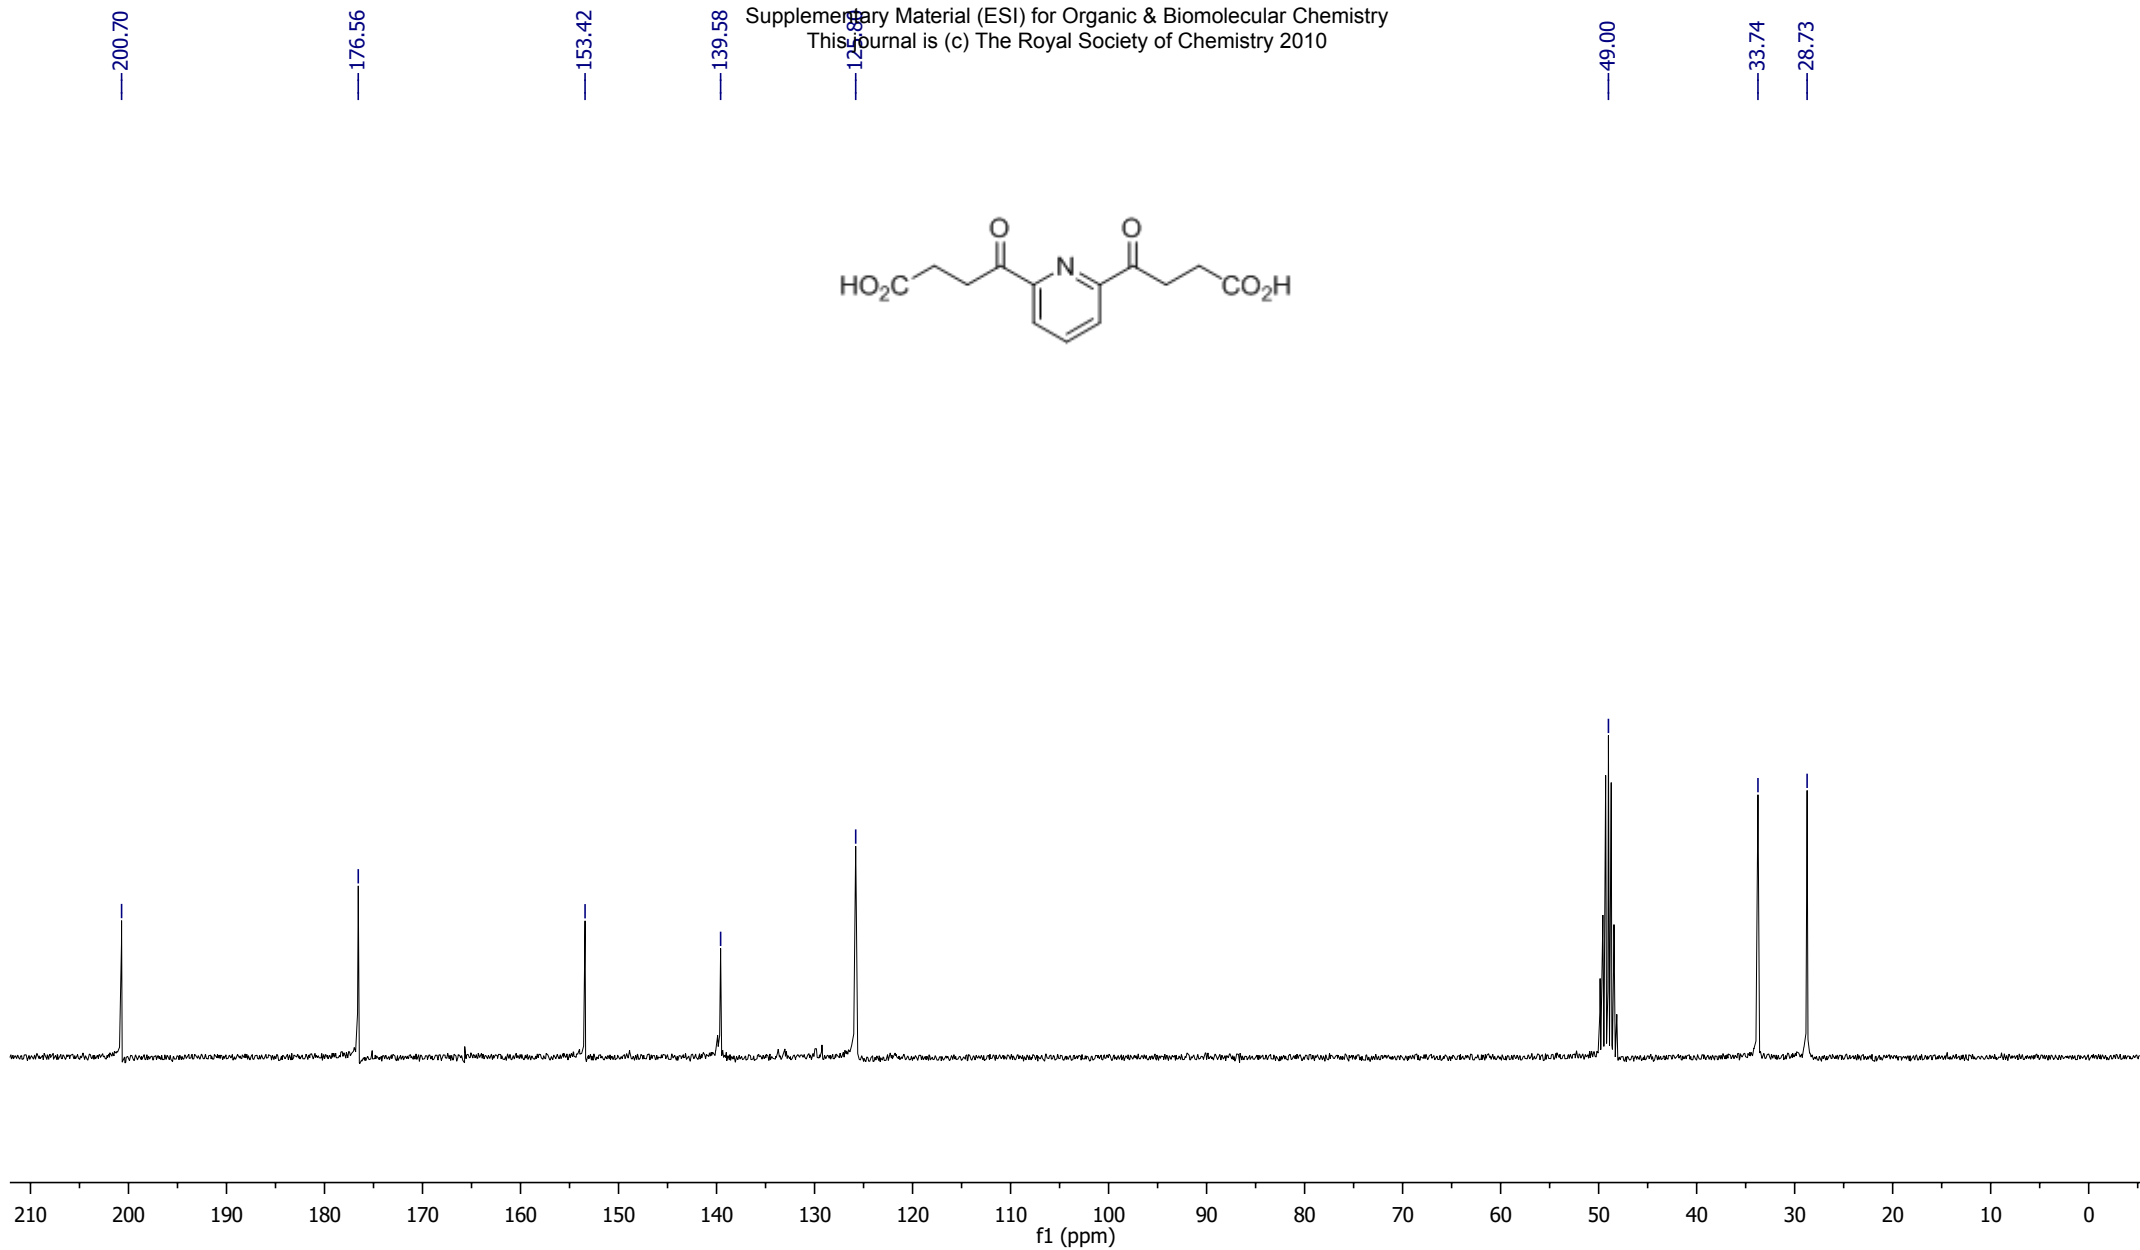

**$\gamma,\gamma'$ -Dioxo-2,6-pyridinedibutanoic acid (2b)**

8.22  
8.22  
8.20  
8.14

2.76

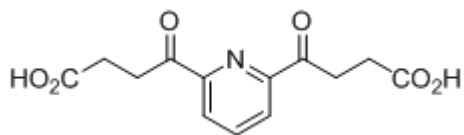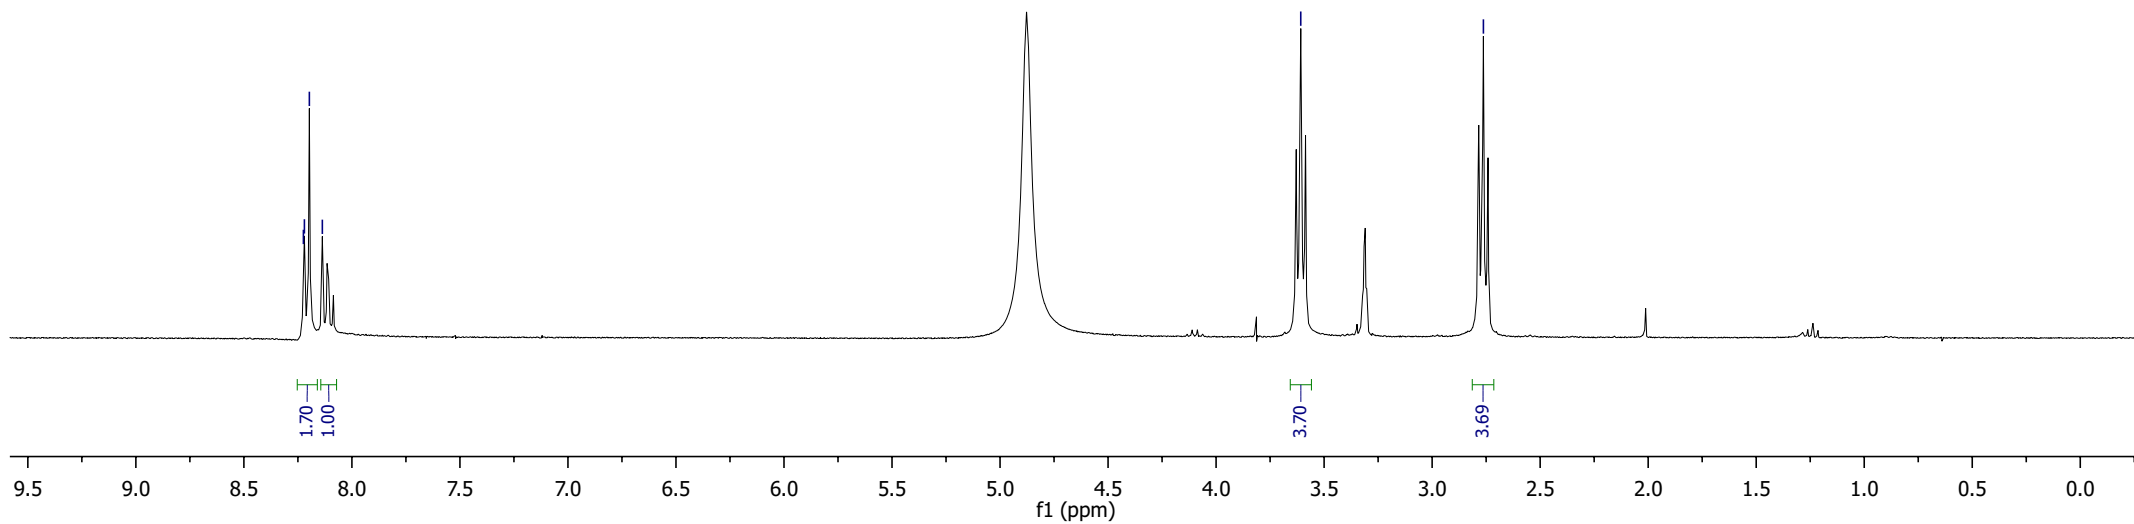

**$\gamma,\gamma'$ -Dioxo-2,6-pyridinedibutanoic acid (2b)**



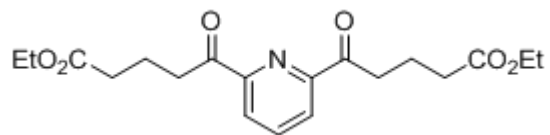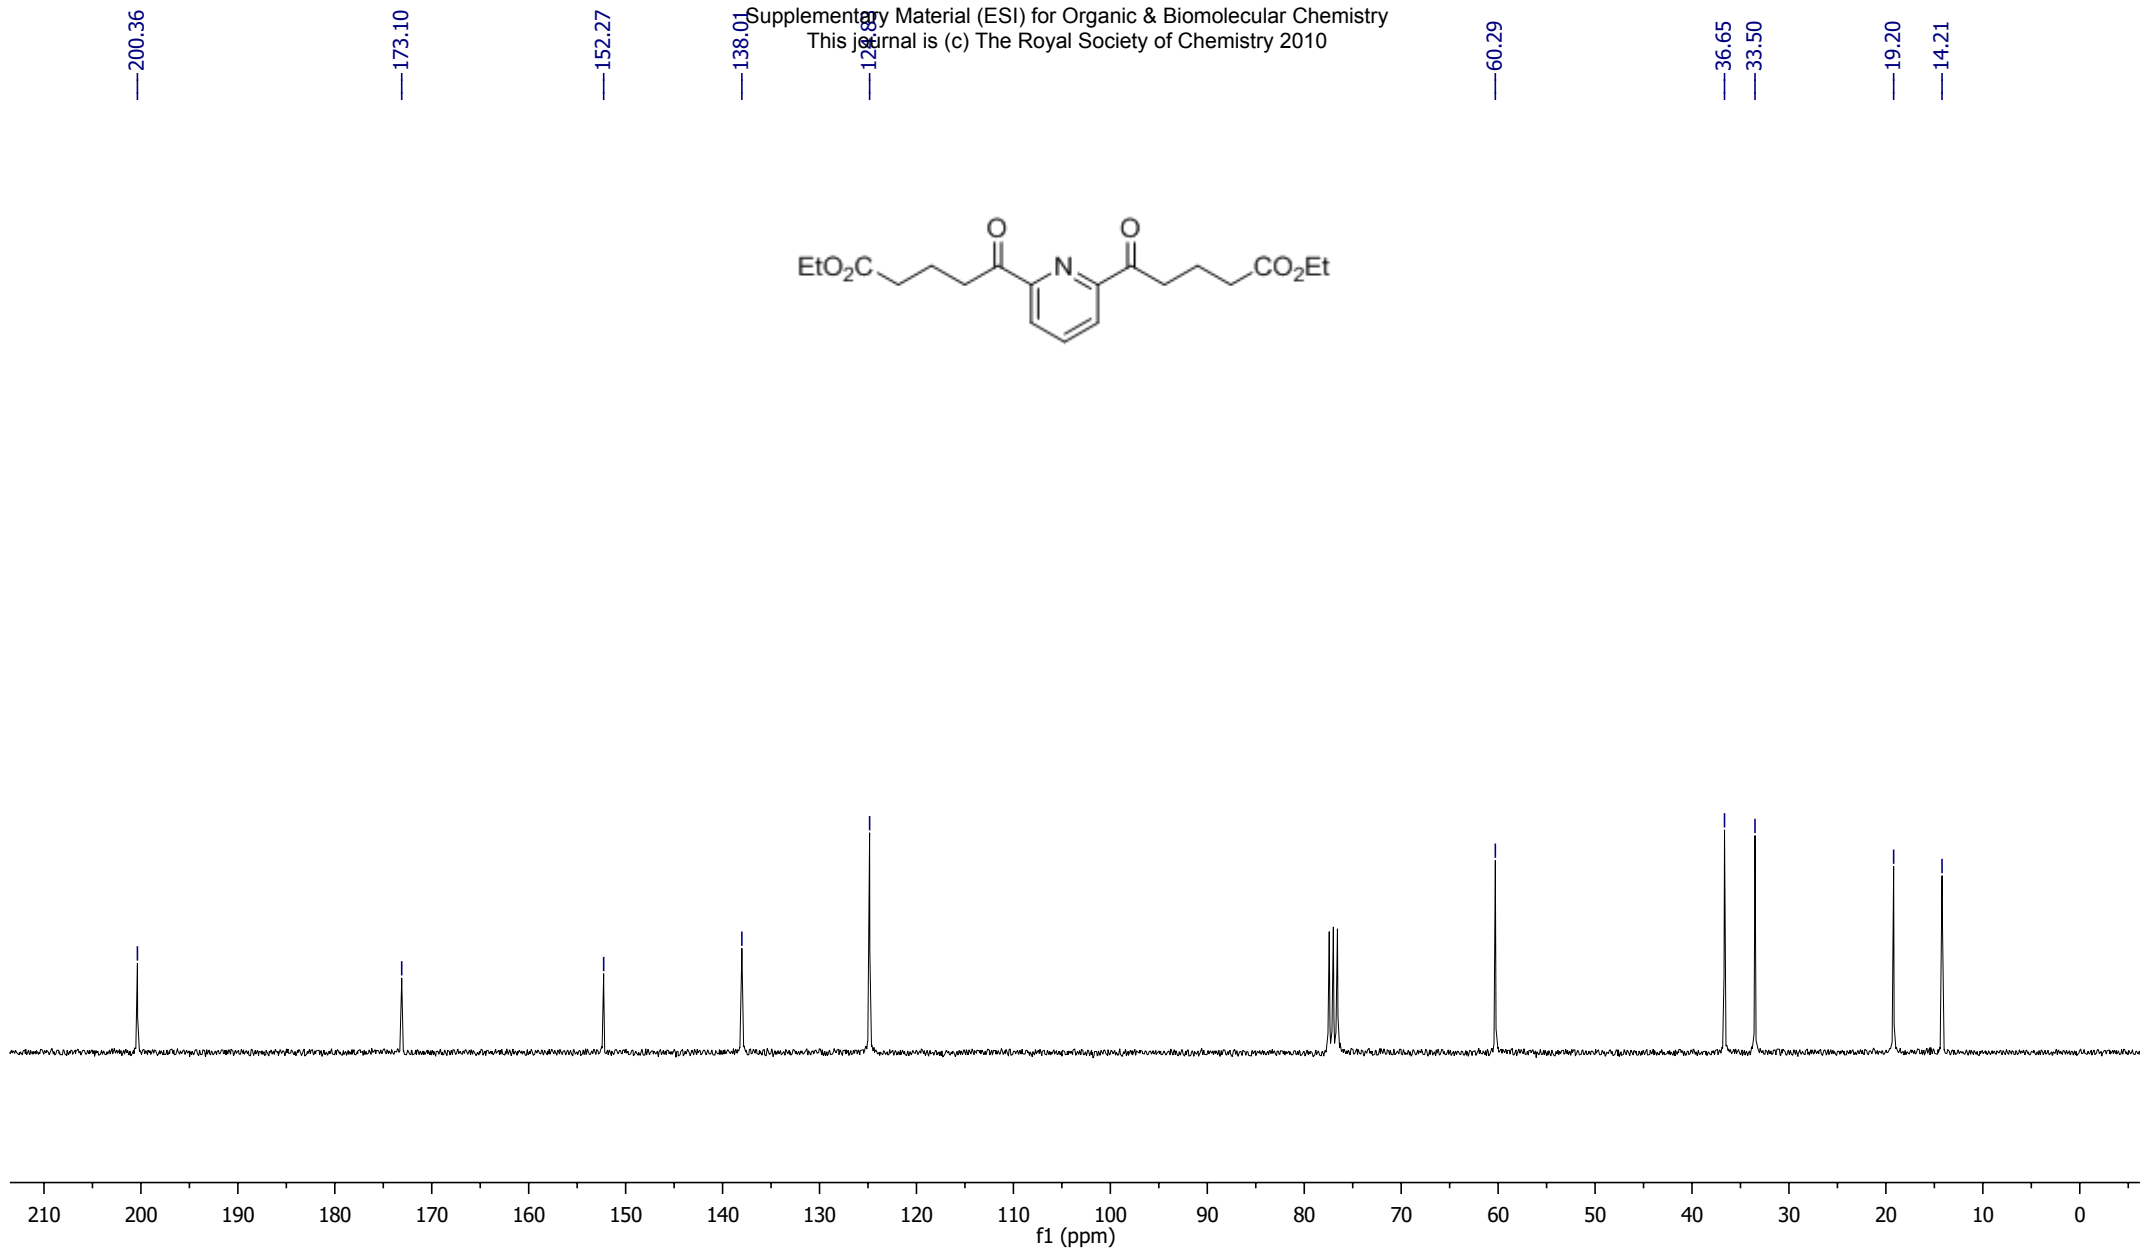

**Diethyl  $\delta,\delta'$ -dioxo-2,6-pyridinedipentanoate (3a)**

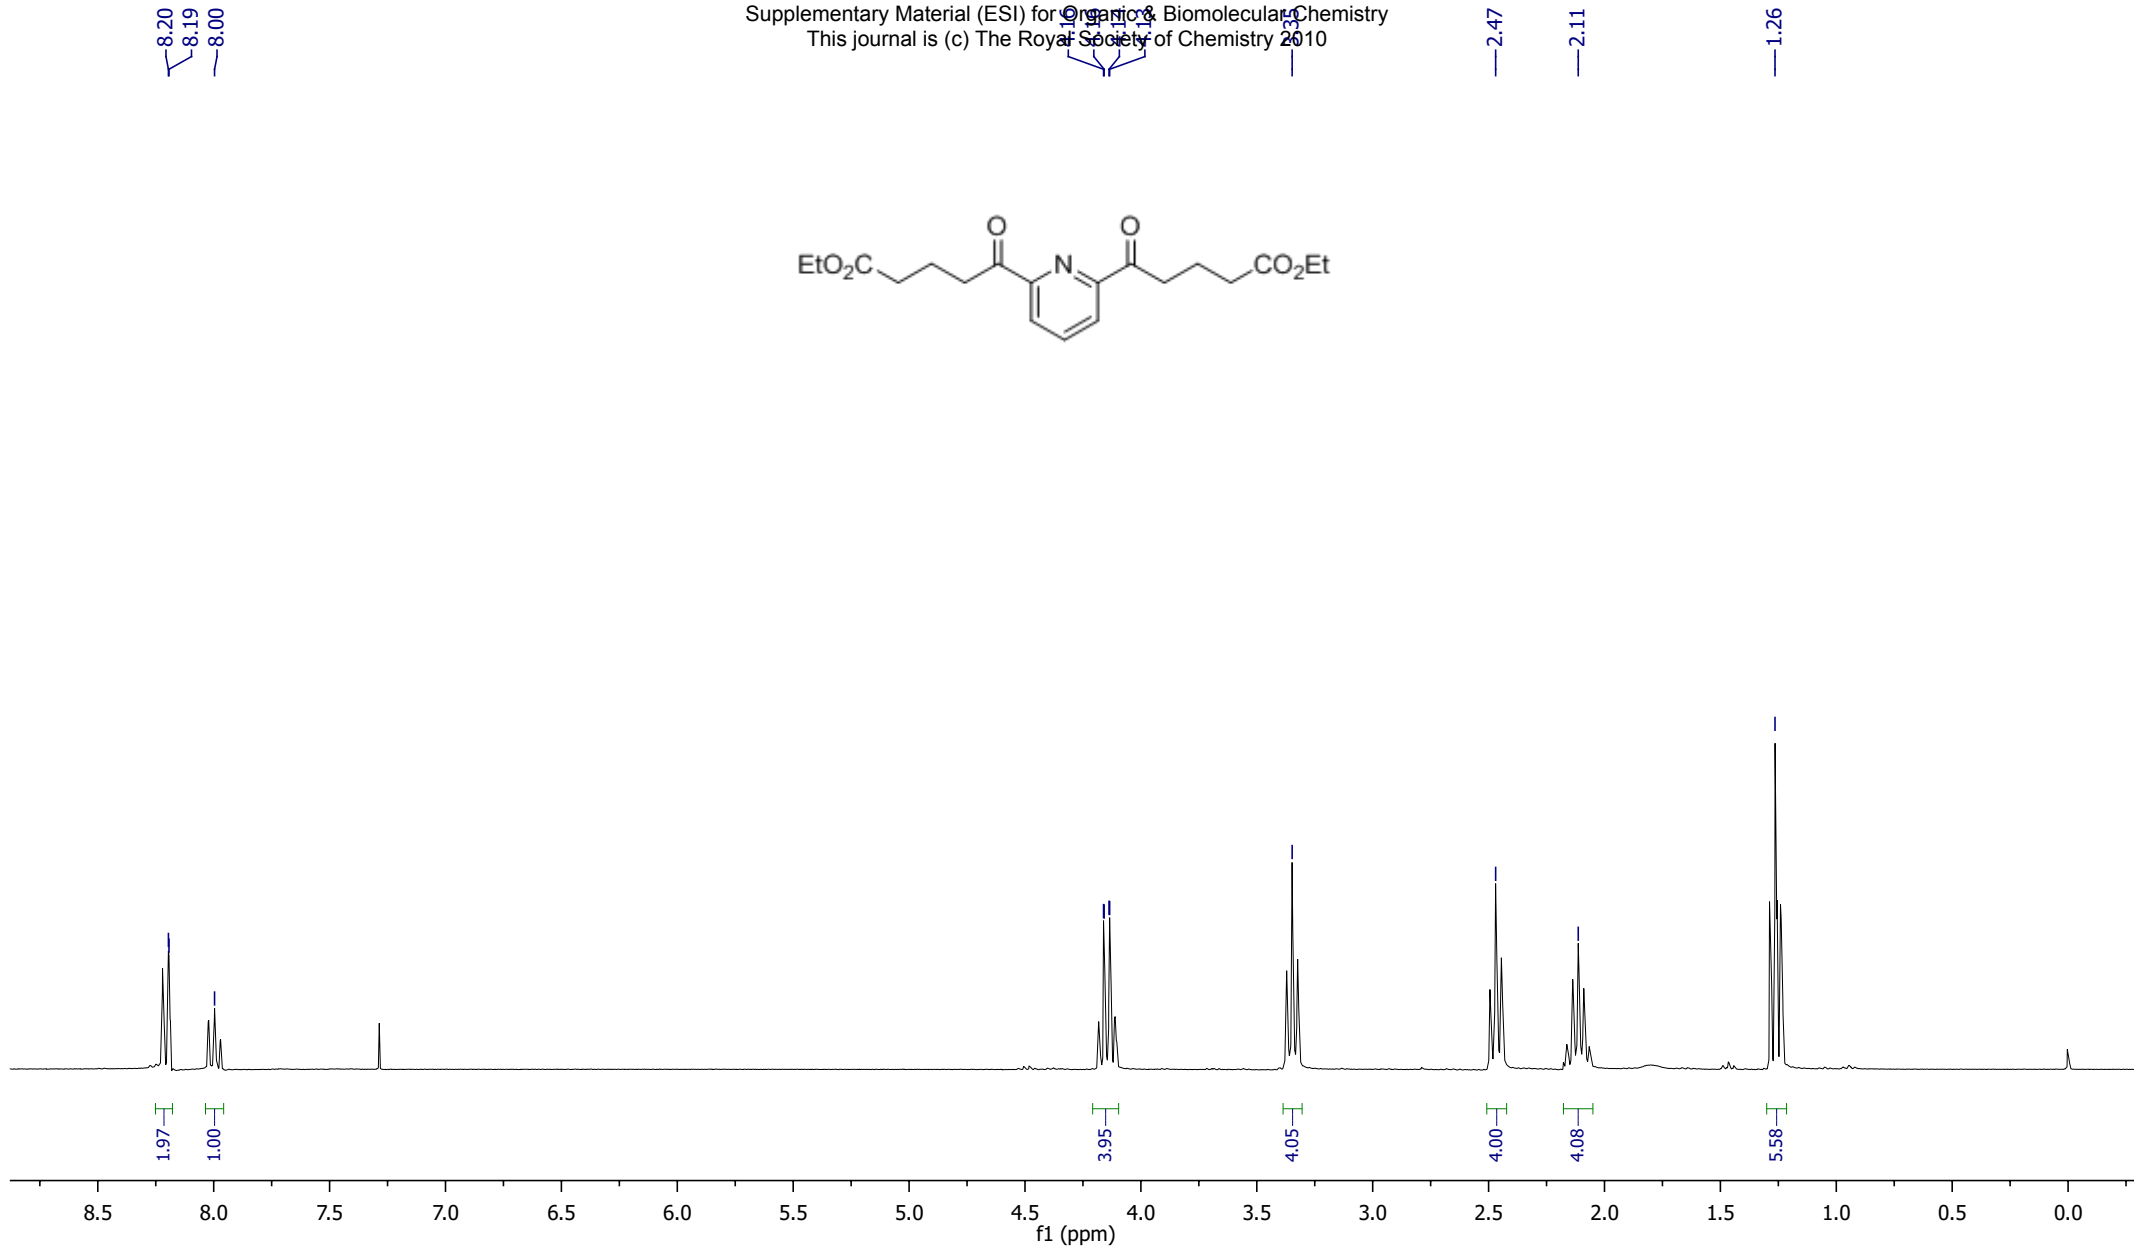

Diethyl  $\delta,\delta'$ -dioxo-2,6-pyridinedipentanoate (3a)

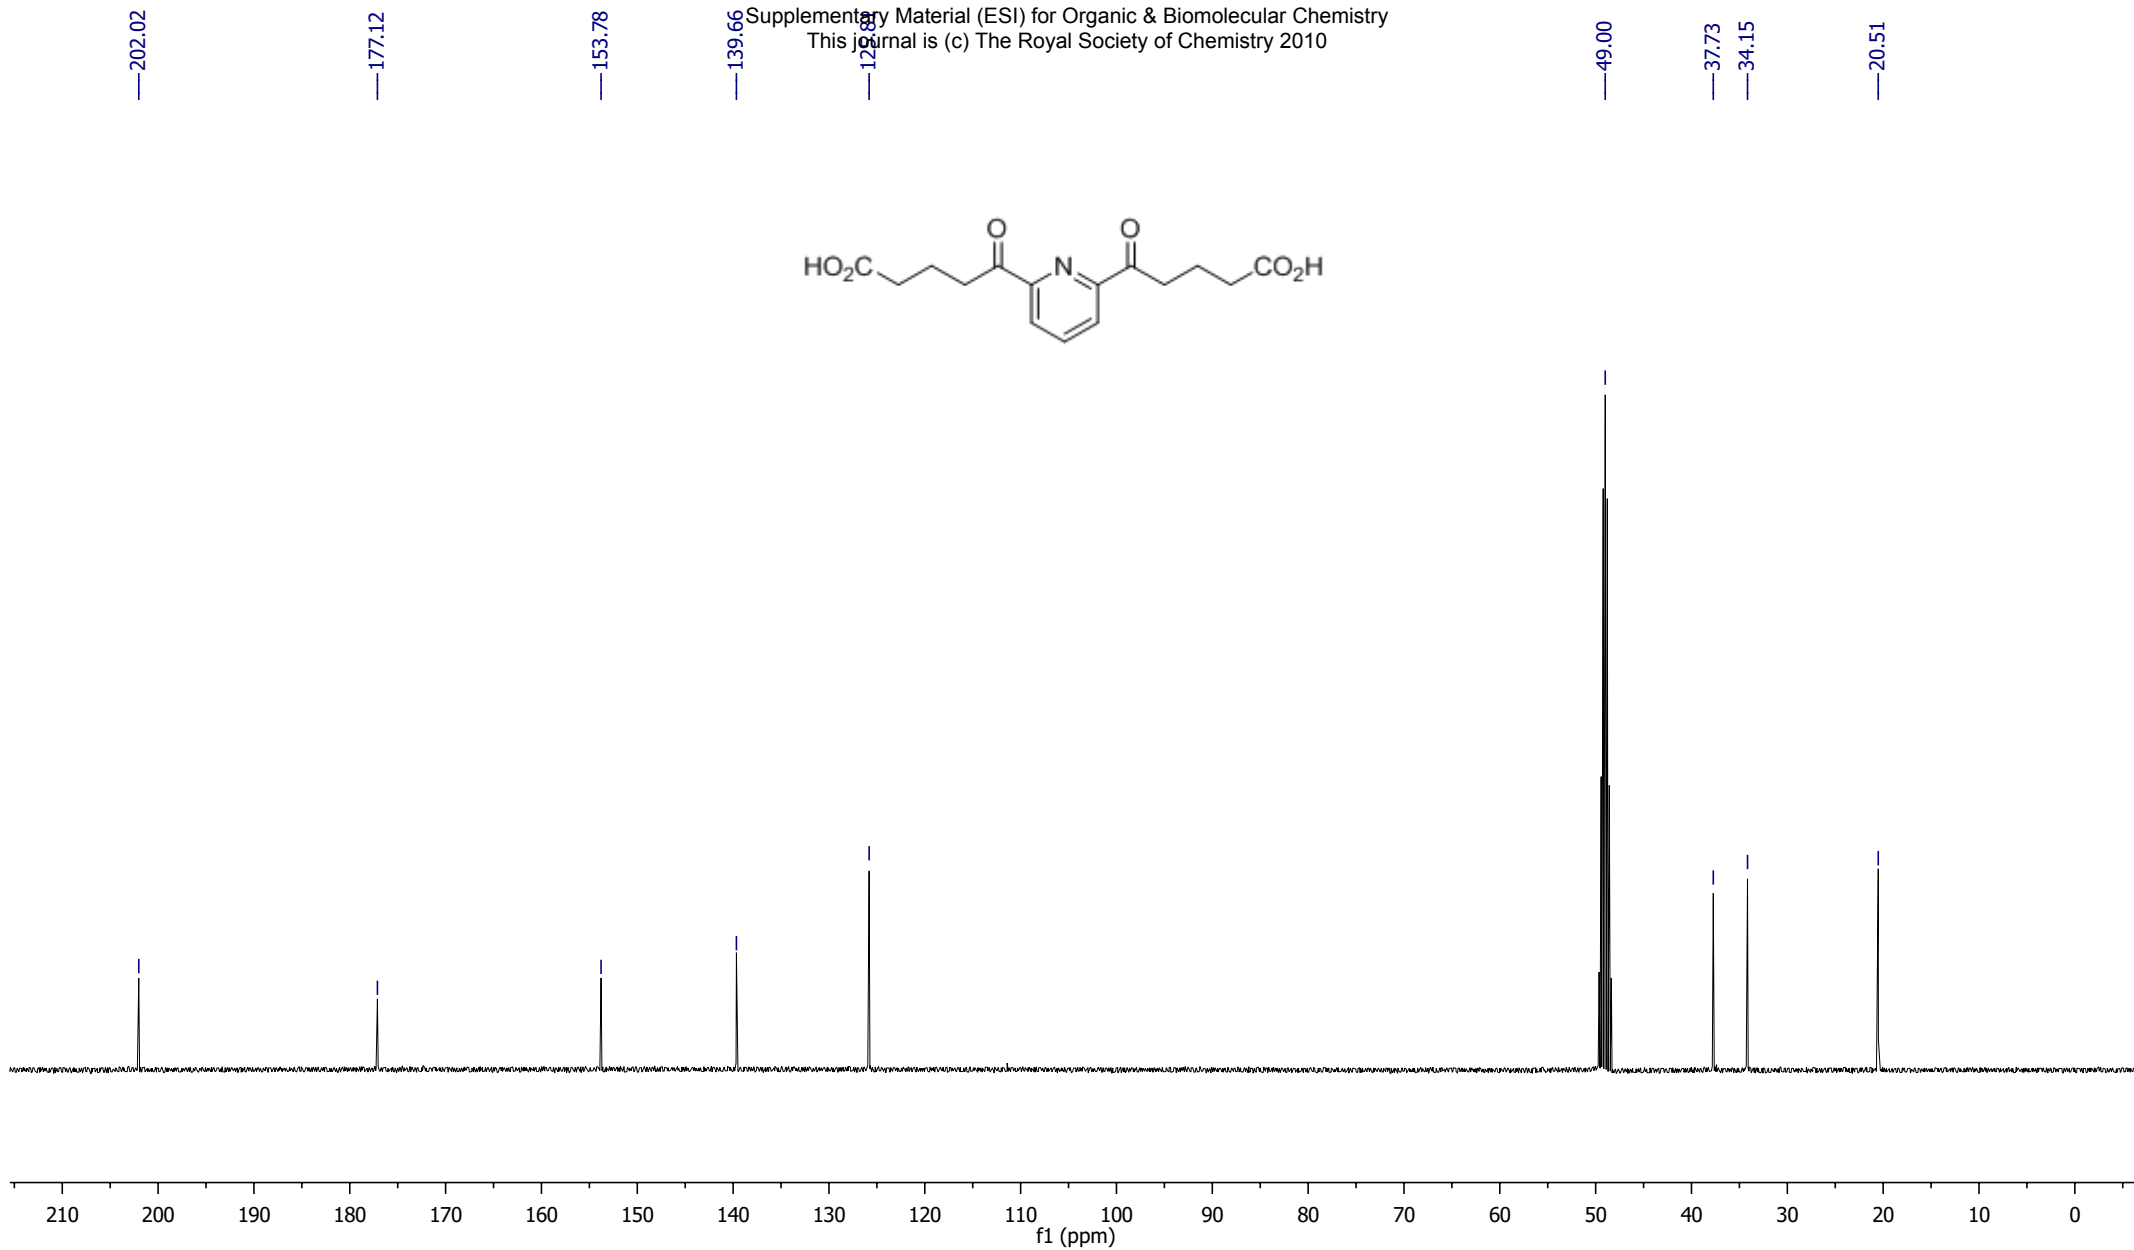

**$\delta,\delta'$ -Dioxo-2,6-pyridinedipentanoic acid (3b)**

8.18  
8.12  
8.10

3.98

2.44

2.04

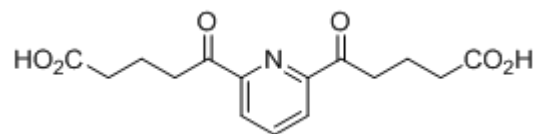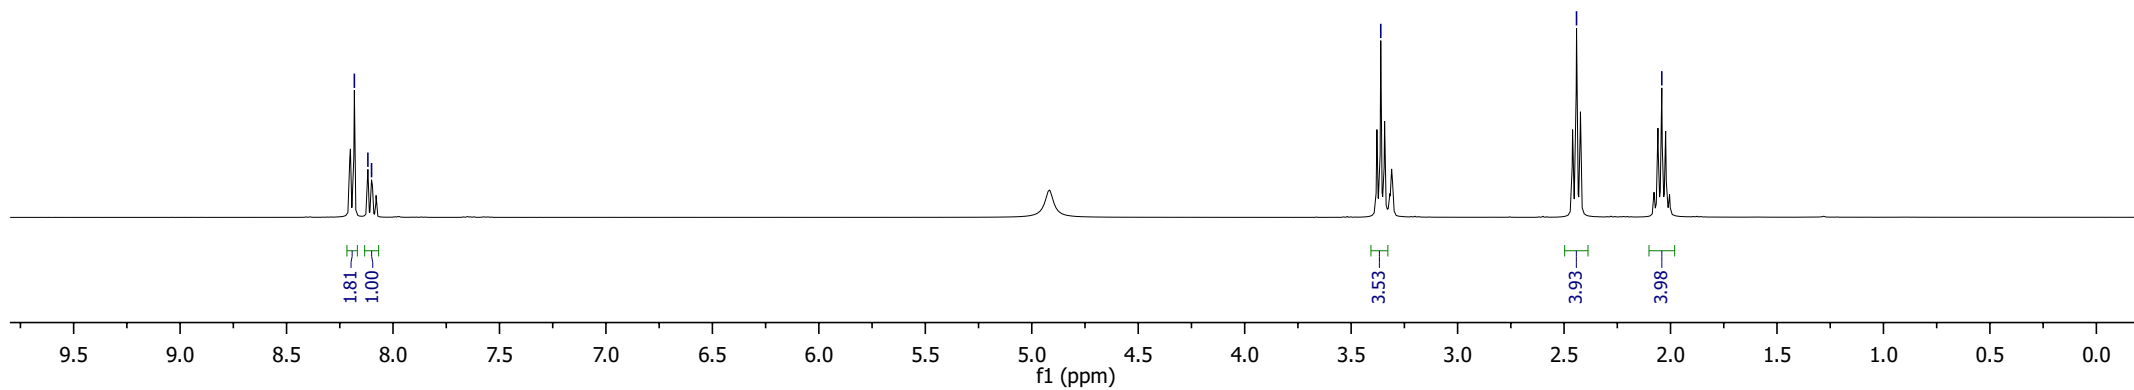

**$\delta,\delta'$ -Dioxo-2,6-pyridinedipentanoic acid (3b)**

—197.42

—172.68

—133.91

—131.73

—128.19

—127.25

—60.72

—33.52

—28.20

—14.17

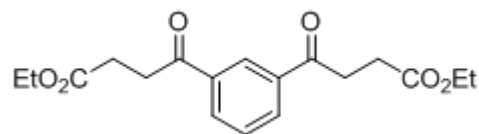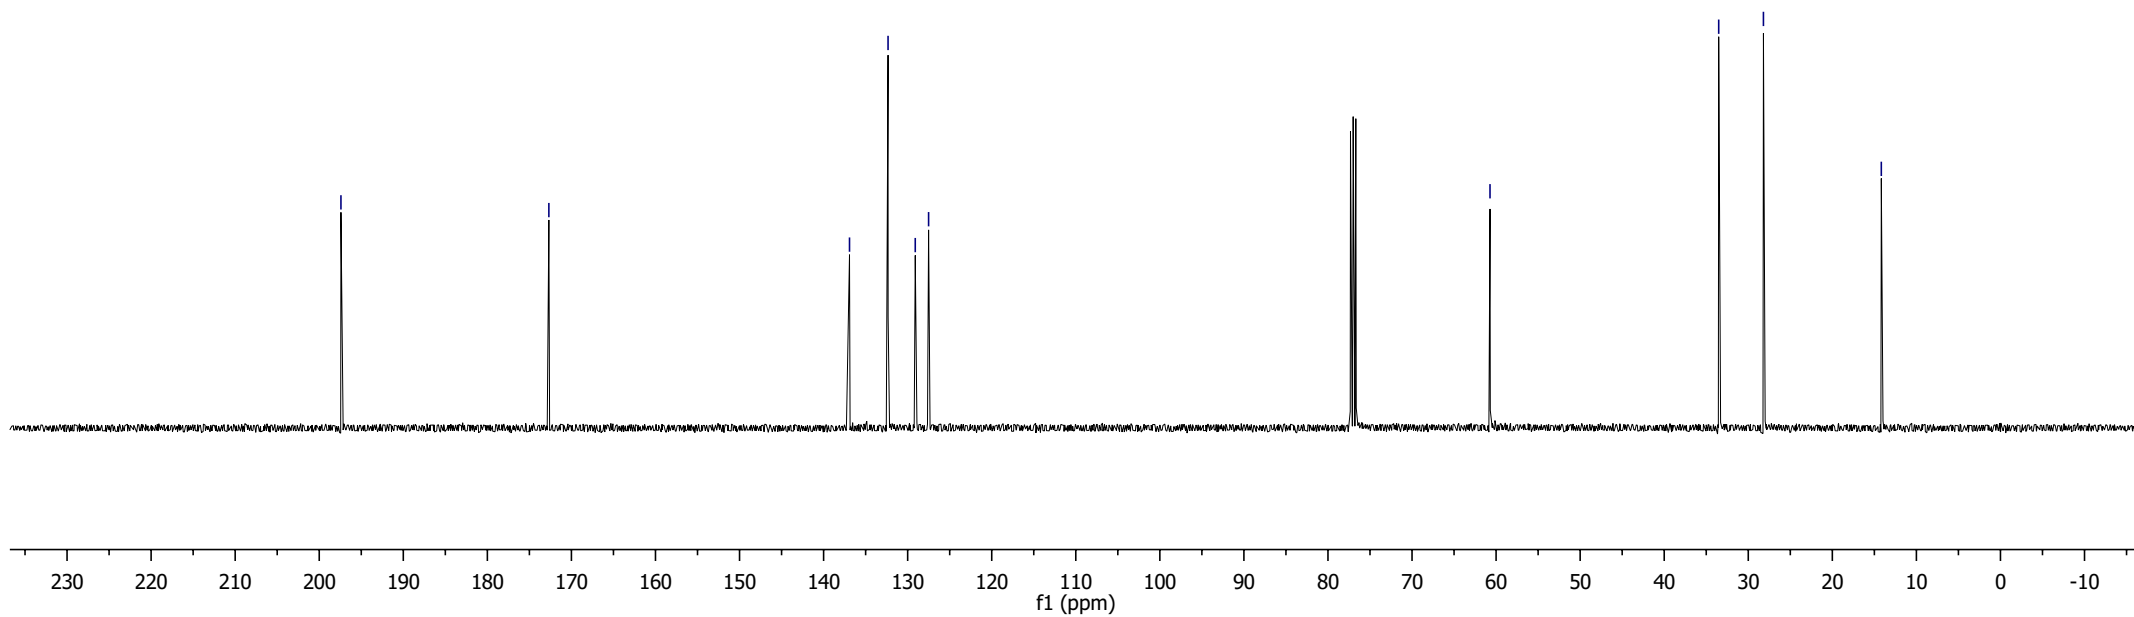

**Diethyl  $\delta,\delta'$ -dioxo-1,3-benzenedibutanoate (4a)**

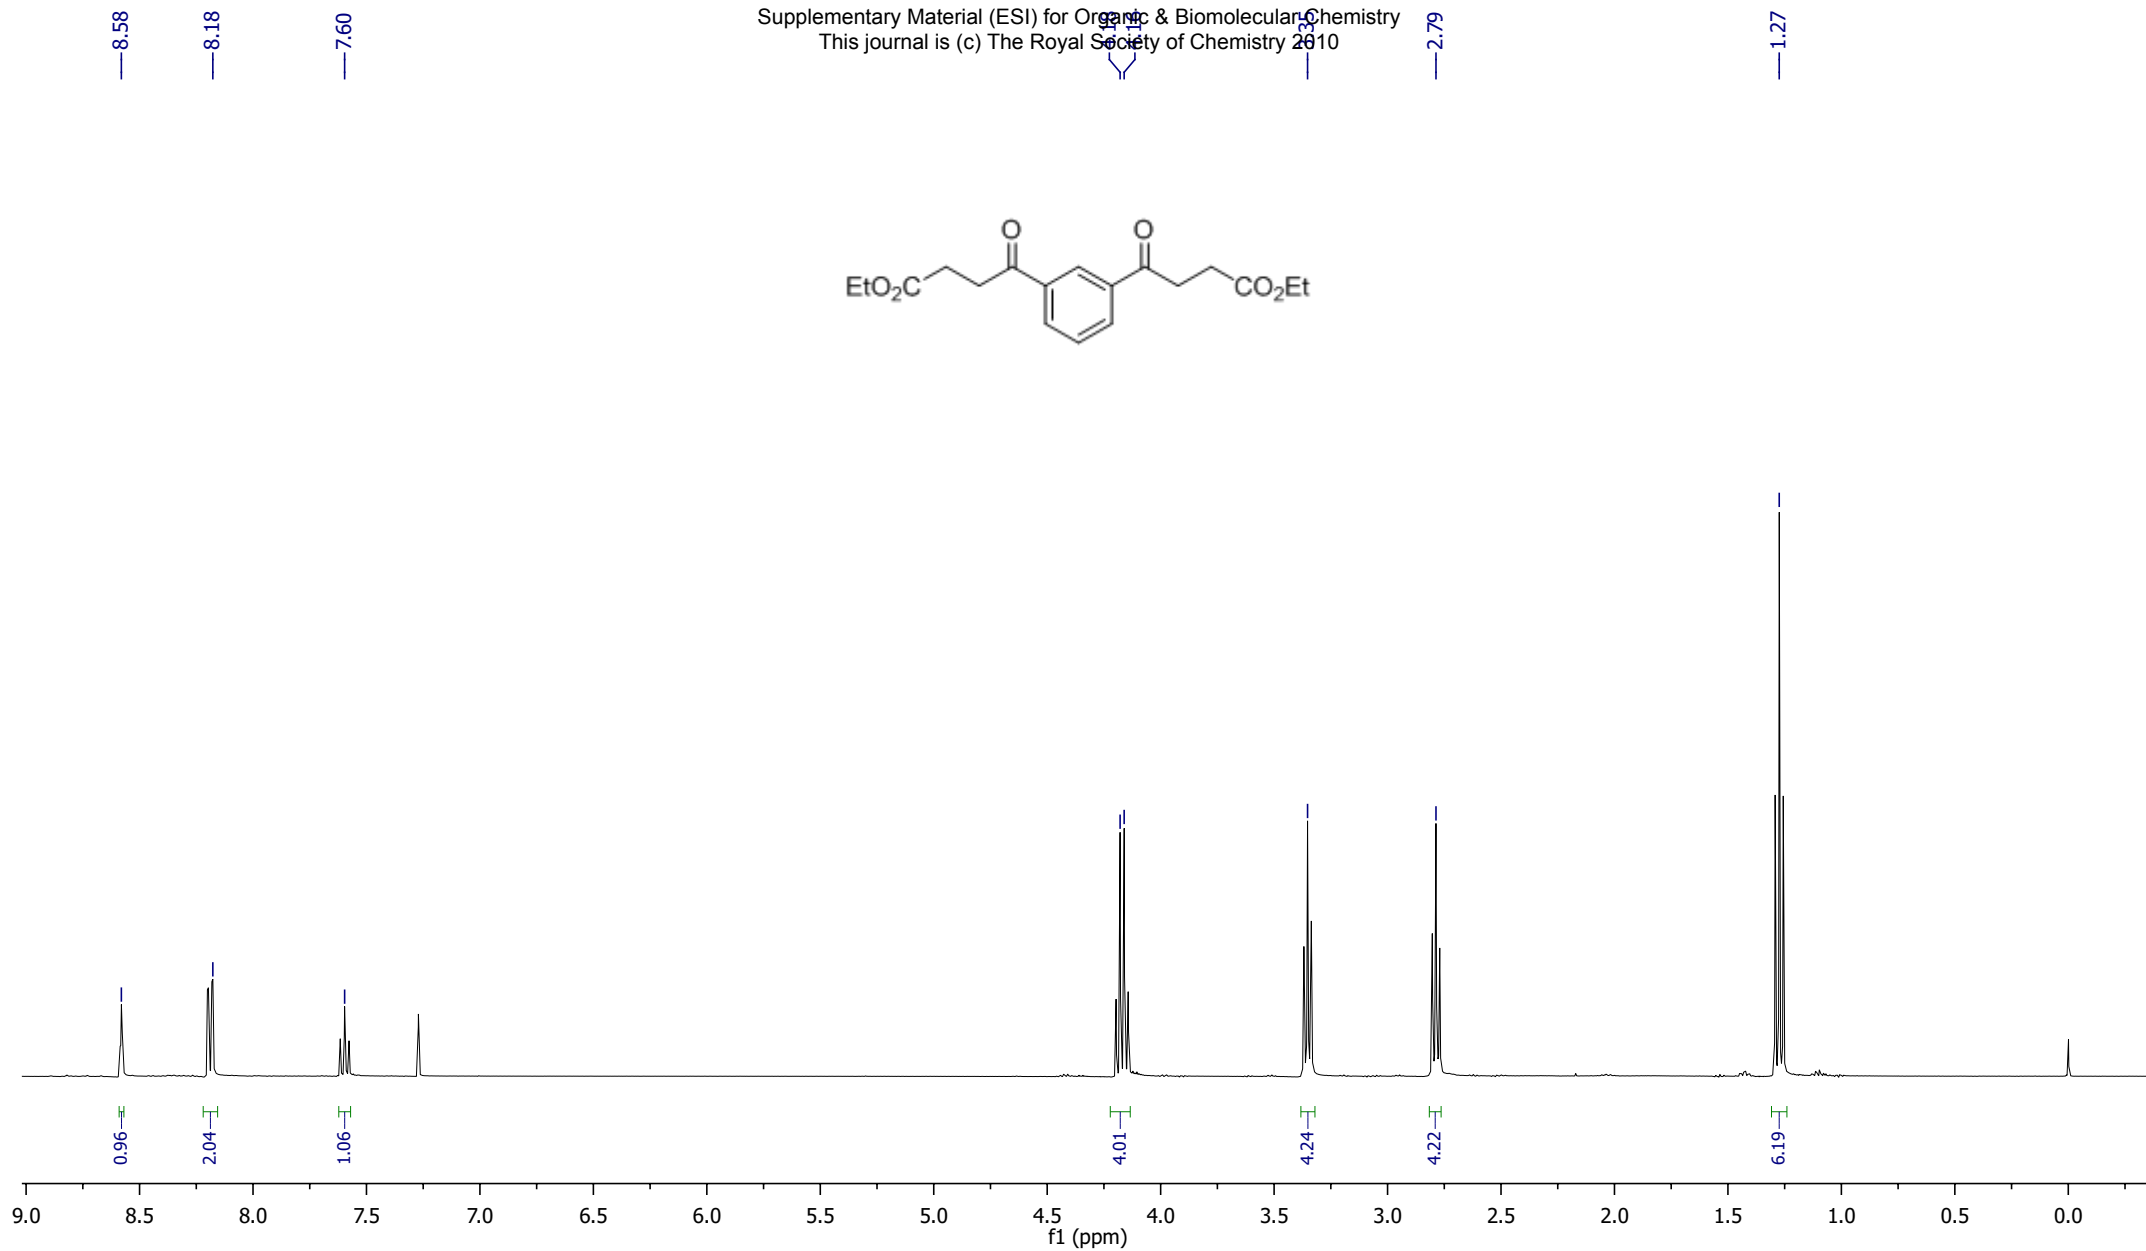

Diethyl  $\delta,\delta'$ -dioxo-1,3-benzenedibutanoate (4a)

198.94  
198.90

133.78  
133.61  
129.66  
127.55

52.74  
52.68

43.04

33.24

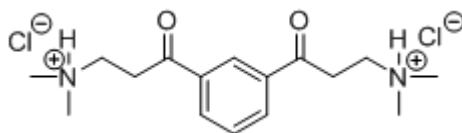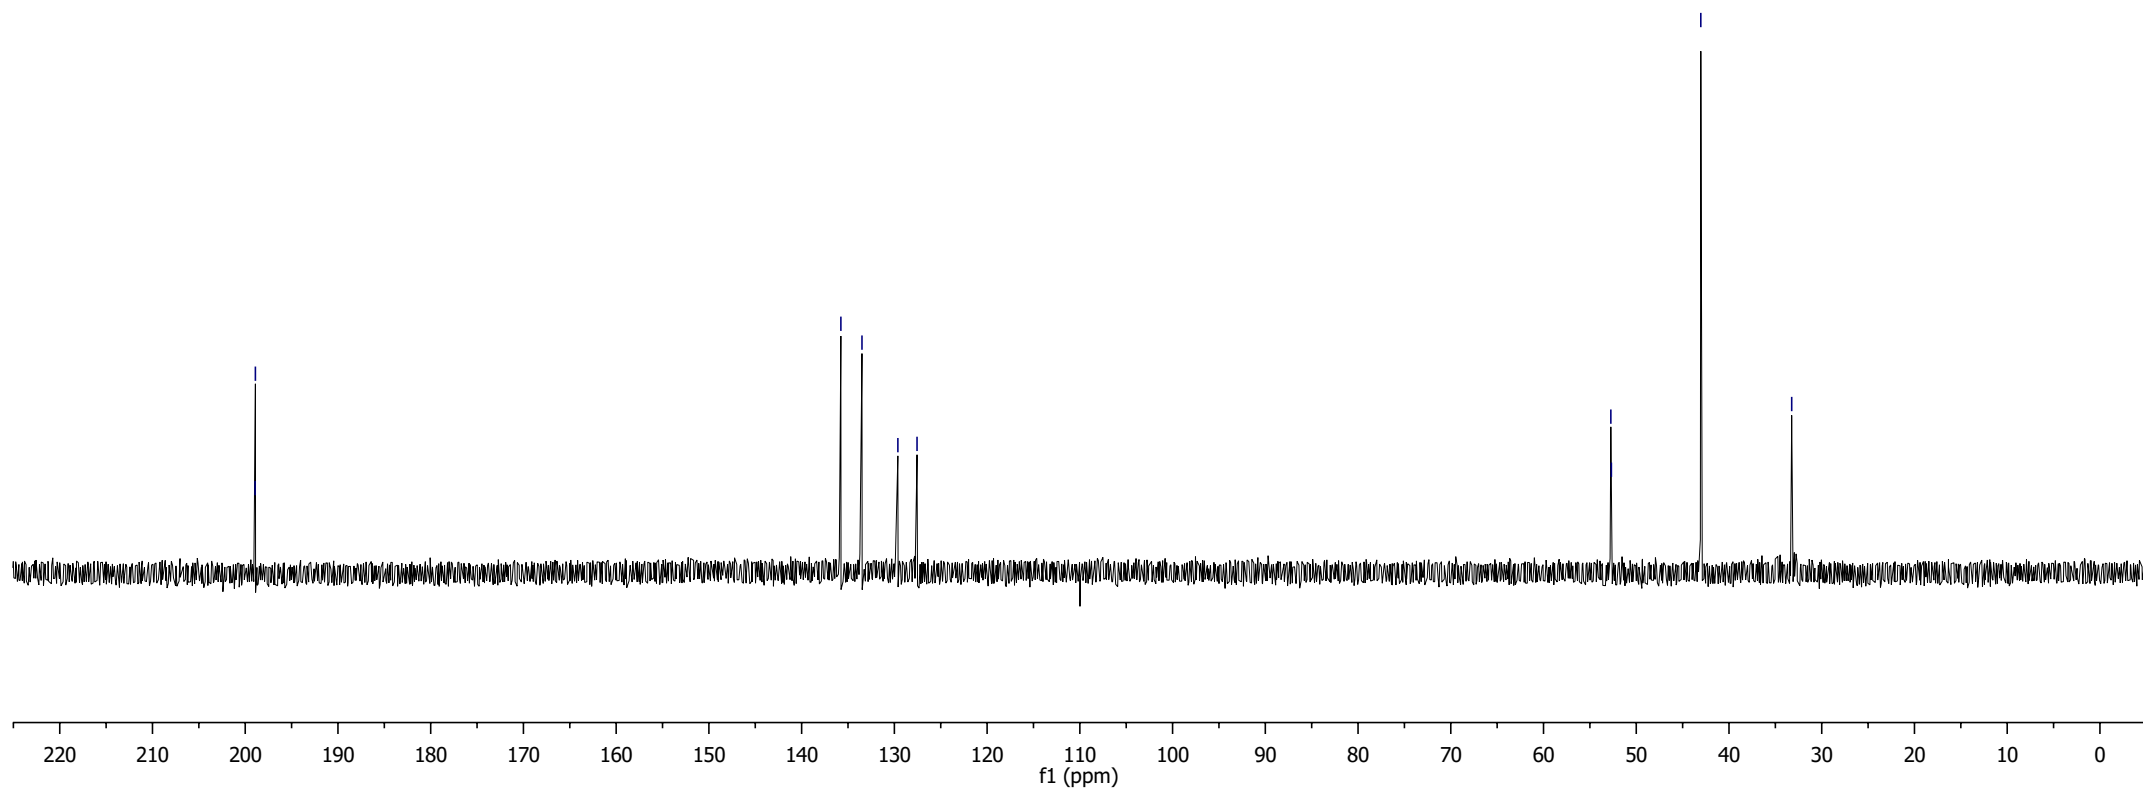

**1,3-Bis[1-oxo-3-(dimethylamino)propyl]benzene dihydrochloride (5)**

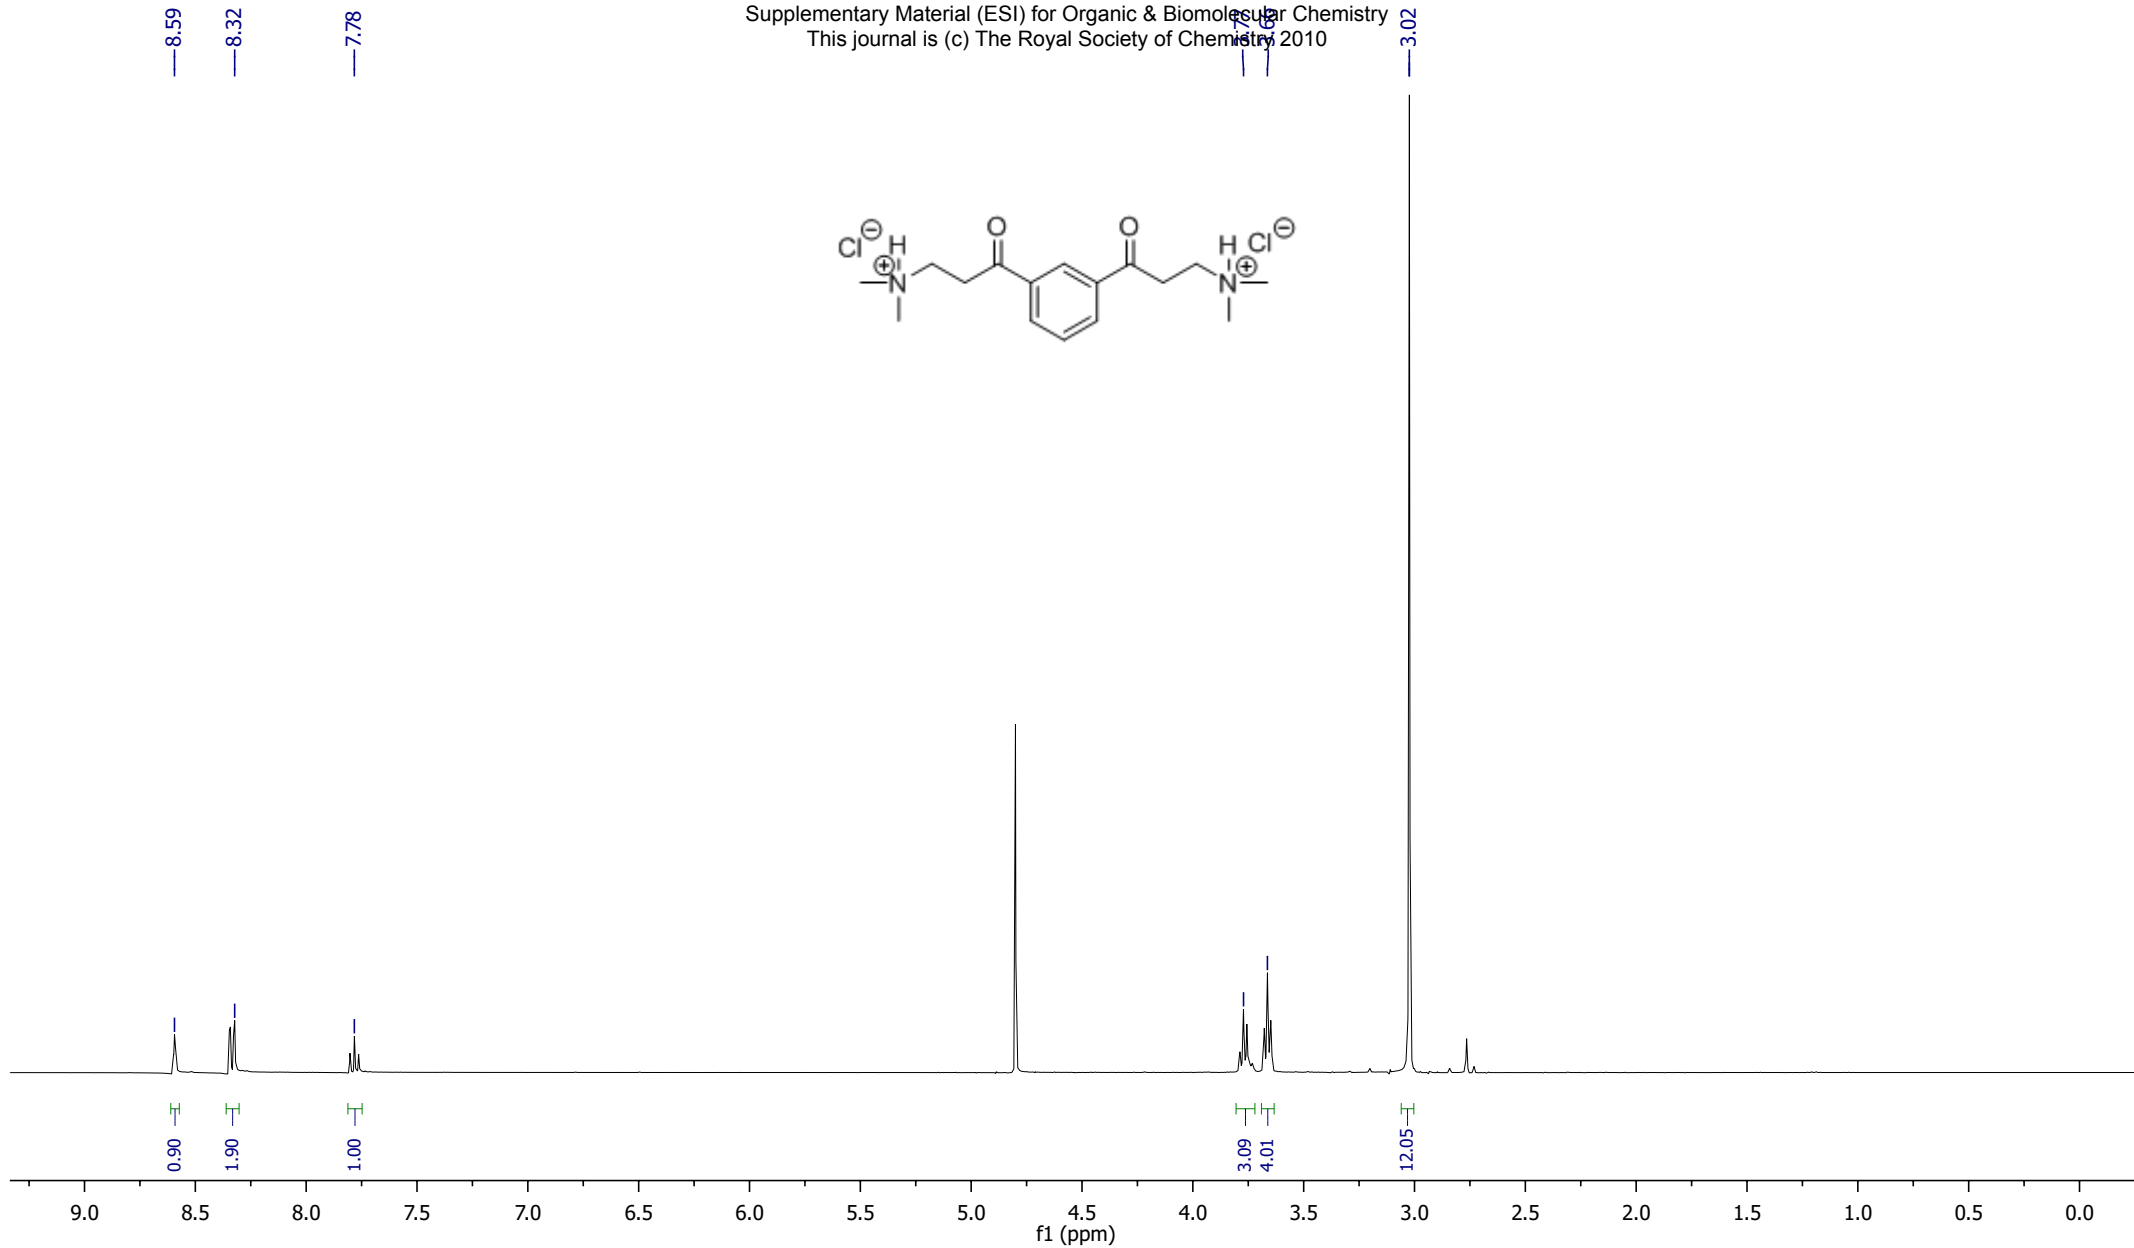

**1,3-Bis[1-oxo-3-(dimethylamino)propyl]benzene dihydrochloride (5)**



—194.45

~136.14

~132.84

~129.65

~127.46

—111.83

—34.48

—11.76

Supplementary Material (ESI) for Organic & Biomolecular Chemistry  
This journal is (c) The Royal Society of Chemistry 2010

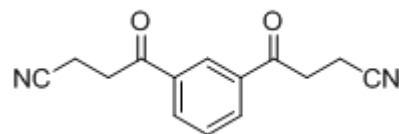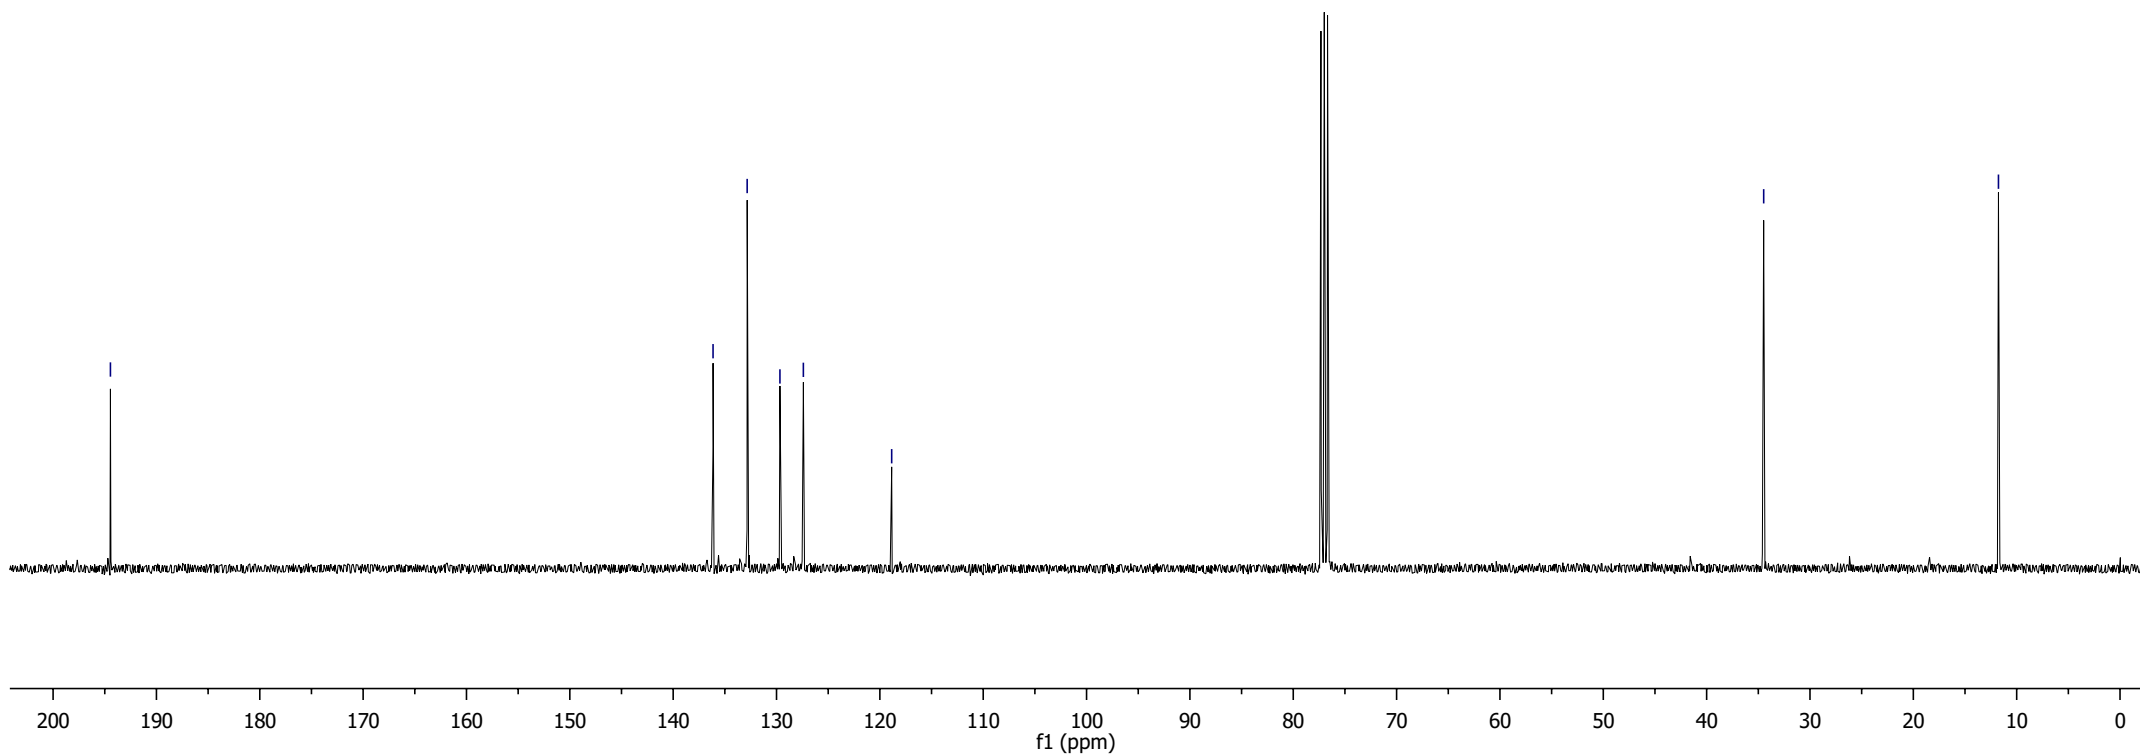

**$\gamma,\gamma'$ -Dioxo-1,3-benzenedibutanenitrile (6)**

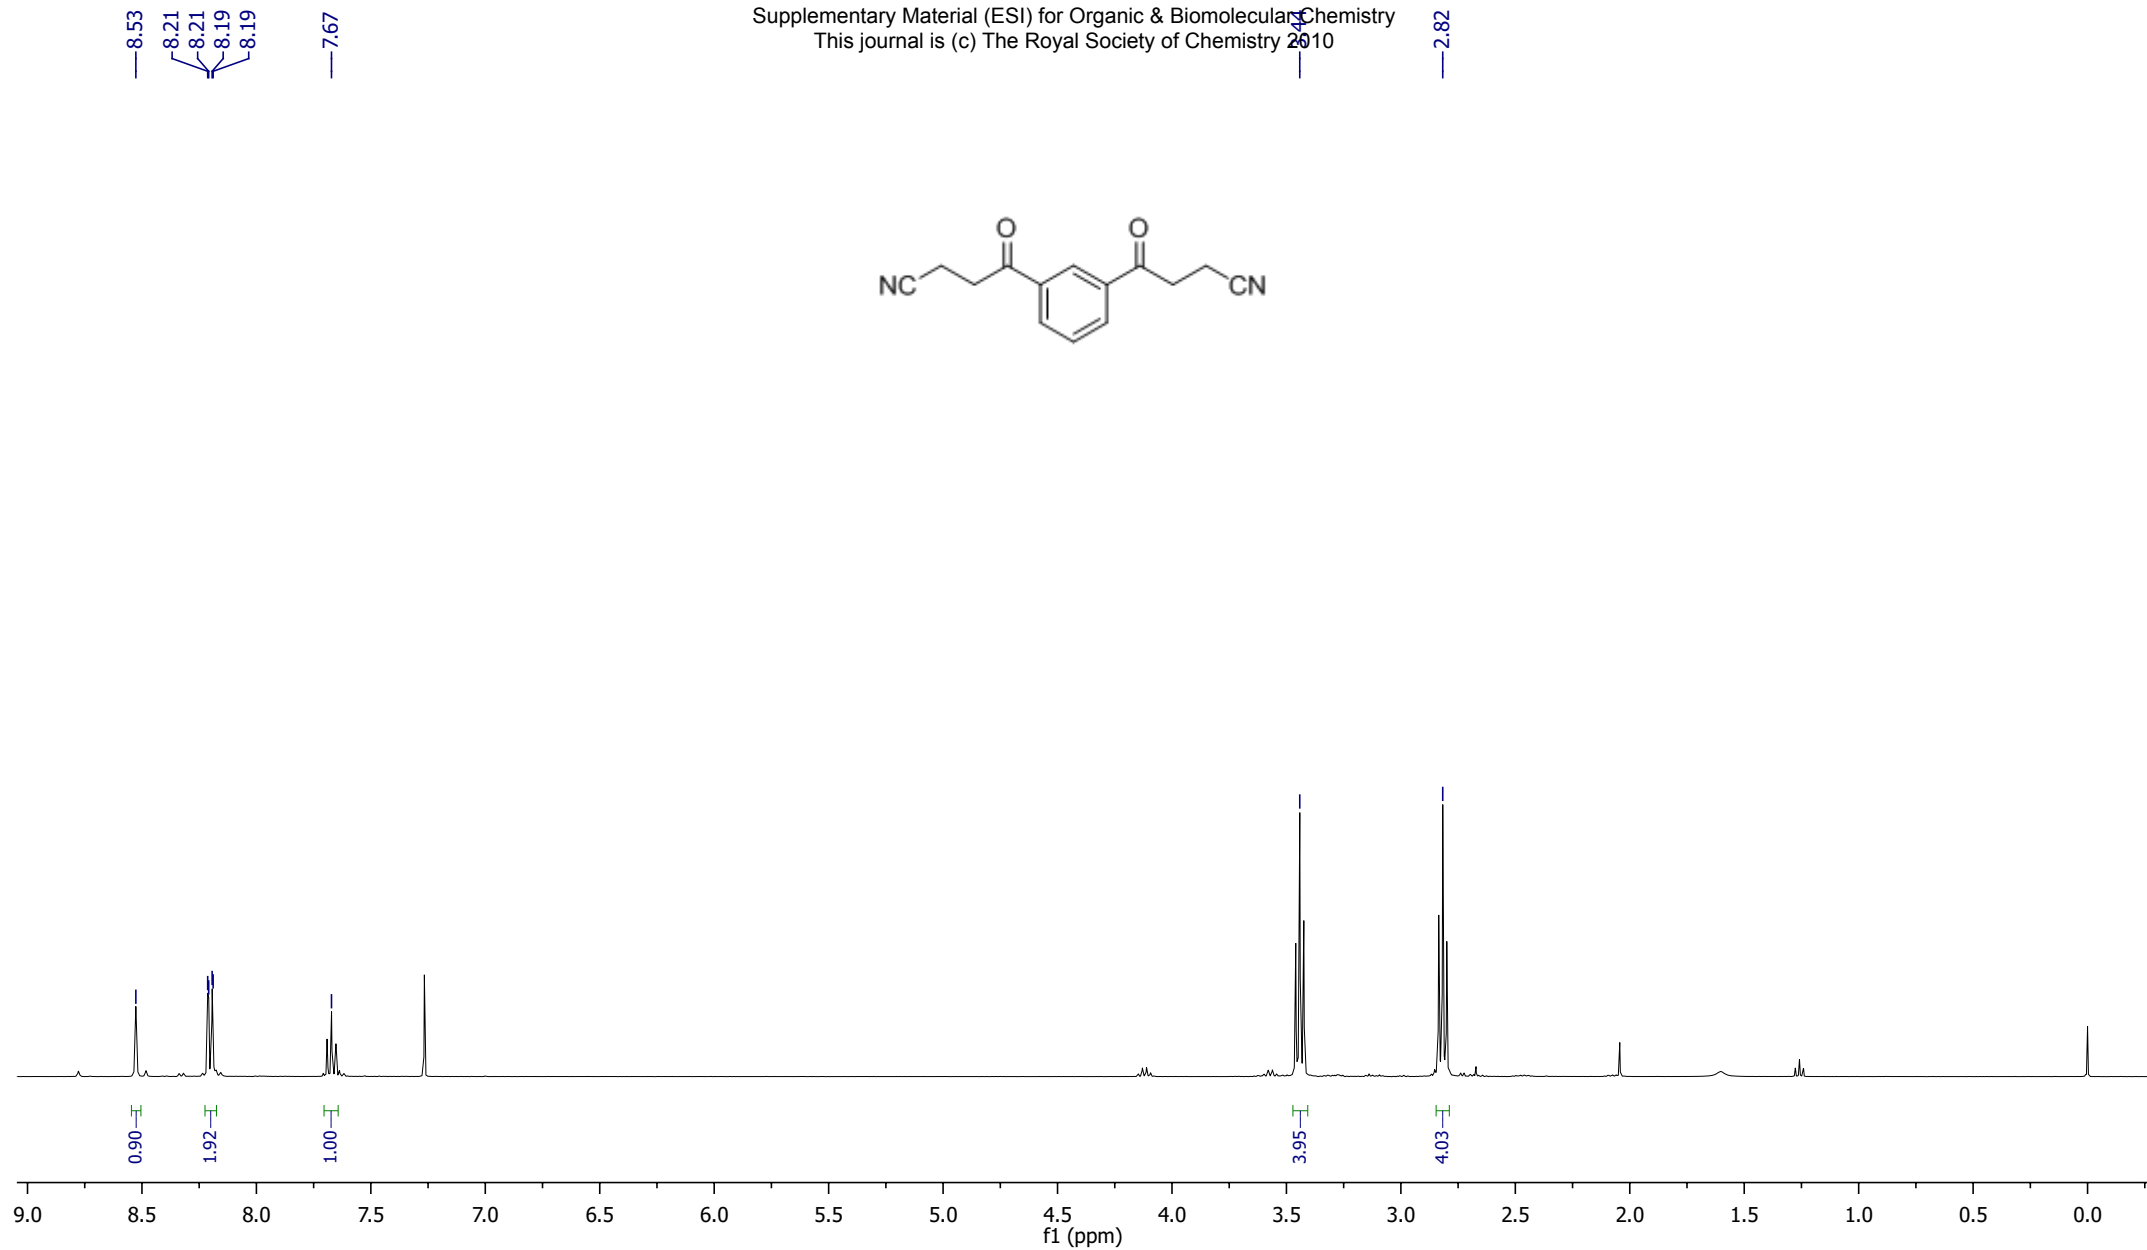

$\gamma,\gamma'$ -Dioxo-1,3-benzenedibutanenitrile (6)

—198.16

—173.76

—136.72

—132.96

—128.90

—128.88

—33.34

—27.87

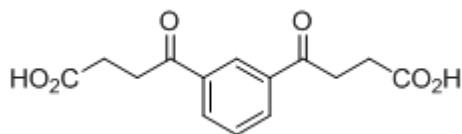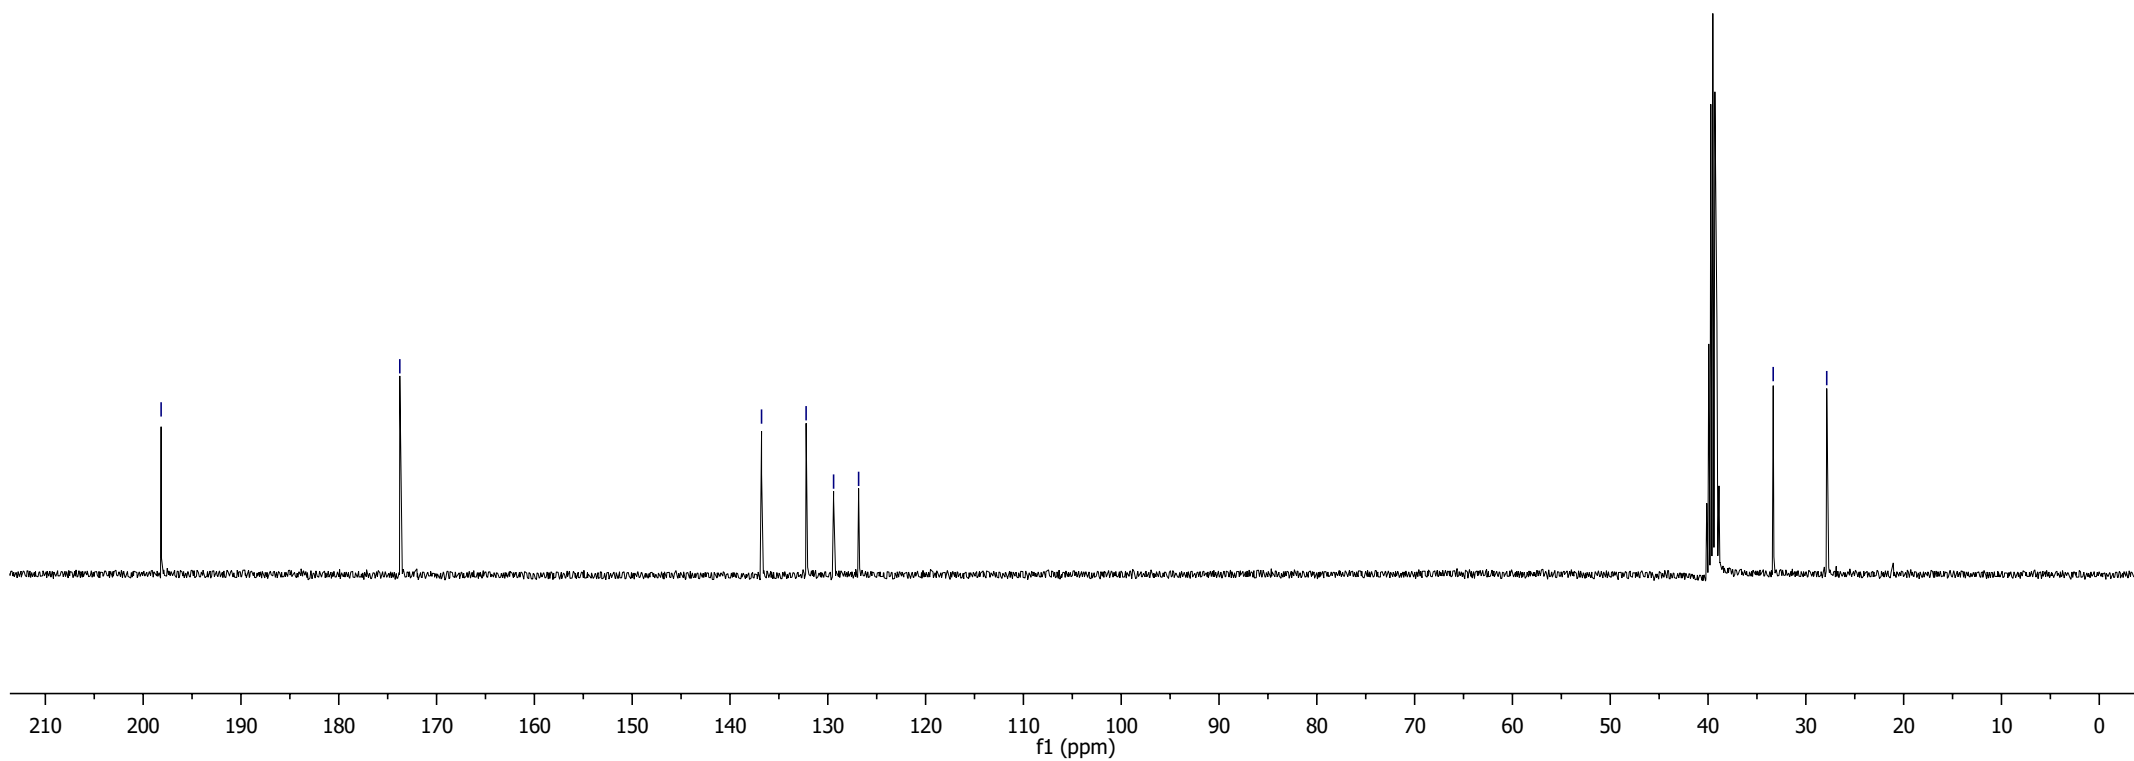

**$\gamma,\gamma'$ -Dioxo-1,3-benzenedibutanoic acid (4b)**

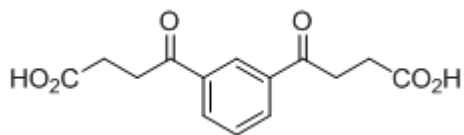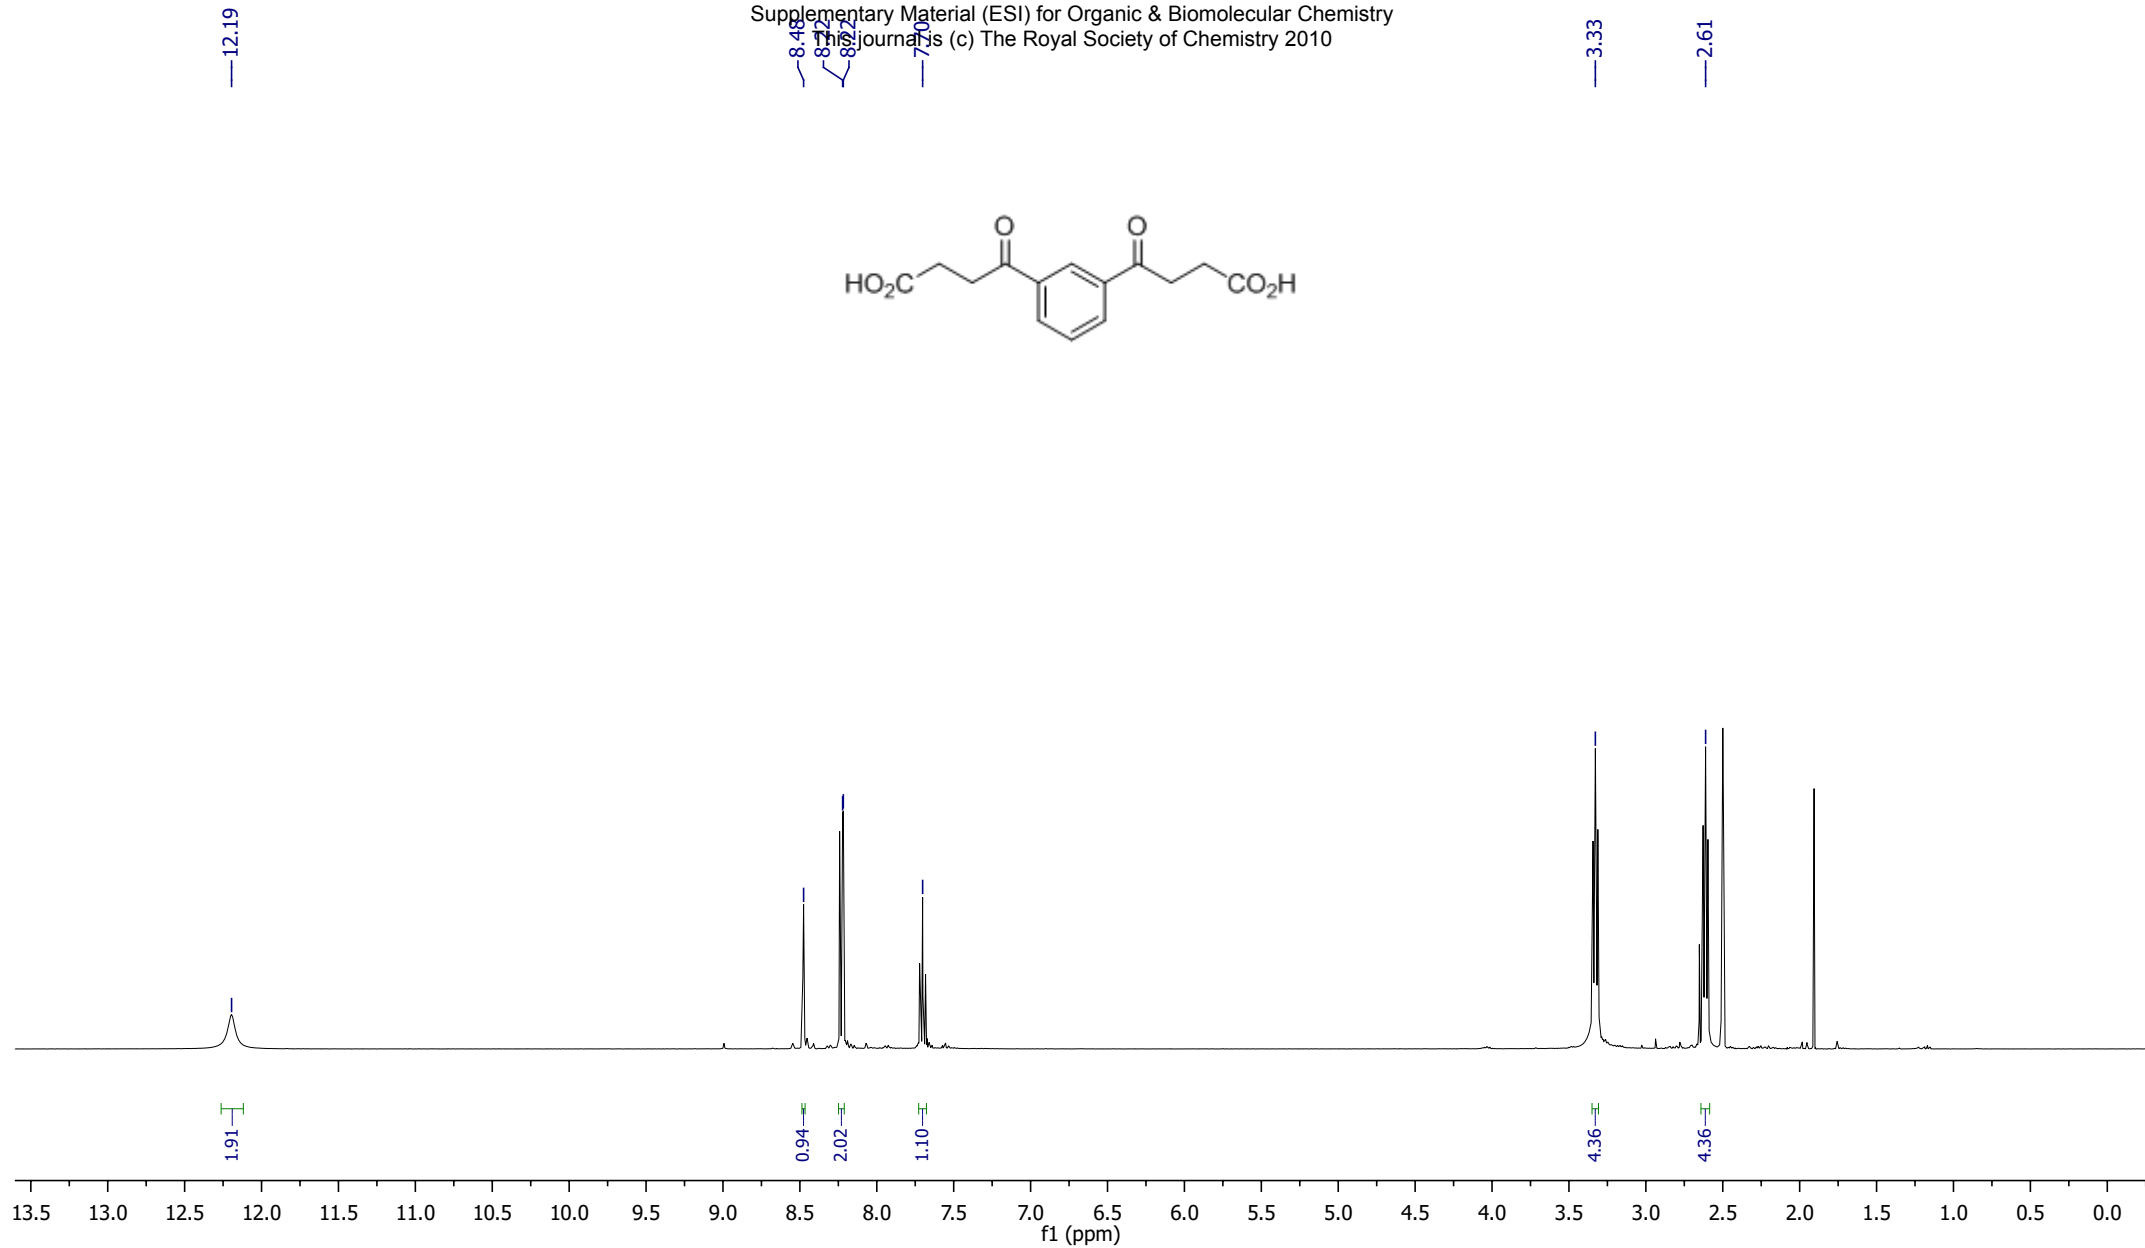

**$\gamma,\gamma'$ -Dioxo-1,3-benzenedibutanoic acid (4b)**

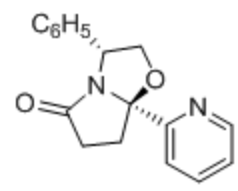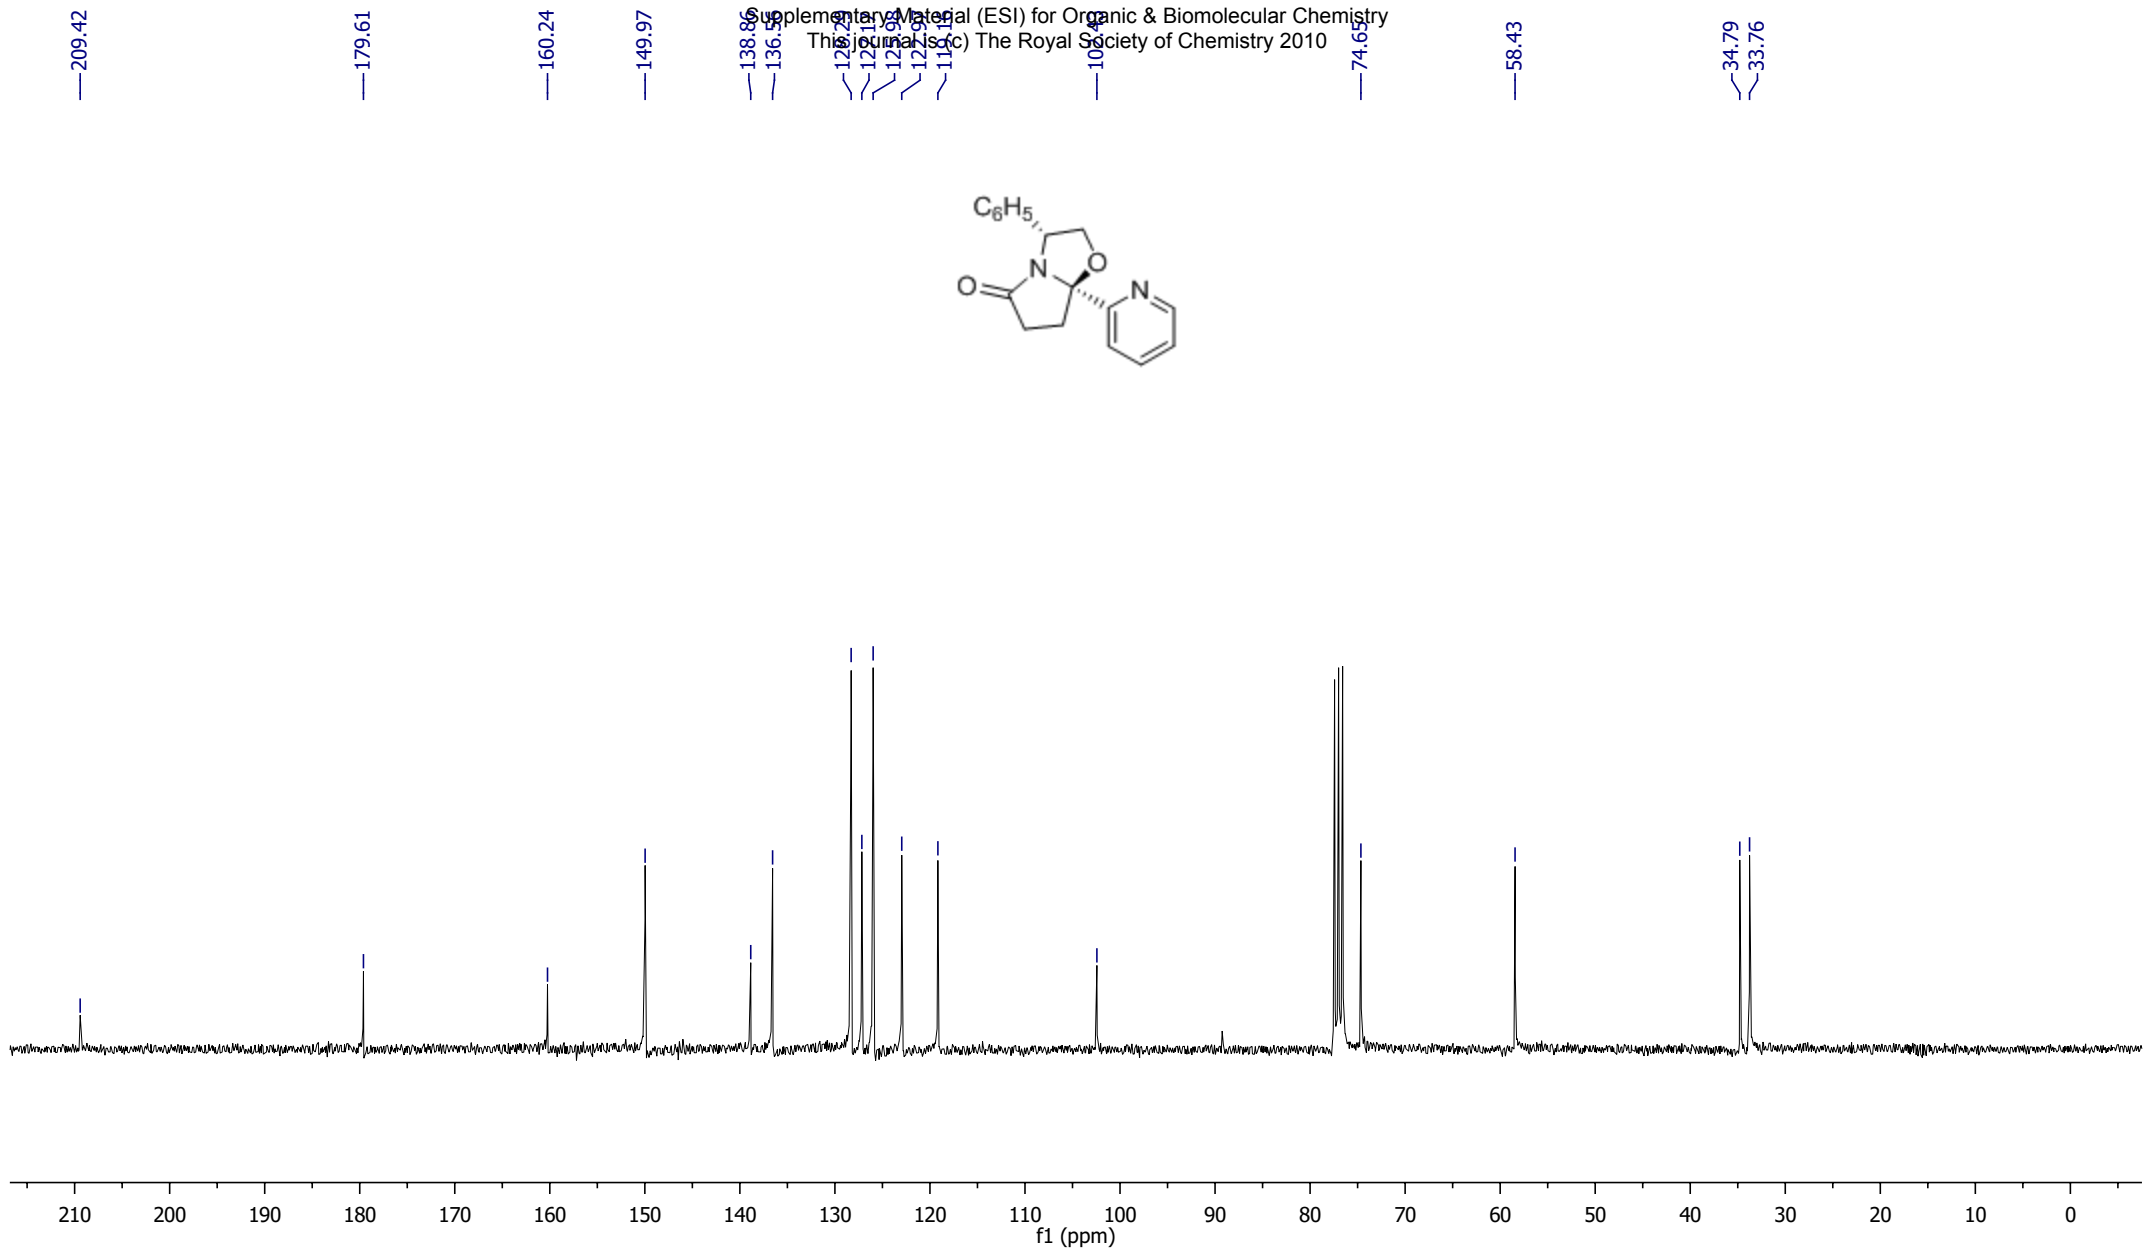

**(3*R*,7*aR*)-5-Oxo-3-phenyl-7*a*-(2-pyridyl)-2,3,5,7,7*a*-hexahydropyrrolo[2,1-*b*]oxazole (7)**

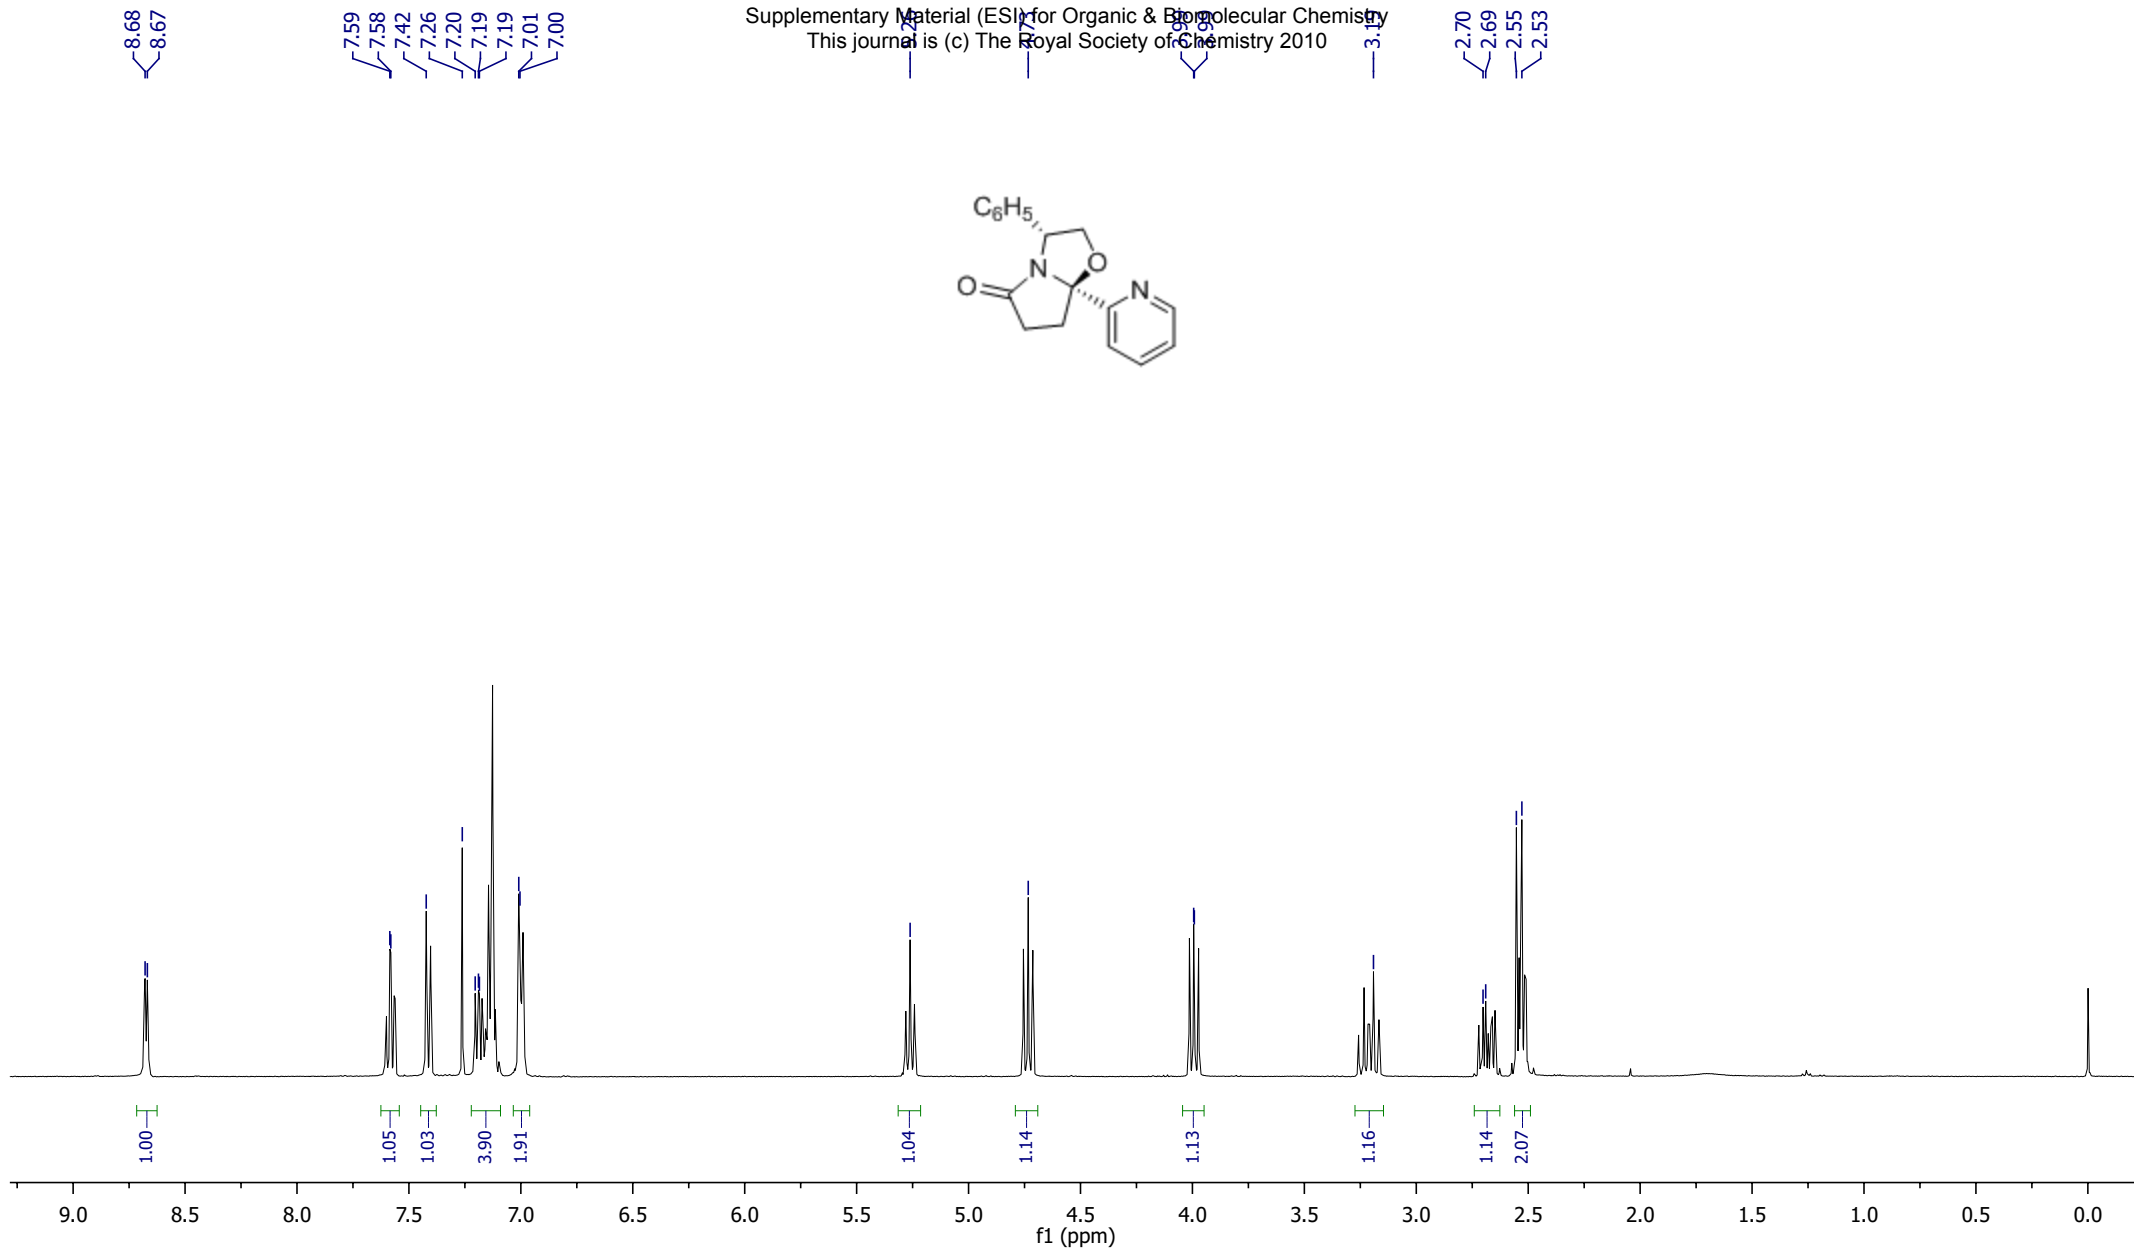

**(3R,7aR)-5-Oxo-3-phenyl-7a-(2-pyridyl)-2,3,5,7,7a-hexahydropyrrolo[2,1-b]oxazole (7)**

—178.59

—161.19

—139.10  
—137.80

—128.25  
—127.25  
—125.66

Supplementary Material (ESI) for Organic & Biomolecular Chemistry  
This journal is (c) The Royal Society of Chemistry 2016

—115.95

—106.19

—75.86

—57.73

—35.32  
—34.17

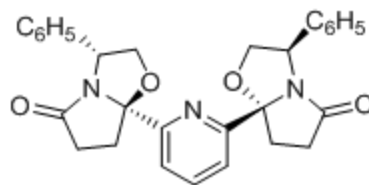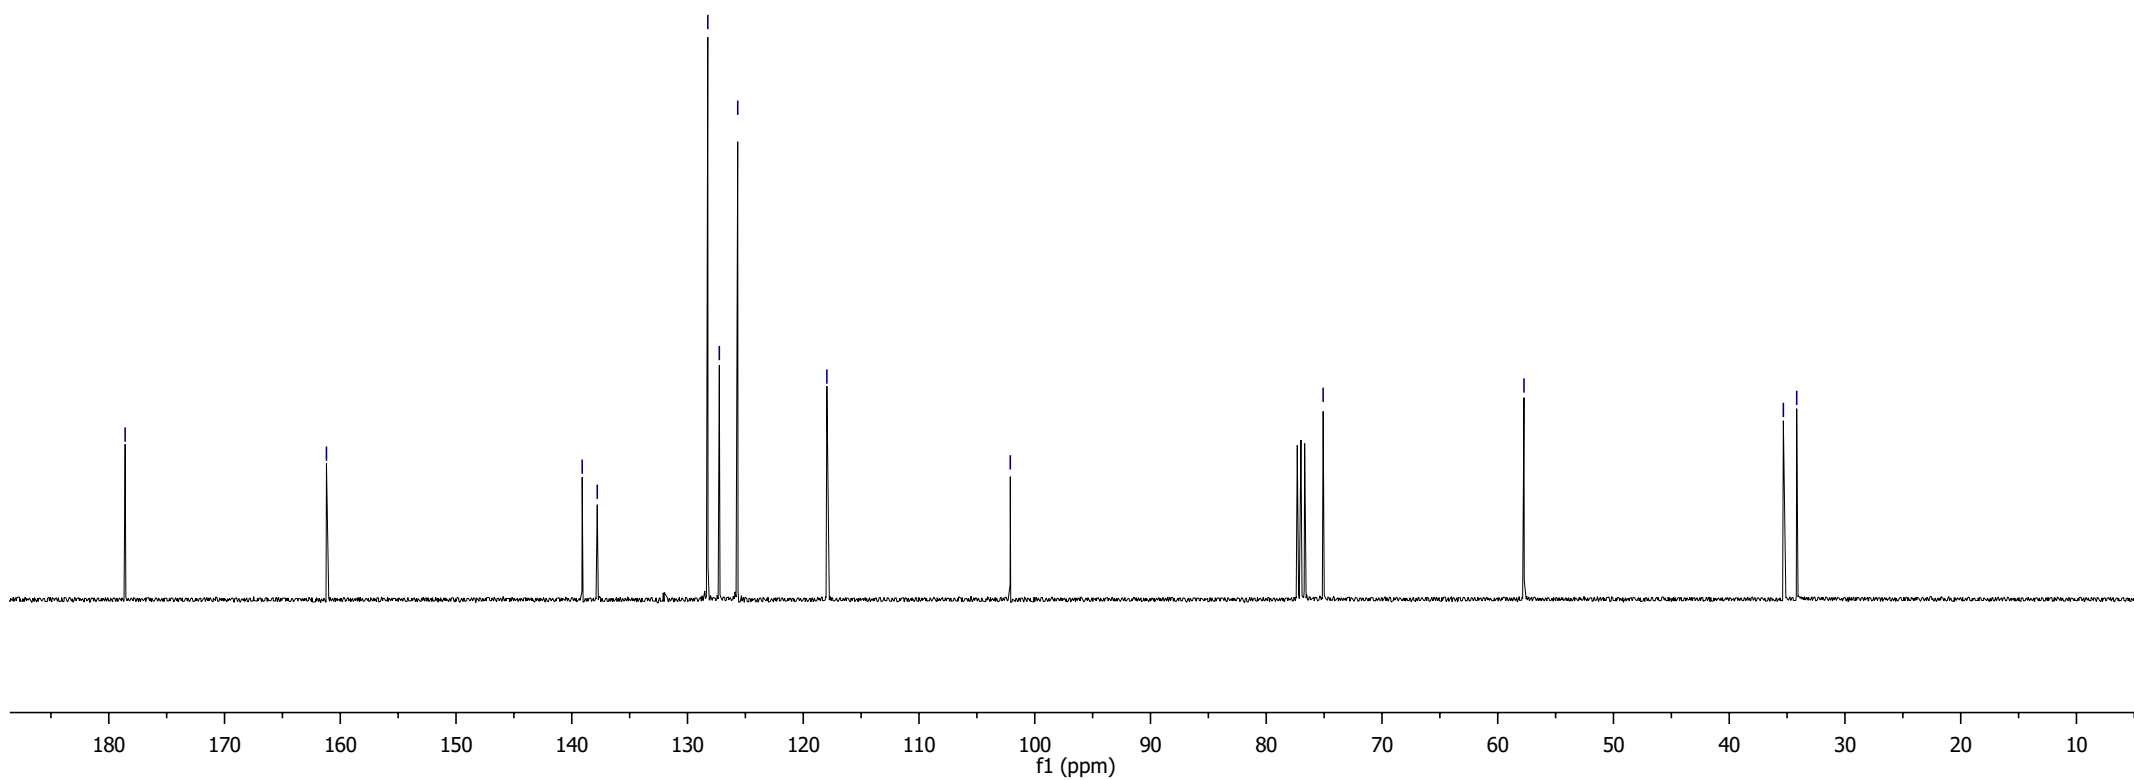

**(3R,3'R,7aR,7a'R)-2,6-Bis(5-oxo-3-phenyl-2,3,5,6,7,7a-hexahydropyrrolo[2,1-b]oxazol-7a-yl)pyridine (9)**

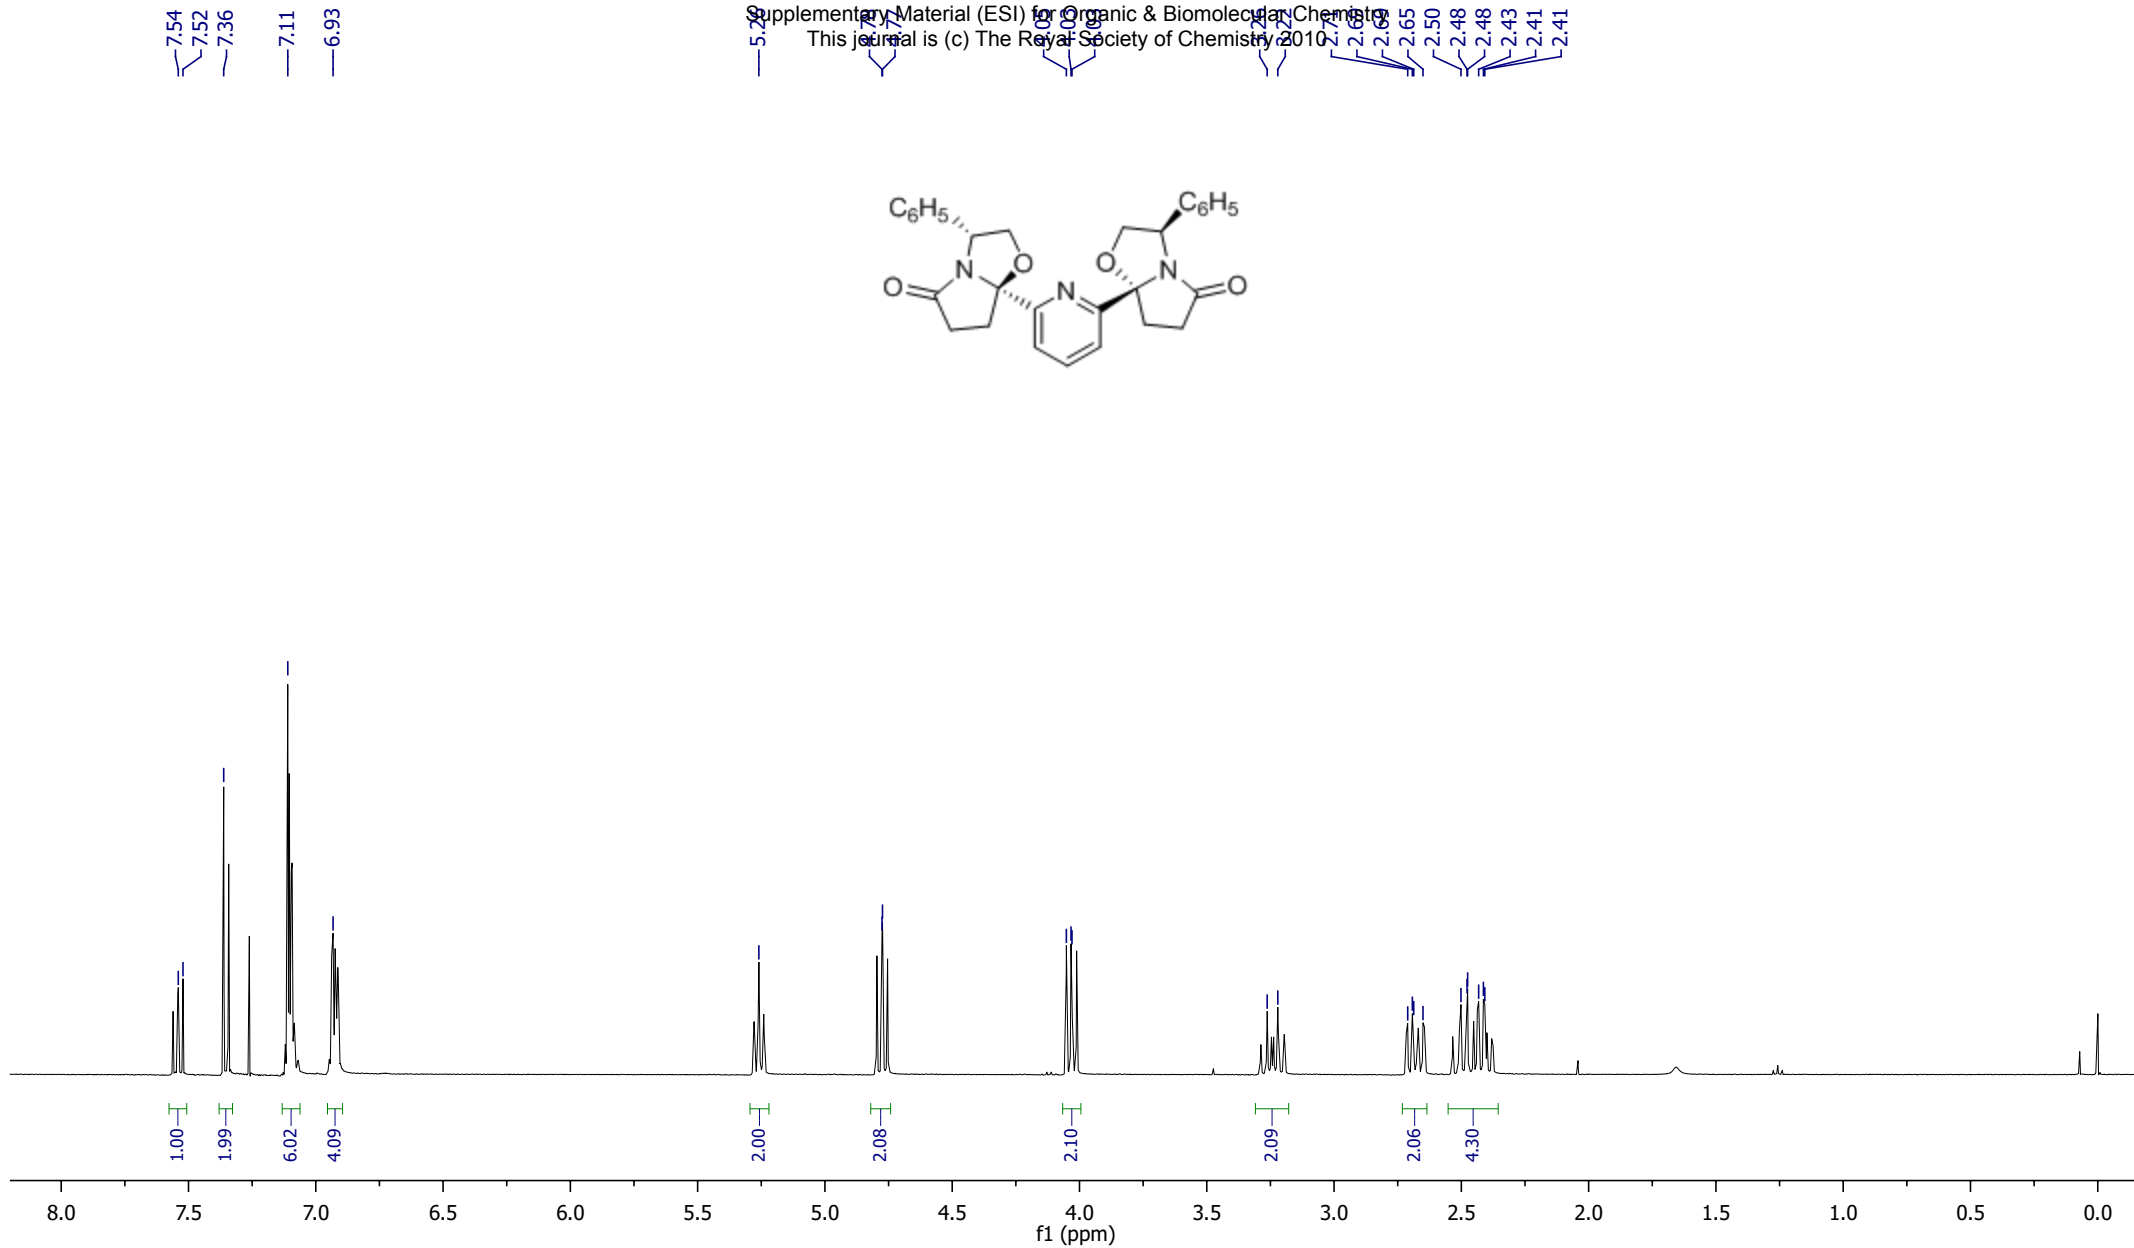

**(3*R*,3'*R*,7*aR*,7*a'R*)-2,6-bis(5-oxo-3-phenyl-2,3,5,6,7,7*a*-hexahydropyrrolo[2,1-*b*]oxazol-7*a*-yl)pyridine (9)**



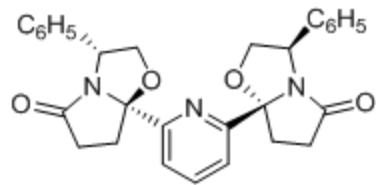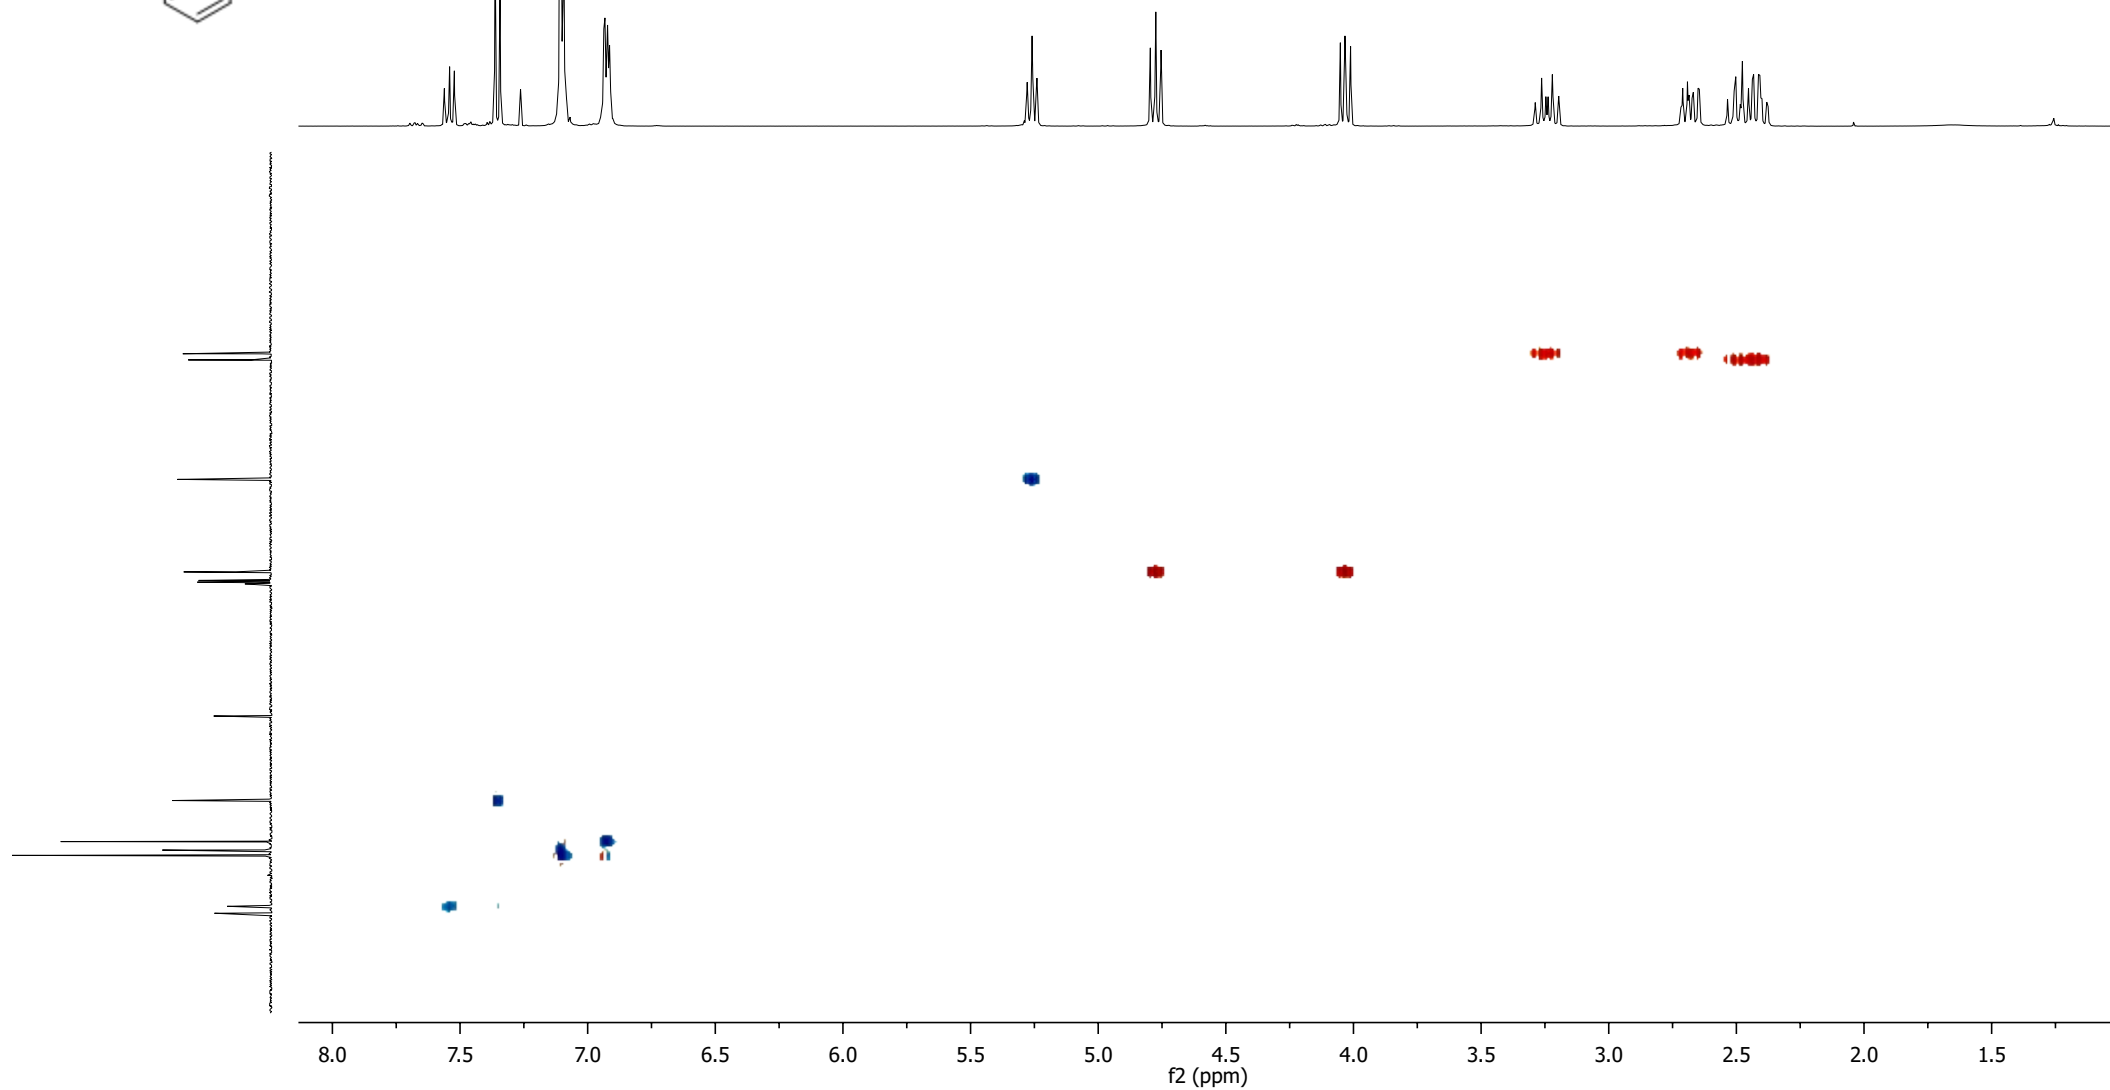

**(3*R*,3'*R*,7*aR*,7*a'R*)-2,6-Bis(5-oxo-3-phenyl-2,3,5,6,7,7*a*-hexahydropyrrolo[2,1-*b*]oxazol-7*a*-yl)pyridine (9)**

—170.48

—160.36

—138.47  
—137.99

—128.03  
—127.50  
—127.31

—119.26

Supplementary Material (ESI) for Organic & Biomolecular Chemistry  
This journal is © The Royal Society of Chemistry 2010

—95.51

—69.75

—59.55

—35.23

—30.76

—15.26

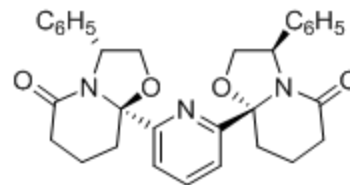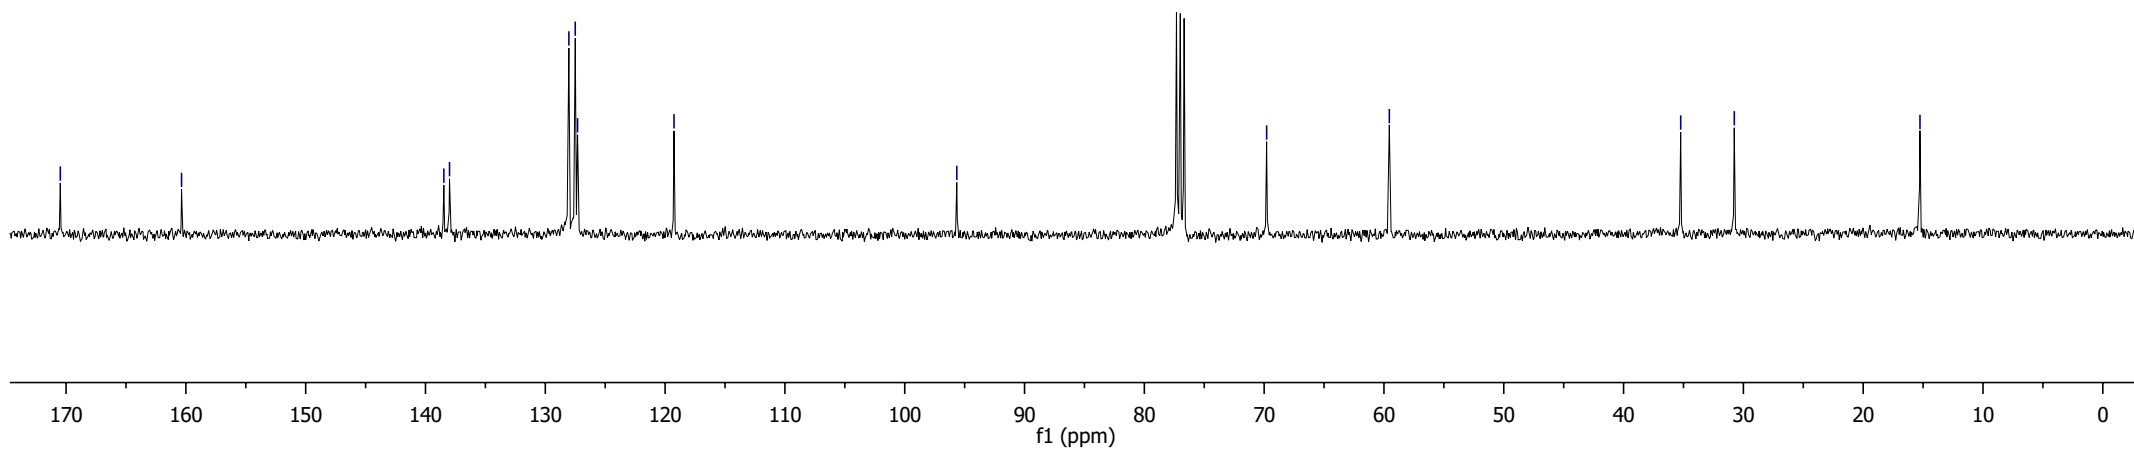

**(3R,3'R,8aR,8a'R)-2,6-Bis(5-oxo-3-phenyl-2,3,6,7,8,8a-hexahydro-5H-oxazolo[3,2-a]pyrid-8a-yl)pyridine (10)**

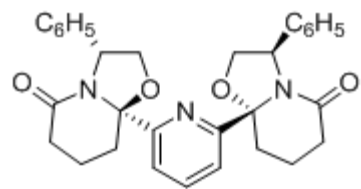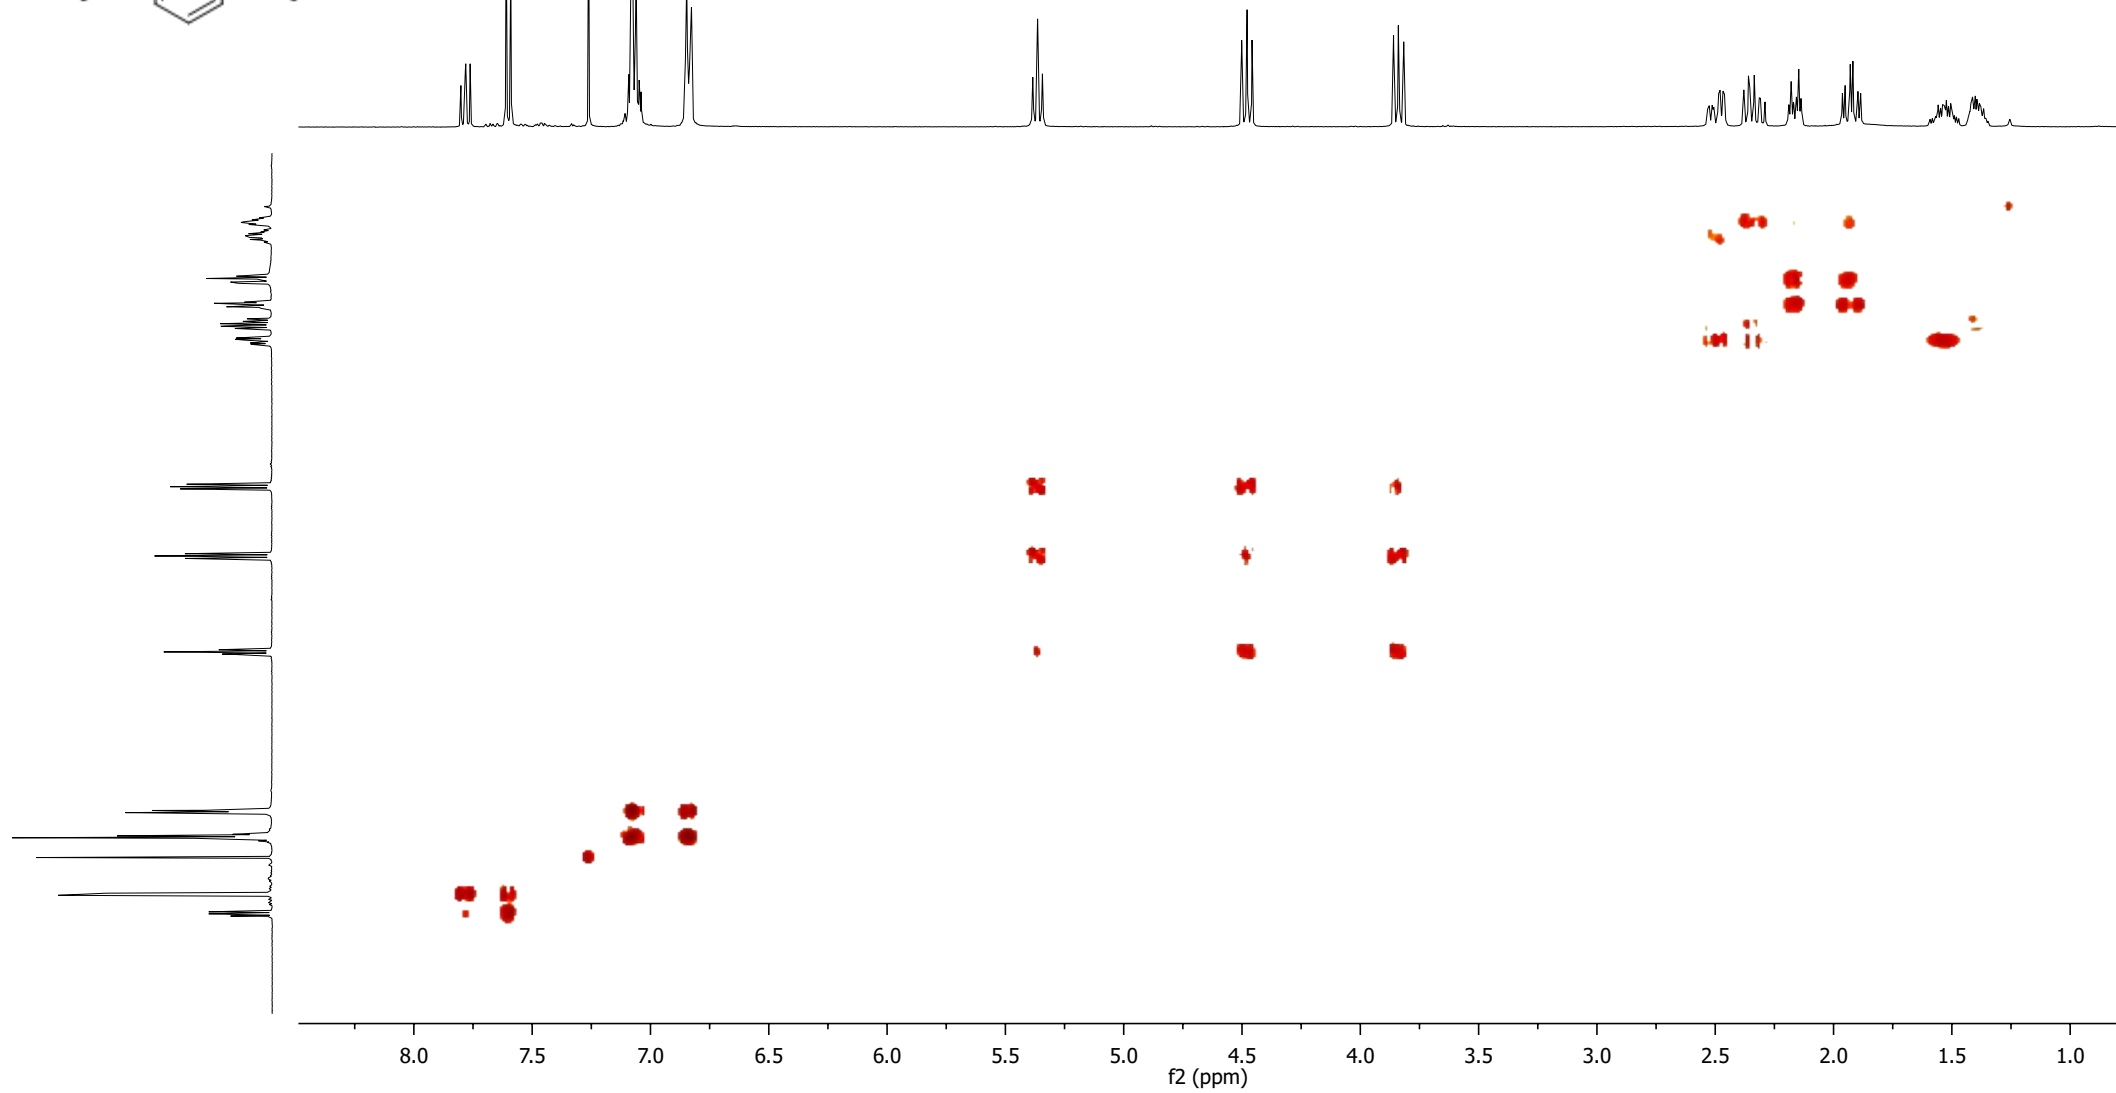

**(3*R*,3'*R*,8*aR*,8*a'**R*)-2,6-Bis(5-oxo-3-phenyl-2,3,6,7,8,8*a*-hexahydro-5*H*-oxazolo[3,2-*a*]pyrid-8*a*-yl)pyridine (10)**

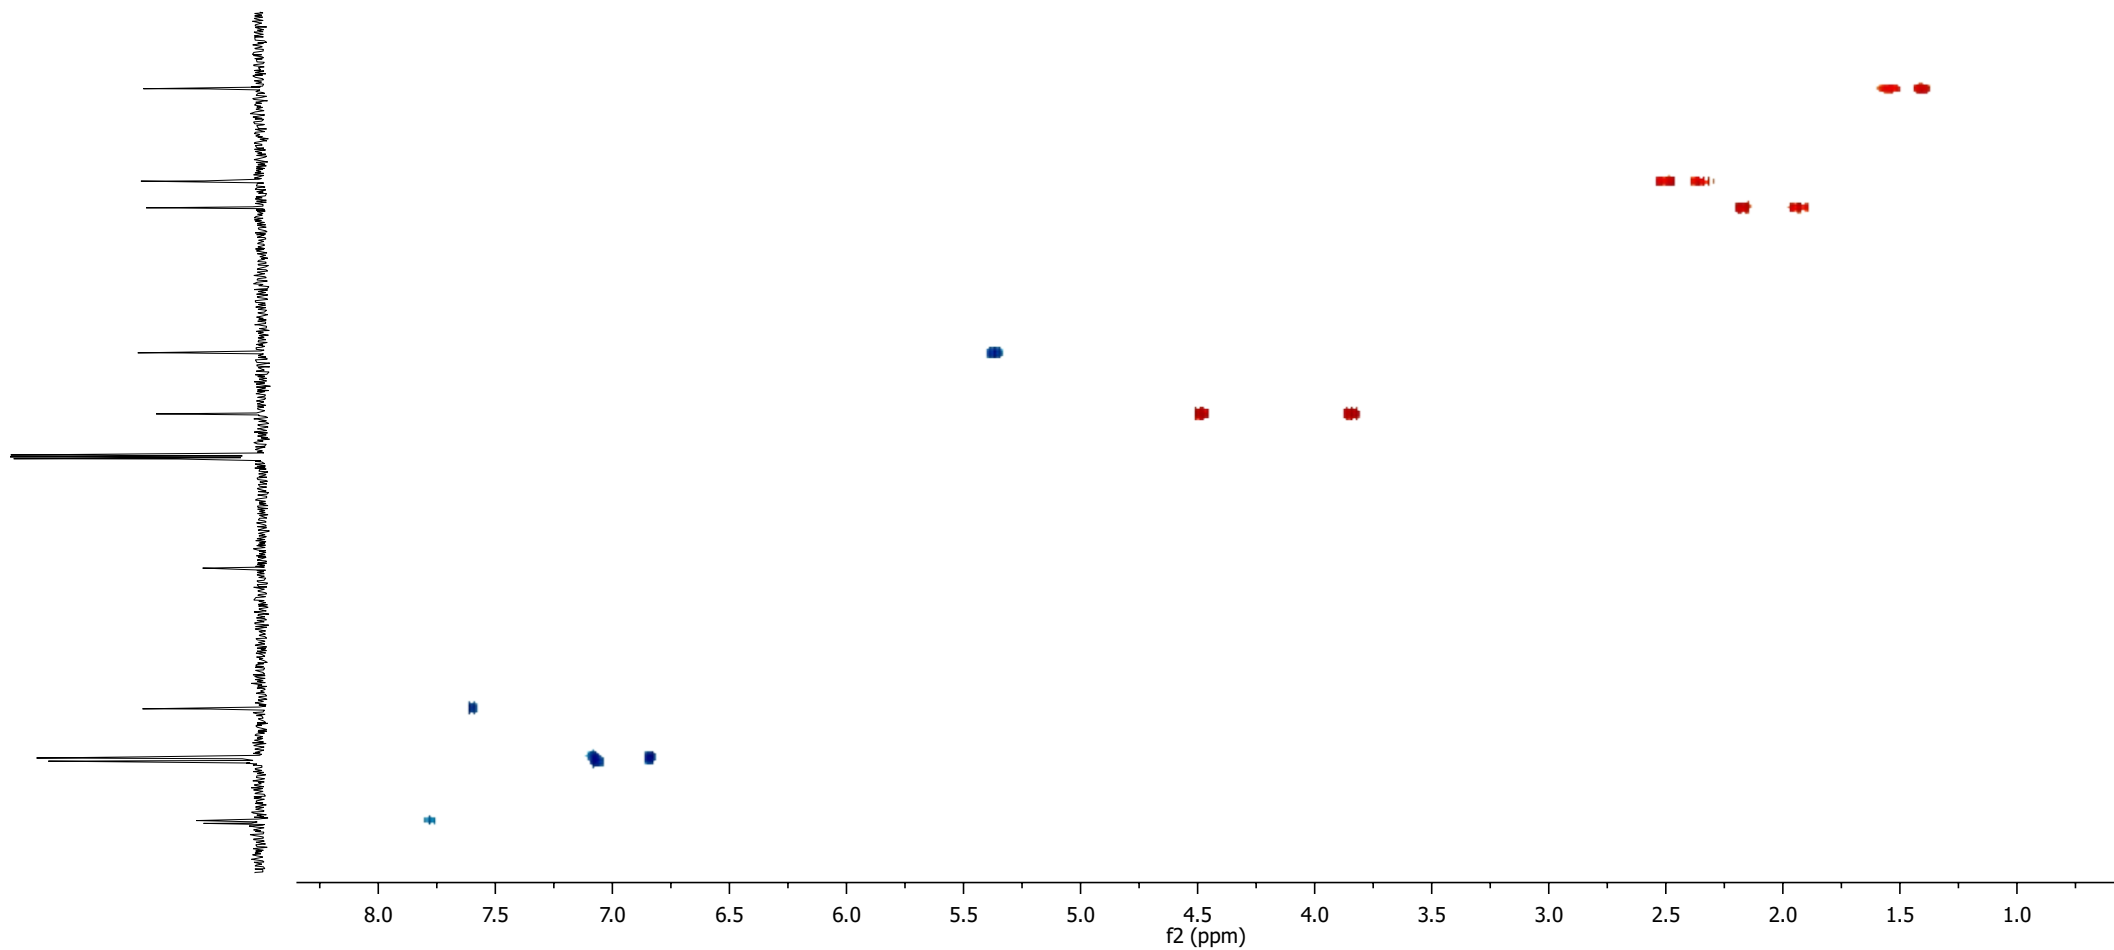

**(3R,3'R,8aR,8a'R)-2,6-Bis(5-oxo-3-phenyl-2,3,6,7,8,8a-hexahydro-5H-oxazolo[3,2-a]pyrid-8a-yl)pyridine (10)**

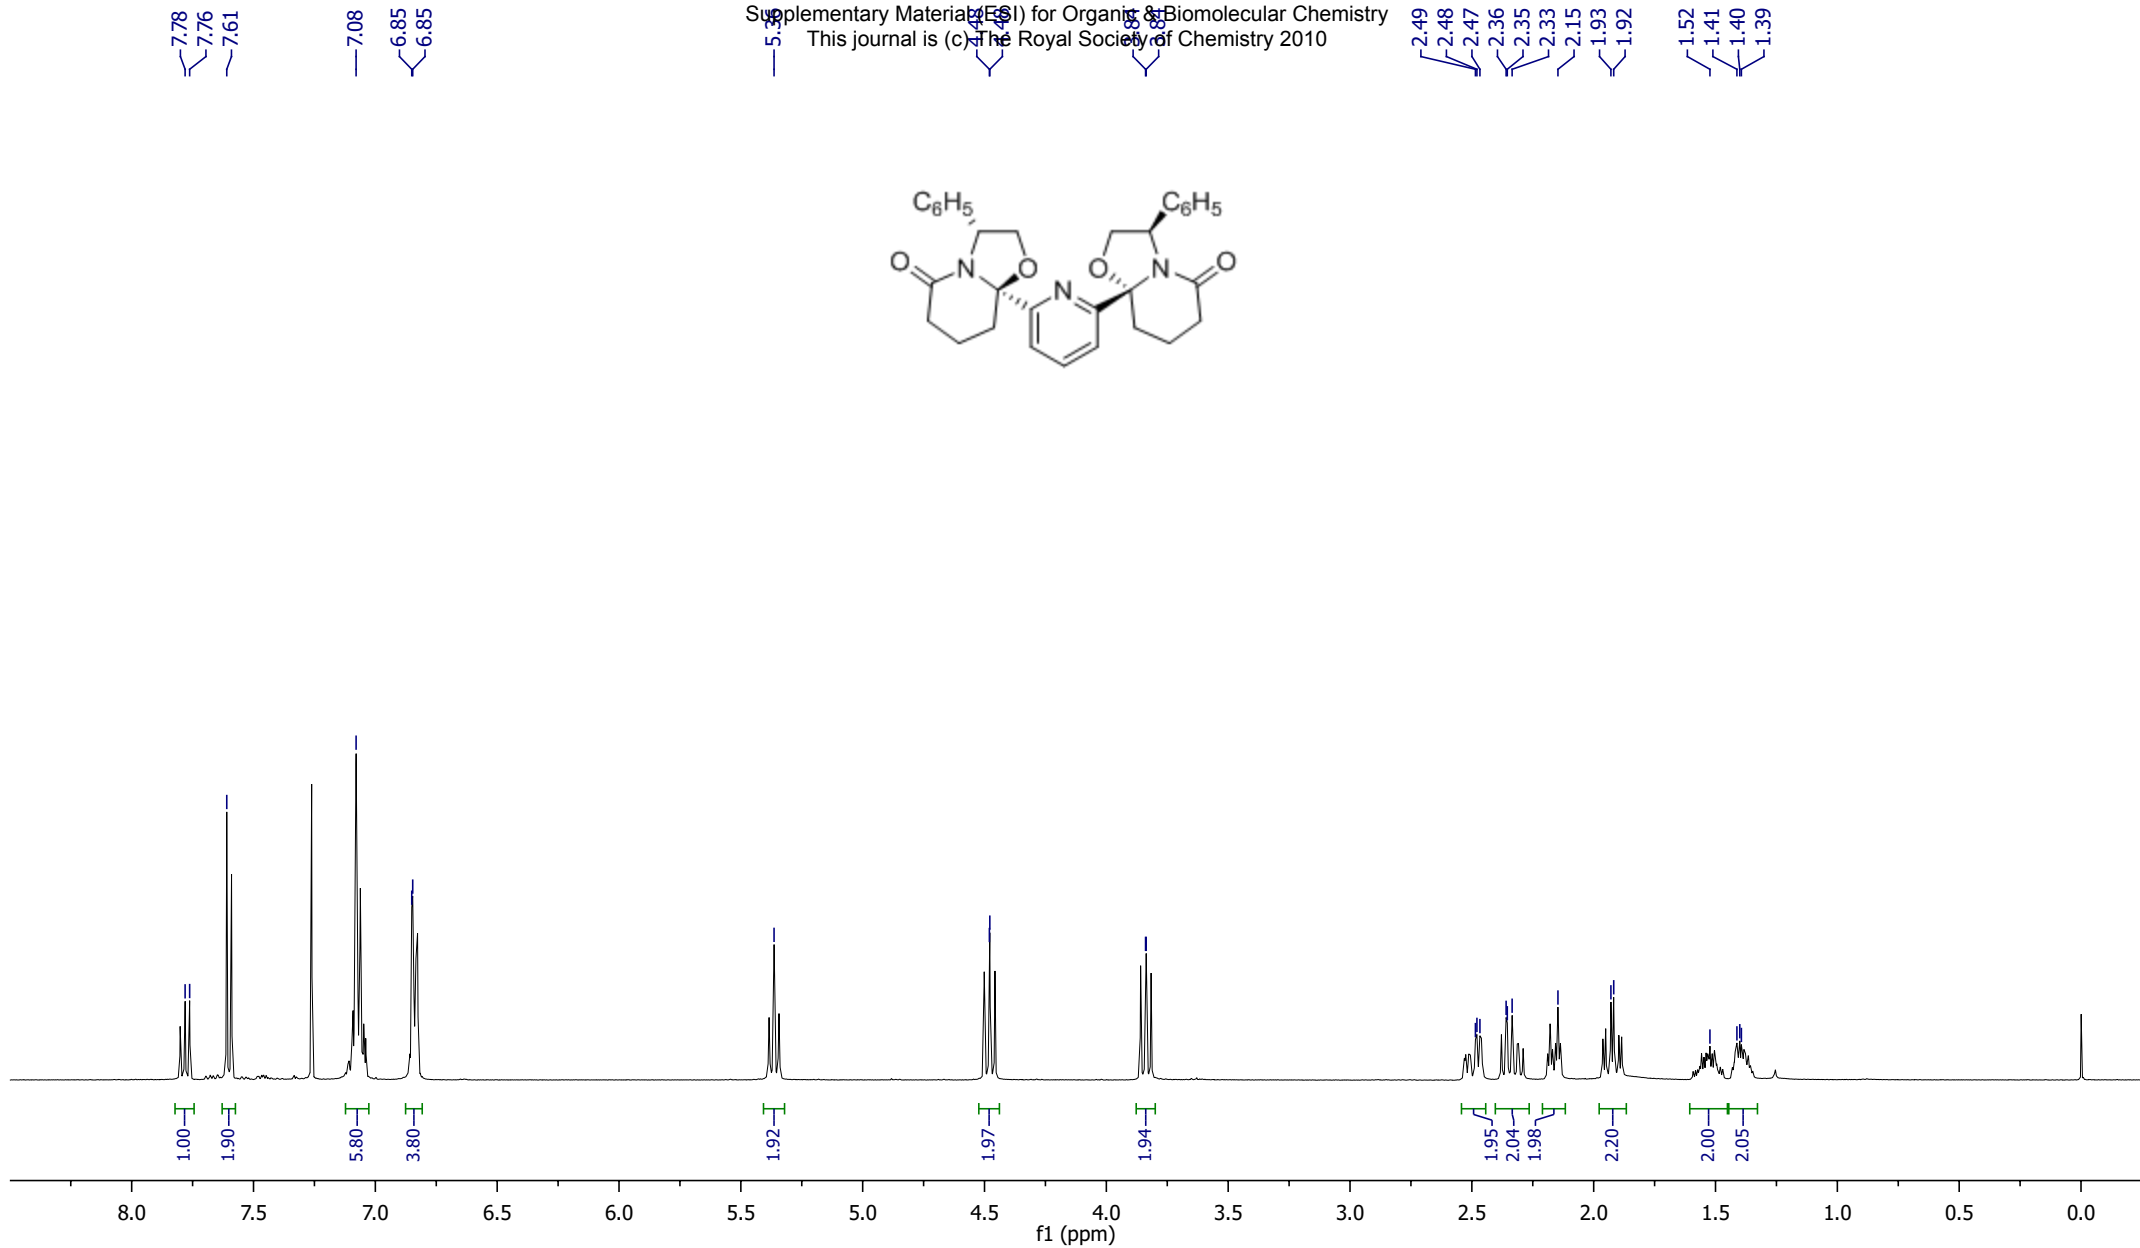

**(3R,3'R,8aR,8a'R)-2,6-Bis(5-oxo-3-phenyl-2,3,6,7,8,8a-hexahydro-5H-oxazolo[3,2-a]pyrid-8a-yl)pyridine (10)**

—180.26

—142.37

—138.71

—129.26

—128.35

—127.38

—126.59

—124.98

—122.67

—101.68

—72.70

—58.65

—35.25

—32.58

Supplementary Material (ESI) for Organic & Biomolecular Chemistry  
This journal is (c) The Royal Society of Chemistry 2010

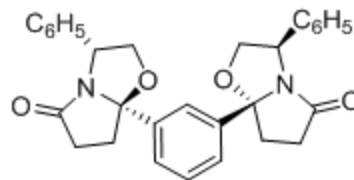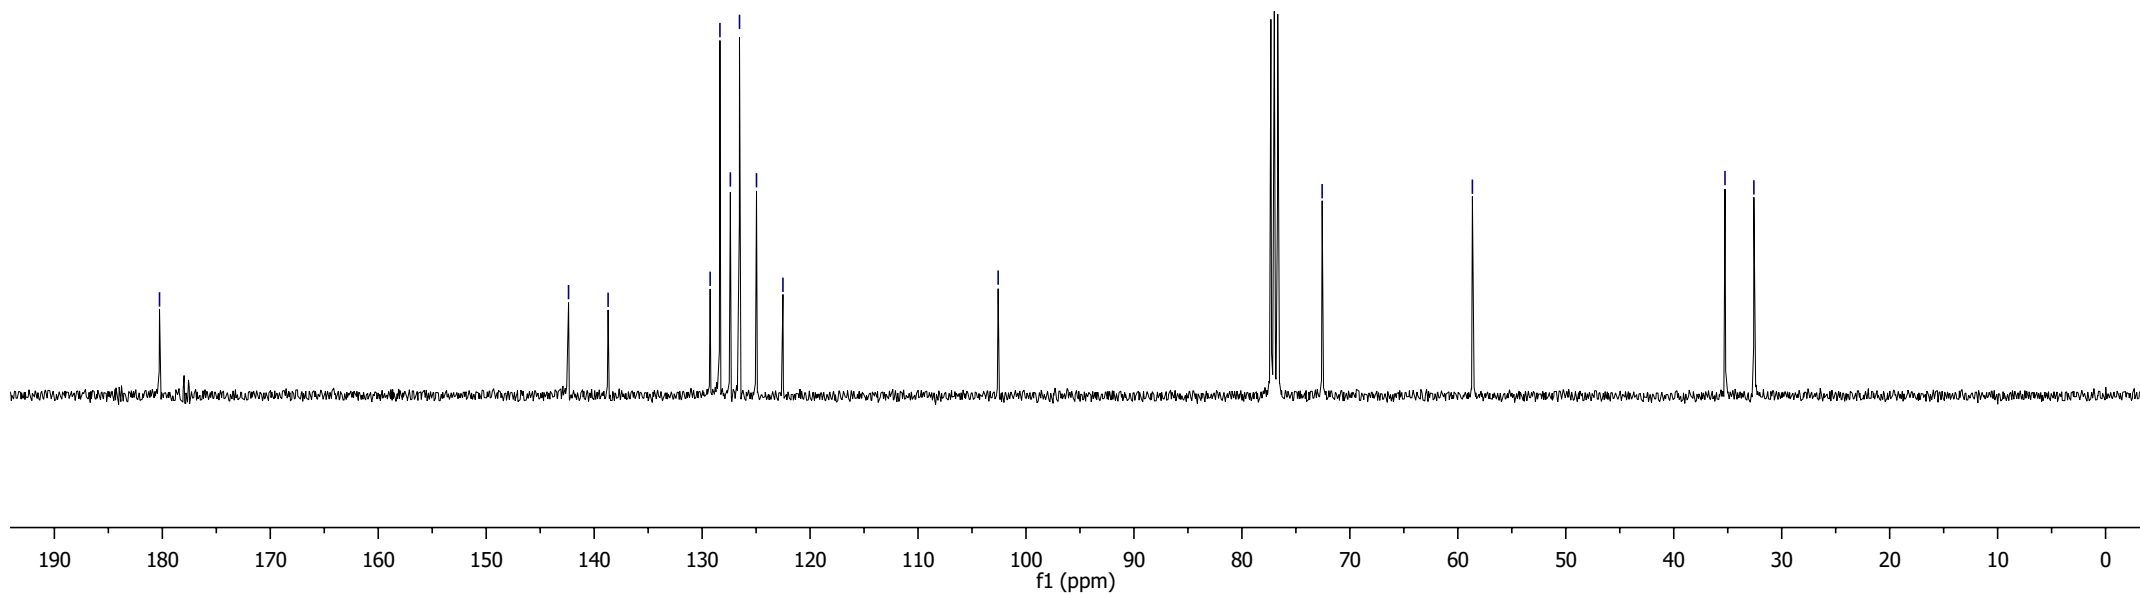

**(3R,3'R,7aR,7a'R)-1,3-Bis(5-oxo-3-phenyl-2,3,5,6,7,7a-hexahydropyrrolo[2,1-b]oxazol-7a-yl)benzene (11)**

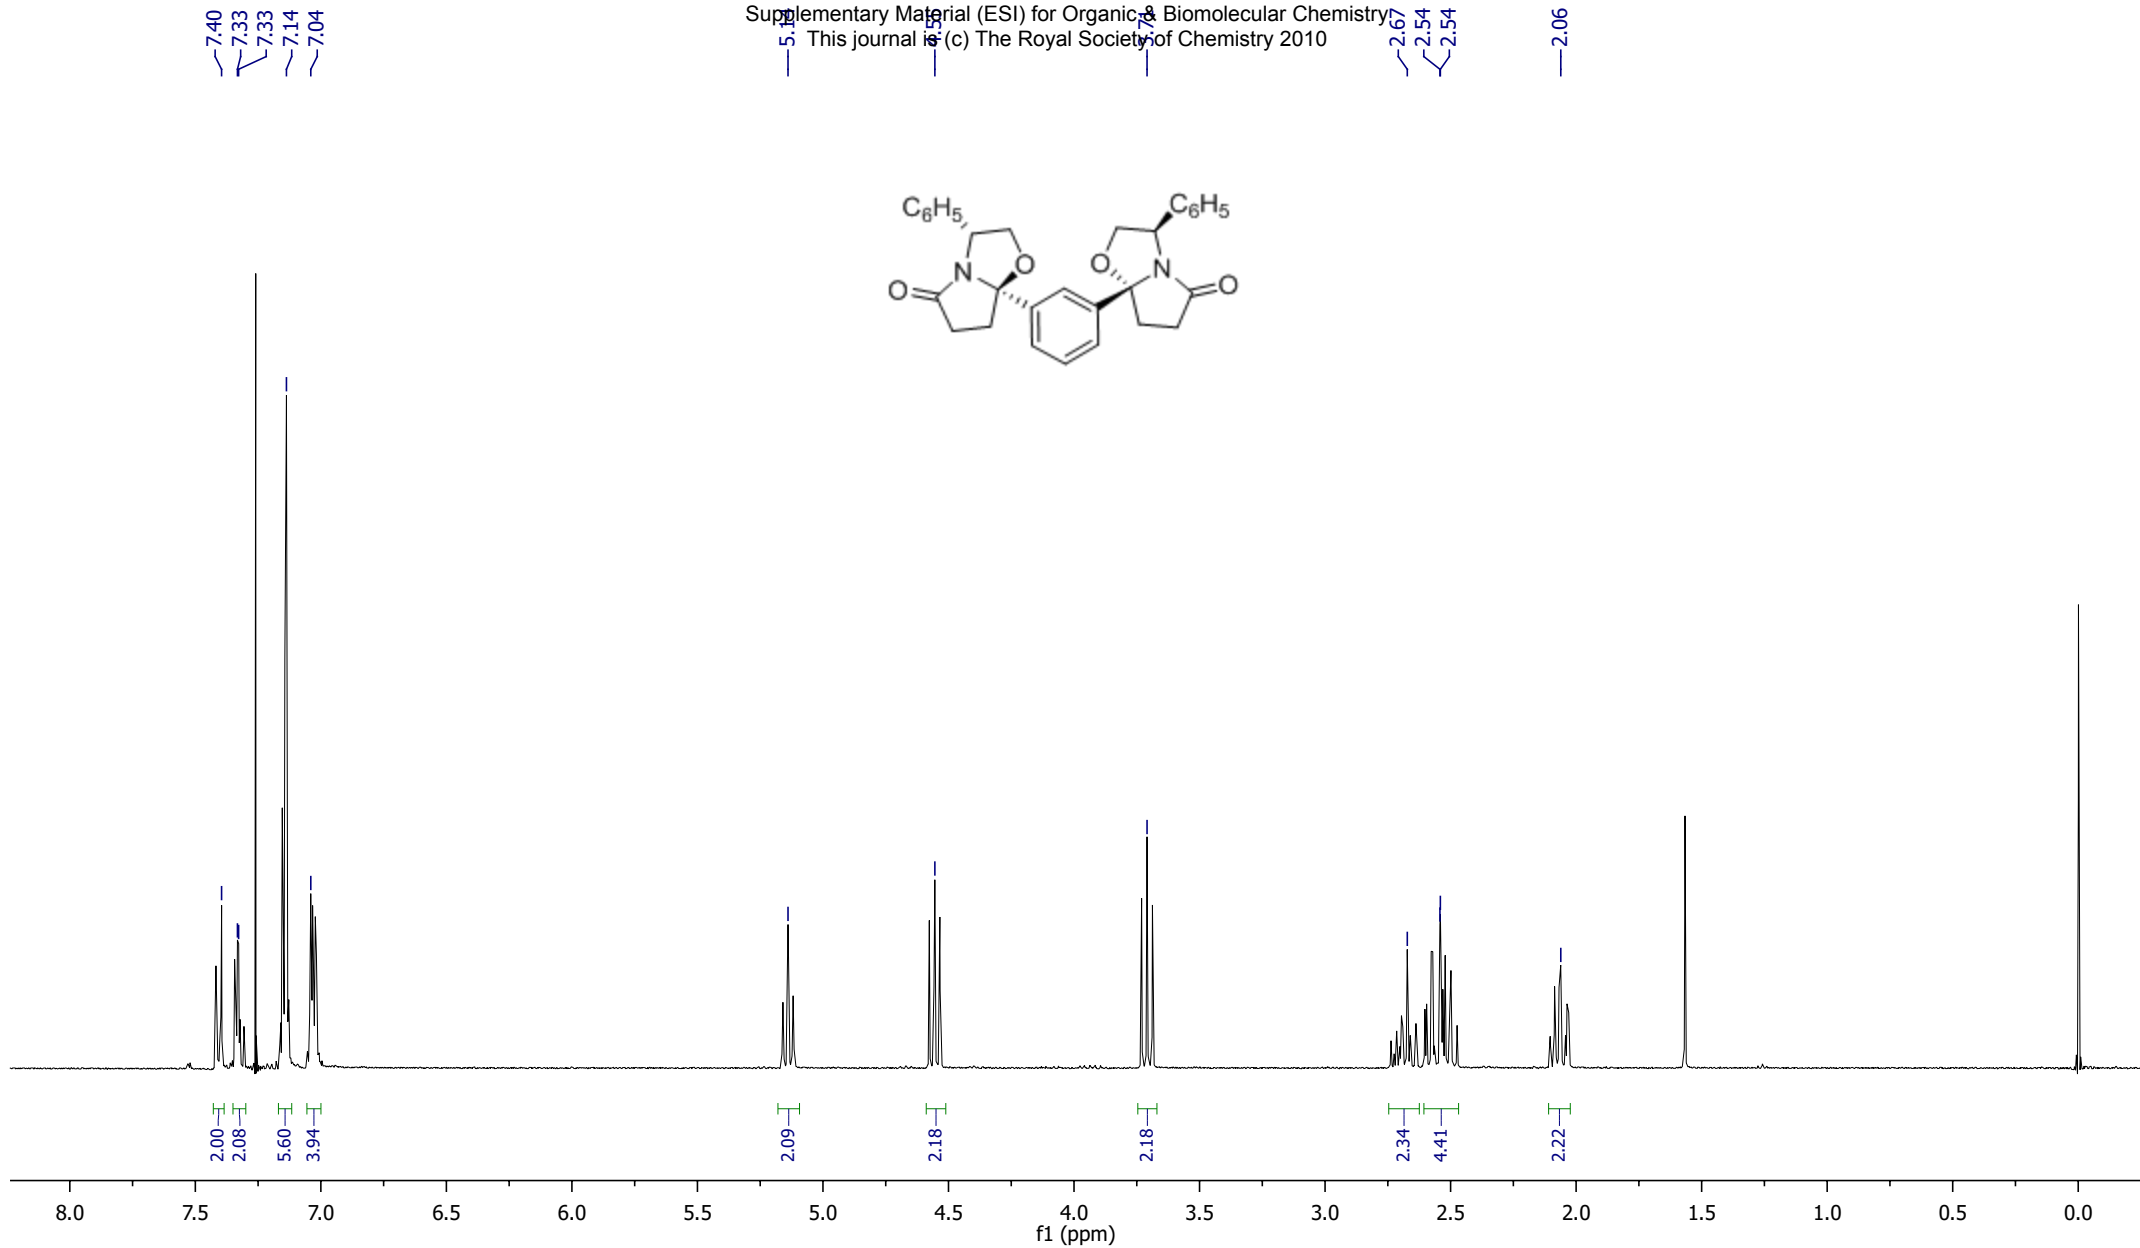

**(3R,3'R,7aR,7a'R)-1,3-Bis(5-oxo-3-phenyl-2,3,5,6,7,7a-hexahydropyrrolo[2,1-b]oxazol-7a-yl)benzene (11)**

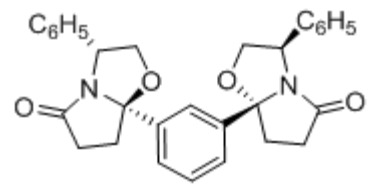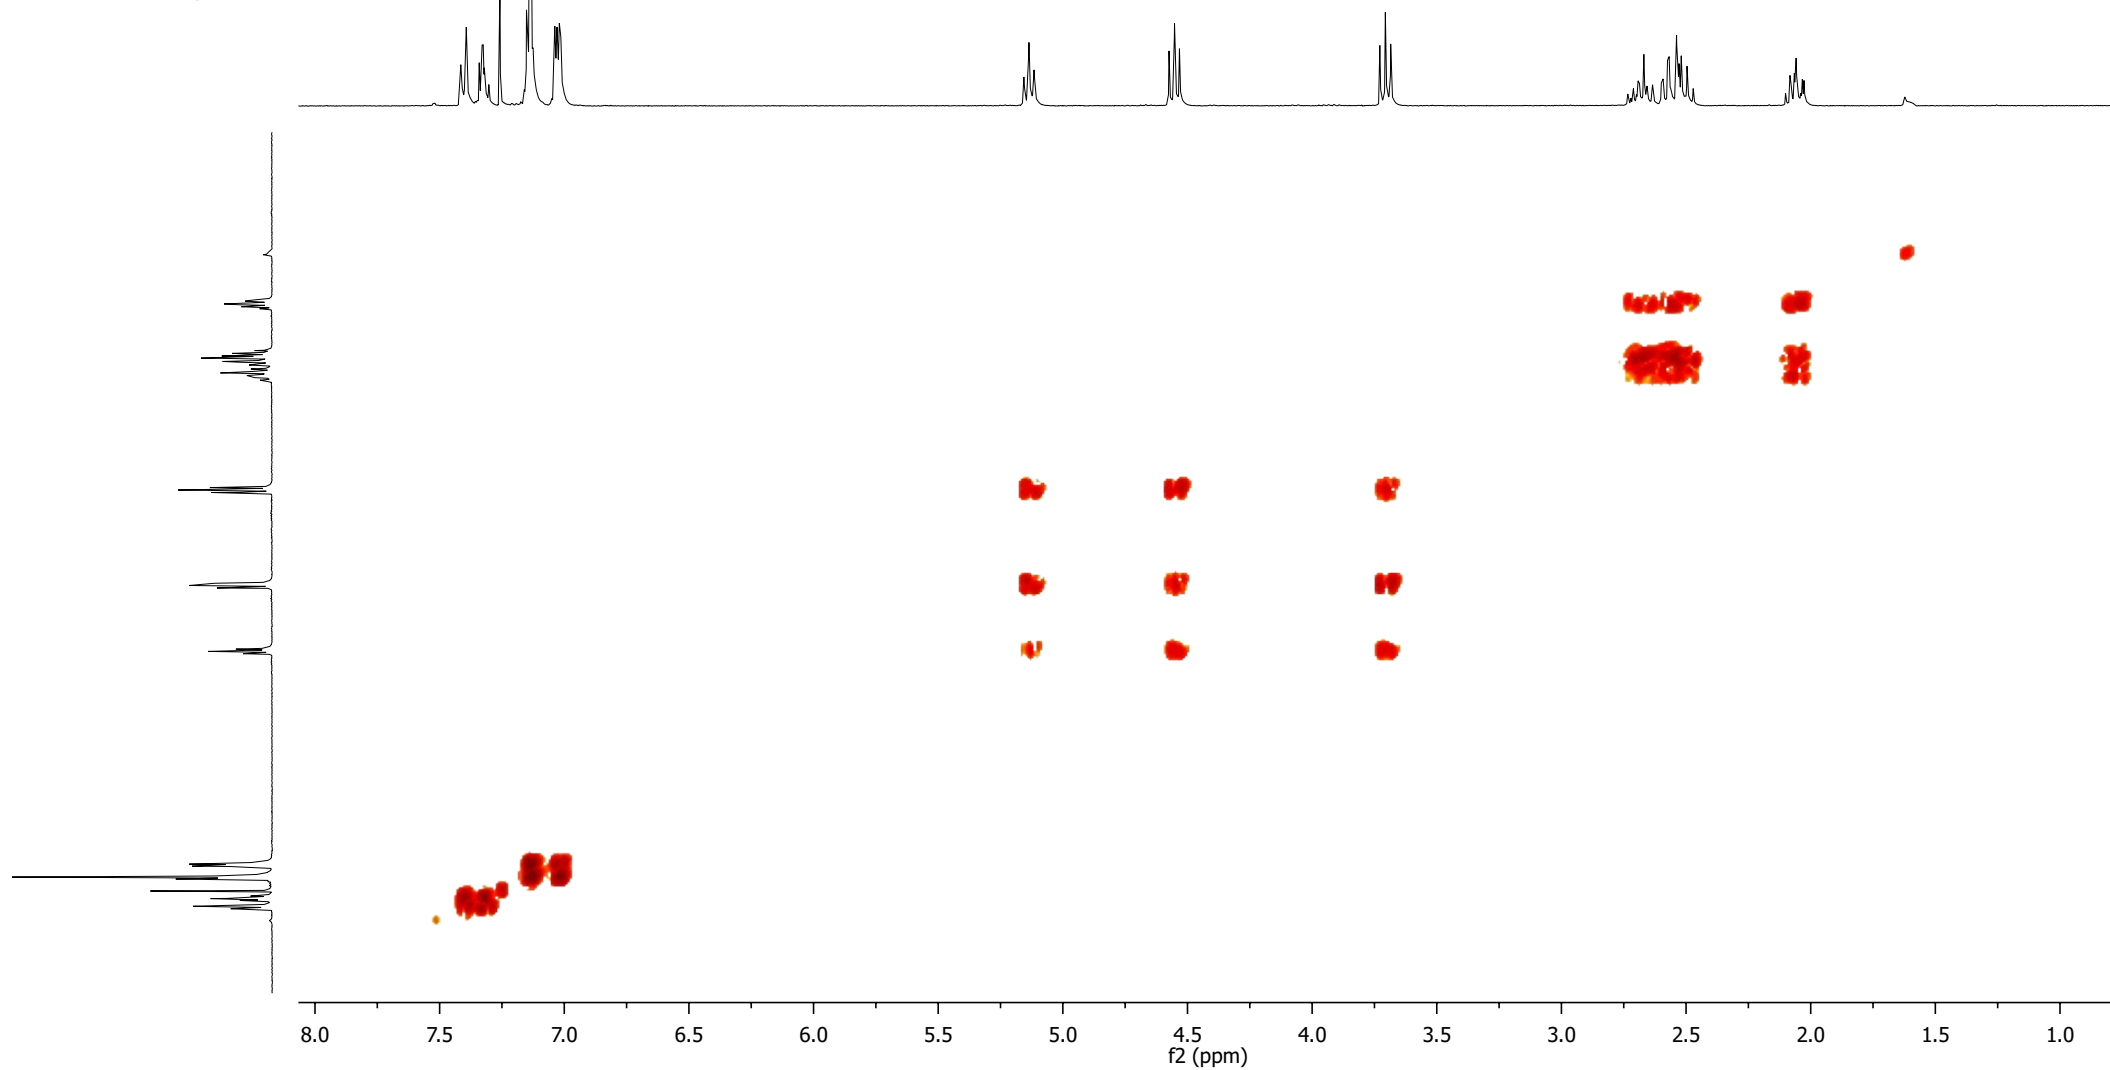

**(3R,3'R,7aR,7a'R)-1,3-Bis(5-oxo-3-phenyl-2,3,5,6,7,7a-hexahydropyrrolo[2,1-b]oxazol-7a-yl)benzene (11)**



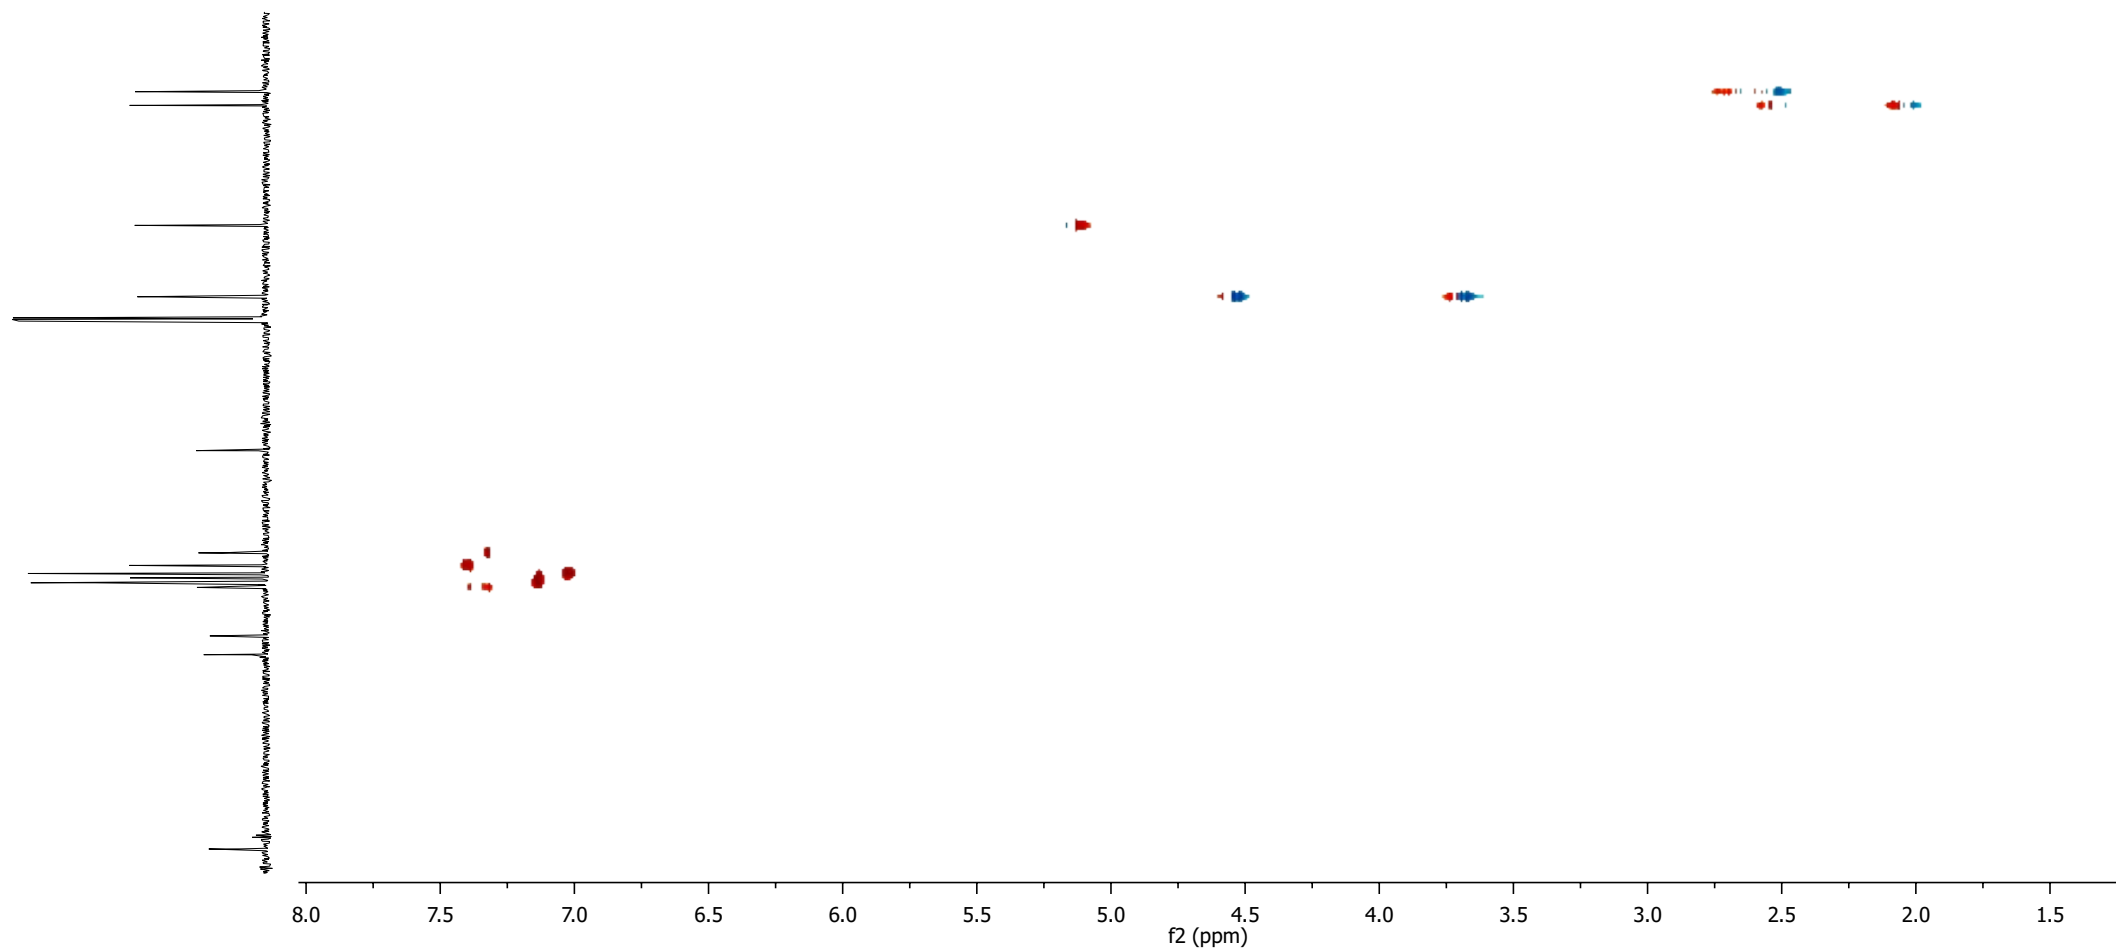

**(3*R*,3'*R*,7*aR*,7*a'**R*)-1,3-Bis(5-oxo-3-phenyl-2,3,5,6,7,7*a*-hexahydropyrrolo[2,1-*b*]oxazol-7*a*-yl)benzene (11)**

—177.35

—140.52

—137.24

—129.13

—128.67

—128.24

—127.87

—127.40

—126.58

Supplementary Material (ESI) for Organic & Biomolecular Chemistry  
This journal is (c) The Royal Society of Chemistry 2010

—64.35

—64.00

—63.15

—31.34

—28.74

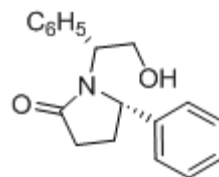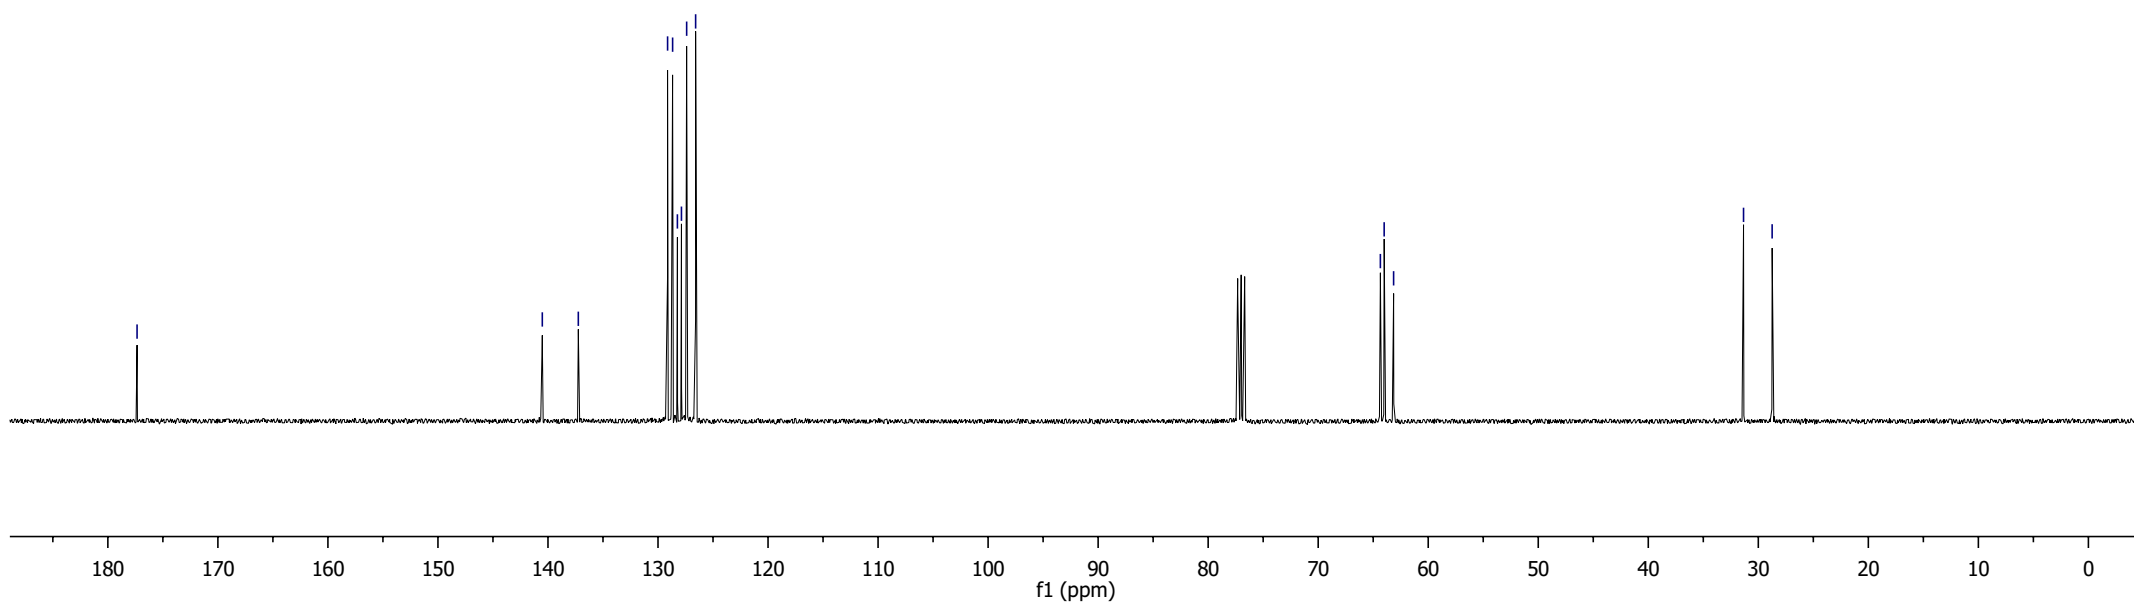

**(5S)-1-[(1R)-2-Hydroxy-1-phenylethyl]-5-phenyl-2-pyrrolidone (12)**

7.38  
7.36  
7.30  
7.16

2.78  
2.76  
2.60  
2.58  
2.44  
2.44

1.98  
1.96  
1.95

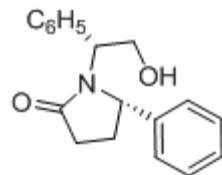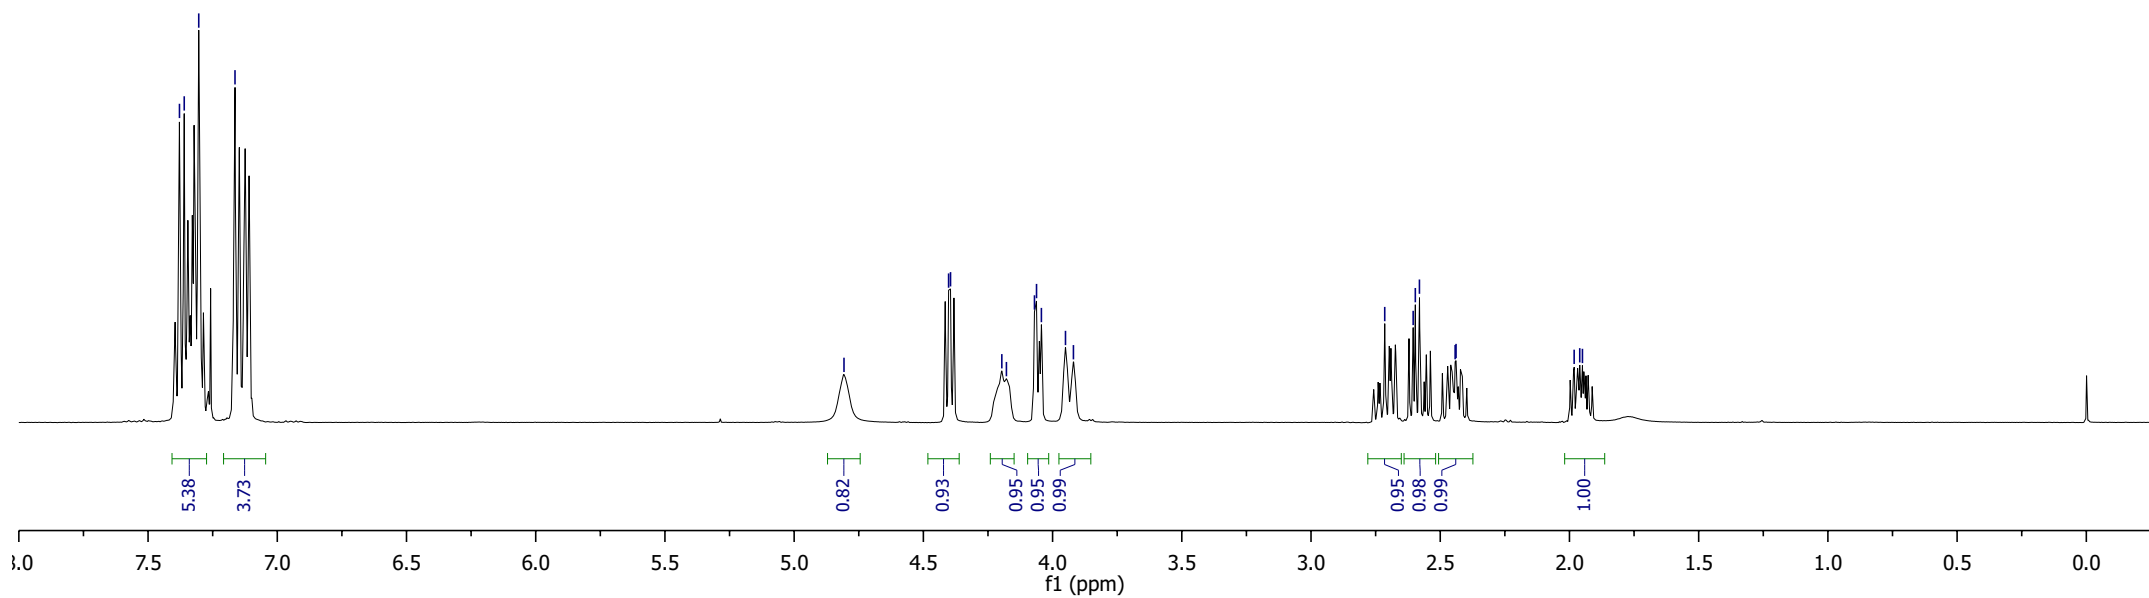

**(5S)-1-[(1R)-2-Hydroxy-1-phenylethyl]-5-phenyl-2-pyrrolidone (12)**

—176.73

—140.51

—137.78

—128.81

—128.61

—128.21

—128.19

—127.83

—127.15

Supplementary Material (ESI) for Organic & Biomolecular Chemistry  
This journal is (c) The Royal Society of Chemistry 2010

—62.86

—60.28

—44.07

—31.13

—29.25

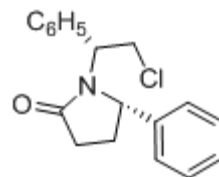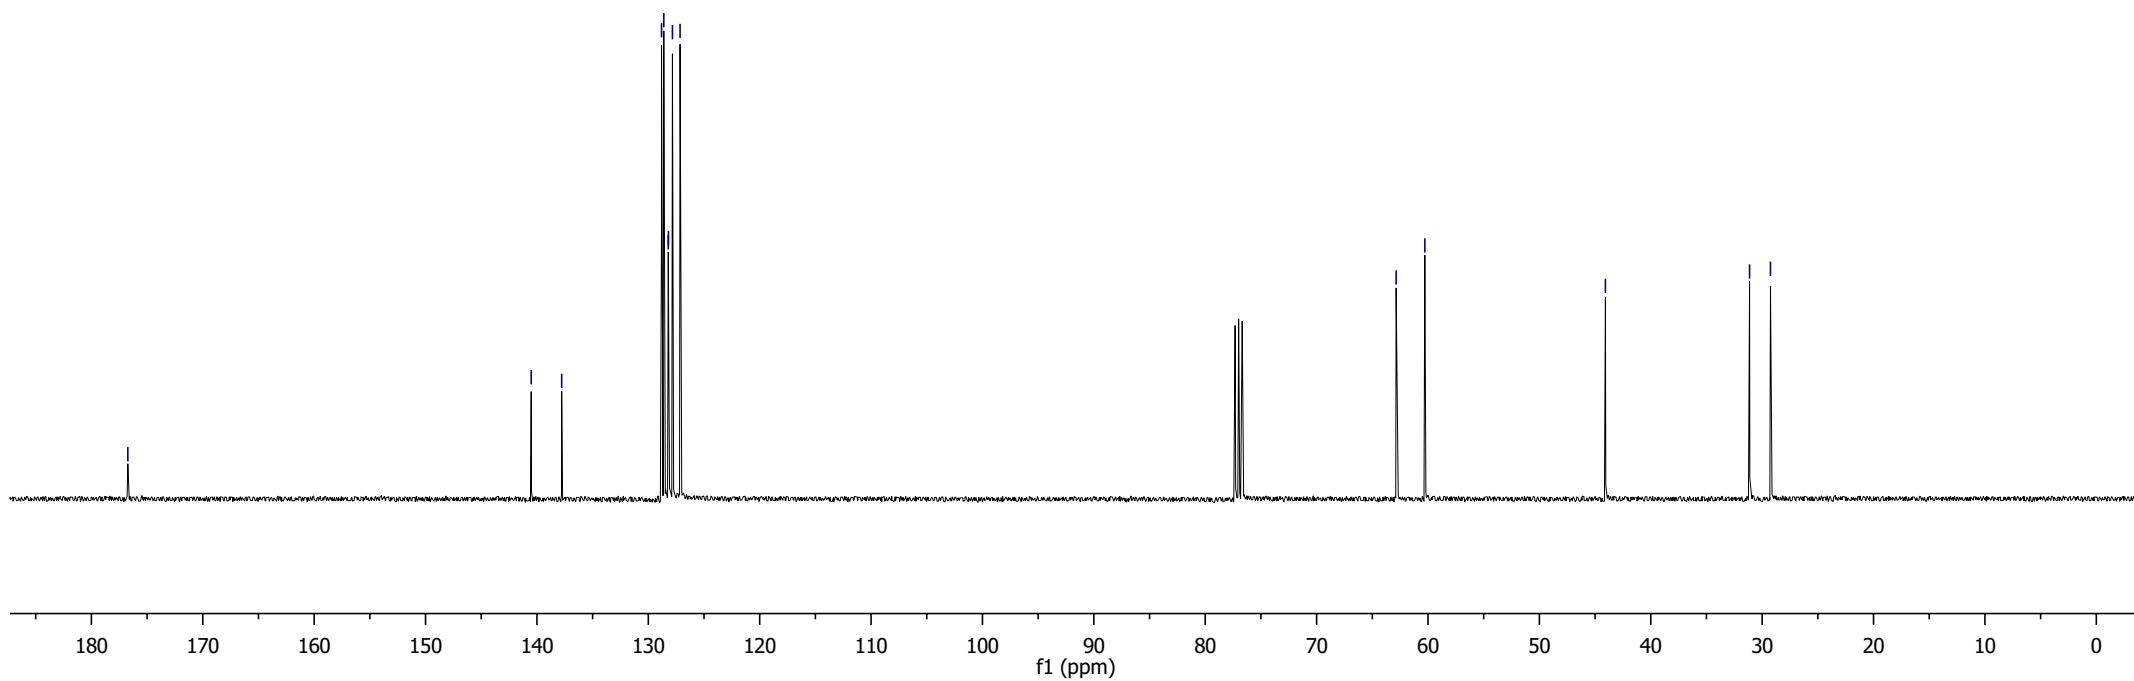

**(5S)-1-[(1R)-2-Chloro-1-phenylethyl]-5-phenyl-2-pyrrolidone (13)**

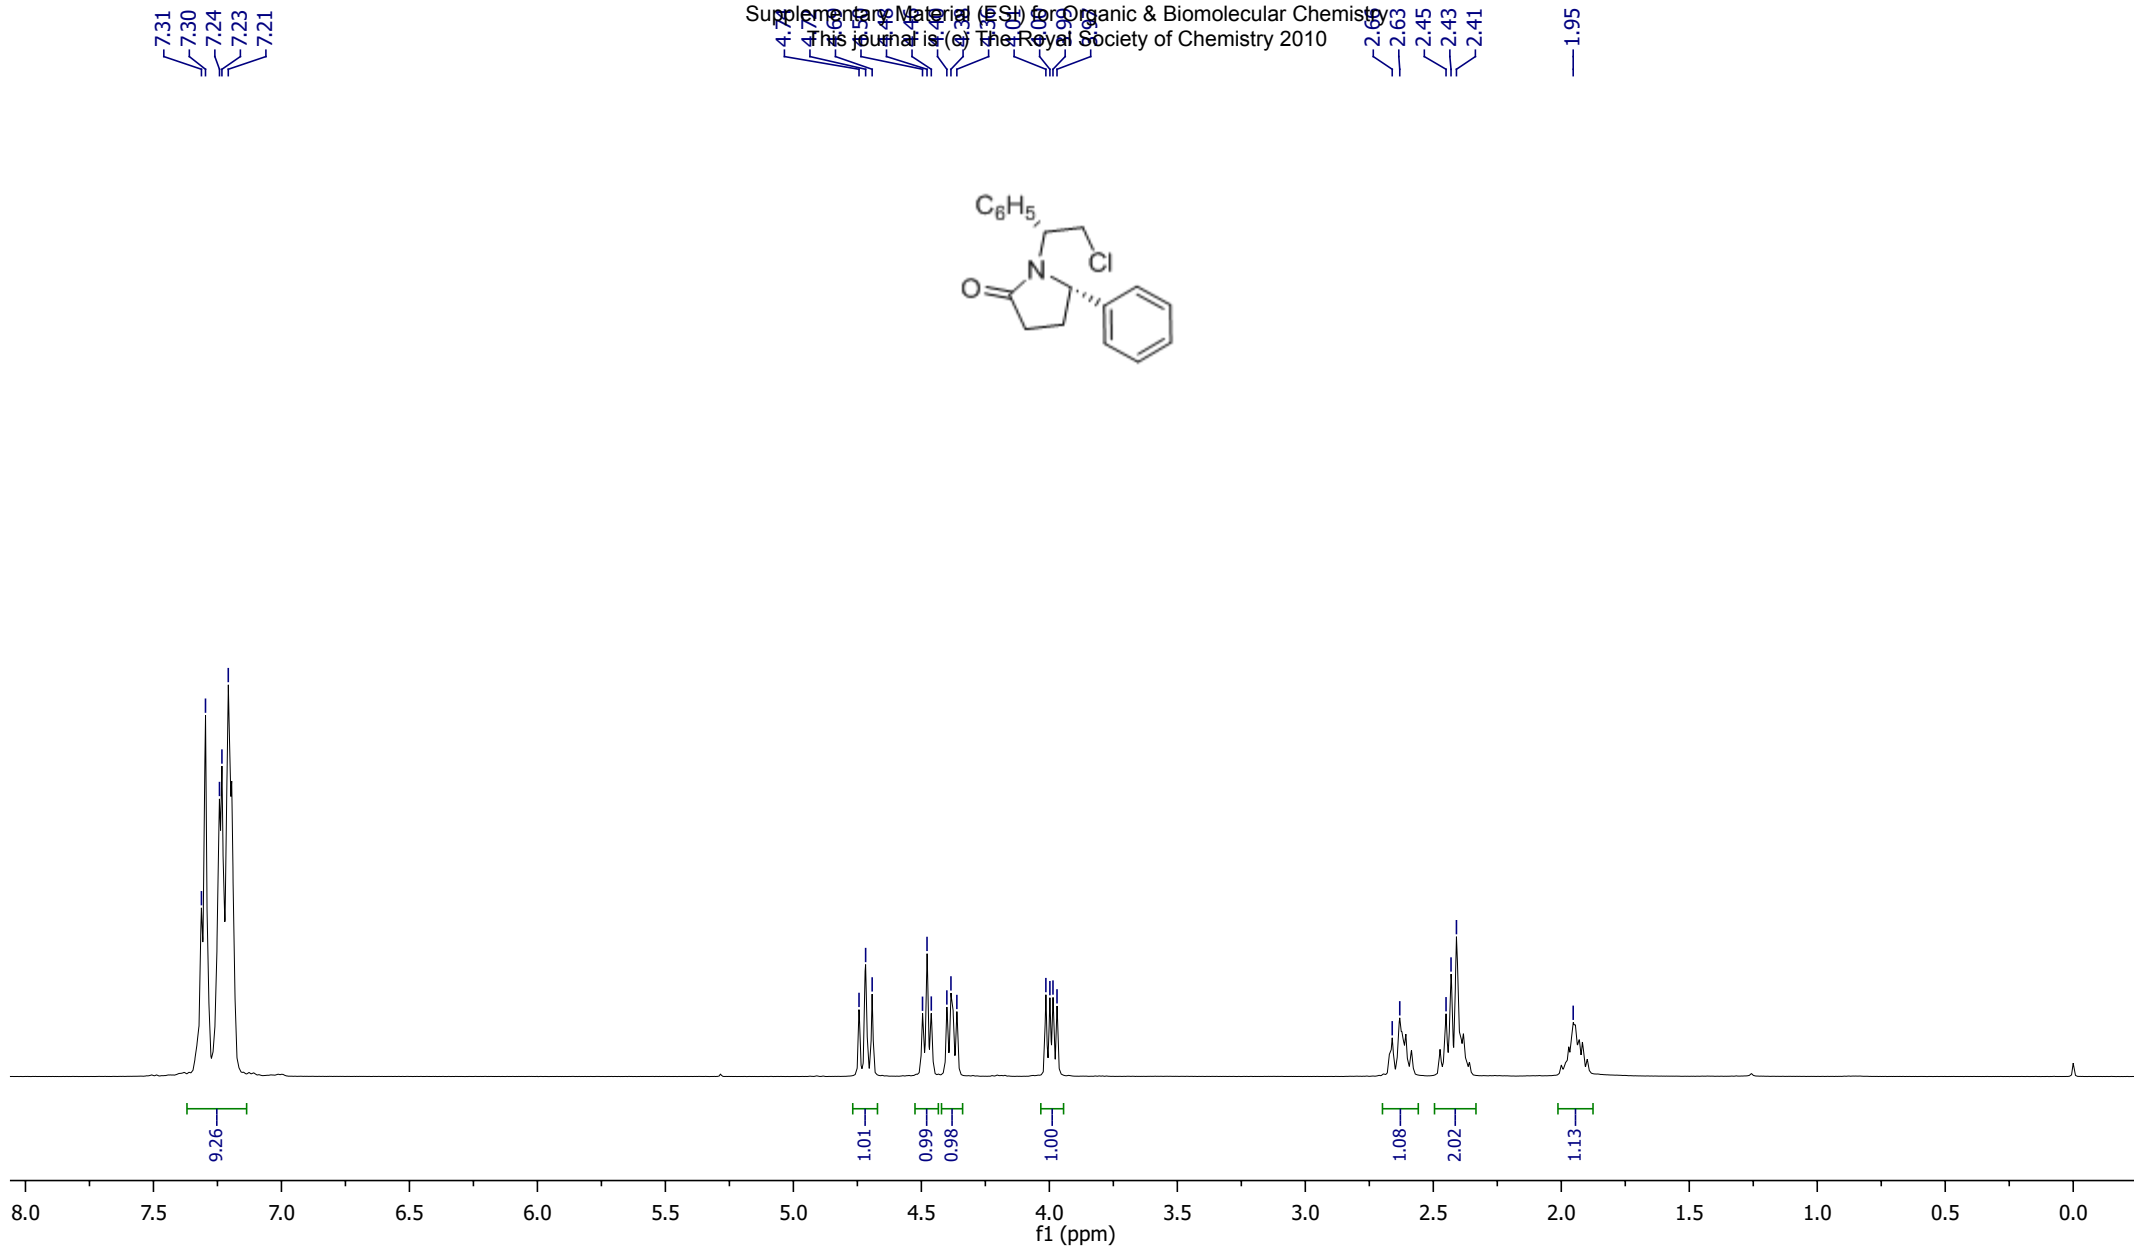

(5S)-1-[(1R)-2-Chloro-1-phenylethyl]-5-phenyl-2-pyrrolidone (13)

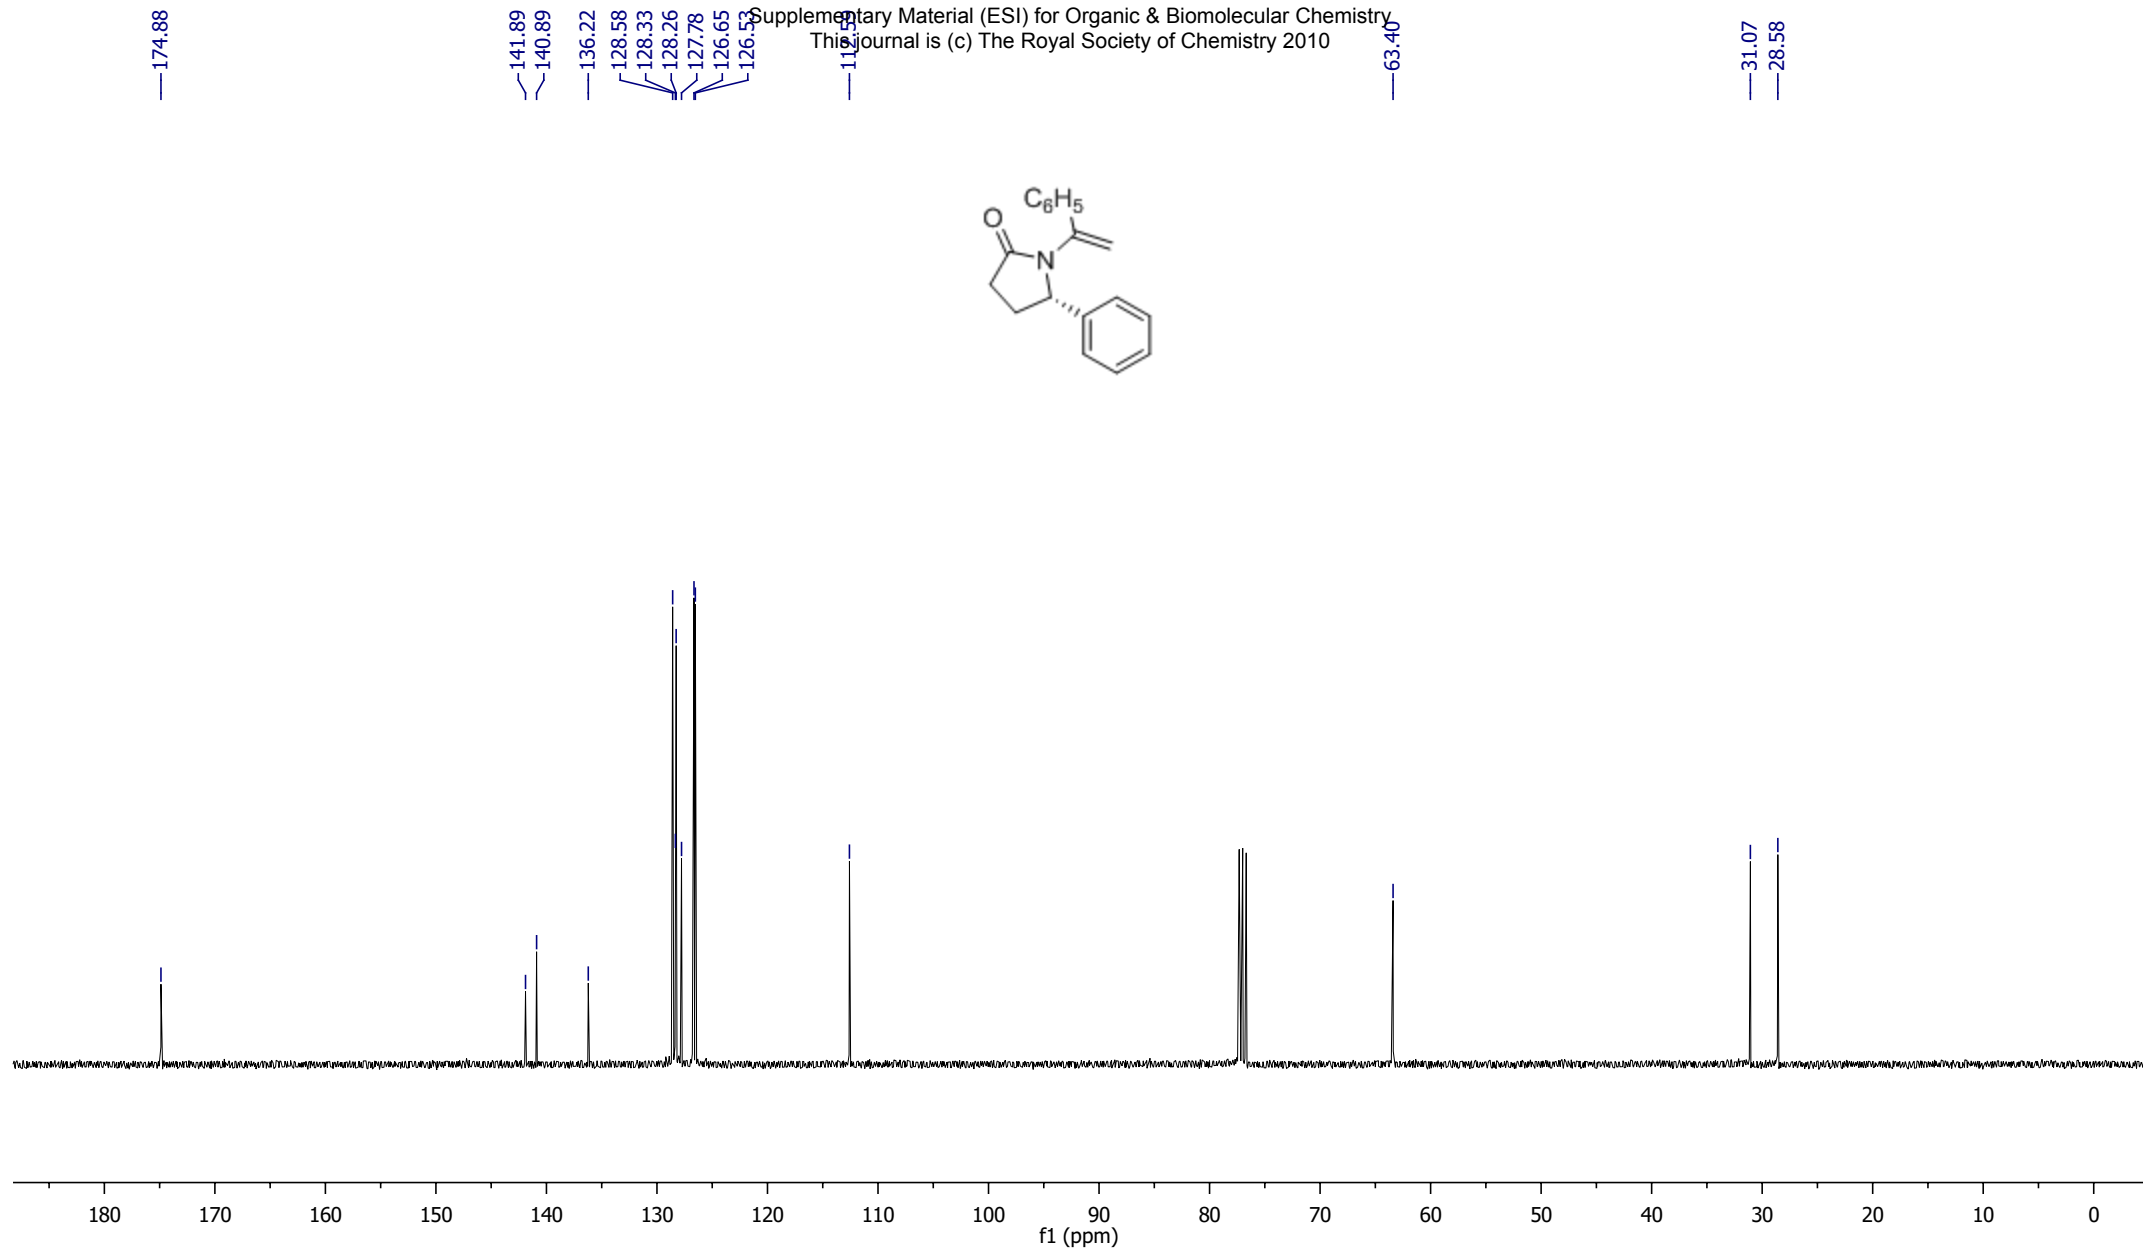

**(S)-5-Phenyl-1-(1-phenylvinyl)-2-pyrrolidone (14)**

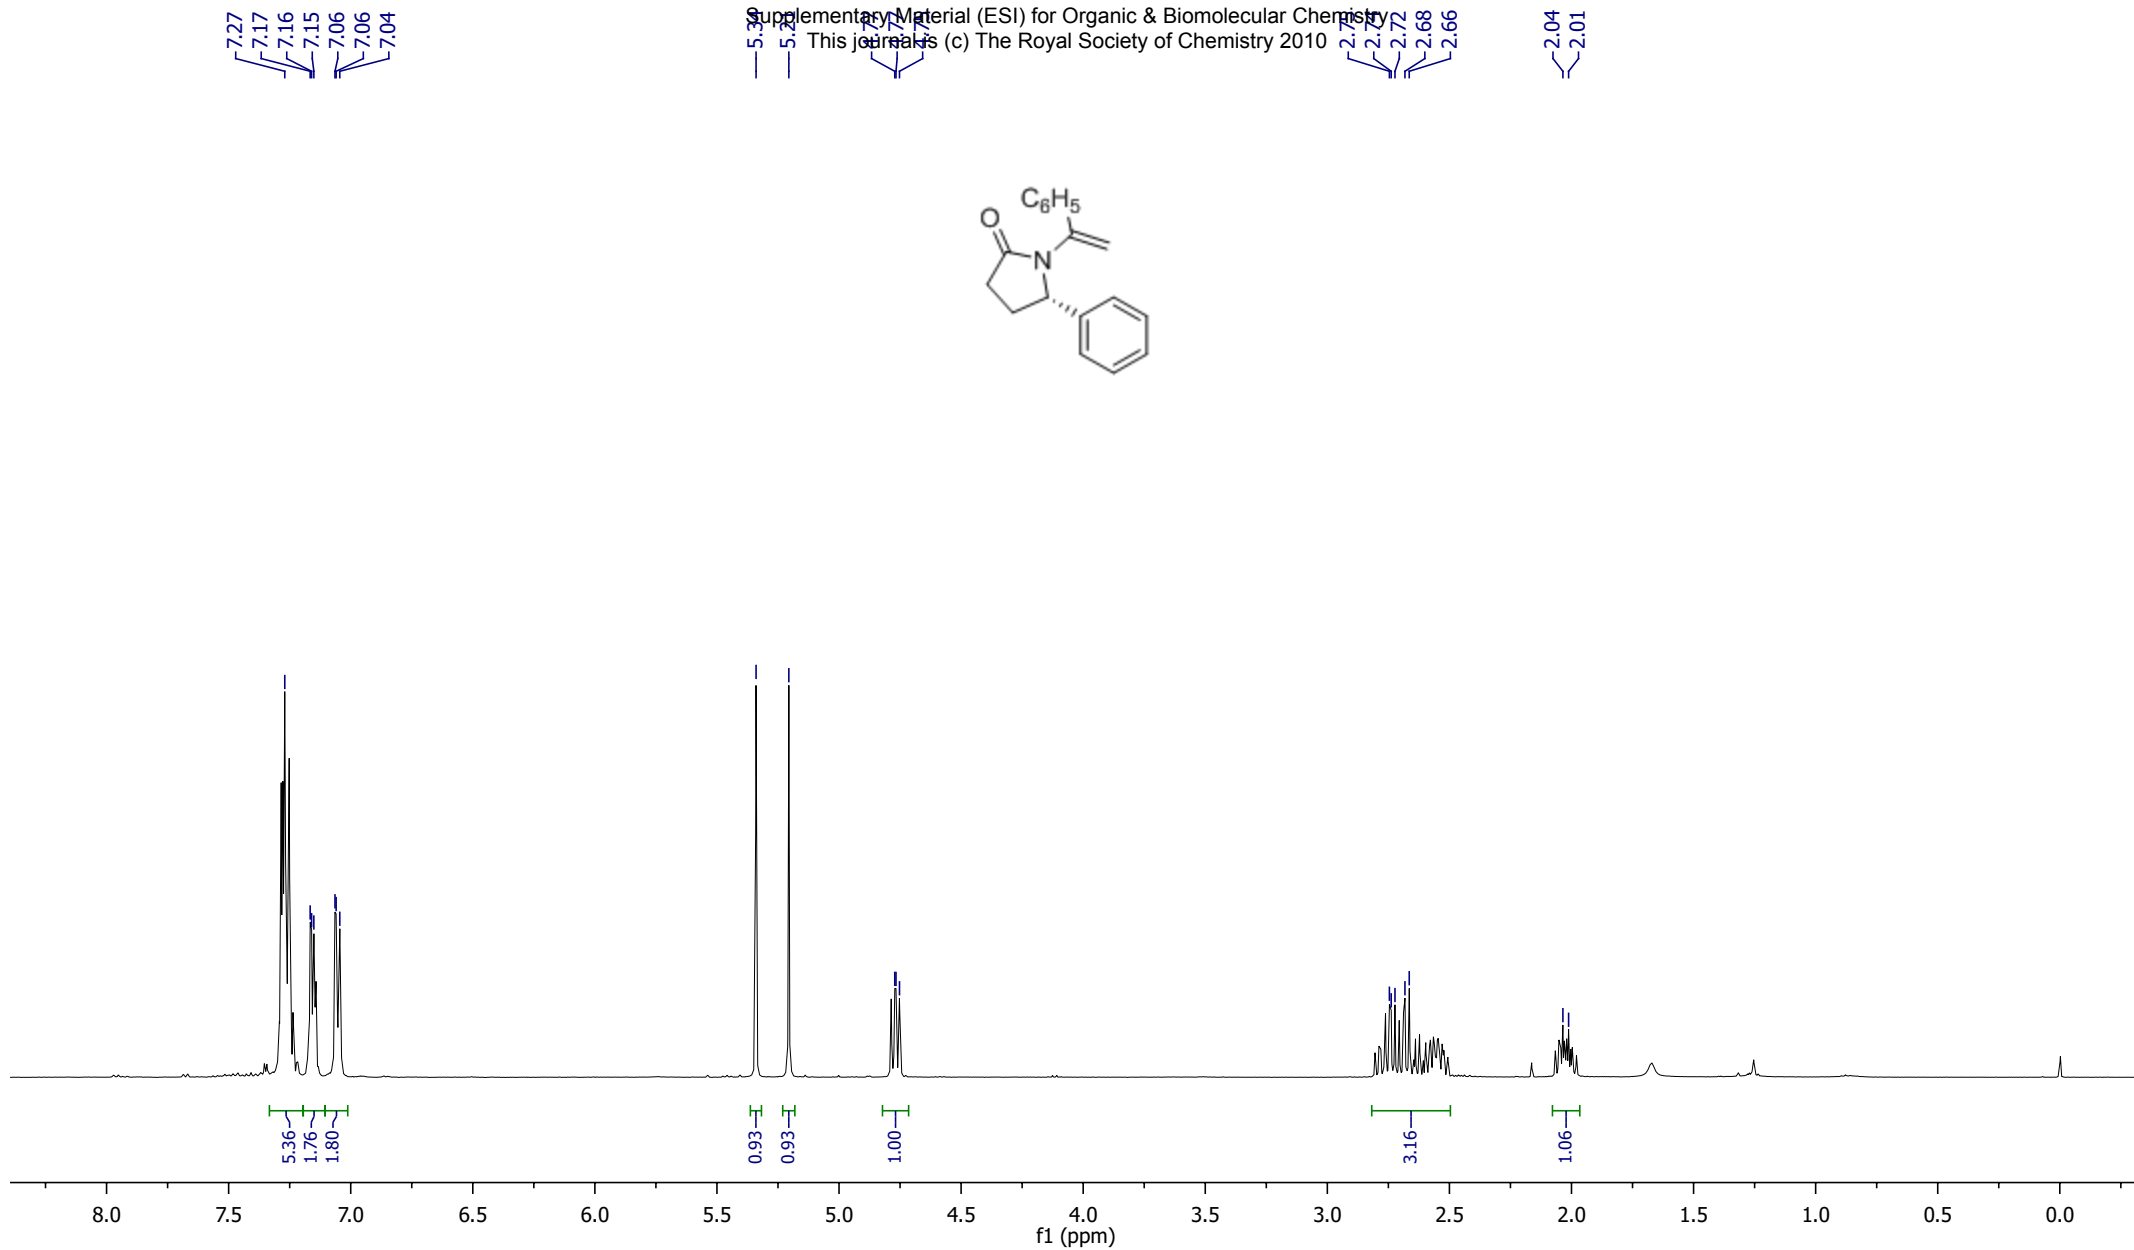

**(S)-5-Phenyl-1-(1-phenylvinyl)-2-pyrrolidone (14)**

—178.59

—142.48

—128.83

—127.81

—125.56

Supplementary Material (ESI) for Organic & Biomolecular Chemistry  
This journal is (c) The Royal Society of Chemistry 2010

—58.05

—31.28

—30.28

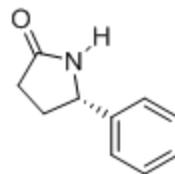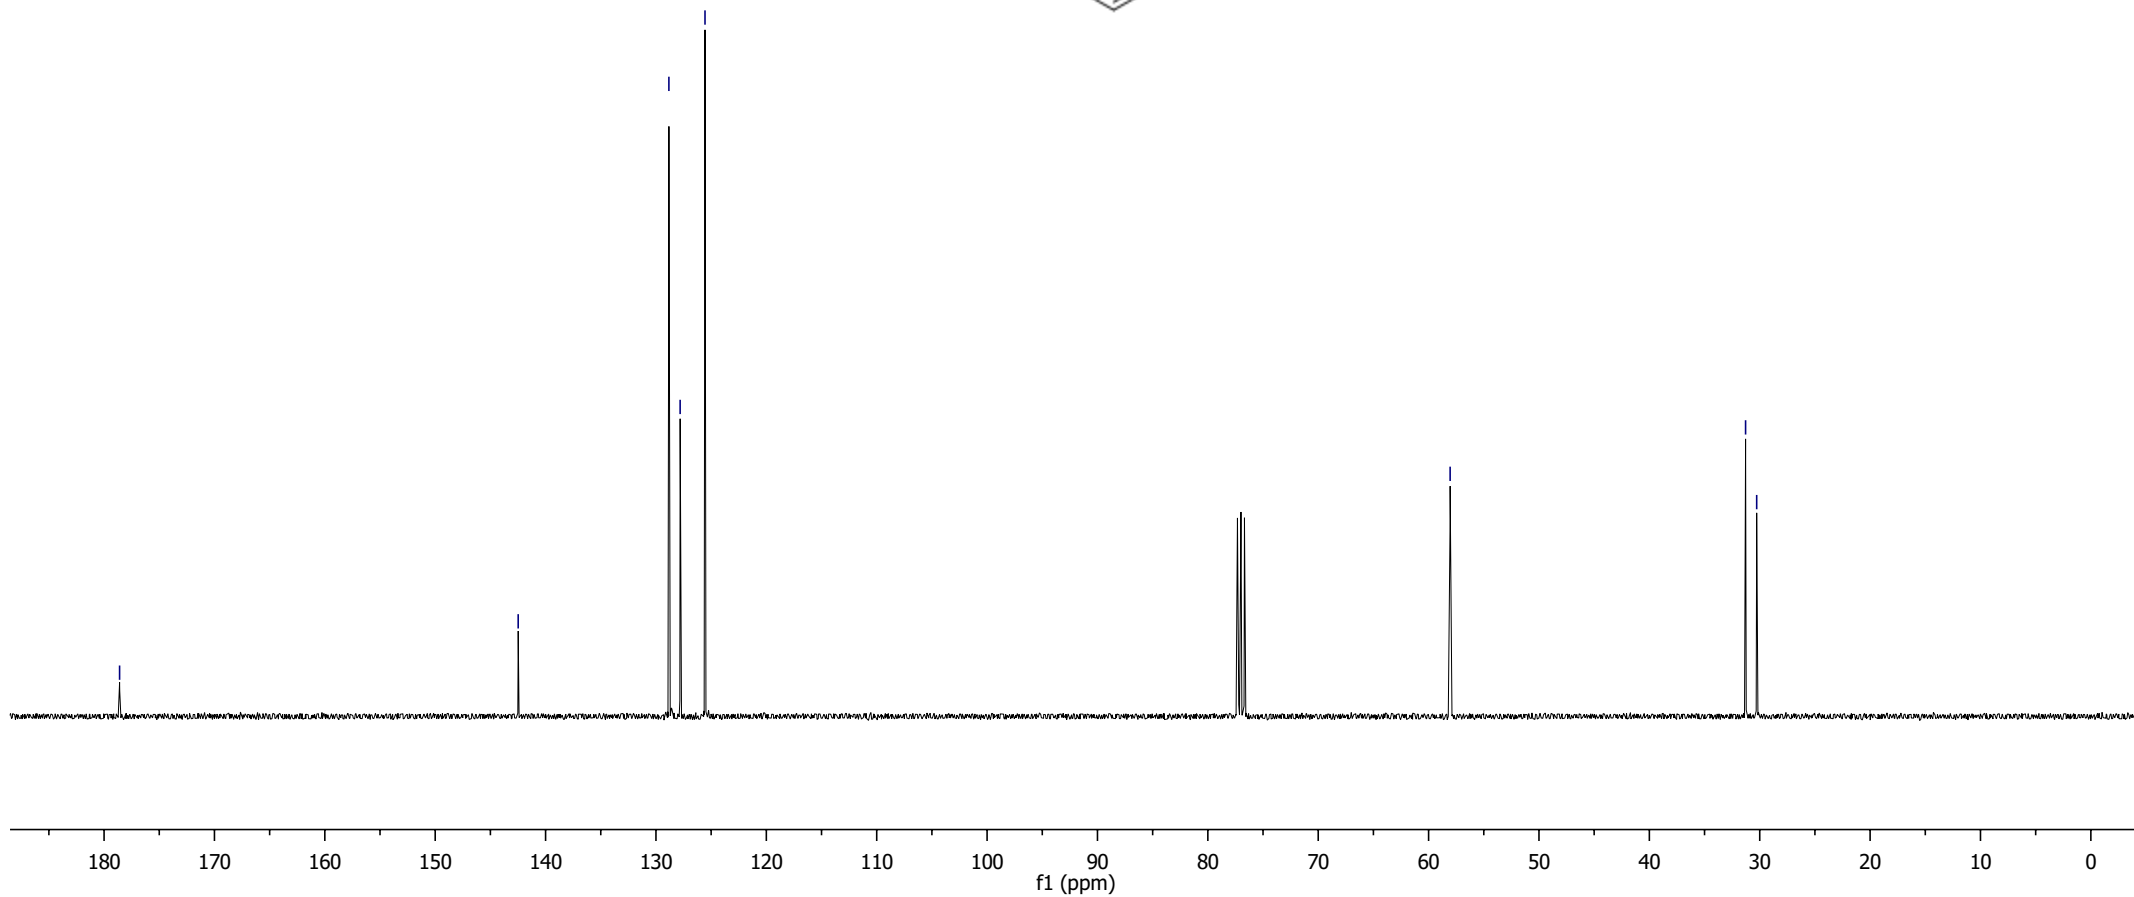

**(S)-5-Phenyl-2-pyrrolidone (15)**



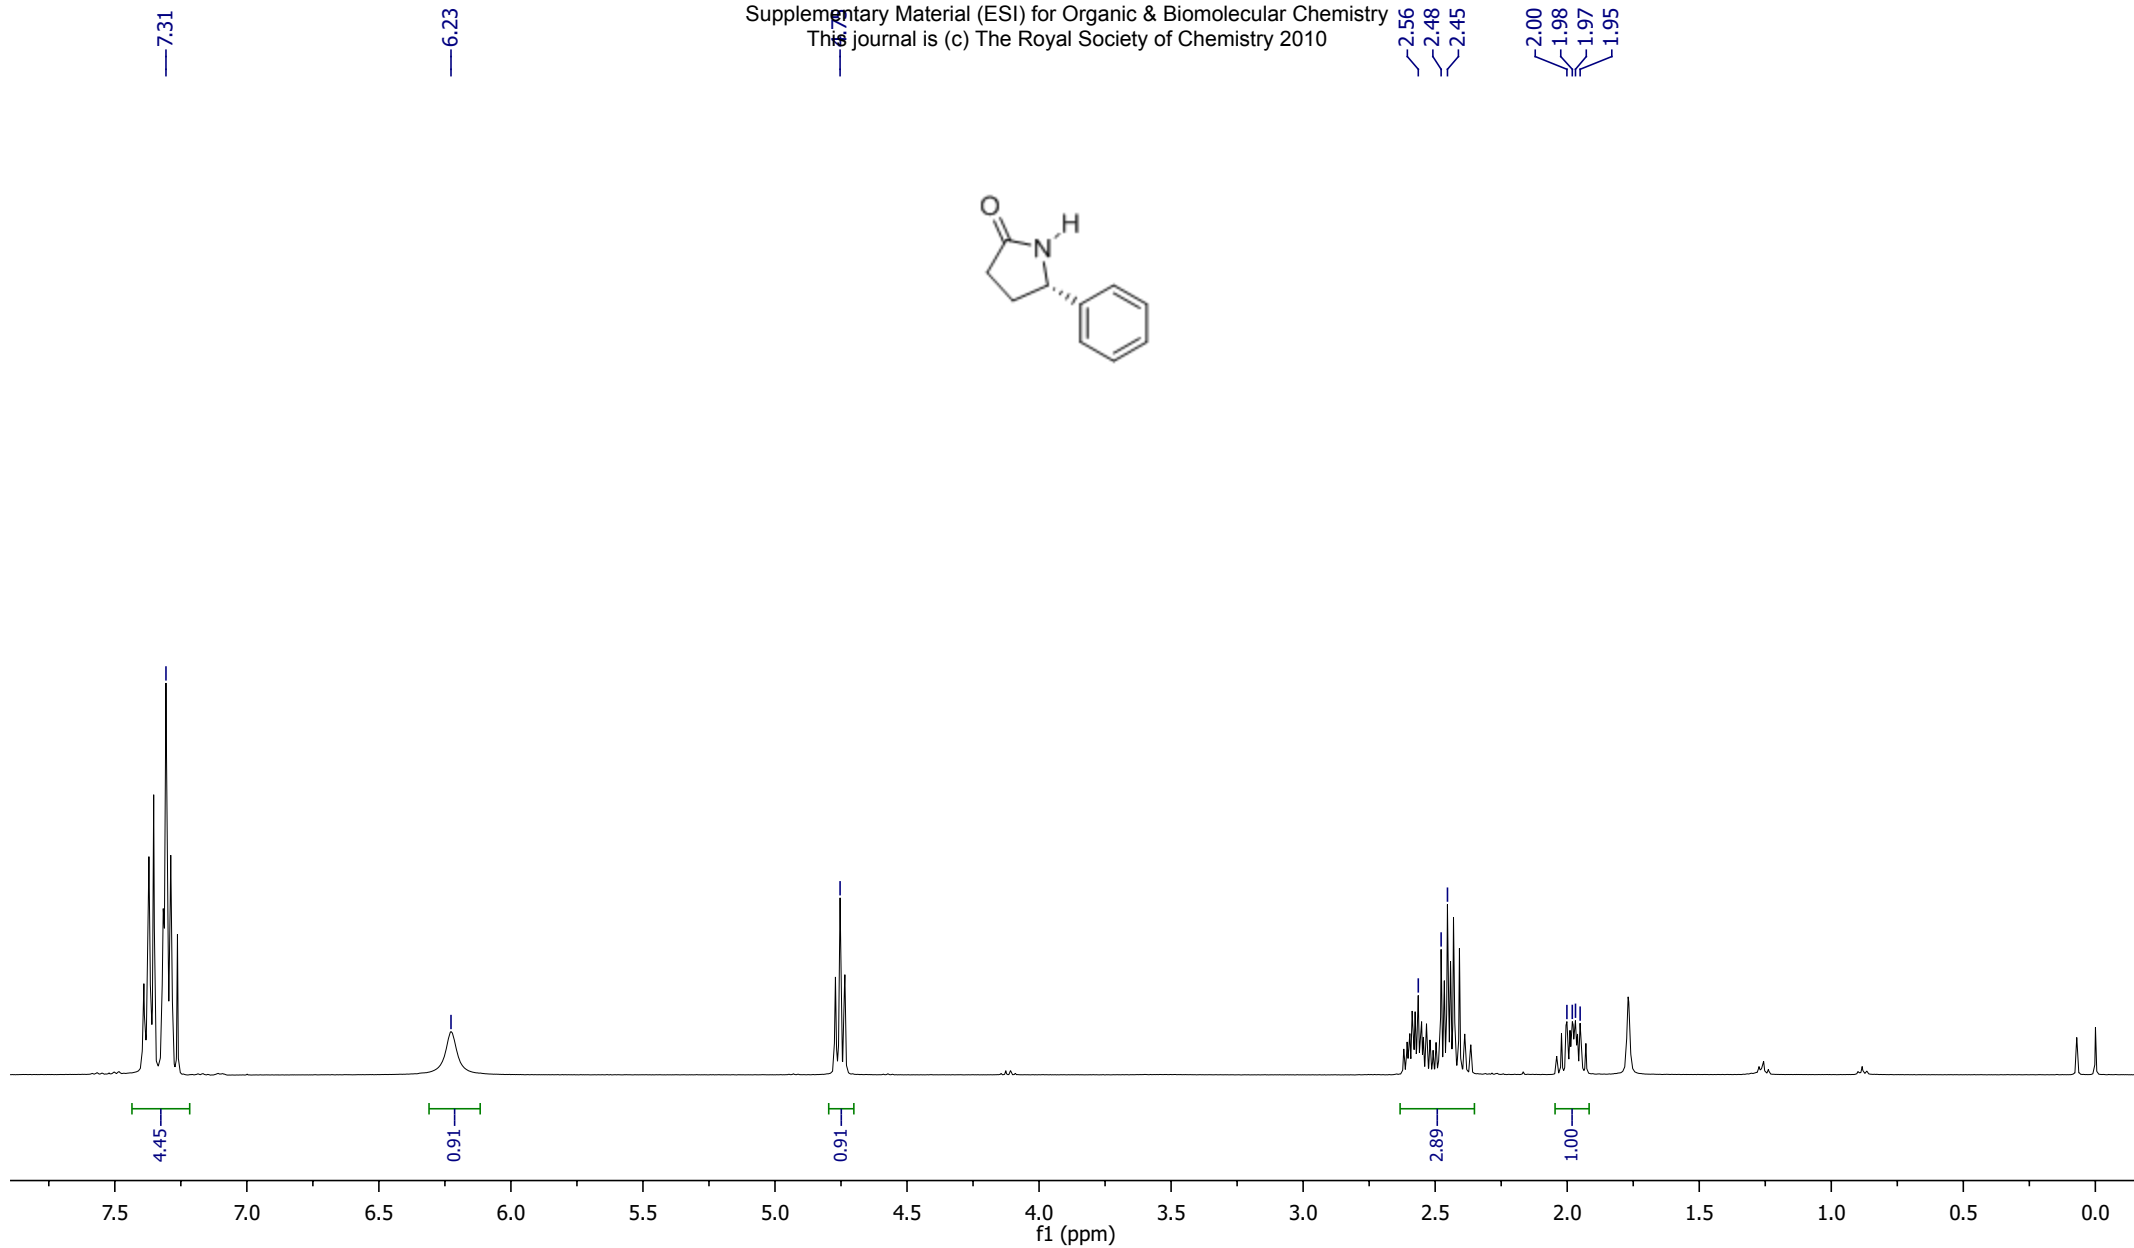

**(S)-5-Phenyl-2-pyrrolidone (15)**

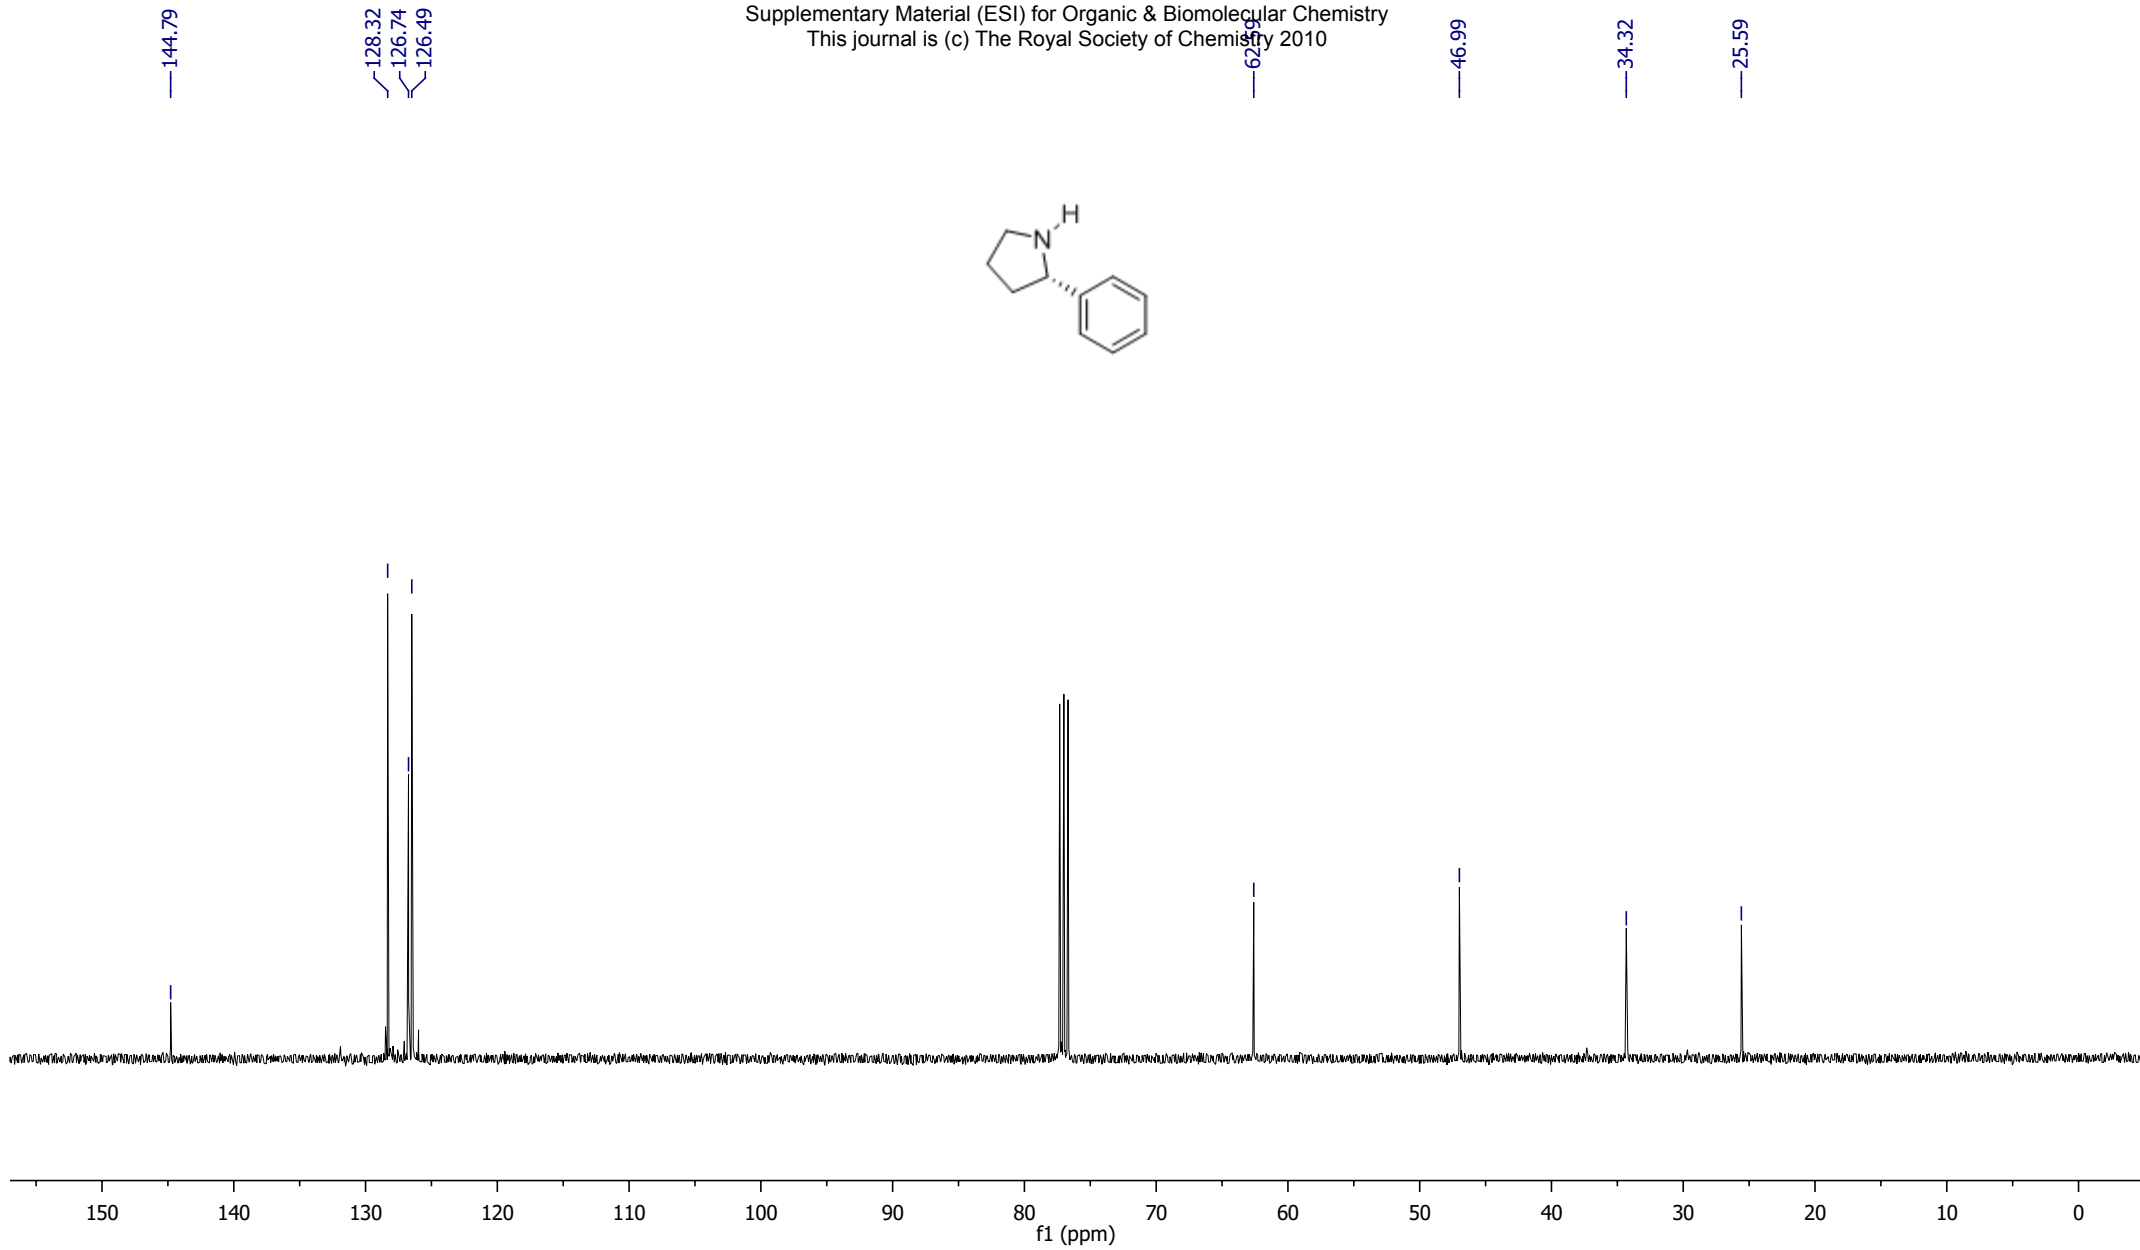

**(S)-2-Phenylpyrrolidine (16)**

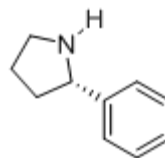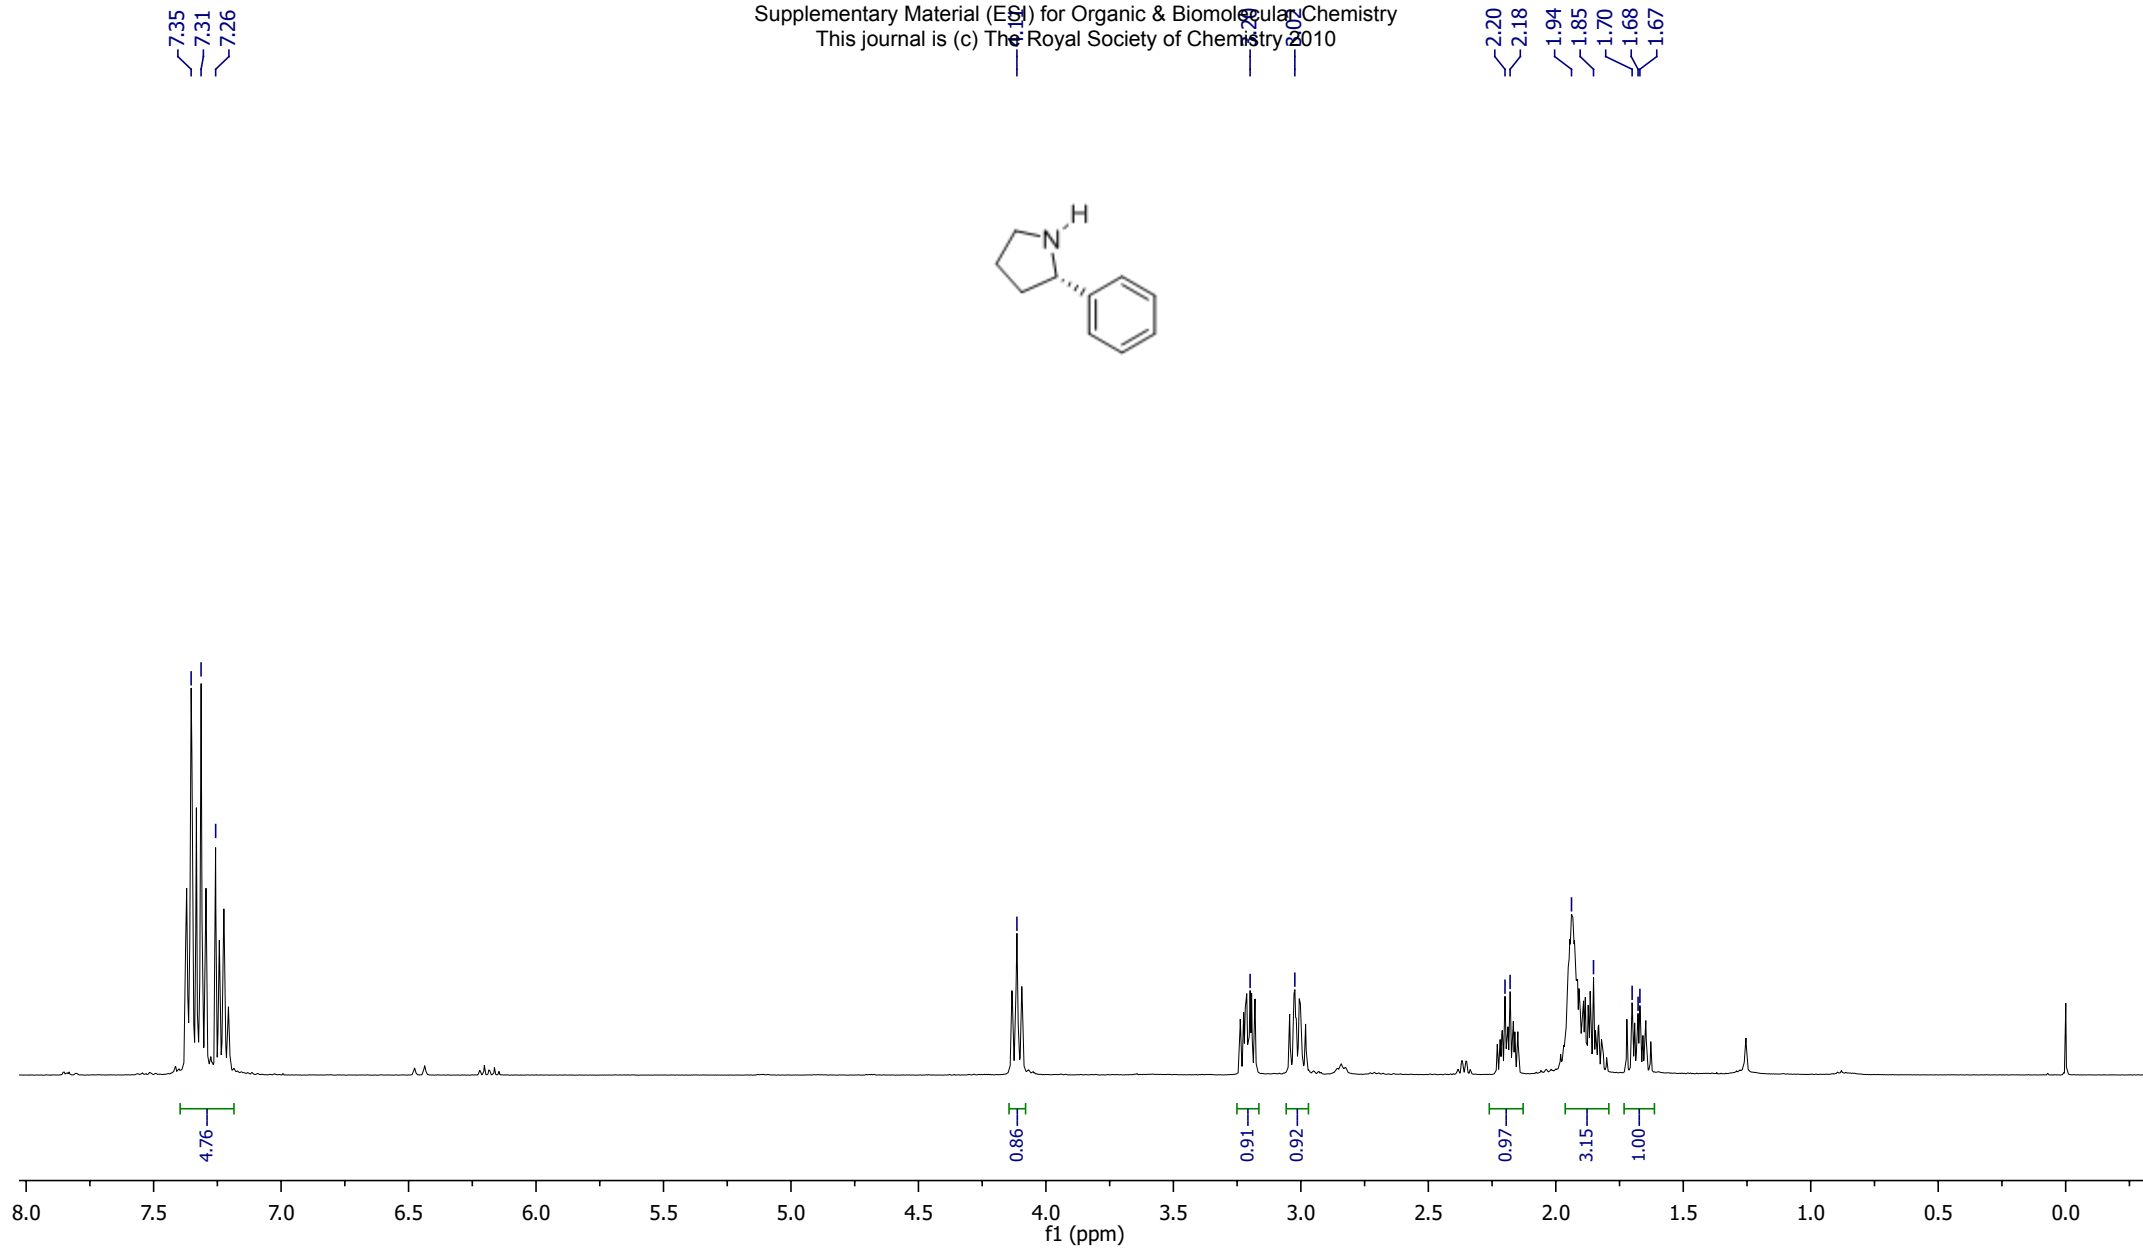

**(S)-2-Phenylpyrrolidine (16)**

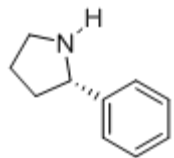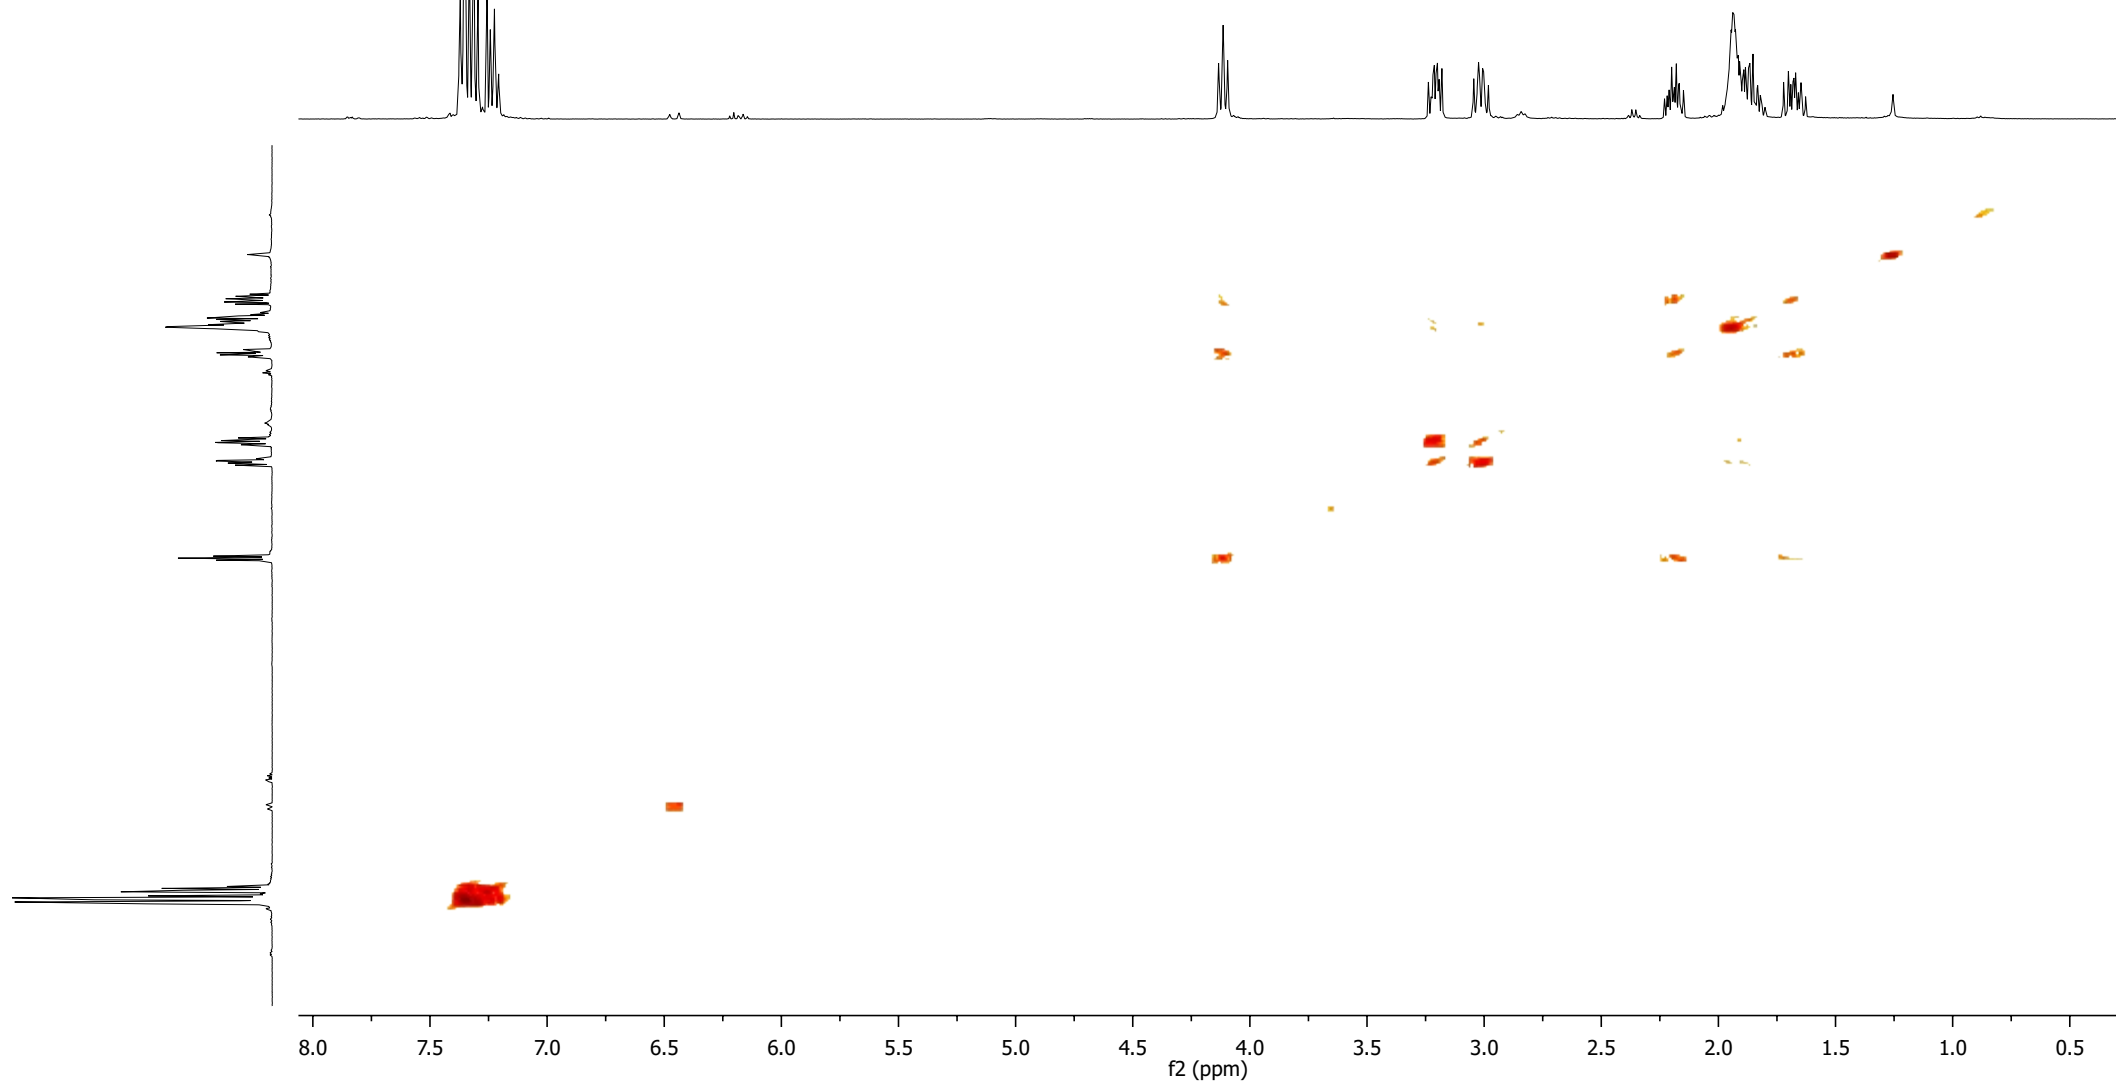

**(S)-2-Phenylpyrrolidine (16)**

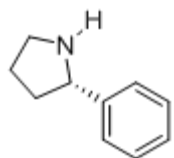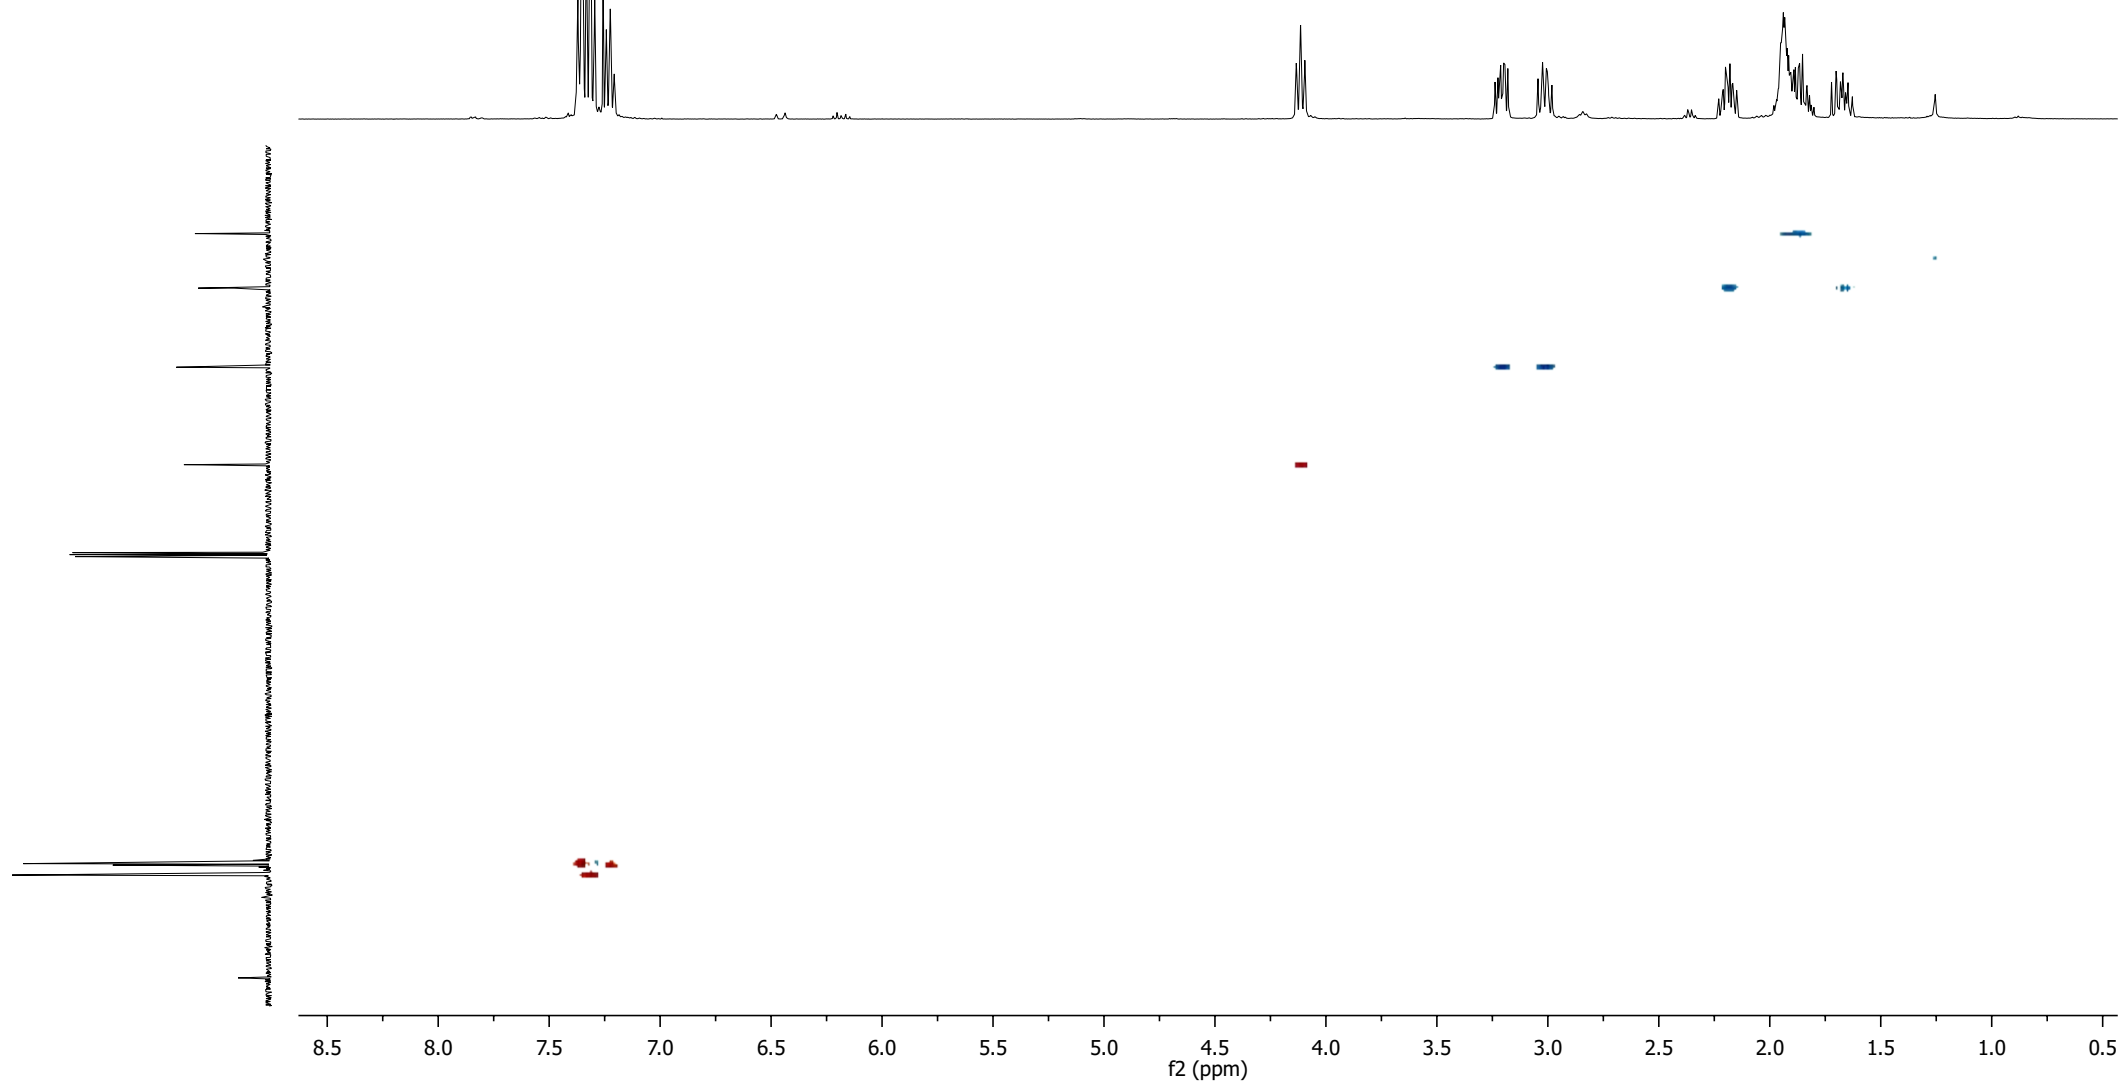

**(S)-2-Phenylpyrrolidine (16)**

—177.30

—141.92

—137.14

—129.88

—128.74

—128.01

—127.37

—126.59

—124.88

—64.09

—63.58

—63.07

—31.22

—28.71

Supplementary Material (ESI) for Organic & Biomolecular Chemistry  
This journal is (c) The Royal Society of Chemistry 2010

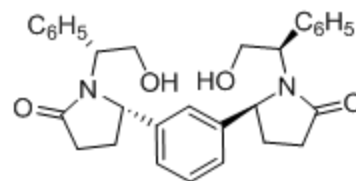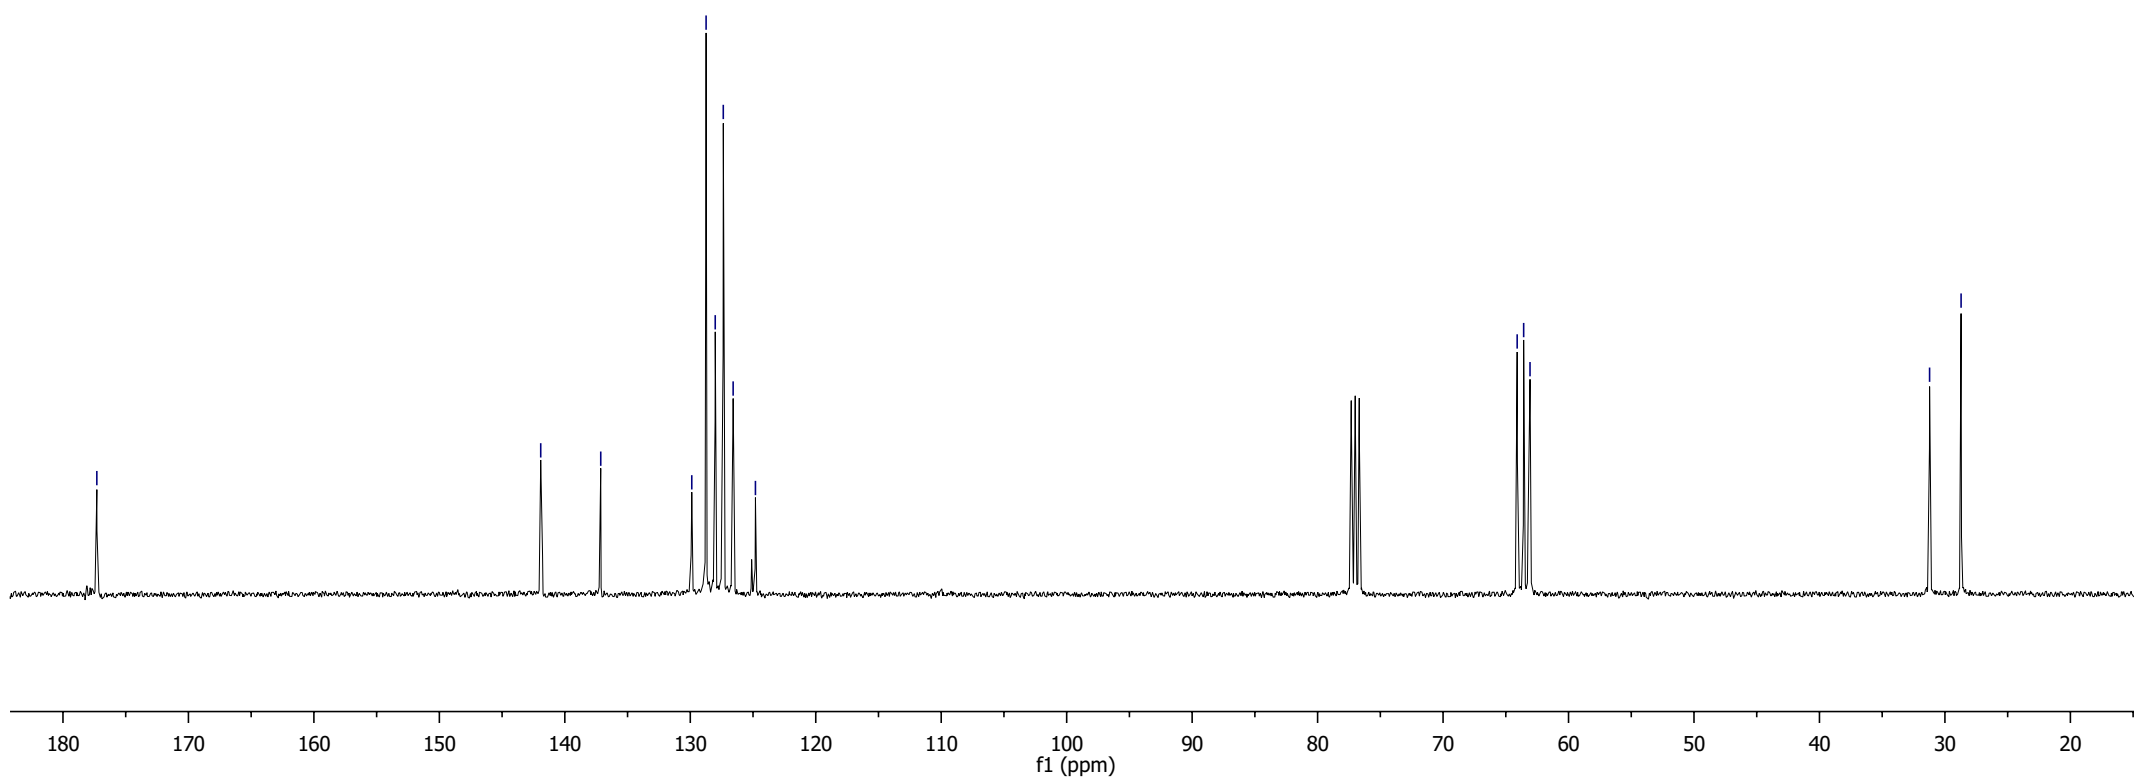

**(5S,5'S)-1,3-Bis{1-[(1R)-2-hydroxy-1-phenylethyl]-2-oxo-5-pyrrolidiny}benzene (17)**

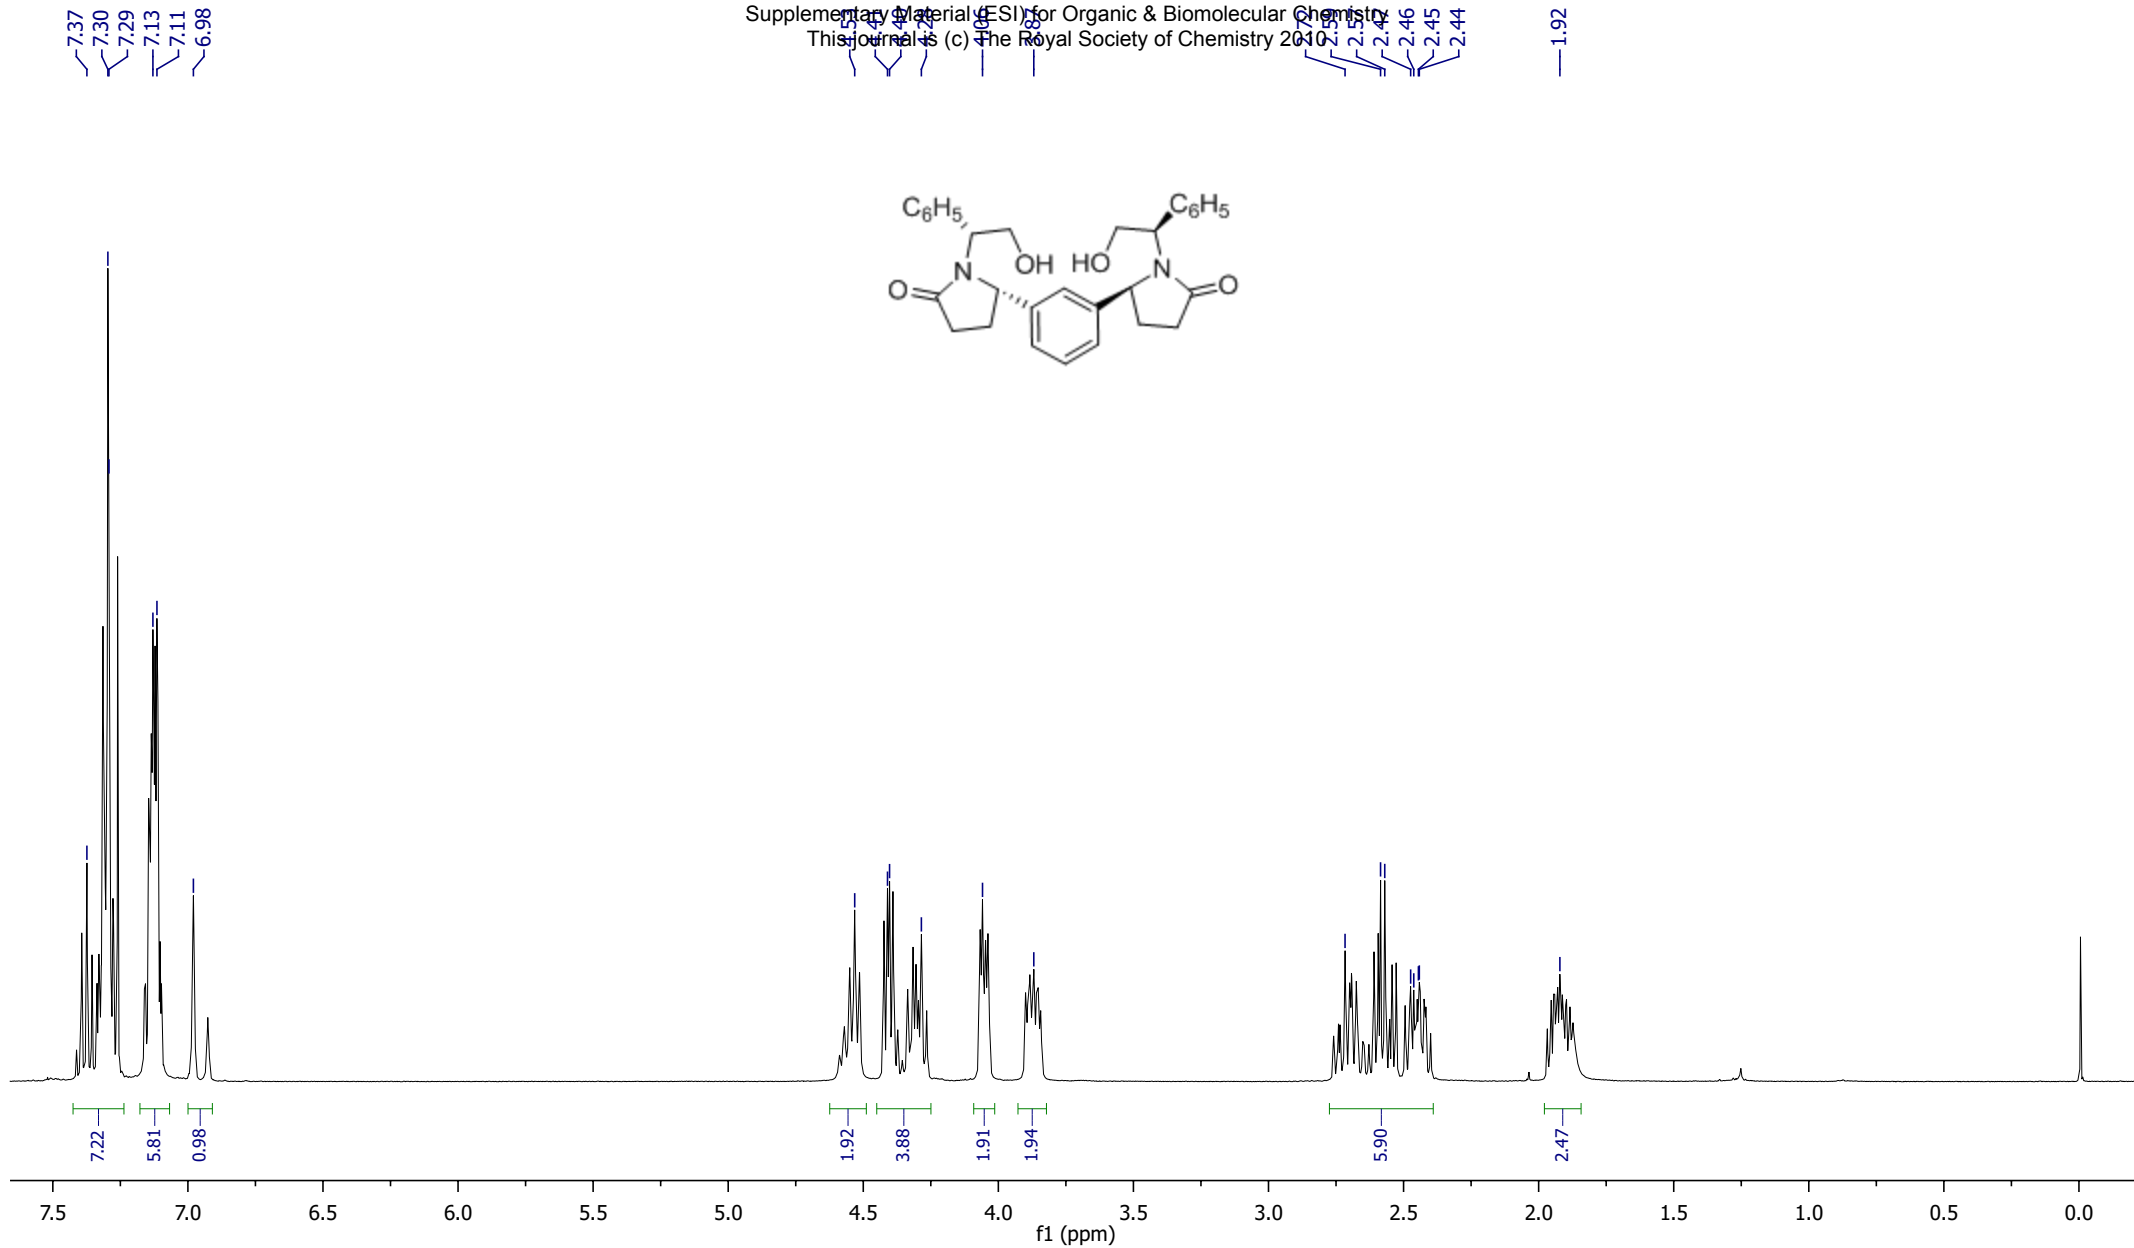

**(5S,5'S)-1,3-Bis{1-[(1R)-2-hydroxy-1-phenylethyl]-2-oxo-5-pyrrolidiny}benzene (17)**

—180.08  
—177.25

—143.36  
—141.16  
—138.79  
—137.06  
—129.39  
—128.68  
—128.36  
—127.95  
—127.39  
—127.37  
—126.88  
—126.49  
—125.78  
—125.15

—106.81

—73.10

—64.12  
—63.62  
—62.95  
—58.72

—35.53  
—32.79  
—31.26  
—28.57

Supplementary Material (ESI) for Organic & Biomolecular Chemistry  
This journal is © The Royal Society of Chemistry 2010

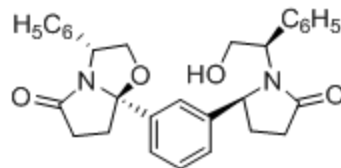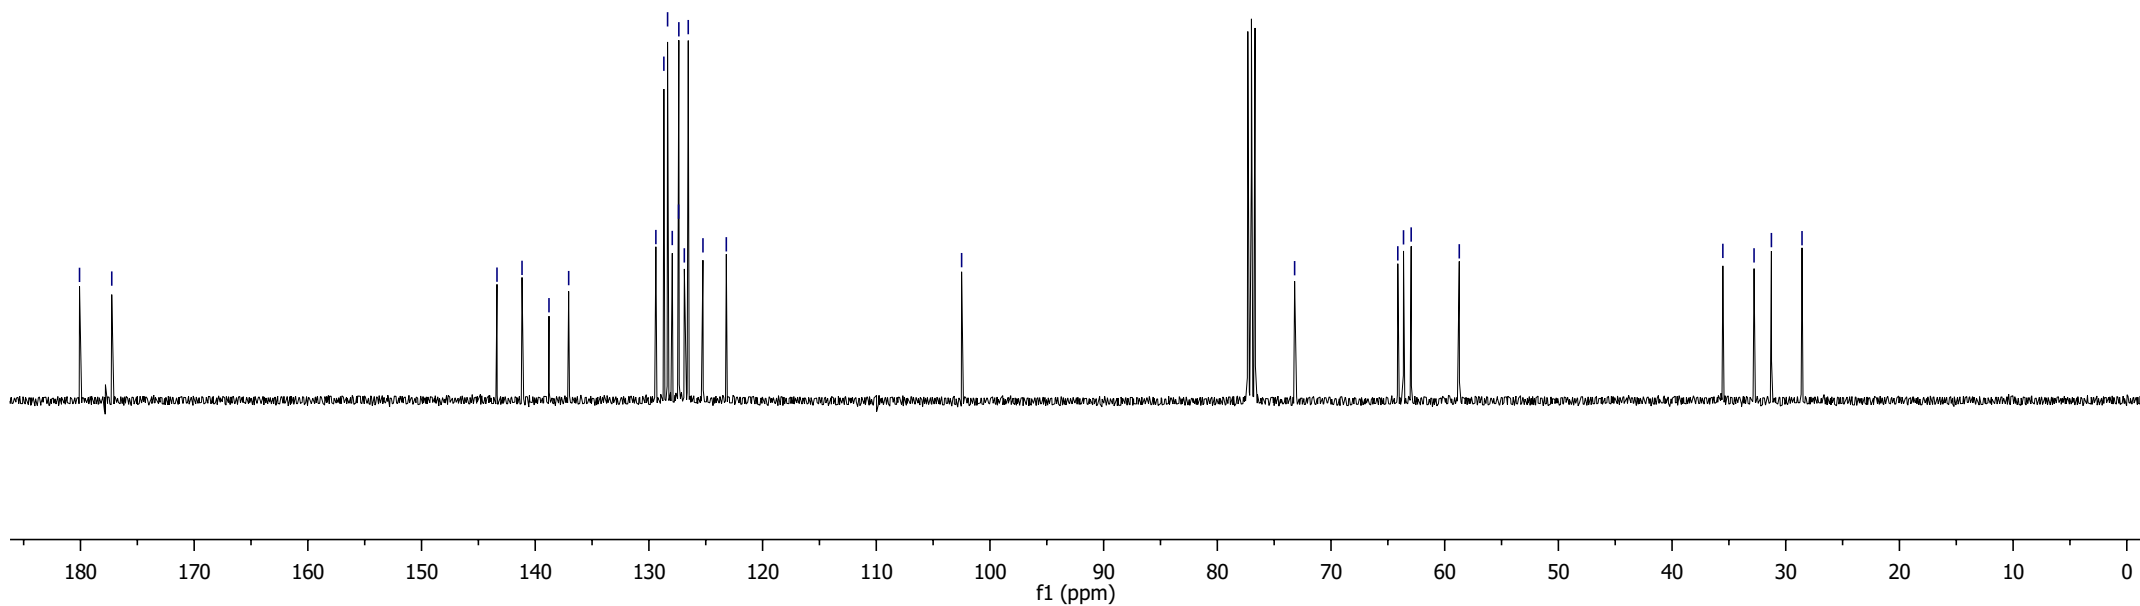

**(3R,7aR)-1-{5-oxo-3-phenyl-2,3,5,6,7,7a-hexahydropyrrolo[2,1-b]oxazol-7a-yl}-3-(5S)-{(1R)-2-hydroxy-1-phenylethyl}-2-oxo-5-pyrrolidinylbenzene (18)**



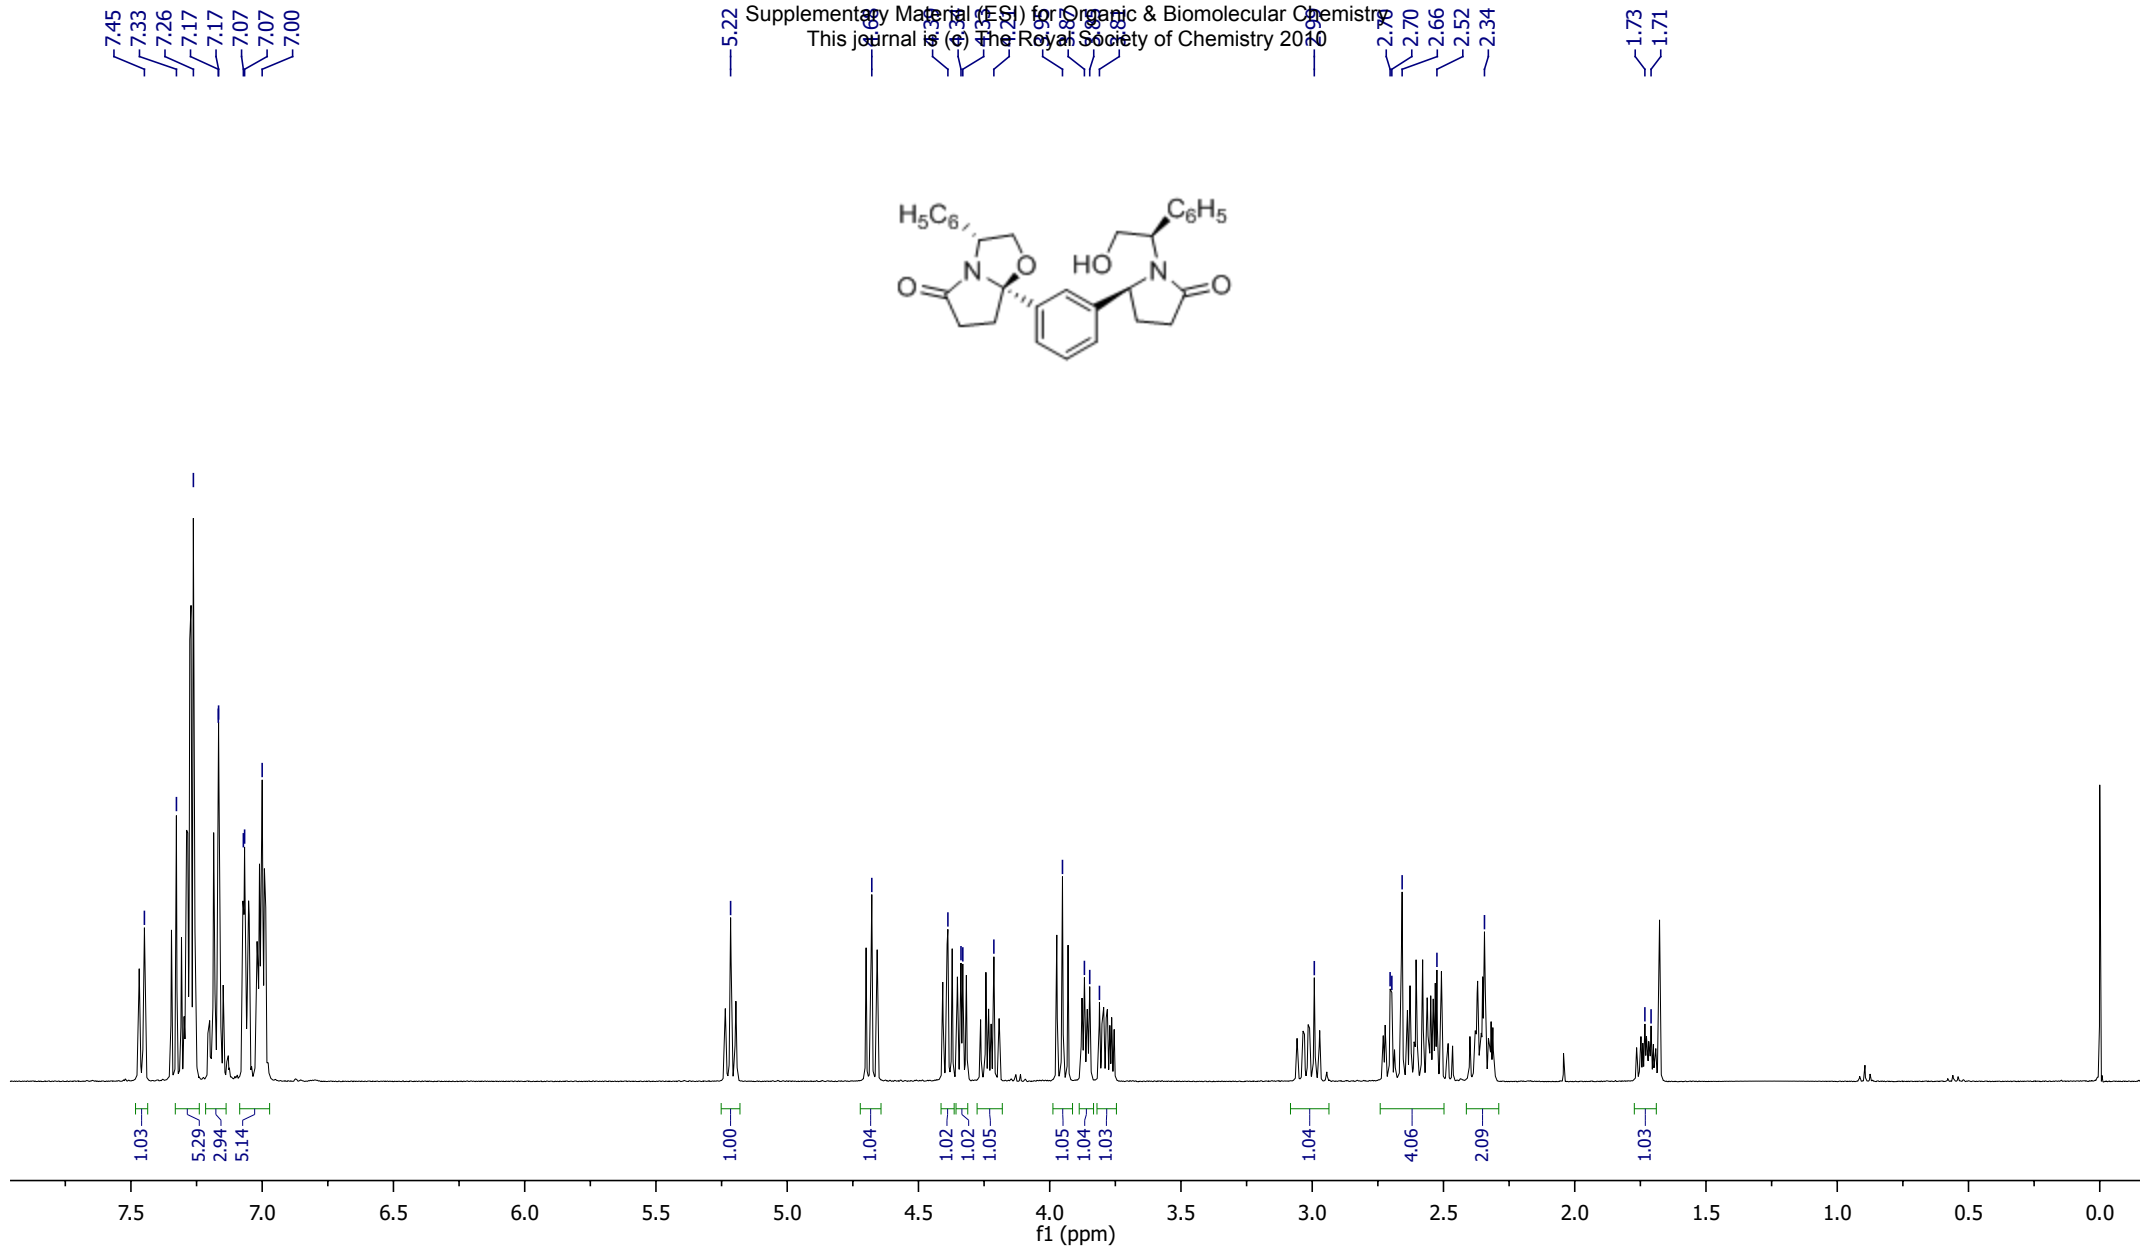

**(3*R*,7*aR*)-1-{5-oxo-3-phenyl-2,3,5,6,7,7*a*-hexahydropyrrolo[2,1-*b*]oxazol-7*a*-yl}-3-(5*S*)-{(1*R*)-2-hydroxy-1-phenylethyl}-2-oxo-5-pyrrolidinylbenzene (18)**

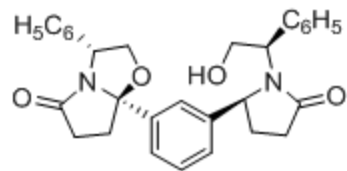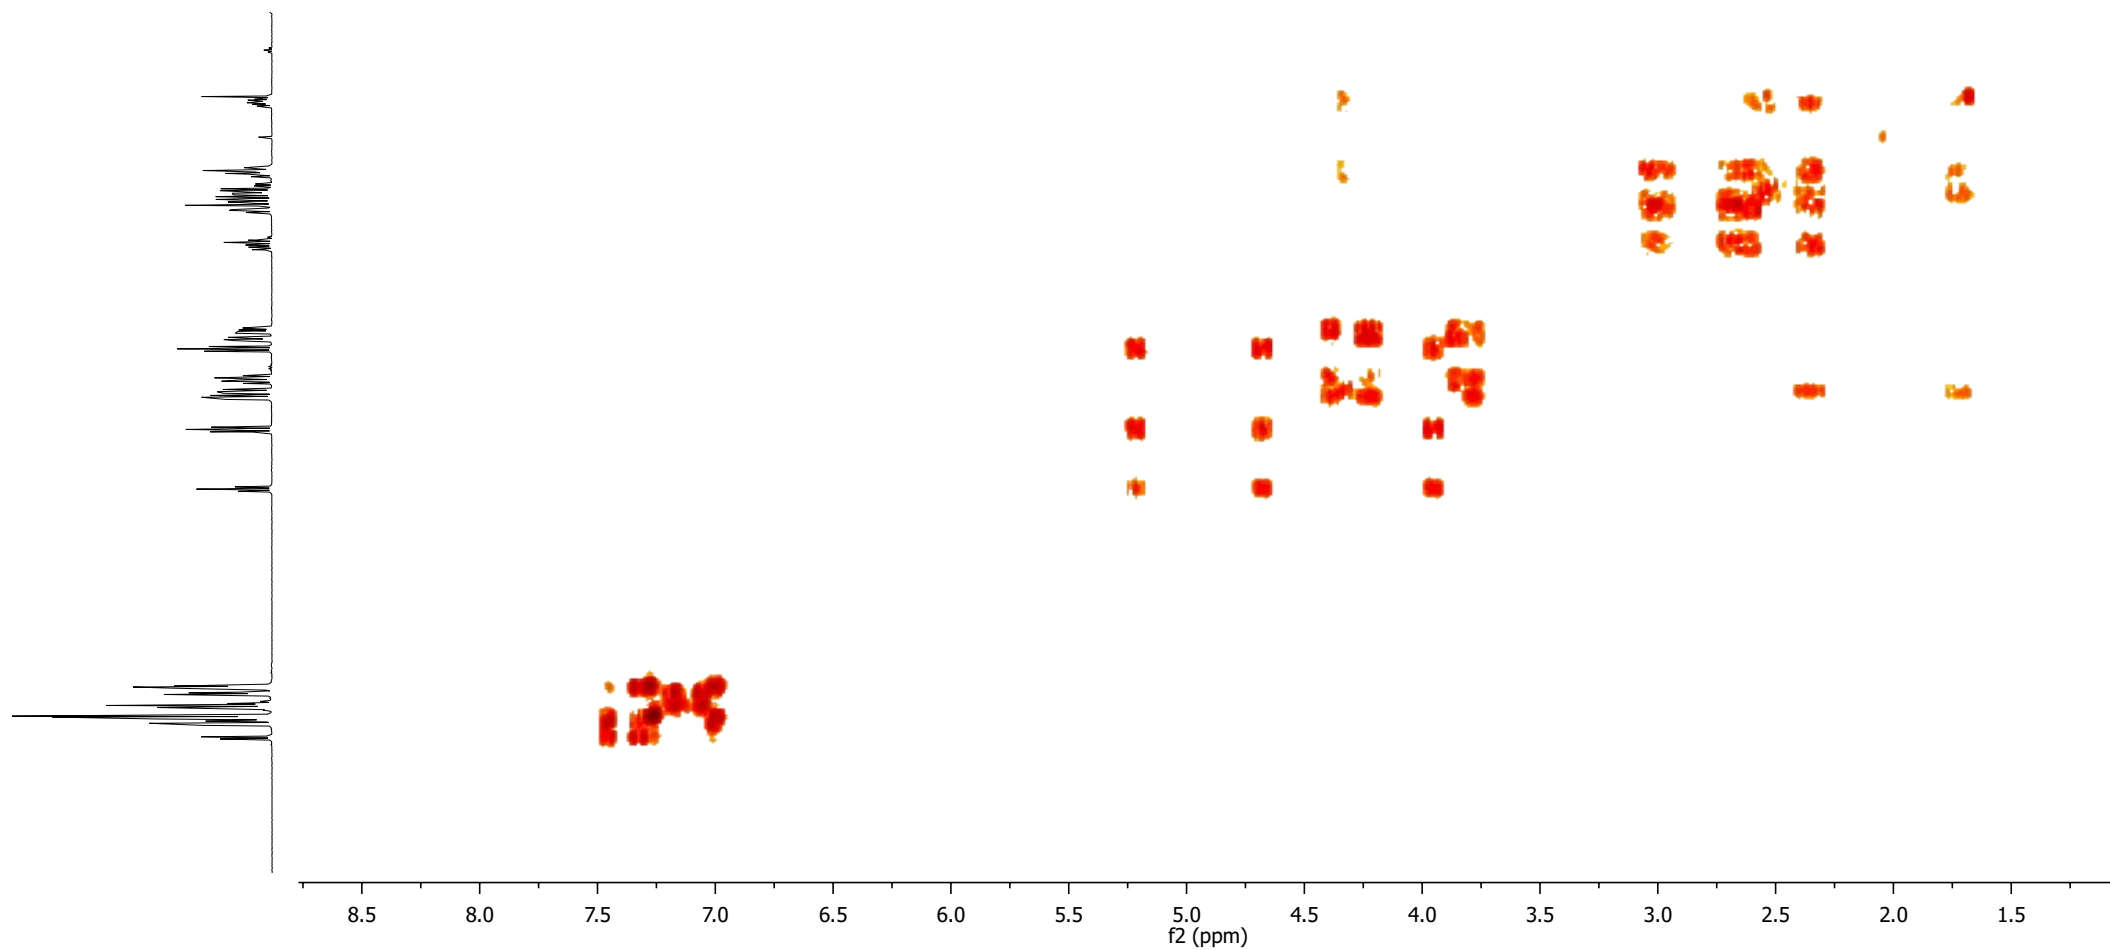

**(3R,7aR)-1-{5-oxo-3-phenyl-2,3,5,6,7,7a-hexahydropyrrolo[2,1-b]oxazol-7a-yl}-3-(5S)-{(1R)-2-hydroxy-1-phenylethyl}-2-oxo-5-pyrrolidiny]benzene (18)**

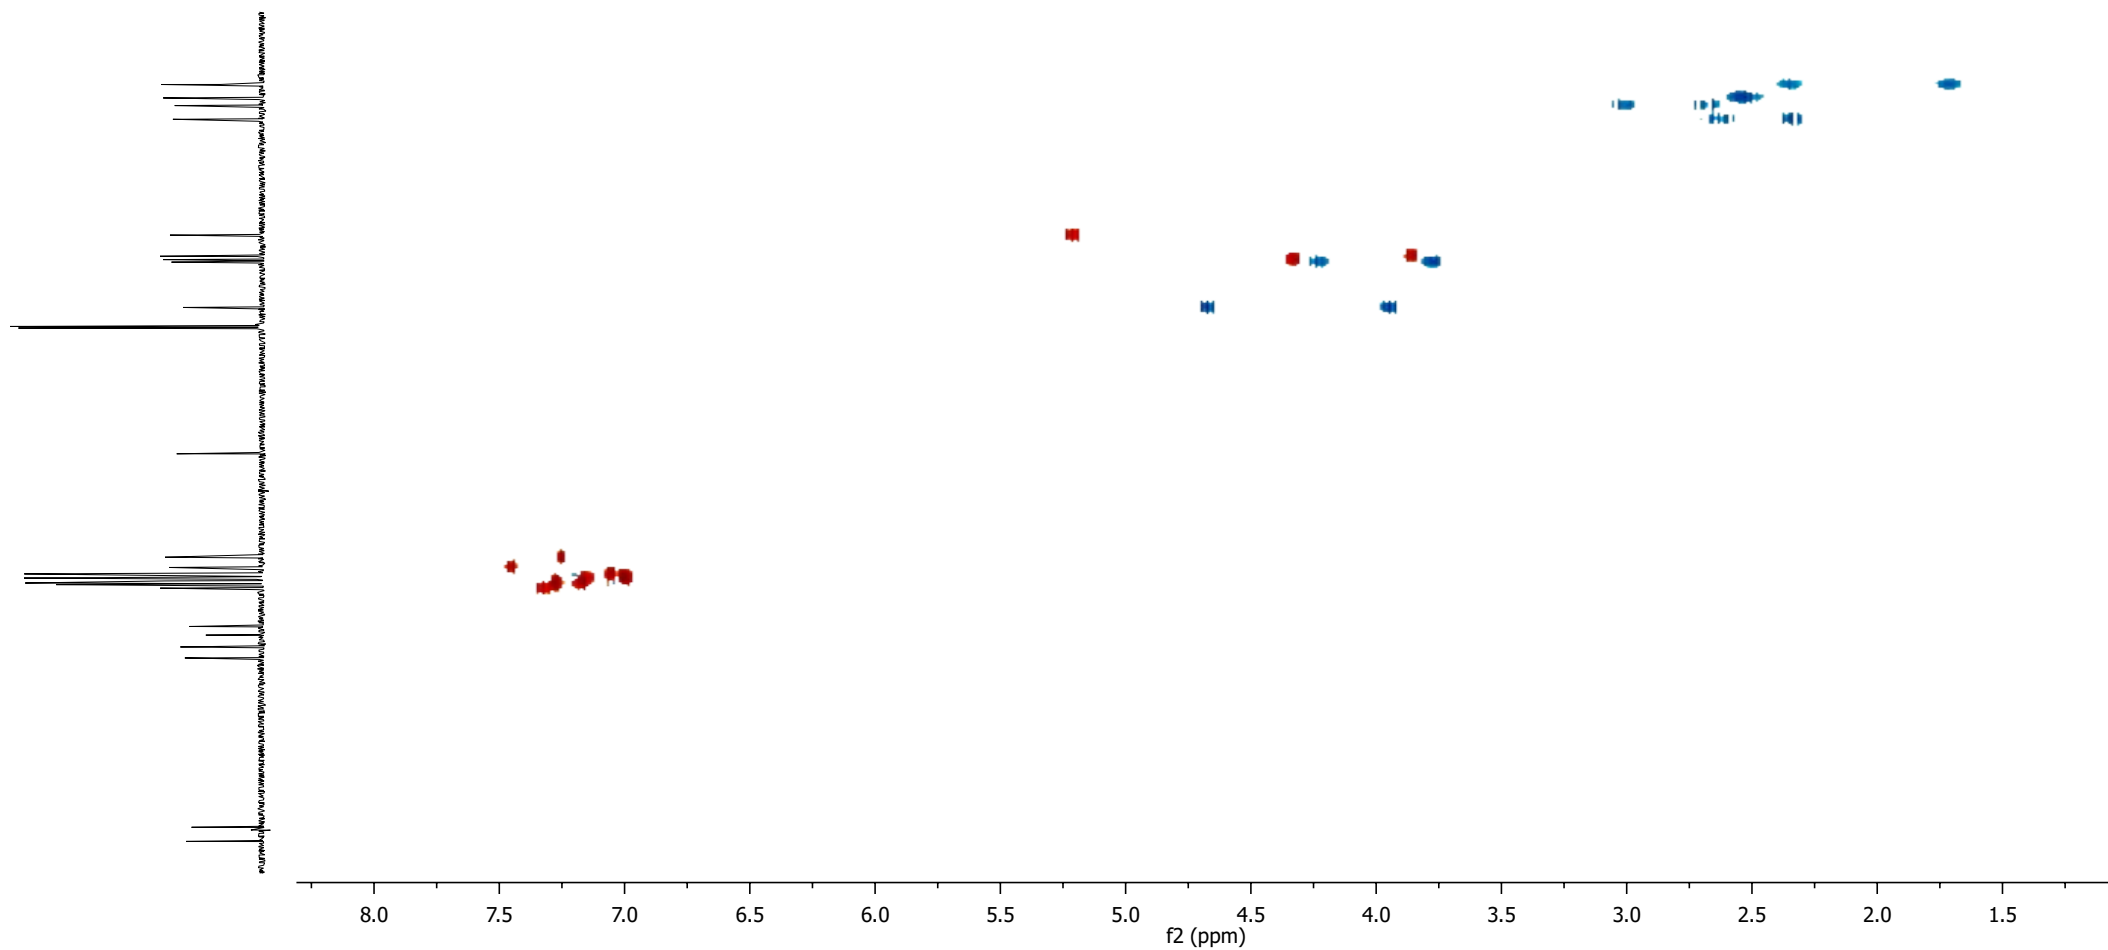

**(3*R*,7*aR*)-1-{5-oxo-3-phenyl-2,3,5,6,7,7*a*-hexahydropyrrolo[2,1-*b*]oxazol-7*a*-yl}-3-(5*S*)-{(1*R*)-2-hydroxy-1-phenylethyl}-2-oxo-5-pyrrolidiny]benzene (18)**

—176.76

—141.89

—137.64

—129.17

—128.75

—128.40

—127.84

—127.48

—125.18

—62.67

—60.57

—44.17

—31.06

—29.08

Supplementary Material (ESI) for Organic & Biomolecular Chemistry  
This journal is (c) The Royal Society of Chemistry 2010

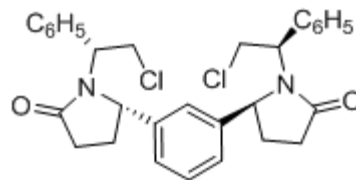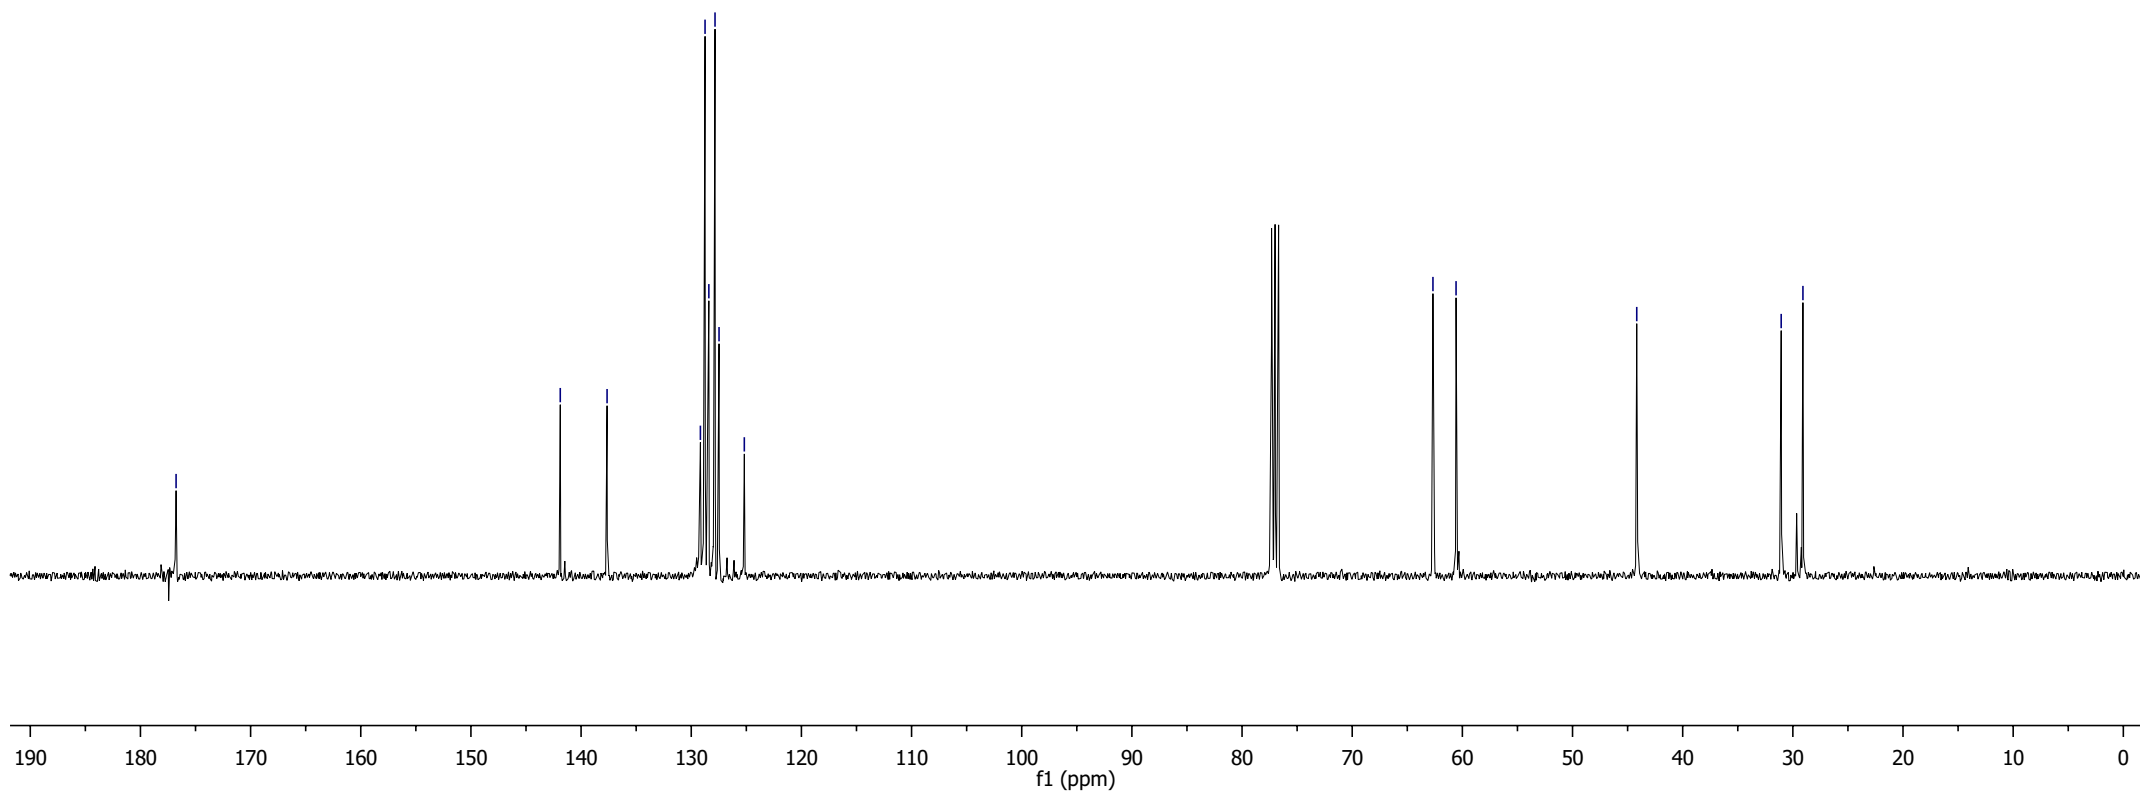

**(5S,5'S)-1,3-Bis{1-[(1R)-2-chloro-1-phenylethyl]-2-oxo-5-pyrrolidinyl}benzene (19)**

7.26  
7.13  
7.12

4.88  
4.81  
4.78  
4.71  
4.68

2.63  
2.62  
2.41

1.91  
1.90

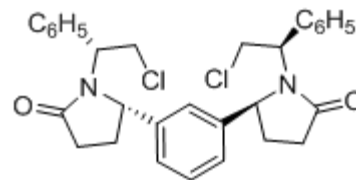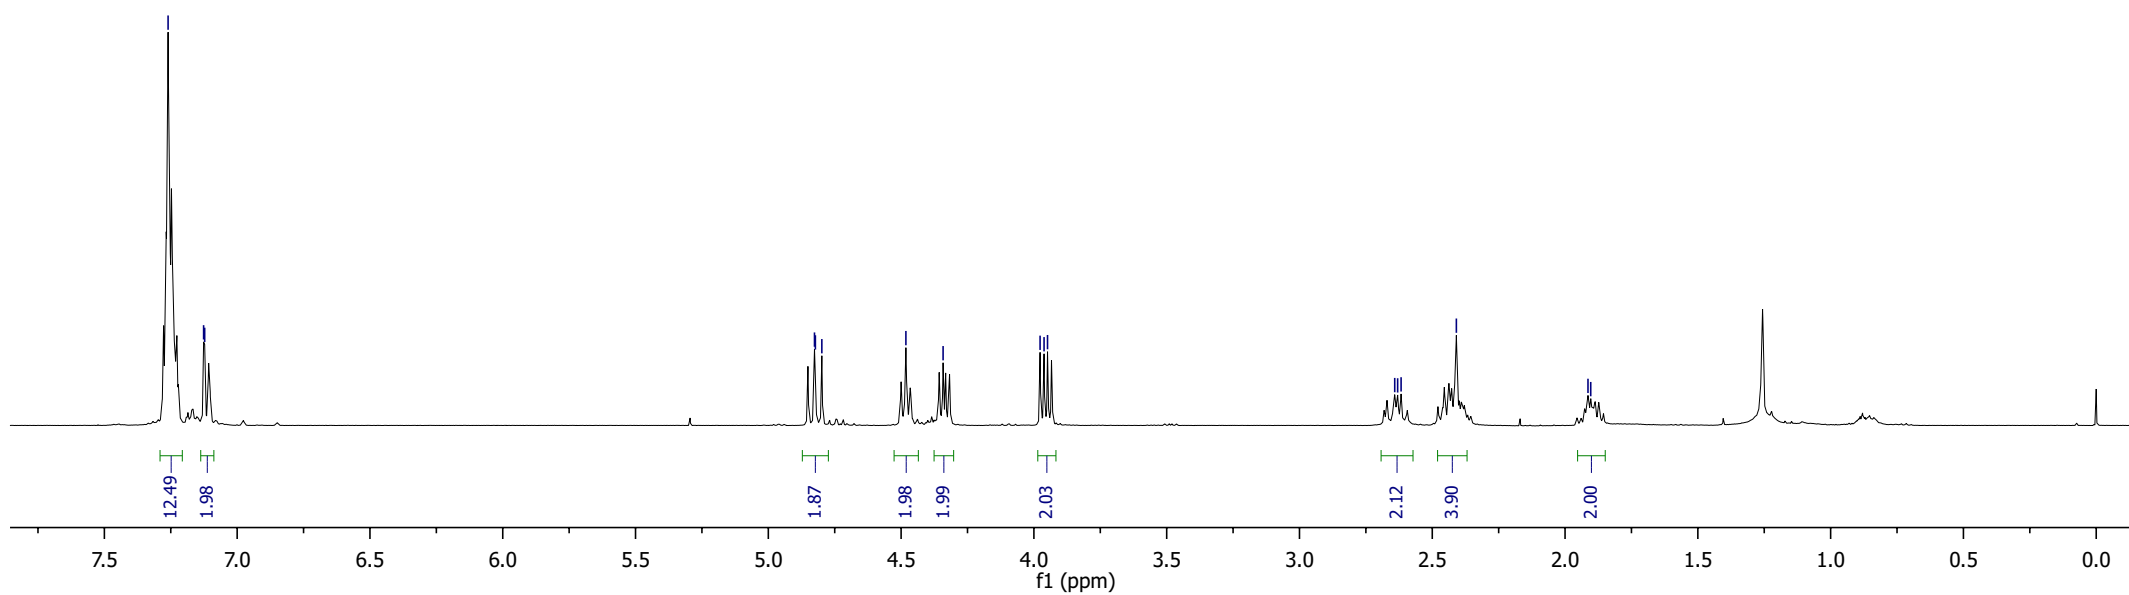

**(5S,5'S)-1,3-Bis{1-[(1R)-2-chloro-1-phenylethyl]-2-oxo-5-pyrrolidinyl}benzene (19)**

—174.70

—141.87  
—141.34

—136.00

—128.85

—128.36

—128.22

—126.37

—126.19

—124.98

—115.39

—63.24

—31.01

—28.58

Supplementary Material (ESI) for Organic & Biomolecular Chemistry  
This journal is (c) The Royal Society of Chemistry 2010

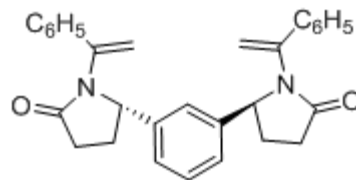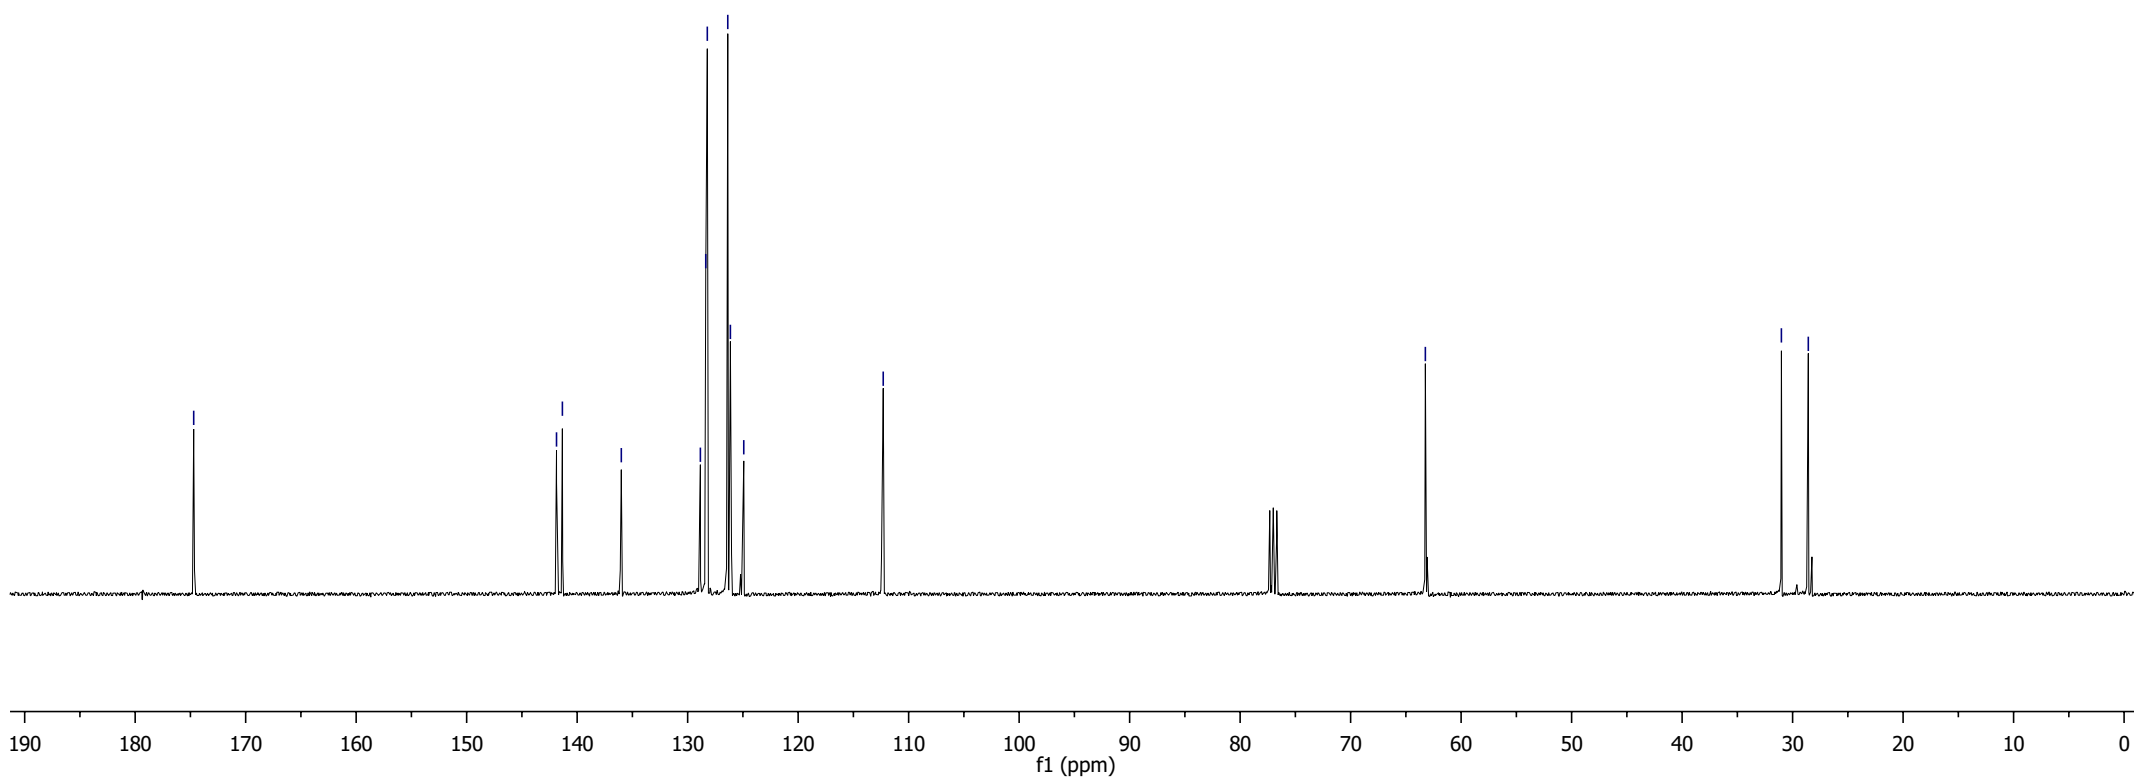

**(5S,5'S)-1,3-Bis[1-(1-phenylvinyl)-2-oxo-5-pyrrolidiny]benzene (20)**

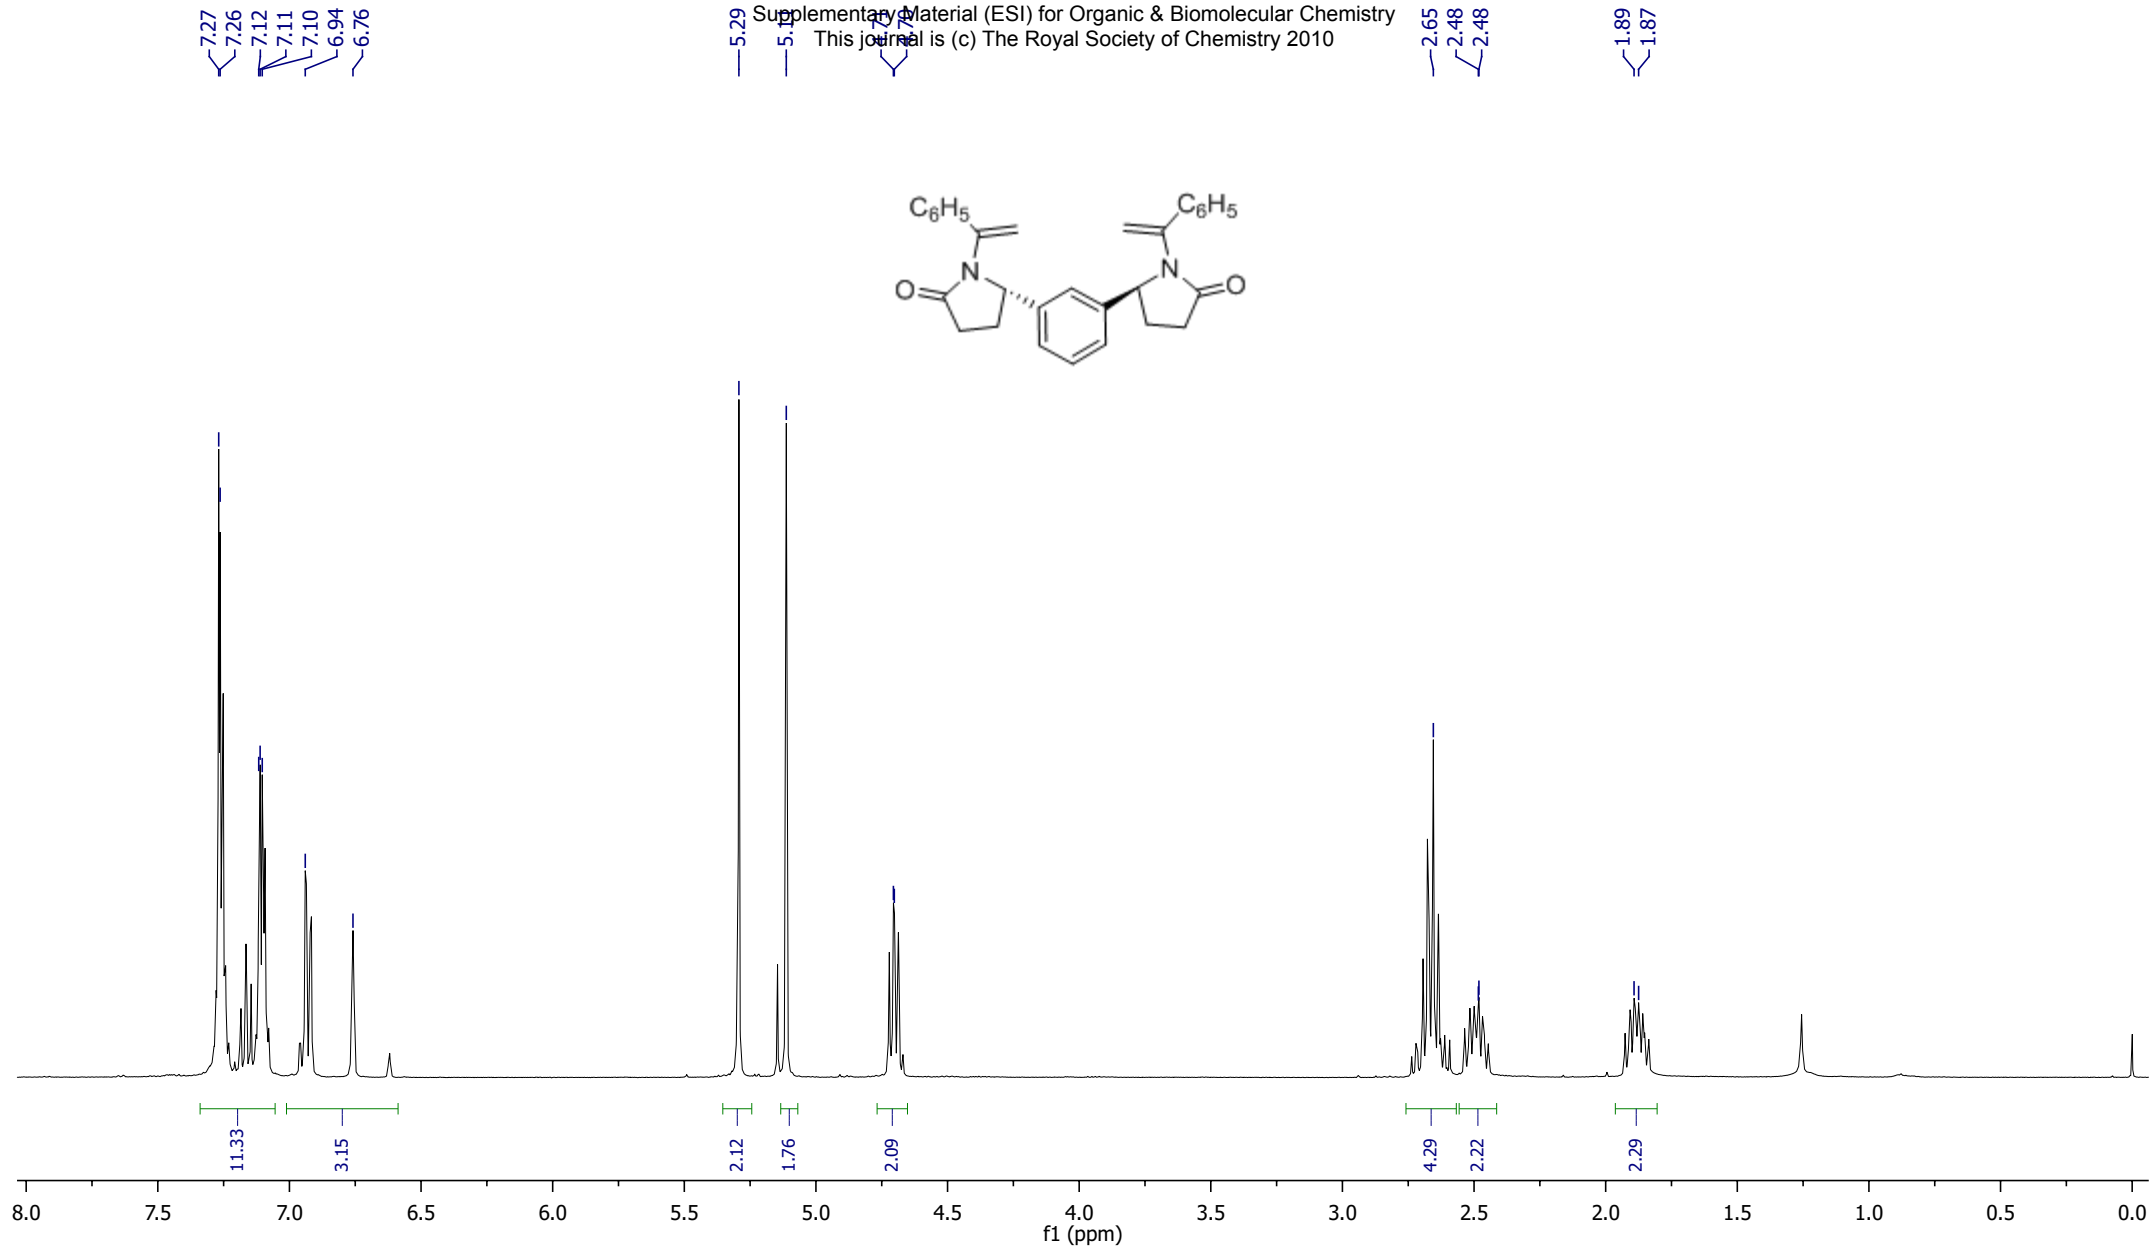

**(5S,5'S)-1,3-Bis[1-(1-phenylvinyl)-2-oxo-5-pyrrolidiny]benzene (20)**

—181.27

—145.00

—131.33

—127.28

—125.16

—59.69

—32.17

—31.46

Supplementary Material (ESI) for Organic & Biomolecular Chemistry  
This journal is (c) The Royal Society of Chemistry 2010

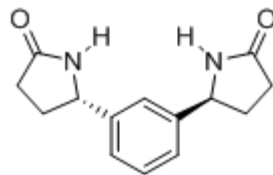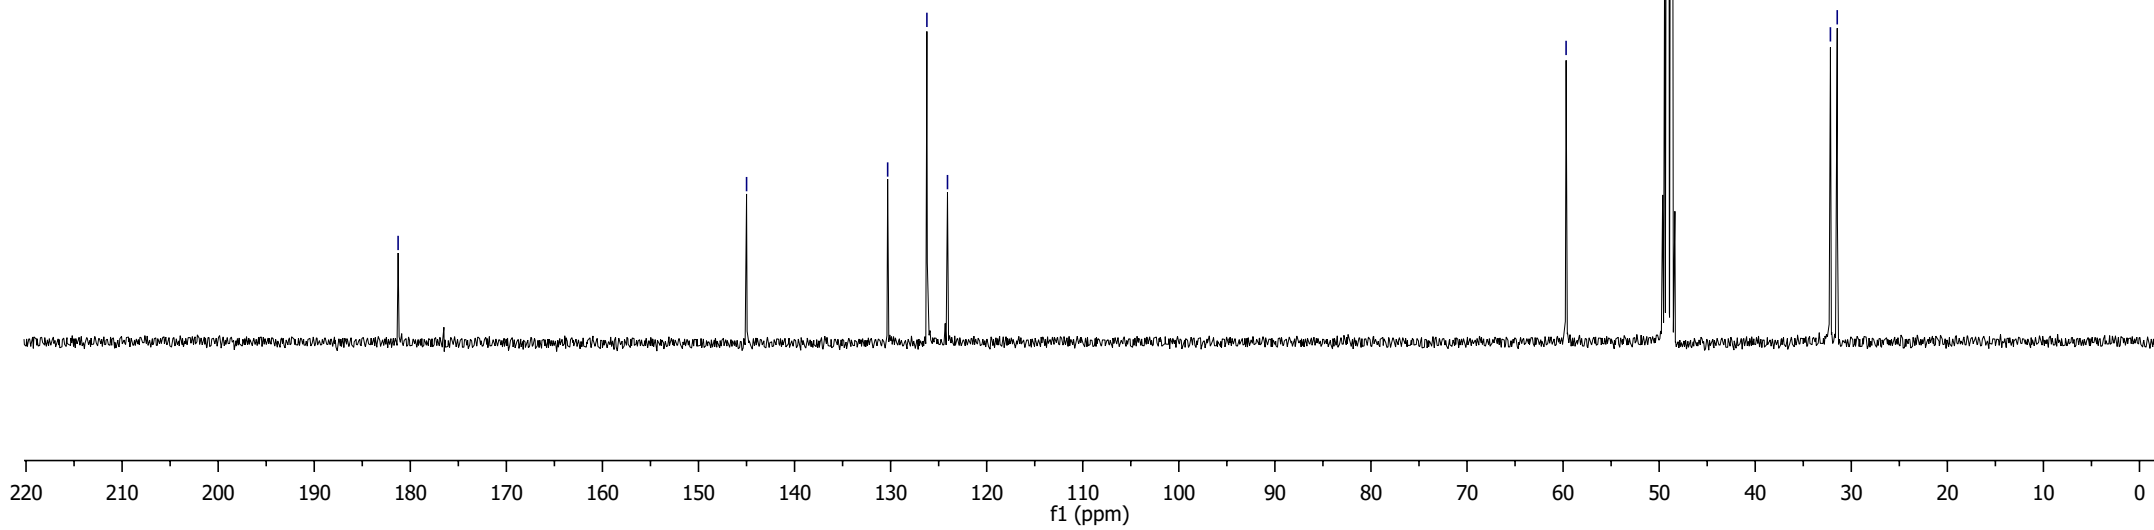

**(5S,5'S)-1,3-Bis(2-oxo-5-pyrrolidiny)benzene (21)**



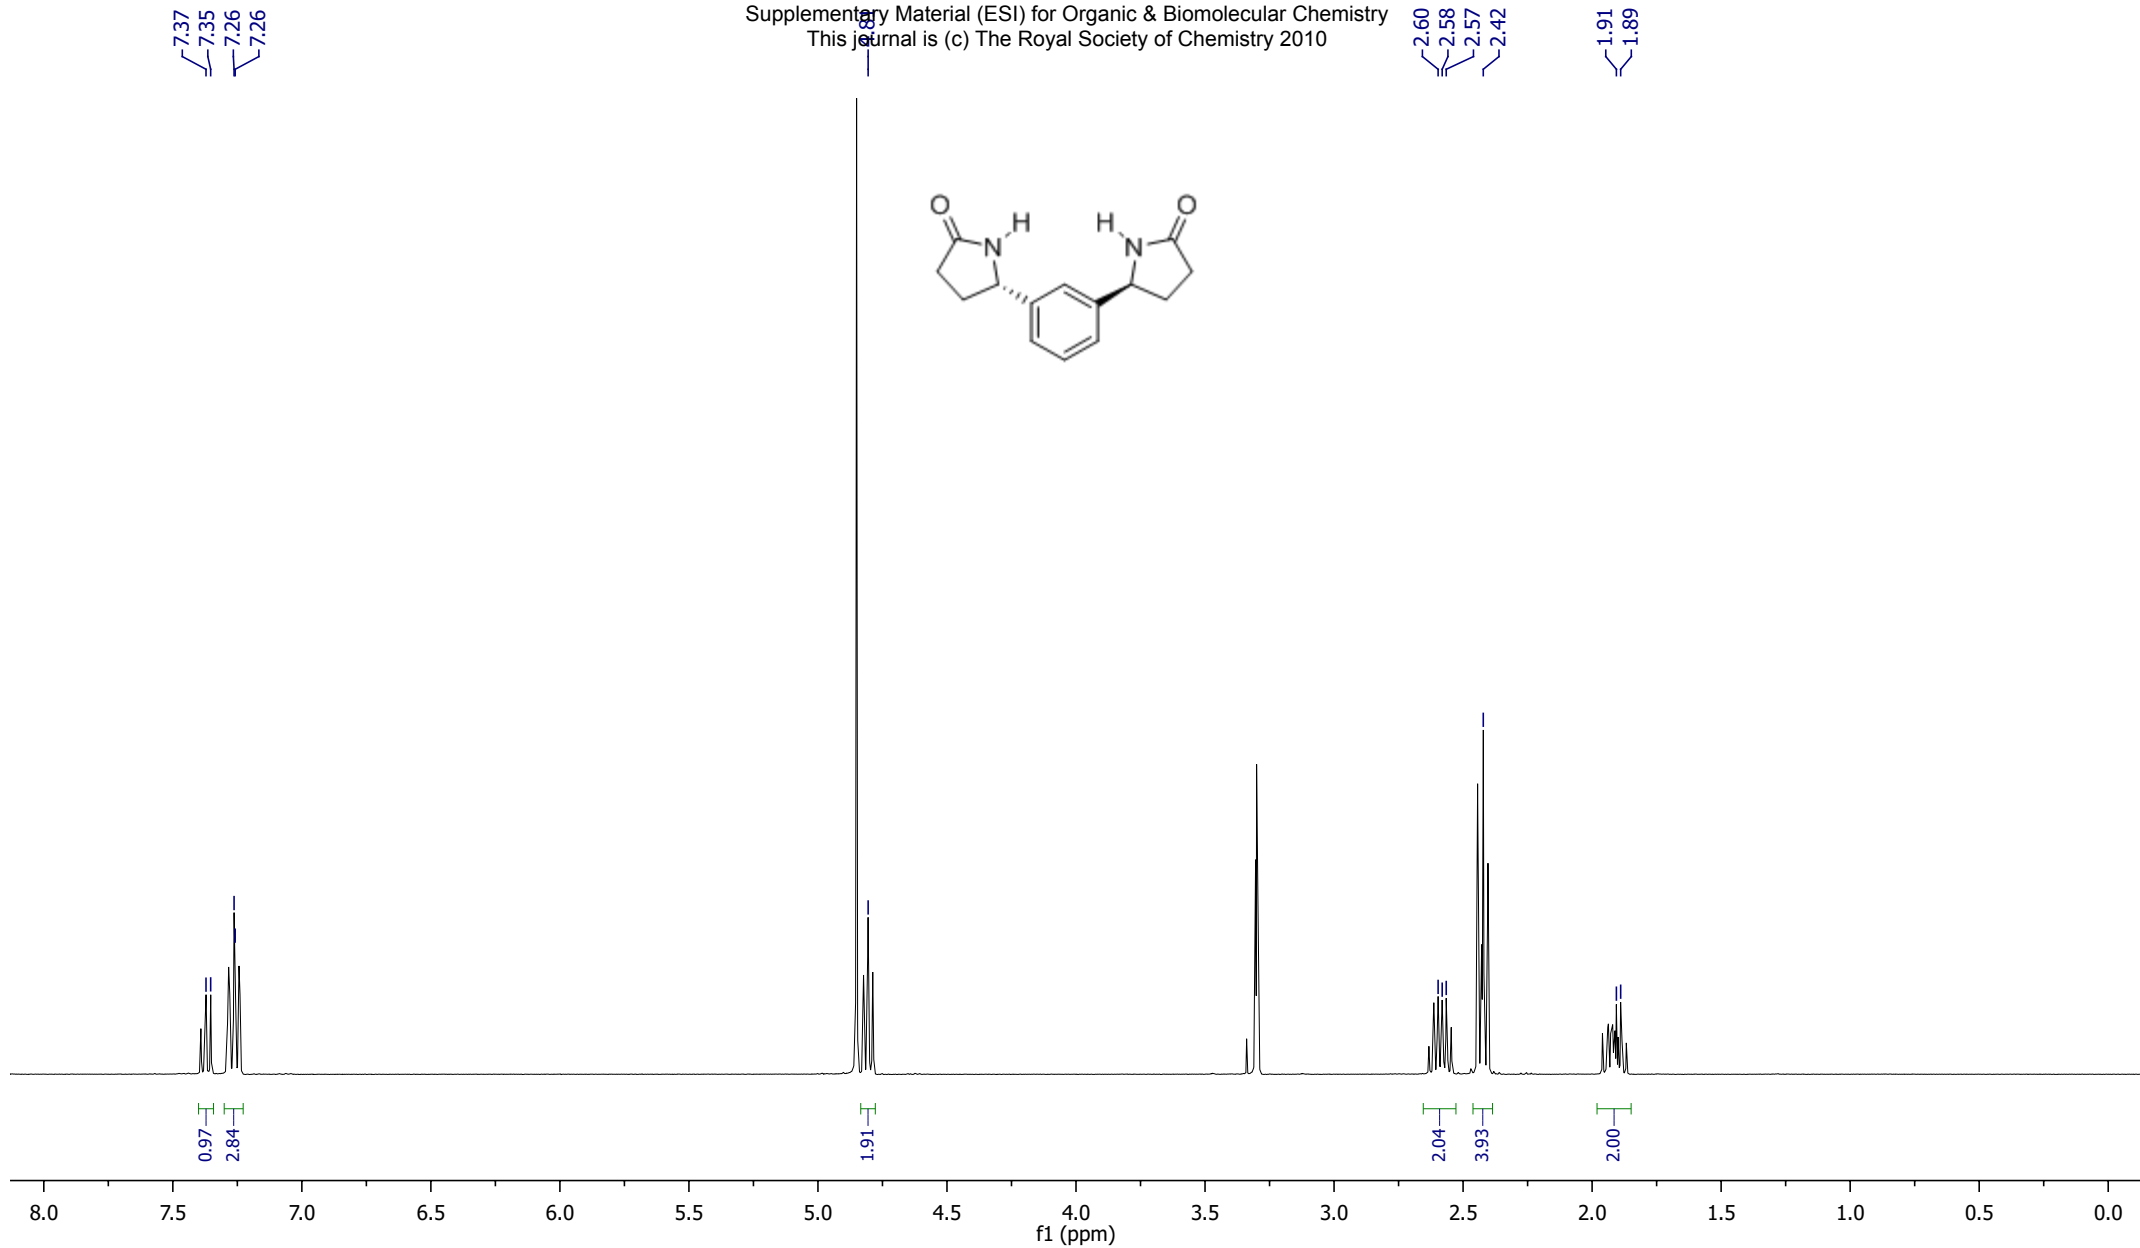

**(5S,5'S)-1,3-Bis(2-oxo-5-pyrrolidiny)benzene (21)**

—144.74

—128.34  
—124.96  
—124.72

—62.77

—46.94

—34.25

—25.55

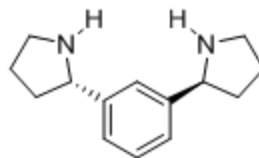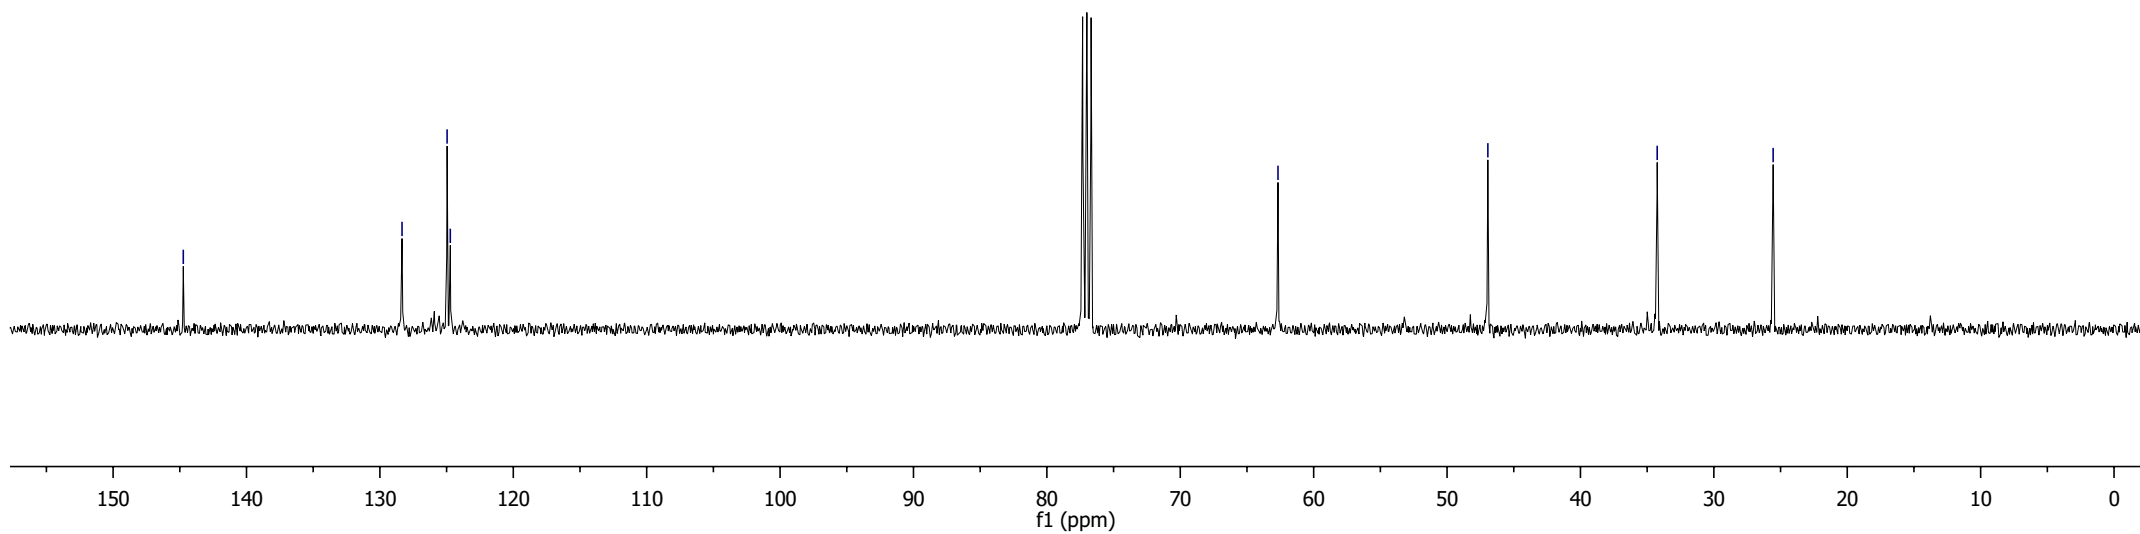

**(2S)-1,3-Di(pyrrolidinyl)benzene (22)**

7.36  
7.35  
7.26

2.19  
2.19  
2.17

1.84  
1.72  
1.69  
1.69  
1.66

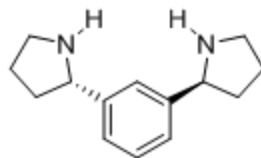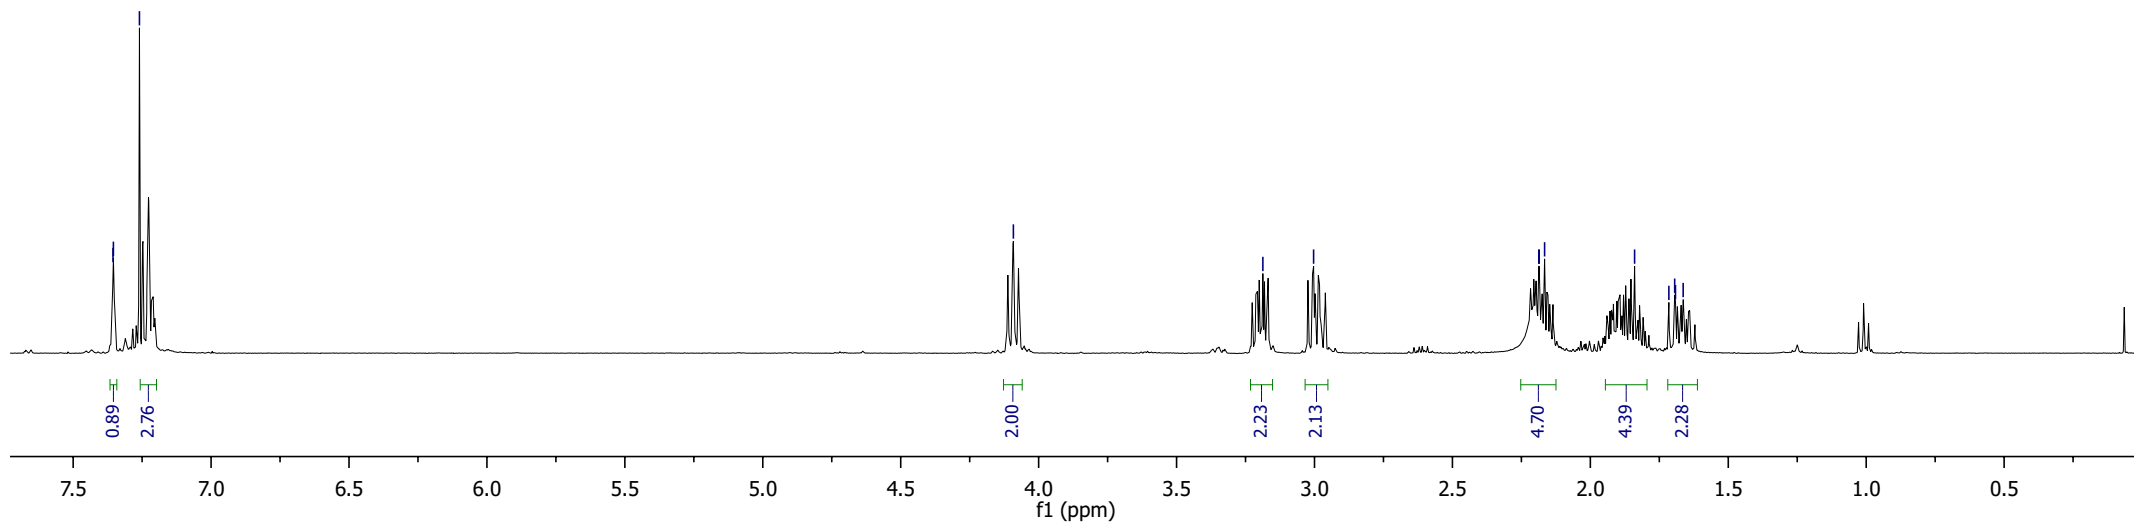

**(2S)-1,3-Di(pyrrolidinyl)benzene (22)**
